# Supplementary material
Source: PubMed Central journal article supplement (PMC3587652)
Supplement: NIHMS391221-supplement-1_si_001.pdf [file NIHMS391221-supplement-1_si_001.pdf]

## Outer-Sphere Direction in Iridium C-H Borylation

Philipp C. Roosen, Venkata A. Kallepalli, Buddhadeb Chattopadhyay,

Daniel A. Singleton,\* Robert E. Maleczka, Jr.,\* Milton R. Smith, III\*

*Department of Chemistry, Michigan State University, East Lansing, Michigan*

*48824-1322 USA*

*Department of Chemistry, Texas A&M University, P.O. Box 30012, College Station, Texas*

*77842 USA*

## Supporting Information

Contents:

|                                                                                                                                            |     |
|--------------------------------------------------------------------------------------------------------------------------------------------|-----|
| General Information.....                                                                                                                   | S4  |
| Preparation of <i>N</i> - <i>t</i> -Boc protected anilines.....                                                                            | S5  |
| Preparation of <i>N</i> -( <i>tert</i> -butoxycarbonyl)- <i>N</i> -methyl-3-chloroaniline ( <b>12a</b> ) .....                             | S10 |
| Preparation of 3-chlorophenyl <i>tert</i> -butylcarbamate ( <b>12b</b> ).....                                                              | S11 |
| Preparation of <i>N</i> -(3-chlorophenyl)-3,3-dimethylbutanamide ( <b>12c</b> ).....                                                       | S11 |
| Preparation of <i>N</i> -( <i>tert</i> -butoxycarbonyl)- <i>N</i> -deuterio-3-chloroaniline ( <b>7-d<sub>1</sub></b> ).....                | S12 |
| Preparation of <i>O</i> -( <i>N</i> ', <i>N</i> '-dimethylcarbamoyl)- <i>N</i> -( <i>tert</i> -butoxycarbonyl)-4-aminophenol .....         | S12 |
| Preparation of <i>O</i> -( <i>N</i> ', <i>N</i> '-dimethylcarbamoyl)- <i>N</i> -( <i>tert</i> -butoxycarbonyl)-2-chloro-4-aminophenol..... | S13 |
| Preparation of Enamine <b>20</b> .....                                                                                                     | S13 |
| Preparation of <i>o</i> -bromo-, <i>m</i> -bromo- and <i>p</i> -bromo-phenyl carbamic acid methyl esters .....                             | S14 |
| Preparation of methyl 2-(4,4,5,5-tetramethyl-1,3,2-dioxaborlan-2-yl) phenylcarbamate .....                                                 | S14 |
| Preparation of methyl 3-(4,4,5,5-tetramethyl-1,3,2-dioxaborlan-2-yl) phenylcarbamate .....                                                 | S14 |
| Preparation of methyl 4-(4,4,5,5-tetramethyl-1,3,2-dioxaborlan-2-yl) phenylcarbamate .....                                                 | S15 |
| Iridium C–H borylations .....                                                                                                              | S15 |

|                                                                                                                                           |      |
|-------------------------------------------------------------------------------------------------------------------------------------------|------|
| $^1\text{H}$ and $^{13}\text{C}\{^1\text{H}\}$ NMR spectra of substrates.....                                                             | S30  |
| $^1\text{H}$ and $^{13}\text{C}\{^1\text{H}\}$ NMR spectra of methyl 2-(4,4,5,5-tetramethyl-1,3,2-dioxaborlan-2-yl) phenylcarbamate ..... | S62  |
| $^1\text{H}$ and $^{13}\text{C}\{^1\text{H}\}$ NMR spectra of methyl 3-(4,4,5,5-tetramethyl-1,3,2-dioxaborlan-2-yl) phenylcarbamate ..... | S64  |
| $^1\text{H}$ and $^{13}\text{C}\{^1\text{H}\}$ NMR spectra of methyl 4-(4,4,5,5-tetramethyl-1,3,2-dioxaborlan-2-yl) phenylcarbamate ..... | S66  |
| $^1\text{H}$ NMR, nOe $^1\text{H}$ NMR, and $^{13}\text{C}\{^1\text{H}\}$ NMR spectra of borylated products .....                         | S68  |
| Figure. X-Ray structure of Table 1, entry 4.....                                                                                          | S126 |
| Figure. X-Ray packing structure of Table 1, entry 4 .....                                                                                 | S127 |
| Figure. X-Ray structure of Table 1, entry 7.....                                                                                          | S128 |
| Figure. X-Ray packing structure of Table 1, entry 7 .....                                                                                 | S129 |
| Figure. X-Ray structure of Table 1, entry 8.....                                                                                          | S130 |
| Figure. X-Ray packing structure of Table 1, entry 8 .....                                                                                 | S131 |
| Figure. X-Ray structure of Table 1, entry 9.....                                                                                          | S132 |
| Figure. X-Ray packing structure of Table 1, entry 9 .....                                                                                 | S133 |
| Theoretical Methods .....                                                                                                                 | S134 |
| General.....                                                                                                                              | S134 |
| Choice of Methods and Method Details .....                                                                                                | S134 |
| Some Complications in the Calculations .....                                                                                              | S134 |
| Calculated Structures .....                                                                                                               | S135 |
| bybpin3BOCmetaA.....                                                                                                                      | S135 |
| bybpin3BOCmetaB.....                                                                                                                      | S137 |
| bybpin3BOCmetaC.....                                                                                                                      | S139 |
| bybpin3BOCmetaD.....                                                                                                                      | S141 |
| bybpin3BOCorthoA.....                                                                                                                     | S143 |
| bybpin3BOCorthoB .....                                                                                                                    | S145 |
| bybpin3BOCorthoC .....                                                                                                                    | S147 |
| bybpin3BOCpara .....                                                                                                                      | S150 |
| bybpin3BOCparaB.....                                                                                                                      | S152 |
| Irbpy_Bpin3 .....                                                                                                                         | S157 |

|                            |    |
|----------------------------|----|
| Irbpy_Bpin3 Isomer B ..... | 27 |
| References.....            | 28 |

## General Information

All commercially available chemicals were used as received unless otherwise indicated. Pinacolborane (HBPin) and bis(pinacolato)diboron ( $B_2Pin_2$ ) were generously supplied by BASF. Bis( $\eta^4$ -1,5-cyclooctadiene)-di- $\mu$ -methoxy-diiridium(I)  $[Ir(OMe)COD]_2$  was prepared per literature procedure.<sup>1</sup> Methyl *tert*-butylether (MTBE), tetrahydrofuran (THF) and diethyl ether were refluxed over sodium/benzophenone ketyl, distilled and degassed. Column chromatography was performed on Silia P-Flash silica gel. Thin layer chromatography was performed on 0.25 mm thick aluminum-backed silica gel plates purchased from Silicycle and visualized with ultraviolet light ( $\lambda = 254$  nm). Sublimations were conducted with a water-cooled cold finger.

$^1H$  and  $^{13}C$  NMR spectra were recorded on an Inova-600 spectrometer (599.81 and 150.84 MHz respectively), Varian VXR-500 spectrometer (499.96 and 125.73 MHz respectively), Varian UnityPlus-500 spectrometer (499.74 and 125.67 MHz respectively) or Varian VXR-300 spectrometer (300.11 and 75.47 MHz respectively) and referenced to residual solvent signals.  $^{11}B$  and  $^{19}F$  spectra were recorded on an Inova-600 spectrometer (192.45 MHz for  $^{11}B$ ), Varian UnityPlus-500 spectrometer (160.34 MHz for  $^{11}B$ ) or a Varian VXR-300 spectrometer (96.18 MHz and 282.08 MHz respectively) and were referenced to either neat boron trifluoride etherate ( $BF_3 \cdot OEt_2$ ) or neat trichlorofluoromethane ( $CFCl_3$ ) as the external standard. The boron bearing carbon atom was not observed due to quadrupolar relaxation. All coupling constants are apparent  $J$  values measured at the indicated field strengths in Hertz (s = singlet, d = doublet, t = triplet, q = quartet, dd = doublet of doublets, bs = broad singlet). High-resolution mass spectra (HRMS) were obtained at the Michigan State University Mass Spectrometry Service Center using a Waters GCT Premier instrument run on electron ionization (EI) direct probe or a Waters QTOF Ultima instrument run on electrospray ionization (ESI+).<sup>2</sup> Infrared spectroscopy was obtained at Michigan State University using an FT-IR Mattson spectrometer. Melting points were measured on a MEL-TEMP<sup>®</sup> capillary melting apparatus and stand uncorrected.

### General Procedure for preparing *N*-*t*-Boc protected anilines<sup>3</sup>

A flask was charged with a stir bar, substrate, 1 mL water per 1 mmol substrate and *t*-Boc<sub>2</sub>O. After stirring for the given time, ethyl acetate and 1,4-dioxane were added and the solution was acidified with saturated KHSO<sub>4</sub> in water at 0 °C. After extracting three times with ethyl acetate, the organic phase was washed with concentrated brine, dried over MgSO<sub>4</sub> and concentrated in vacuo. This solid was loaded onto a filter frit and washed three times with a minimal amount of cold hexanes. The remaining solid was dried under high vacuum.

#### Preparation of *N,N*-di-(*tert*-butoxycarbonyl)-3-chloroaniline (**6**)

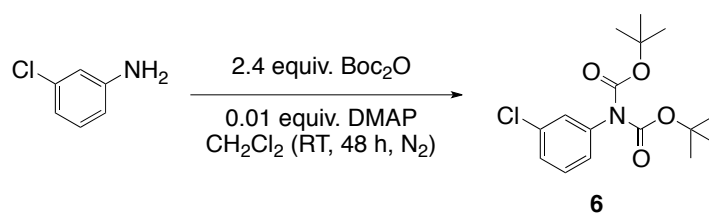

A solution containing 2.01 g (15.8 mmol) 3-chloroaniline, 19 mg (0.2 mmol) *N,N*-dimethyl-4-aminopyridine and 8.24 g (37.8 mmol) *t*-Boc<sub>2</sub>O in 10 mL dichloromethane was stirred via magnetic stirbar. After 48 hours, the solution was mixed with 1,4-dioxane, acidified with saturated KHSO<sub>4</sub> in water at 0 °C, extracted with dichloromethane, washed with saturated brine, dried over MgSO<sub>4</sub> and filtered. The volatiles were evaporated in vacuo to afford a colorless oil. Once this oil crystallized, residual *t*-Boc<sub>2</sub>O was sublimed out (0.02 mmHg, 25 °C). Then the solid was further sublimed (0.02 mmHg, 50 °C) to afford 2.80 g **6** as white needles (55% yield, mp = 76 °C).

<sup>1</sup>H NMR (500 MHz, CDCl<sub>3</sub> = 7.24 ppm): δ 7.27–7.24 (m, 2H), 7.15–7.14 (m, 1H), 7.03–7.01 (m, 1H), 1.41 (s, 18H); <sup>13</sup>C NMR (126 MHz, CDCl<sub>3</sub> = 77 ppm): δ 151.43, 140.39, 133.98, 129.53, 128.37, 127.62, 126.30, 83.10, 27.88; FT-IR (thin film): 3000, 2974, 2944, 2880, 1735, 1702, 1586, 1475, 1366, 1273, 1239, 1160, 1125, 1075, 1044, 1023, 876, 842, 806, 773, cm<sup>-1</sup>; HRMS calcd. for C<sub>16</sub>H<sub>22</sub>ClNO<sub>4</sub> [M]<sup>+</sup> 327.1237, found 327.1239.

#### Preparation of *N*-(*tert*-butoxycarbonyl)-3-chloroaniline (**7**)

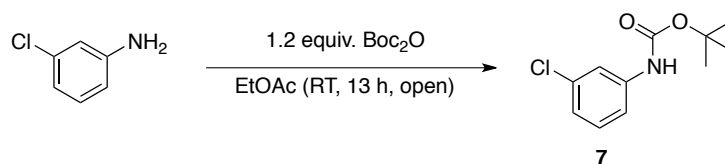

A solution of 10.00 g (78.4 mmol) 3-chloroaniline and 20.53 g (94.1 mmol) *t*-Boc<sub>2</sub>O in 15 mL ethyl acetate was stirred by magnetic stirbar open to air. All volatiles were removed after 13 hours to provide a pink solid that was washed three times with hexanes. The solid was collected and the procedure repeated on the filtrate. This provided 16.50 g **7** as a white solid (93% yield, mp = 82-84 °C, lit mp = 83 °C<sup>4</sup>).

<sup>1</sup>H NMR (500 MHz, CDCl<sub>3</sub> = 7.24 ppm): δ 7.50 (s, 1H), 7.18–7.12 (m, 2H), 6.99–6.96 (m, 1H), 6.54 (bs, 1H), 1.50 (s, 9H); <sup>13</sup>C NMR (126 MHz, CDCl<sub>3</sub> = 77 ppm): δ 152.42, 139.56, 134.69, 129.85, 122.97, 118.51, 116.39, 80.96, 28.25; FT-IR (thin film): 3320, 2978, 1709, 1603, 1537, 1480, 1449, 1426, 1404, 1390, 1287, 1244, 1159, 1078, 1059, 853, 772, 739, 691, 681 cm<sup>-1</sup>; HRMS calcd. for C<sub>11</sub>H<sub>14</sub>ClNO<sub>2</sub> [M]<sup>+</sup> 227.0713, found 227.0715.

### Preparation of *N*-(*tert*-butoxycarbonyl)-4-chloroaniline

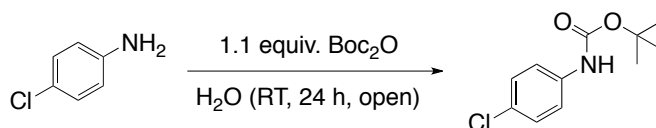

The general procedure was applied using 5.00 g (39.2 mmol) 4-chloroaniline, 40 mL water and 9.41 g (43.1 mmol) *t*-Boc<sub>2</sub>O for 24 hours to provide 6.56 g *N*-(*tert*-butoxycarbonyl)-4-chloroaniline as a white solid (74% yield, mp = 98-100 °C, lit mp = 105-106 °C<sup>4</sup>). The hexane washings were concentrated to approximately 5 mL and cooled to -30 °C to yield 1.60 g *N*-(*tert*-butoxycarbonyl)-4-chloroaniline as white needles (18% yield, mp = 98 °C, lit mp = 105-106 °C<sup>4</sup>; combined crops = 8.16 g, 91% yield).

<sup>1</sup>H NMR (500 MHz, CDCl<sub>3</sub> = 7.24 ppm): δ 7.28 (d, <sup>3</sup>J = 8.8 Hz, 2H), 7.22 (d, <sup>3</sup>J = 9.0 Hz, 2H), 6.47 (bs, 1H), 1.49 (s, 9H); <sup>13</sup>C NMR (126 MHz, CDCl<sub>3</sub> = 77 ppm): δ 152.56, 136.95, 128.92, 127.94, 119.71, 80.84, 28.29; FT-IR (thin film): 3366, 2988, 1696, 1591, 1522, 1495, 1451, 1401, 1364, 1306, 1269, 1240, 1179, 1165, 818, 772, 758, 617 cm<sup>-1</sup>; HRMS calcd. for C<sub>11</sub>H<sub>14</sub>ClNO<sub>2</sub> [M]<sup>+</sup> 227.0713, found 227.0719.

### Preparation of *N*-(*tert*-butoxycarbonyl)-4-bromoaniline

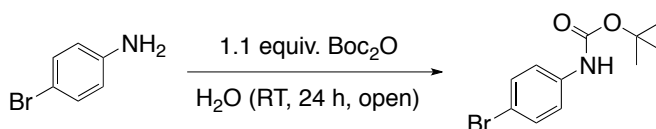

The general procedure was applied using 3.46 g (20.1 mmol) 4-bromoaniline, 22 mL water and 4.85 g (22.2 mmol) t-Boc<sub>2</sub>O for 24 hours to provide 5.40 g *N*-(*tert*-butoxycarbonyl)-4-bromoaniline as a white solid (98% yield, mp = 104 °C, lit mp = 102 °C<sup>3</sup>).

<sup>1</sup>H NMR (500 MHz, CDCl<sub>3</sub> = 7.24 ppm): δ 7.35 (d, <sup>3</sup>J = 8.8 Hz, 2H), 7.23 (d, <sup>3</sup>J = 9.0 Hz, 2H), 6.56 (bs, 1H), 1.49 (s, 9H); <sup>13</sup>C NMR (126 MHz, CDCl<sub>3</sub> = 77 ppm): δ 152.52, 137.46, 131.80, 120.06, 115.37, 80.82, 28.26; FT-IR (thin film): 3367, 3000, 2982, 2933, 2899, 1695, 1591, 1520, 1491, 1413, 1394, 1366, 1306, 1267, 1238, 1178, 1160, 1070, 1055, 1008, 815, 763, 631, 613 cm<sup>-1</sup>; HRMS calcd. for C<sub>11</sub>H<sub>14</sub>BrNO<sub>2</sub> [M]<sup>+</sup> 271.0208, found 271.0211.

#### Preparation of *N*-(*tert*-butoxycarbonyl)-4-chloro-3-fluoroaniline

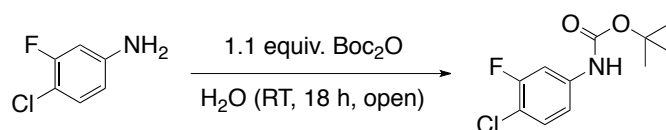

The general procedure was applied using 3.00 g (20.6 mmol) 4-chloro-3-fluoroaniline, 20 mL water and 4.95 g (22.7 mmol) t-Boc<sub>2</sub>O for 18 hours to provide 4.87 g *N*-(*tert*-butoxycarbonyl)-4-chloro-3-fluoroaniline as a white solid (97% yield, mp = 98-100 °C, lit mp = 103-104 °C<sup>5</sup>).

<sup>1</sup>H NMR (500 MHz, CDCl<sub>3</sub> = 7.24 ppm): δ 7.41 (d, *J*<sub>H-F</sub> = 9.5 Hz, 1H), 7.25–7.22 (m, 1H), 6.93–6.91 (m, 1H), 6.51 (bs, 1H), 1.50 (s, 9H); <sup>13</sup>C NMR (126 MHz, CDCl<sub>3</sub> = 77 ppm): δ 158.18 (d, <sup>1</sup>J<sub>C-F</sub> = 246.7), 152.24 (s), 138.54 (s), 138.46 (s), 130.38 (s), 114.39 (s), 107.01 (d, <sup>2</sup>J<sub>C-F</sub> = 26.2), 81.30 (s), 28.24 (s); <sup>19</sup>F NMR (282 MHz, CDCl<sub>3</sub>, CFC<sub>3</sub> = 0 ppm): δ -113.74 (dd, <sup>3</sup>J<sub>F-H</sub> = 10.7, <sup>4</sup>J<sub>F-H</sub> = 7.6); FT-IR (thin film): 3431, 3325, 3098, 2981, 2936, 1724, 1598, 1524, 1499, 1426, 1407, 1394, 1368, 1281, 1236, 1151, 1068, 1027, 977, 948, 867, 811, 722, 728, 666, 611, 554, 450, 429, 419 cm<sup>-1</sup>; HRMS calcd. for C<sub>11</sub>H<sub>13</sub>ClFNO<sub>2</sub> [M]<sup>+</sup> 245.0619, found 245.0625.

#### Preparation of *N*-(*tert*-butoxycarbonyl)-4-fluoro-3-methylaniline

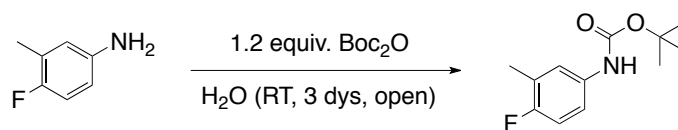

The general procedure was applied using 10.00 g (80 mmol) 4-fluoro-3-methylaniline, 85 mL water and 20.93 g (96 mmol) t-Boc<sub>2</sub>O for 3 days to provide 16.76 g *N*-(*tert*-butoxycarbonyl)-4-fluoro-3-methylaniline as a fluffy white solid (93% yield, mp = 76-78 °C). TLC analysis with dichloromethane as the eluent (*R*<sub>f</sub> = 0.68) showed complete conversion of 4-fluoro-3-methylaniline after 3 hours.

$^1\text{H}$  NMR (500 MHz,  $\text{CDCl}_3 = 7.24$  ppm):  $\delta$  7.23 (s, 1H), 7.05–7.02 (m, 1H), 6.88 (t,  $^3J = 9.0$  Hz, 1H), 6.34 (s, 1H), 2.22 (d,  $^4J_{\text{H-F}} = 2.0$  Hz, 3H), 1.49 (s, 9H);  $^{13}\text{C}$  NMR (126 MHz,  $\text{CDCl}_3 = 77$  ppm):  $\delta$  157.35 (d,  $^1J_{\text{C-F}} = 240.2$ ), 152.94 (s), 133.90 (d,  $^3J_{\text{C-F}} = 2.6$ ), 125.23 (d,  $^2J_{\text{C-F}} = 18.6$ ), 121.74 (s), 117.54 (s), 115.06 (d,  $^2J_{\text{C-F}} = 23.8$ ), 80.48 (s), 28.31 (s), 14.63 (d,  $^3J_{\text{C-F}} = 3.6$ );  $^{19}\text{F}$  NMR (282 MHz,  $\text{CFCl}_3 = 0$  ppm):  $\delta$  -124.59; FT-IR (thin film): 3322, 3079, 2978, 2932, 1698, 1623, 1603, 1531, 1506, 1454, 1412, 1368, 1315, 1283, 1243, 1214, 1153, 1114, 1018, 1031, 1004, 884, 816, 771, 764  $\text{cm}^{-1}$ ; HRMS calcd. for  $\text{C}_{12}\text{H}_{16}\text{FNO}_2$   $[\text{M}]^+$  225.1165, found 225.1169.

### Preparation of *N*-(*tert*-butoxycarbonyl)-2-chloro-4-aminoanisole

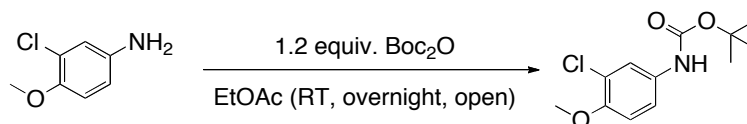

A solution of 4.00 g (25.3 mmol) 3-chloro-4-methoxyaniline and 6.62 g (30.3 mmol) *t*-Boc<sub>2</sub>O in ethyl acetate was stirred overnight. All volatiles were removed in vacuo to provide an off-white solid. The collected product was loaded onto a filter frit and washed three times with hexanes to provide 5.64 g *N*-(*tert*-butoxycarbonyl)-2-chloro-4-aminoanisole as a white solid (86% yield, mp = 88–90 °C).

$^1\text{H}$  NMR (500 MHz,  $\text{CDCl}_3 = 7.24$  ppm):  $\delta$  7.44 (s, 1H), 7.15 (d,  $^3J = 7.3$  Hz, 1H), 6.82 (d,  $^3J = 9.0$  Hz, 1H), 6.36 (bs, 1H), 3.83 (s, 3H), 1.48 (s, 9H);  $^{13}\text{C}$  NMR (126 MHz,  $\text{CDCl}_3 = 77$  ppm):  $\delta$  152.83, 151.11, 132.03, 122.65, 121.31, 118.23, 112.46, 80.64, 56.45, 28.31; FT-IR (thin film): 3328, 3002, 2978, 2934, 2841, 1698, 1590, 1502, 1454, 1442, 1393, 1367, 1279, 1255, 1239, 1161, 1062, 1023, 937, 836, 809, 735  $\text{cm}^{-1}$ ; HRMS calcd. for  $\text{C}_{12}\text{H}_{16}\text{ClNO}_3$   $[\text{M}]^+$  257.0819, found 257.0816.

### Preparation of *N*-(*tert*-butoxycarbonyl)-4-trifluoromethylaniline<sup>6</sup>

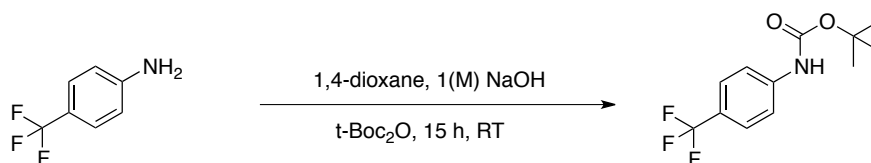

The literature procedure was followed as described.<sup>7</sup> A flask was charged with a stirbar, 0.97 g (6.0 mmol) 4-trifluoromethylaniline and 6 mL 1,4-dioxane. Upon mixing, 6 mL 1M NaOH in water was added to the flask. After the addition of 1.31 g (6.0 mmol) *t*-Boc<sub>2</sub>O the mixture was stirred at room temperature for 15 hours. The contents were poured into water and extracted with ethyl acetate. The organic layer was washed with saturated brine, dried over  $\text{Na}_2\text{SO}_4$  and



volatiles removed in vacuo. The obtained solid was loaded onto a filter frit and washed with hexanes to provide 0.58 g *N*-(*tert*-butoxycarbonyl)-4-trifluoromethylaniline as a white fluffy solid (37% yield, mp = 118-120 °C, lit mp = 115-117 °C<sup>7</sup>).

<sup>1</sup>H NMR (500 MHz, CDCl<sub>3</sub> = 7.24 ppm): δ 7.51 (d, <sup>3</sup>*J* = 8.8 Hz, 2H), 7.45 (d, <sup>3</sup>*J* = 8.8 Hz, 2H), 6.64 (bs, 1H), 1.51 (s, 9H); <sup>13</sup>C NMR (126 MHz, CDCl<sub>3</sub> = 77 ppm): δ 152.29 (s), 141.53 (d, <sup>4</sup>*J*<sub>C-F</sub> = 1.4), 126.25 (q, <sup>3</sup>*J*<sub>C-F</sub> = 3.7), 124.81 (q, <sup>2</sup>*J*<sub>C-F</sub> = 32.7), 124.23 (q, <sup>1</sup>*J*<sub>C-F</sub> = 271.1), 117.88 (s), 81.27 (s), 28.25 (s); <sup>19</sup>F NMR (282 MHz, CDCl<sub>3</sub>, CFC<sub>3</sub> = 0 ppm): δ -62.10; FT-IR (thin film): 3364, 3012, 2986, 2940, 1703, 1617, 1596, 1528, 1507, 1445, 1410, 1395, 1372, 1334, 1317, 1274, 1237, 1158, 1108, 1071, 1024, 1016, 905, 838, 767, 632, 614, 505, 464 cm<sup>-1</sup>; HRMS calcd. for C<sub>12</sub>H<sub>14</sub>F<sub>3</sub>NO<sub>2</sub> [M]<sup>+</sup> 261.0977, found 261.0978.

### Preparation of *N*-(*tert*-butoxycarbonyl)-2-chloro-4-aminophenol

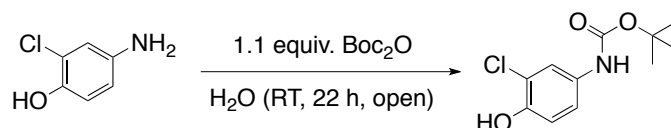

The general procedure was applied using 5.00 g (34.8 mmol) 2-chloro-4-aminophenol, 40 mL water and 8.40 g (38.5 mmol) *t*-Boc<sub>2</sub>O for 22 hours to provide 7.98 g *N*-(*tert*-butoxycarbonyl)-2-chloro-4-aminophenol as a white solid (99% yield, mp = 90-92 °C, lit mp = 77-79 °C<sup>8</sup>).

<sup>1</sup>H NMR (500 MHz, CDCl<sub>3</sub> = 7.24 ppm): δ 7.51, (s, 1H), 6.99 (dd, <sup>3</sup>*J* = 8.6 Hz, <sup>4</sup>*J* = 2.4 Hz, 1H), 6.89 (d, <sup>3</sup>*J* = 8.8 Hz, 1H), 6.35 (bs, 1H), 5.40, (s, 1H), 1.49 (s, 9H); <sup>13</sup>C NMR (126 MHz, CDCl<sub>3</sub> = 77 ppm): δ 152.91, 147.40, 131.82, 119.91, 119.39, 116.16, 80.75, 28.31; FT-IR (thin film): 3341, 3038, 2979, 2934, 1692, 1596, 1515, 1455, 1413, 1394, 1368, 1280, 1241, 1147, 1060, 1015, 938, 871, 816, 774, 746, 689, 588 cm<sup>-1</sup>; HRMS calcd. for C<sub>11</sub>H<sub>14</sub>ClNO<sub>2</sub> [M]<sup>+</sup> 243.0662, found 243.0669.

### Preparation of *N*-(*tert*-butoxycarbonyl)-4-aminobenzonitrile

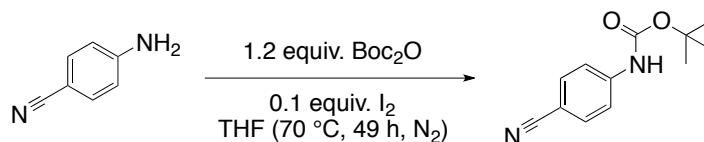

A modified literature procedure was followed.<sup>9</sup> A solution of 4.91 g (42.5 mmol) 4-aminobenzonitrile, 1.05 g (4.2 mmol) I<sub>2</sub> and 10.87 g (49.8 mmol) *t*-Boc<sub>2</sub>O in 6 mL THF was stirred for 49 hours at 70 °C under N<sub>2</sub>. After the addition of an additional 9.06 g (42.5mmol) *t*-Boc<sub>2</sub>O and a total of 4 days at 70 °C under N<sub>2</sub> the contents were diluted with diethyl ether. The

organic layer was washed with saturated Na<sub>2</sub>S<sub>2</sub>O<sub>3</sub> in water, washed twice with 2M HCl in water, washed with saturated brine, dried over MgSO<sub>4</sub> and all volatiles removed in vacuo to provide a yellow liquid. After the addition of 20 mL 1 : 1 (diethyl ether / pentane) all volatiles were removed to afford a yellow solid. This crude solid was loaded onto a filter frit and washed extensively with pentane to provide a yellow-tinged solid (mp = 106-112 °C, lit mp = 120-120.5 °C<sup>10</sup>). The yellow-tinged solid was sublimed (120 °C, 0.001 mmHg) to afford 4.20 g *N*-(*tert*-butoxycarbonyl)-4-aminobenzonitrile as a white solid (46% yield, mp = 116-118 °C, lit mp = 120-120.5 °C<sup>10</sup>). This solid was then passed through a pad of silica-gel with dichloromethane as the eluent to yield 3.5 g *N*-(*tert*-butoxycarbonyl)-4-aminobenzonitrile a white solid (38% yield, mp = 118-120 °C, lit mp = 120-120.5 °C<sup>10</sup>, R<sub>f</sub> = 0.53).

<sup>1</sup>H NMR (600 MHz, CDCl<sub>3</sub> = 7.24 ppm): δ 7.55 (d, <sup>3</sup>J = 8.8 Hz, 2H), 7.46 (d, <sup>3</sup>J = 8.8 Hz, 2H), 6.67 (bs, 1H), 1.50 (s, 9H); <sup>13</sup>C NMR (151 MHz, CDCl<sub>3</sub> = 77 ppm): δ 151.90, 142.53, 133.29, 119.01, 118.06, 105.81, 81.71, 28.21; FT-IR (thin film): 3328, 2979, 2933, 2225, 1732, 1710, 1607, 1590, 1523, 1411, 1370, 1318, 1233, 1156, 1056, 1027, 900, 838, 772, 701 cm<sup>-1</sup>; HRMS calcd. for C<sub>12</sub>H<sub>14</sub>N<sub>2</sub>O<sub>2</sub> [M]<sup>+</sup> 218.1055, found 218.1053.

#### Preparation of *N*-(*tert*-butoxycarbonyl)-*N*-methyl-3-chloroaniline (**12a**)

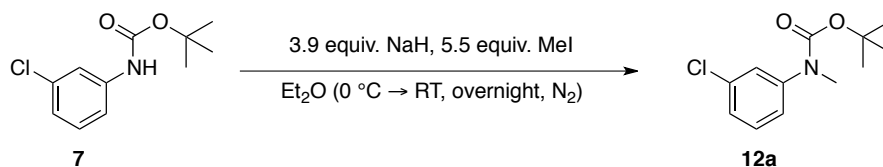

A flask was charged with a stirbar, 5 mL diethyl ether and 380 mg (1.7 mmol) **7** and cooled to 0 °C under a N<sub>2</sub> atmosphere. The contents were stirred during the slow addition of 160 mg (6.7 mmol) NaH powder. Once no more gas evolution was observed 0.6 mL (9.4 mmol) methyl iodide was added and the contents stirred at room temperature overnight. The reaction was quenched with saturated NH<sub>4</sub>Cl in water, extracted with diethyl ether, the organic layer washed with brine, dried over MgSO<sub>4</sub> and concentrated in vacuo. After column chromatography with dichloromethane as the eluent (R<sub>f</sub> = 0.65) the obtained liquid was taken into the glovebox and passed through a short pad of activated neutral alumina with diethyl ether to afford 400 mg **12a** as a colorless liquid (99% yield).

<sup>1</sup>H NMR (500 MHz, CDCl<sub>3</sub> = 7.24 ppm): δ 7.25–7.21 (m, 2H), 7.13–7.11 (m, 2H), 3.23 (s, 3H), 1.44 (s, 9H); <sup>13</sup>C NMR (126 MHz, CDCl<sub>3</sub> = 77 ppm): δ 154.36, 144.97, 133.94, 129.42, 125.64,

125.37, 123.49, 80.79, 37.12, 28.29; FT-IR (thin film): 3057, 2975, 2927, 2855, 1705, 1615, 1594, 1577, 1482, 1457, 1434, 1391, 1364, 1352, 1305, 1253, 1153, 1120, 1091, 985, 865, 824, 777, 725, 694, 587, 418  $\text{cm}^{-1}$ ; HRMS calcd. for  $\text{C}_{12}\text{H}_{16}\text{ClNO}_2$   $[\text{M}]^+$  241.0870, found 241.0870.

### Preparation of 3-chlorophenyl *tert*-butylcarbamate (**12b**)

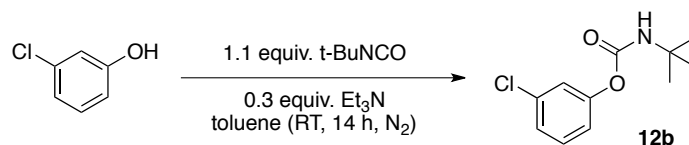

A solution containing 3.00 g (23.3 mmol) 3-chlorophenol, 2.8 mL (25.0 mmol) *tert*-butyl isocyanate and 1 mL (7.2 mmol) triethylamine in 10 mL toluene was stirred via magnetic stirbar at room temperature under a  $\text{N}_2$  atmosphere. After 14 hours all volatiles were removed in vacuo and the remaining solid loaded onto a filter frit and washed with hexanes to afford 4.81 g **12b** as a white solid (92% yield, mp = 96 °C).

$^1\text{H}$  NMR (500 MHz,  $\text{CDCl}_3$  = 7.24 ppm):  $\delta$  7.27–7.24 (m, 2H), 7.15–7.14 (m, 1H), 7.03–7.01 (m, 1H), 5.01 (bs, 1H), 1.41 (s, 9H);  $^{13}\text{C}$  NMR (126 MHz,  $\text{CDCl}_3$  = 77 ppm):  $\delta$  151.43, 140.39, 133.98, 129.53, 128.37, 127.62, 126.30, 83.10, 27.88; FT-IR (thin film): 3331, 3068, 3035, 3006, 2967, 2934, 2907, 2875, 1718, 1588, 1537, 1475, 1458, 1427, 1393, 1366, 1279, 1258, 1212, 1152, 1087, 1068, 1050, 1022, 1000, 927, 897, 881, 867, 793, 769, 689, 673, 650, 559, 460, 440  $\text{cm}^{-1}$ ; HRMS calcd. for  $\text{C}_{11}\text{H}_{14}\text{ClNO}_4$   $[\text{M}]^+$  227.0713, found 227.0719.

### Preparation of *N*-(3-chlorophenyl)-3,3-dimethylbutanamide (**12c**)

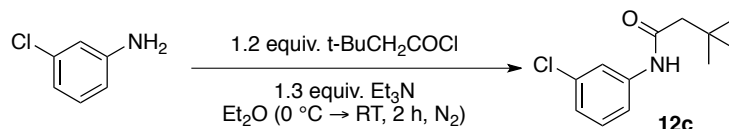

A stirring solution of 1.57 g (12.3 mmol) 3-chloroaniline and 2.2 mL (15.8 mmol) triethylamine in 30 mL diethyl ether at 0 °C was prepared under a  $\text{N}_2$  atmosphere. The addition of 2.0 mL (14.4 mmol) 3,3-dimethylbutyryl chloride via syringe was done dropwise. After 2 hours at room temperature, the contents were poured into 10 mL water and the solution extracted three times with diethyl ether, washed with saturated brine, dried over  $\text{MgSO}_4$  and evaporated in vacuo. The off-white solid was loaded onto a filter frit and washed three times with hexanes to afford 2.66 g **12c** as a white solid (96% yield, mp = 110–112 °C).

$^1\text{H}$  NMR (500 MHz,  $\text{CDCl}_3$  = 7.24 ppm):  $\delta$  7.64 (bs, 1H), 7.61 (s, 1H), 7.31 (d,  $^3J = 7.3$  Hz, 1H), 7.16 (t,  $^3J = 8.1$  Hz, 1H), 7.02 (d,  $^3J = 7.8$  Hz, 1H), 2.19 (s, 2H), 1.06 (s, 9H);  $^{13}\text{C}$  NMR (126

MHz, CDCl<sub>3</sub> = 77 ppm):  $\delta$  170.57, 139.01, 134.47, 129.81, 124.20, 120.22, 118.07, 51.31, 31.30, 29.74; FT-IR (thin film): 3280, 3249, 3182, 3118, 3072, 2962, 2925, 2900, 2867, 1656, 1590, 1532, 1442, 1417, 1367, 1333, 1268, 1253, 1235, 1200, 1133, 1092, 1077, 998, 925, 869, 792, 751, 688, 542, 430 cm<sup>-1</sup>; HRMS calcd. for C<sub>12</sub>H<sub>16</sub>ClNO [M]<sup>+</sup> 225.0920, found 225.0918.

### Preparation of *N*-(*tert*-butoxycarbonyl)-*N*-deuterio-3-chloroaniline (**7-d<sub>1</sub>**)

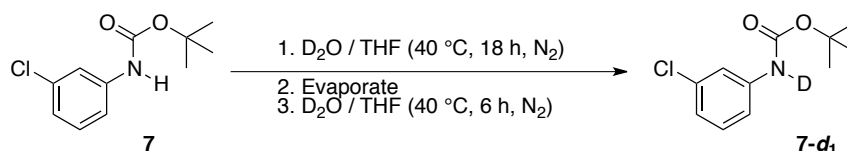

A 100 mL Schlenk flask was washed with D<sub>2</sub>O and evaporated under N<sub>2</sub> flow prior to use. The flask was charged with a stir bar, 2.04 g (8.8 mmol) **7**, 5 mL D<sub>2</sub>O and 5 mL THF, then heated to 40 °C. After 18 hours of stirring all volatiles were removed under N<sub>2</sub> flow at 90 °C. The white solid was redissolved in 5 mL D<sub>2</sub>O and 5 mL THF and stirred at 40 °C for an additional 6 hours. All volatiles were removed under N<sub>2</sub> flow at 90 °C. The remaining solid was sublimed (0.005 mmHg, 70 °C) to the side of the flask. The solid was scraped onto a filter frit in the glovebox, washed with a minimal amount of pentane and dried to afford 1.63 g **7-d<sub>1</sub>** as a white solid (80% yield, >98% D-incorporation by NMR, mp = 82-84 °C).

<sup>1</sup>H NMR (500 MHz, CDCl<sub>3</sub> = 7.24 ppm):  $\delta$  7.50 (s, 1H), 7.18–7.12 (m, 2H), 6.99–6.97 (m, 1H), 1.50 (s, 9H); <sup>13</sup>C NMR (126 MHz, CDCl<sub>3</sub> = 77 ppm):  $\delta$  152.56, 139.46, 134.72, 129.88, 122.97, 118.39, 116.26, 80.99, 28.27; FT-IR (neat): 2979, 2931, 2432, 1694, 1600, 1576, 1486, 1453, 1397, 1369, 1299, 1247, 1167, 1101, 1079, 1063, 1037, 998, 905, 852, 773, 708, 681 cm<sup>-1</sup>; HRMS calcd. for C<sub>11</sub><sup>1</sup>H<sub>13</sub><sup>2</sup>HCINO<sub>2</sub> [M]<sup>+</sup> 228.0776, found 228.0780.

### Preparation of *O*-(*N,N'*-dimethylcarbamoyl)-*N*-(*tert*-butoxycarbonyl)-4-aminophenol<sup>6</sup>

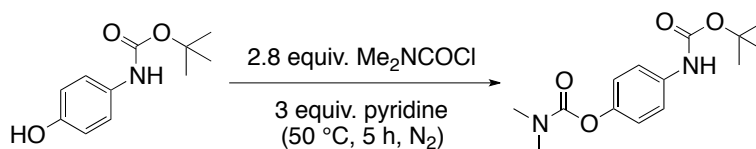

A flask was charged with a stirbar, 1.51 g (7.2 mmol) *N*-(*tert*-butoxycarbonyl)-4-aminophenol and 1.7 mL (21.6 mmol) pyridine under a N<sub>2</sub> atmosphere. After the addition of 1.9 mL (20.2 mmol) *N,N*-dimethylcarbamoyl chloride the mixture was heated at 50 °C for 5 hours. The contents were diluted with ethyl acetate, washed with 1M HCl in water and the organic layer dried over MgSO<sub>4</sub>. Crystallization from 3 : 1 (ethyl acetate / hexanes) afforded 1.33 g *O*-(*N,N'*-

dimethylcarbamoyl)-*N*-(*tert*-butoxycarbonyl)-4-aminophenol as a white solid (66% yield, mp = 178-180 °C).

<sup>1</sup>H NMR (500 MHz, CDCl<sub>3</sub> = 7.24 ppm): δ 7.29 (d, <sup>3</sup>*J* = 8.6 Hz, 2H), 6.99 (d, <sup>3</sup>*J* = 8.8 Hz, 2H), 6.56 (bs, 1H), 3.06 (s, 3H), 2.98 (s, 3H), 1.49 (s, 9H); <sup>13</sup>C NMR (126 MHz, CDCl<sub>3</sub> = 77 ppm): δ 155.09, 152.79, 146.87, 135.48, 122.07, 119.37, 80.39, 36.68, 36.39, 28.32; FT-IR (thin film): 3297, 3131, 3053, 2979, 2932, 1706, 1606, 1535, 1513, 1490, 1458, 1407, 1369, 1309, 1239, 1207, 1163, 1108, 1050, 1017, 873, 873, 825, 757, 746, 694, 600, 525 cm<sup>-1</sup>; HRMS calcd. for C<sub>14</sub>H<sub>20</sub>N<sub>2</sub>O<sub>4</sub> [M]<sup>+</sup> 280.1423, found 280.1429.

### Preparation of *O*-(*N,N'*-dimethylcarbamoyl)-*N*-(*tert*-butoxycarbonyl)-2-chloro-4-aminophenol<sup>6</sup>

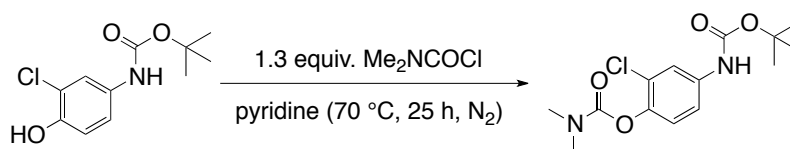

A flask was charged with a stirbar and 2.00 g (8.2 mmol) *N*-(*tert*-butoxycarbonyl)-2-chloro-4-aminophenol in pyridine under a N<sub>2</sub> atmosphere. After the addition of 1.0 mL (10.7 mmol) *N,N*-dimethylcarbamoyl chloride the mixture was heated at 70 °C for 25 hours. The contents were diluted with ethyl acetate, washed with 1M HCl in water and the organic layer dried over MgSO<sub>4</sub>. Impurities were removed by washing the product with hexanes to afford 1.94 g *O*-(*N,N'*-dimethylcarbamoyl)-*N*-(*tert*-butoxycarbonyl)-2-chloro-4-aminophenol as a white solid (75% yield, mp = 162 °C).

<sup>1</sup>H NMR (500 MHz, CDCl<sub>3</sub> = 7.24 ppm): δ 7.50 (s, 1H), 7.02–6.96 (m, 3H), 3.10 (s, 3H), 3.00 (s, 3H), 1.47 (s, 9H); <sup>13</sup>C NMR (126 MHz, CDCl<sub>3</sub> = 77 ppm): δ 154.26, 152.63, 142.49, 136.75, 126.98, 123.75, 119.82, 117.56, 80.44, 36.81, 36.46, 28.23; FT-IR (thin film): 3429, 3321, 3055, 2986, 1718, 1606, 1518, 1456, 1392, 1265, 1209, 1155, 1059, 910, 875, 823, 740, 706 cm<sup>-1</sup>; HRMS(ESI<sup>+</sup>) calcd. for C<sub>14</sub>H<sub>19</sub>ClN<sub>2</sub>O<sub>4</sub> [M+H]<sup>+</sup> 315.1115, found 315.1118.

**Preparation of Enamine 20:** This compound was prepared according to the previously reported procedure.<sup>11</sup>

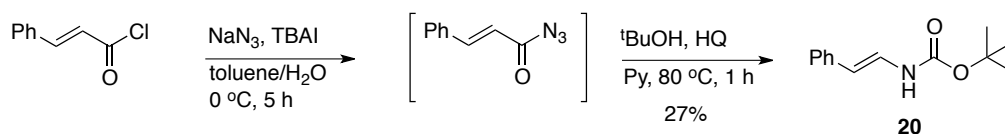

### Preparation of *o*-bromo-, *m*-bromo- and *p*-bromo-phenyl carbamic acid methyl esters

These compounds were prepared according to the previously reported procedure.<sup>12,13,14</sup>

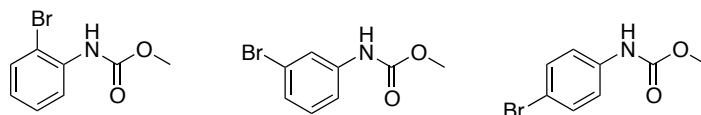

### Preparation of methyl 2-(4,4,5,5-tetramethyl-1,3,2-dioxaborolan-2-yl) phenylcarbamate:

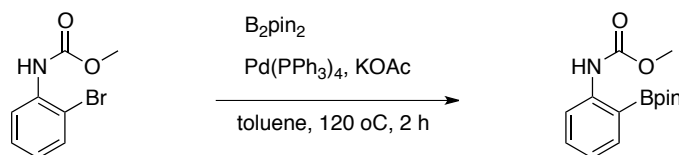

To a degassed solution of 2-bromophenyl carbamic acid methyl ester (0.5 g, 2.17 mmol), bis(pinacolate)diborane (1.104 g, 4.34 mmol), and potassium acetate (0.646 g, 6.52 mmol) in toluene (22 mL) was added tetrakis(triphenyl)phosphine palladium (0.0678 g, 2.7 mol%). The reaction mixture was immediately heated to 120° C for 2 hours, and subsequently cooled to room temperature. After cooling, the reaction mixture was washed with H<sub>2</sub>O and brine, dried over MgSO<sub>4</sub>, filtered and concentrated. The remaining residue (1.11 g) was purified by flash chromatography (95% hexane, 5% EtOAc) to give methyl 2-(4,4,5,5-tetramethyl-1,3,2-dioxaborolan-2-yl)phenylcarbamate as a white powder. Two main fractions of product were obtained, one pure (268 mg, 44.5% yield) and one impure (283 mg) containing 59 mg (9.8% yield). Overall yield: 342 mg, 54.3% [mp = 113°C];

<sup>1</sup>HNMR (500 MHz, CDCl<sub>3</sub>): δ 8.80 (s, 1H), 8.21 (d, *J* = 8.3 Hz, 1H), 7.72 (dd, *J* = 7.4, 1.6 Hz, 1H), 7.43 (td, *J* = 8.3, 1.6 Hz, 1H), 6.99 (td, *J* = 7.4, 1.0 Hz, 1H), 3.75 (s, 3H), 1.35 (s, 12H); <sup>13</sup>C NMR (126 MHz, CHCl<sub>3</sub>): δ 154.2, 144.8, 136.2, 132.9, 121.8, 117.5, 84.3, 52.0, 24.8; <sup>11</sup>B NMR (CDCl<sub>3</sub>, 96 MHz): δ 30.4; HRMS (ES<sup>+</sup>) calcd. for C<sub>14</sub>H<sub>20</sub>BNO<sub>4</sub>: 278.1564 (M+H). Found: 278.1568.

### Preparation of methyl 3-(4,4,5,5-tetramethyl-1,3,2-dioxaborolan-2-yl) phenylcarbamate:

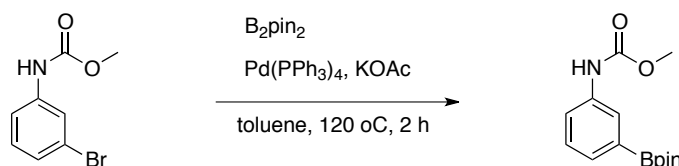

To a degassed solution of 3-bromophenyl carbamic acid methyl ester (0.5 g, 2.17 mmol), bis(pinacolate)diborane (1.104 g, 4.34 mmol), and potassium acetate (0.646 g, 6.52 mmol) in toluene (22 mL) was added tetrakis(triphenyl)phosphine palladium (0.0678 g, 2.7 mol%). The

reaction mixture was immediately heated to 120° C for 2 hours, and subsequently cooled to room temperature. After cooling, the reaction mixture was washed with H<sub>2</sub>O and brine, dried over MgSO<sub>4</sub>, filtered and concentrated. The remaining residue (1.25 g) was purified by flash chromatography (80% hexane, 20% EtOAc) and subsequent washing with hexane to give (methyl 3-(4,4,5,5-tetramethyl-1,3,2-dioxaborlan-2-yl)phenylcarbamate. A series of two columns were used to purify the product. The first column failed to separate off much of the B<sub>2</sub>Pin<sub>2</sub> but effectively removed the heavier contaminants (mass after first column: 1.12 g). The second column afforded 227 mg (37.7% yield) of pure product (white powder), and an 83 mg impure fraction that contained 66 mg (11% yield) of product. Overall yield: 293 mg, 48.7% [mp = 136°C];

<sup>1</sup>HNMR (500 MHz, CDCl<sub>3</sub>): δ 7.68 (s, 1H), 7.57 (s, 1H), 7.48 (d, *J* = 7.3 Hz, 1H), 7.31 (t, *J* = 7.8 Hz, 1H), 6.60 (s, 1H), 3.75 (s, 3H), 1.31 (s, 12H); <sup>13</sup>C NMR (126 MHz, CHCl<sub>3</sub>): δ 154.3, 139.7, 137.6, 130.1, 128.8, 119.4, 84.2, 52.5, 25.1; <sup>11</sup>B NMR (CDCl<sub>3</sub>, 96 MHz): δ 30.3; HRMS (ES<sup>+</sup>) calcd. for C<sub>14</sub>H<sub>20</sub>BNO<sub>4</sub>: 278.1564 (M+H). Found: 278.1570.

**Preparation of methyl 4-(4,4,5,5-tetramethyl-1,3,2-dioxaborlan-2-yl) phenylcarbamate:**

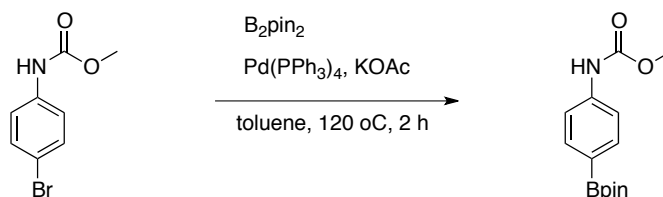

To a degassed solution of 4-bromophenyl carbamic acid methyl ester (0.5 g, 2.17 mmol), bis(pinacolate)diborane (1.104 g, 4.34 mmol), and potassium acetate (0.646 g, 6.52 mmol) in toluene (22 mL) was added tetrakis(triphenylphosphine) palladium (0.0678 g, 2.7 mol%). The reaction mixture was immediately heated to 120° C for 2 hours, and subsequently cooled to room temperature. After cooling, the reaction mixture was washed with H<sub>2</sub>O and brine, dried over MgSO<sub>4</sub>, filtered and concentrated. The remaining residue (1.85 g) was purified by flash chromatography (90% hexane, 10% EtOAc to 80% hexane, 20% EtOAc) to give (methyl 4-(4,4,5,5-tetramethyl-1,3,2-dioxaborlan-2-yl)phenylcarbamate. A series of two columns were used to purify the product. The first column failed to separate off much of the B<sub>2</sub>Pin<sub>2</sub> but effectively removed the heavier contaminants (mass after first column: 0.892 g). The second afforded a 483mg impure fraction, 252 mg of which was the desired product (42% yield). [mixed mp = 147 °C].

$^1\text{H}$  NMR (500 MHz,  $\text{CHCl}_3$ ):  $\delta$  7.73 (d,  $J = 8.6$  Hz, 2 H), 7.36 (d,  $J = 8.1$  Hz, 2 H), 6.69 (br. s., 1 H), 3.75 (s, 3 H), 1.31 (s, 12 H);  $^{13}\text{C}$  NMR (126 MHz,  $\text{CHCl}_3$ ):  $\delta$  153.9, 147.2, 140.8, 136.1, 83.9, 52.6, 25.1;  $^{11}\text{B}$  NMR ( $\text{CDCl}_3$ , 96 MHz):  $\delta$  30.2; Satisfactory HRMS results for  $\text{C}_{14}\text{H}_{20}\text{BNO}_4$  were not obtained.

### General Procedure for iridium C–H borylations

In a glovebox, a solution of 30  $\mu\text{L}$  (0.2 mmol) HBPIn and 13.1 mg (0.02 mmol)  $[\text{Ir}(\text{OMe})\text{COD}]_2$  in minimal MTBE was added to 10.7 mg (0.04 mmol) dtbpy. The solution was subsequently transferred to an air free flask equipped with a stir bar,  $\text{B}_2\text{Pin}_2$ , 1.0 mmol substrate and MTBE. The entire procedure was conducted using 2.0 mL MTBE. The reaction was allowed to proceed at 50  $^\circ\text{C}$  under a  $\text{N}_2$  atmosphere connected to a mercury bubbler for the time noted.

### Borylation of Compound 6

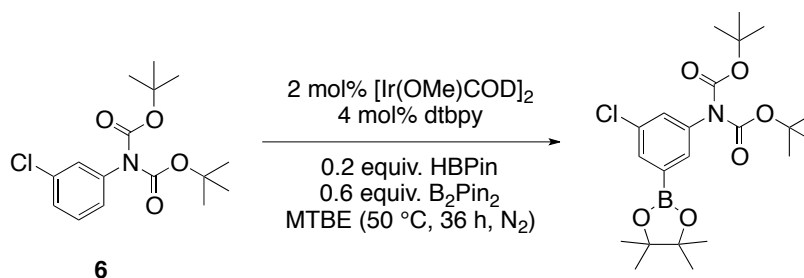

The general procedure was applied using 152 mg (0.6 mmol)  $\text{B}_2\text{Pin}_2$ , 327 mg (1.0 mmol) **6** for 36 hours. Isolation involved transferring the solution to a 20 mL scintillation vial, rinsing the air free flask with dichloromethane and removing all volatiles in vacuo. The crude solid was passed through a short pad of silica gel with dichloromethane as the eluent ( $R_f = 0.57$ ) to afford a colorless oil which crystallized upon standing for several days. The colorless crystals were loaded onto a filter frit and washed with a minimal amount of  $-78$   $^\circ\text{C}$  pentane to afford 410 mg borylated product as colorless crystals (91% yield, mp = 122-124  $^\circ\text{C}$ ).

$^1\text{H}$  NMR (500 MHz,  $\text{CDCl}_3 = 7.24$  ppm):  $\delta$  7.68 (dd,  $^4J = 0.7$  Hz,  $^4J = 2.0$  Hz, 1H), 7.44 (dd,  $^4J = 0.7$  Hz,  $^4J = 2.0$  Hz, 1H), 7.22 (t,  $^4J = 2.0$  Hz, 1H), 1.41 (s, 18H), 1.31 (s, 12H);  $^{13}\text{C}$  NMR (126 MHz,  $\text{CDCl}_3 = 77$  ppm):  $\delta$  151.57, 139.88, 133.72, 133.60, 132.40, 131.01, 84.27, 83.06, 27.91, 24.842;  $^{11}\text{B}$  NMR (96 MHz,  $\text{CDCl}_3$ ,  $\text{BF}_3 \cdot \text{OEt}_2 = 0$  ppm):  $\delta$  30.2; FT-IR (thin film): 2980, 2934, 1794, 1752, 1729, 1716, 1572, 1470, 1455, 1419, 1391, 1369, 1355, 1328, 1272, 1242, 1149, 1118, 964, 887, 868, 851, 782, 715, 702, 490, 438, 424  $\text{cm}^{-1}$ ; HRMS calcd. for  $\text{C}_{22}\text{H}_{33}\text{BCINO}_6$   $[\text{M}]^+$  453.2089, found 453.2091.



## Borylation of Compound 7

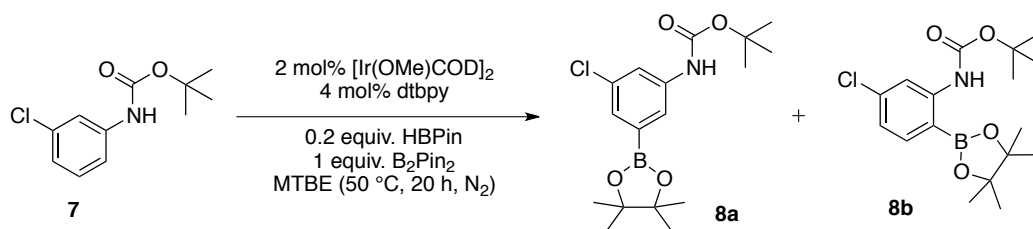

The general procedure was applied using 254 mg (1.0 mmol) B<sub>2</sub>Pin<sub>2</sub> and 227 mg (1.0 mmol) **6** for 20 hours. The reaction was transferred to a 20 mL scintillation vial with dichloromethane. A small amount of methanol was added and all volatiles were removed in vacuo. A silica gel column was run using 1 : 1 (dichloromethane / hexanes) as the eluent to afford 176 mg **8b** as a white solid (50% yield, mp 108-110 °C, R<sub>f</sub> = 0.46) and 90 mg **8a** as a white solid (25% yield, mp = 130-132 °C, R<sub>f</sub> = 0.12).

### *N*-(tert-butoxycarbonyl)-5-chloro-3-(4,4,5,5-tetramethyl-1,3,2-dioxaborolan-2-yl)aniline (**8a**)

<sup>1</sup>H NMR (600 MHz, CDCl<sub>3</sub> = 7.24 ppm): δ 7.73 (s, 1H), 7.41 (d, <sup>4</sup>J = 1.2 Hz, 1H), 7.40 (d, <sup>4</sup>J = 2.0 Hz, 1H), 6.50 (bs, 1H), 1.49 (s, 9H), 1.30 (s, 12H); <sup>13</sup>C NMR (151 MHz, CDCl<sub>3</sub> = 77 ppm): δ 152.43, 139.09, 134.59, 128.90, 122.40, 121.21, 84.18, 80.87, 28.27, 24.83; <sup>11</sup>B NMR (192 MHz, CDCl<sub>3</sub>, BF<sub>3</sub>·OEt<sub>2</sub> = 0 ppm): δ 30.2; FT-IR (thin film): 3333, 2978, 2932, 1733, 1708, 1602, 1579, 1540, 1455, 1432, 1355, 1325, 1269, 1244, 1159, 1144, 1117, 1064, 994, 966, 870, 857, 773, 716, 703, 667 cm<sup>-1</sup>; HRMS calcd. for C<sub>17</sub>H<sub>25</sub>BClNO<sub>4</sub> [M]<sup>+</sup> 353.1565, found 353.1566.

### *N*-(tert-butoxycarbonyl)-5-chloro-2-(4,4,5,5-tetramethyl-1,3,2-dioxaborolan-2-yl)aniline (**8b**)

<sup>1</sup>H NMR (600 MHz, CDCl<sub>3</sub> = 7.24 ppm): δ 8.69 (s, 1H), 8.27 (s, 1H), 7.60 (d, <sup>3</sup>J = 8.1 Hz, 1H), 6.93 (dd, <sup>3</sup>J = 8.1 Hz, <sup>4</sup>J = 2.0 Hz, 1H), 1.51 (s, 9H), 1.34 (s, 12H); <sup>13</sup>C NMR (151 MHz, CDCl<sub>3</sub> = 77 ppm): δ 152.79, 146.32, 139.03, 137.13, 121.71, 117.62, 84.39, 80.22, 28.30, 24.84; <sup>11</sup>B NMR (192 MHz, CDCl<sub>3</sub>, BF<sub>3</sub>·OEt<sub>2</sub> = 0 ppm): δ 30.3; FT-IR (thin film): 3365, 2979, 2933, 1733, 1605, 1574, 1524, 1419, 1381, 1351, 1315, 1276, 1233, 1161, 1125, 1098, 1069, 1046, 1026, 962, 934, 854, 815, 768, 744, 668 cm<sup>-1</sup>; HRMS calcd. for C<sub>17</sub>H<sub>25</sub>BClNO<sub>4</sub> [M]<sup>+</sup> 353.1565, found 353.1563.

## Borylation of 12a

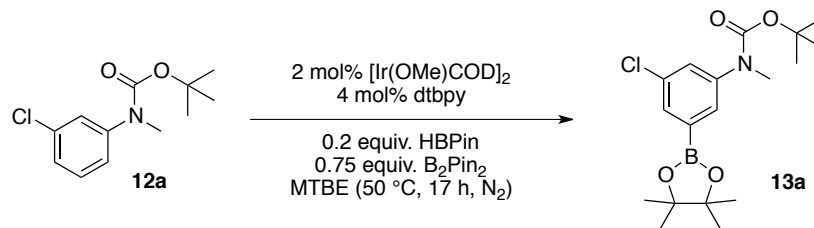

The general procedure was applied using 191 mg (0.75 mmol)  $\text{B}_2\text{Pin}_2$ , 181 mg (0.75 mmol) **12a** for 17 hours. Isolation involved transferring the solution to a 20 mL scintillation vial, rinsing the air free flask with dichloromethane, quenching with a small amount of methanol and removing all volatiles in vacuo. The crude solid was passed through a short pad of silica gel with dichloromethane as the eluent to afford a colorless oil that crystallized upon standing for several days to afford 262 mg of *N*-(*tert*-butoxycarbonyl)-*N*-methyl-3-chloro-5-(4,4,5,5-tetramethyl-1,3,2-dioxaborolan-2-yl)aniline **13a** as colorless crystals (95% yield, mp = 64-66 °C,  $R_f$  = 0.72).  $^1\text{H}$  NMR (500 MHz,  $\text{CDCl}_3$  = 7.24 ppm):  $\delta$  7.55 (d,  $^4J$  = 1.2 Hz, 1H), 7.50 (d,  $^4J$  = 1.2 Hz, 1H), 7.33 (s, 1H), 3.23 (s, 3H), 1.43 (s, 9H), 1.32 (s, 12H);  $^{13}\text{C}$  NMR (126 MHz,  $\text{CDCl}_3$  = 77 ppm):  $\delta$  154.37, 144.49, 133.64, 131.38, 129.18, 128.74, 84.23, 80.67, 37.12, 28.27, 24.83;  $^{11}\text{B}$  NMR (192 MHz,  $\text{CDCl}_3$ ,  $\text{BF}_3\cdot\text{OEt}_2$  = 0 ppm):  $\delta$  30.2; FT-IR (thin film): 2978, 2931, 1706, 1569, 1560, 1506, 1472, 1458, 1425, 1353, 1293, 1269, 1250, 1145, 994, 964, 882, 849, 769, 704, 604  $\text{cm}^{-1}$ ; HRMS calcd. for  $\text{C}_{18}\text{H}_{27}\text{BClNO}_4$   $[\text{M}]^+$  367.1722, found 367.1723.

### Borylation of **12b**

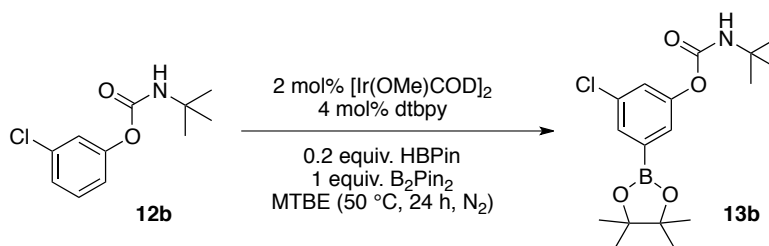

The general procedure was applied using 254 mg (1.0 mmol)  $\text{B}_2\text{Pin}_2$ , 227 mg (1.0 mmol) **12b** for 24 hours. Isolation involved transferring the solution to a 20 mL scintillation vial, rinsing the air free flask with dichloromethane and removing all volatiles in vacuo. The crude solid was passed through a short pad of silica gel with dichloromethane as the eluent to afford a colorless oil containing 3-chloro-5-(4,4,5,5-tetramethyl-1,3,2-dioxaborolan-2-yl)phenyl *tert*-butylcarbamate (**13b**) and 3-chlorophenol (5:1). This mixture was diluted with ethyl acetate and washed with 2M NaOH in water until the aqueous layer was colorless. The organic layer was subsequently

washed with saturated brine, dried over MgSO<sub>4</sub> and concentrated in vacuo to afford 178 mg **13b** as a white solid (50% yield, mp = 106-108 °C).

<sup>1</sup>H NMR (500 MHz, CDCl<sub>3</sub> = 7.24 ppm): δ 7.58 (d, <sup>4</sup>J = 1.22 Hz, 1H), 7.40 (d, <sup>4</sup>J = 1.5 Hz, 1H), 7.21 (t, <sup>4</sup>J = 2.2 Hz, <sup>4</sup>J = 2.0 Hz, 1H), 4.98 (s, 1H), 1.36 (s, 9H), 1.31 (s, 12H); <sup>13</sup>C NMR (126 MHz, CDCl<sub>3</sub> = 77 ppm): δ 152.25, 151.03, 134.11, 131.35, 125.98, 125.15, 84.25, 50.293, 28.76, 24.823; <sup>11</sup>B NMR (96 MHz, CDCl<sub>3</sub>, BF<sub>3</sub>·OEt<sub>2</sub> = 0 ppm): δ 30.5; FT-IR (thin film): 3339, 2981, 2932, 1736, 1571, 1522, 1446, 1412, 1370, 1350, 1327, 1266, 1199, 1144, 1097, 1052, 1025, 965, 935, 914, 864, 844 cm<sup>-1</sup>; HRMS calcd. for C<sub>17</sub>H<sub>25</sub>BClNO<sub>4</sub> [M]<sup>+</sup> 353.1565, found 353.1565.

### Borylation of **12c**

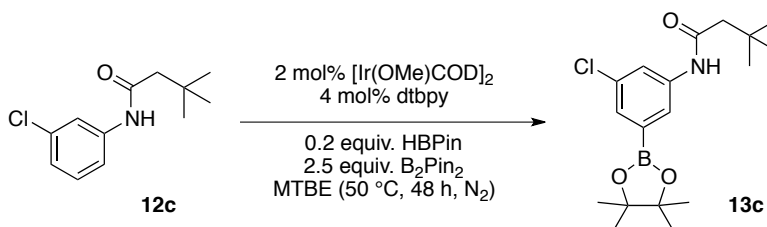

The general procedure was applied using 635 mg (2.5 mmol) B<sub>2</sub>Pin<sub>2</sub>, 225 mg (1.0 mmol) **12c** for 48 hours. Isolation involved transferring the solution to a 20 mL scintillation vial, rinsing the air free flask with dichloromethane and removing all volatiles in vacuo. The crude mixture was purified via column chromatography using dichloromethane as the eluent to afford 183 mg of *N*-(3-chloro-5-(4,4,5,5-tetramethyl-1,3,2-dioxaborolan-2-yl)phenyl)-3,3-dimethylbutanamide **13c** as a white solid (52% yield, mp = 160-162 °C, R<sub>f</sub> = 0.27).

<sup>1</sup>H NMR (500 MHz, CDCl<sub>3</sub> = 7.24 ppm): δ 7.99 (s, 1H), 7.47 (d, <sup>4</sup>J = 1.7 Hz, 1H), 7.45 (d, <sup>4</sup>J = 2.2 Hz, 1H), 7.17 (bs, 1H), 2.18 (s, 2H), 1.30 (s, 12H), 1.06 (s, 9H); <sup>13</sup>C NMR (126 MHz, CDCl<sub>3</sub> = 77 ppm): δ 170.09, 138.54, 134.58, 130.10, 123.43, 122.75, 84.24, 51.62, 31.29, 29.79, 24.83; <sup>11</sup>B NMR (96 MHz, CDCl<sub>3</sub>, BF<sub>3</sub>·OEt<sub>2</sub> = 0 ppm): δ 30.6; FT-IR (thin film): 3306, 3124, 2977, 2869, 1672, 1629, 1578, 1543, 1468, 1353, 1266, 1232, 1143, 1116, 868, 715, 707 cm<sup>-1</sup>; HRMS calcd. for C<sub>18</sub>H<sub>27</sub>BClNO<sub>3</sub> [M]<sup>+</sup> 351.1773, found 351.1775.

### Borylation of **7-d<sub>1</sub>**

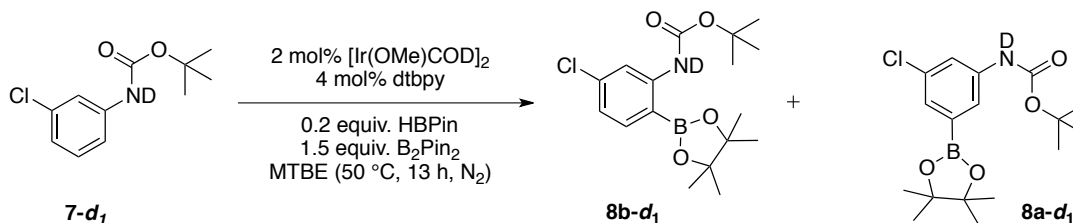

The general procedure was applied using 192 mg (0.75 mmol)  $B_2Pin_2$ , 227 mg (1.0 mmol) *N*-deuterio-*N*-(*tert*-butoxycarbonyl)-3-chloroaniline and 3.0 mL MTBE for 13 hours. The reaction at 92% conversion was 66.3 : 33.7 (**8b-d<sub>1</sub>** / **8a-d<sub>1</sub>**).

**Preparation of *N*-(*tert*-butoxycarbonyl)-4-amino-3-(4,4,5,5-tetramethyl-1,3,2-dioxaborolan-2-yl)phenol (Table 1, entry 2)**

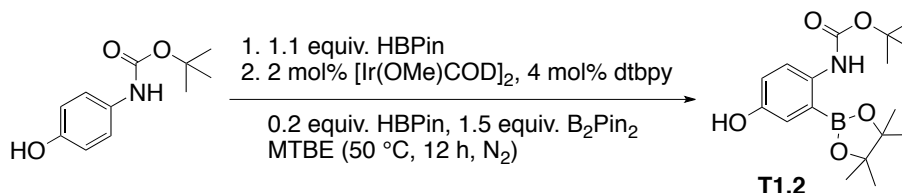

An air free flask was charged with a stir bar and 209 mg (1.0 mmol) *N*-(*tert*-butoxycarbonyl)-4-aminophenol. The addition of 160  $\mu$ L (1.1 mmol) HBPIn produced vigorous bubbling. A mixture of 13.2 mg (0.02 mmol)  $[Ir(COD)OMe]_2$  and 30  $\mu$ L (0.2 mmol) HBPIn was added to 10.8 mg (0.04 mmol) dtbpy. This was added to the air free flask with 2 mL MTBE, 381 mg (1.5 mmol)  $B_2Pin_2$  and allowed to react under  $N_2$  at 50  $^\circ$ C for 12 hours. Isolation involved transferring the solution to a 20 mL scintillation vial, rinsing the air free flask with dichloromethane and methanol, then removing all volatiles in vacuo. A column was run with 40 : 60 (ethyl acetate / hexanes) to provide 262 mg **T1.2** as a white solid (78% yield, mp = 109-111  $^\circ$ C,  $R_f$  = 0.57).

$^1H$  NMR (500 MHz,  $CDCl_3$  = 7.24 ppm):  $\delta$  8.40 (s, 1H), 7.99 (d,  $^3J$  = 8.6 Hz, 1H), 7.14 (d,  $^4J$  = 2.9 Hz, 1H), 6.90 (dd,  $^3J$  = 8.8 Hz,  $^4J$  = 2.9 Hz, 1H), 4.70 (s, 1H), 1.49 (s, 9H), 1.33 (s, 12H);  $^{13}C$  NMR (126 MHz,  $CDCl_3$  = 77 ppm):  $\delta$  153.54, 150.36, 138.23, 121.81, 119.69 (2 C's), 84.21, 79.74, 28.38, 24.81;  $^{11}B$  NMR (96 MHz,  $CDCl_3$ ,  $BF_3 \cdot OEt_2$  = 0 ppm):  $\delta$  30.3; FT-IR (thin film): 3383, 2980, 2932, 1731, 1630, 1593, 1493, 1449, 1370, 1306, 1244, 1163, 1123, 1076, 1034, 966, 891, 855  $cm^{-1}$ ; HRMS (ESI+) calcd. for  $C_{17}H_{27}BNO_5$   $[M+H]^+$  336.1982, found 336.1985.

**Preparation of *N*-(*tert*-butoxycarbonyl)-4-chloro-2-(4,4,5,5-tetramethyl-1,3,2-dioxaborolan-2-yl)aniline (Table 1, entry 3)**

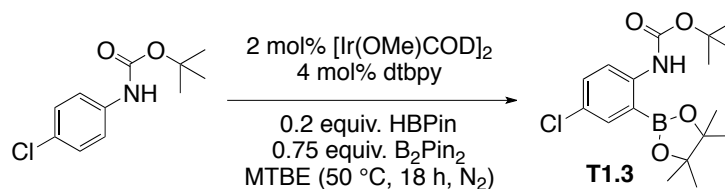

The general procedure was applied using 191 mg (0.75 mmol)  $B_2Pin_2$  and 227 mg (1.0 mmol) *N*-(*tert*-butoxycarbonyl)-4-chloroaniline for 18 hours. Isolation involved transferring the solution to

a 20 mL scintillation vial, rinsing the air free flask with dichloromethane and removing all volatiles in vacuo. The crude solid was passed through a short pad of silica gel with minimal dichloromethane as the eluent ( $R_f = 0.67$ ). After removing all volatiles in vacuo, the residual starting material was sublimed (0.02 mmHg, 50 °C) leaving behind 278 mg **T1.3** as a white solid (79% yield, mp = 106-108 °C).

$^1\text{H}$  NMR (500 MHz,  $\text{CDCl}_3 = 7.24$  ppm):  $\delta$  8.60 (bs, 1H), 8.13 (d,  $^3J = 9.0$  Hz, 1H), 7.64 (d,  $^4J = 2.7$  Hz, 1H), 7.33 (dd,  $^3J = 9.0$  Hz,  $^4J = 2.9$  Hz, 1H), 1.50 (s, 9H), 1.34 (s, 12H);  $^{13}\text{C}$  NMR (126 MHz,  $\text{CDCl}_3 = 77$  ppm):  $\delta$  152.93, 143.74, 135.41, 132.42, 126.66, 119.09, 84.57, 80.06, 28.31, 24.82;  $^{11}\text{B}$  (96 MHz,  $\text{CDCl}_3$ ,  $\text{BF}_3 \cdot \text{OEt}_2 = 0$  ppm):  $\delta$  30.2; FT-IR (thin film): 3405, 2979, 2932, 1733, 1605, 1579, 1524, 1470, 1408, 1393, 1374, 1345, 1313, 1257, 1235, 1162, 1134, 1110, 1077, 1046, 1029, 963, 869, 848, 829, 744, 690, 667, 530, 440  $\text{cm}^{-1}$ ; HRMS calcd. for  $\text{C}_{17}\text{H}_{25}\text{BCINO}_4$   $[\text{M}]^+$  353.1565, found 353.1566.

#### Preparation of *N*-(*tert*-butoxycarbonyl)-4-bromo-2-(4,4,5,5-tetramethyl-1,3,2-dioxaborolan-2-yl)aniline (Table 1, entry 4)

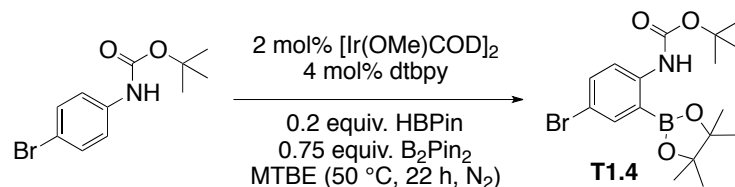

The general procedure was applied using 192 mg (0.75 mmol)  $\text{B}_2\text{Pin}_2$  and 273 mg (1.0 mmol) *N*-(*tert*-butoxycarbonyl)-4-bromoaniline for 22 hours. Isolation involved transferring the solution to a 20 mL scintillation vial, rinsing the air free flask with dichloromethane and removing all volatiles in vacuo. The crude solid was passed through a short pad of silica gel with dichloromethane as the eluent to afford 354 mg **T1.4** as a white solid (89% yield, mp = 120-122 °C,  $R_f = 0.68$ ). Diffraction quality crystals were grown from pentane solution at  $-20$  °C.

$^1\text{H}$  NMR (500 MHz,  $\text{CDCl}_3 = 7.24$  ppm):  $\delta$  8.60 (bs, 1H), 8.08 (d,  $^3J = 8.8$  Hz, 1H), 7.78 (d,  $^4J = 2.4$  Hz, 1H), 7.47 (dd,  $^3J = 8.8$  Hz,  $^4J = 2.7$  Hz, 1H), 1.50 (s, 9H), 1.34 (s, 12H);  $^{13}\text{C}$  NMR (126 MHz,  $\text{CDCl}_3 = 77$  ppm):  $\delta$  152.88, 144.23, 138.35, 135.33, 119.46, 114.27, 84.58, 80.10, 28.31, 24.82;  $^{11}\text{B}$  NMR (96 MHz,  $\text{CDCl}_3$ ,  $\text{BF}_3 \cdot \text{OEt}_2 = 0$  ppm):  $\delta$  30.6; FT-IR (thin film): 3371, 2978, 2932, 1733, 1603, 1574, 1522, 1469, 1405, 1370, 1313, 1229, 1136, 1080, 1047, 1025, 962, 902, 863, 828, 770, 743, 680, 638, 527, 442  $\text{cm}^{-1}$ ; HRMS calcd. for  $\text{C}_{17}\text{H}_{25}\text{BBrNO}_4$   $[\text{M}]^+$  397.1060, found 397.1061. X-Ray quality crystals were grown from pentane at  $-20$  °C.

**Preparation of *N*-(*tert*-butoxycarbonyl)-4-chloro-5-fluoro-2-(4,4,5,5-tetramethyl-1,3,2-dioxaborolan-2-yl)aniline (Table 1, entry 5) and *N*-(*tert*-butoxycarbonyl)-4-chloro-3-fluoro-2-(4,4,5,5-tetramethyl-1,3,2-dioxaborolan-2-yl)aniline (B)**

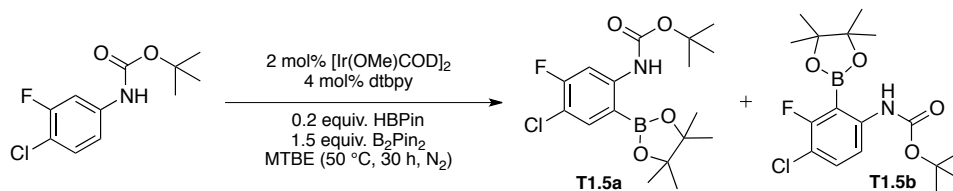

The general procedure was applied using 381 mg (1.5 mmol) B<sub>2</sub>Pin<sub>2</sub> and 245 mg (1.0 mmol) *N*-(*tert*-butoxycarbonyl)-4-chloro-3-fluoroaniline for 30 hours. Isolation involved transferring the solution to a 20 mL scintillation vial, rinsing the air free flask with dichloromethane and removing all volatiles in vacuo. The crude product consisted of 76 : 24 (**T1.5a/b**) and was fractionated through neutral Al<sub>2</sub>O<sub>3</sub> (III) with 1 : 3 (dichloromethane / hexanes) as the eluent to provide 251 mg **T1.5a** as a white solid (68% yield, mp = 120-122 °C).

**T1.5a**

<sup>1</sup>H NMR (500 MHz, CDCl<sub>3</sub> = 7.24 ppm): δ 8.69 (bs, 1H), 8.10 (d, <sup>3</sup>J<sub>F-H</sub> = 12.5 Hz, 1H), 7.68 (d, <sup>4</sup>J<sub>F-H</sub> = 8.8 Hz, 1H), 1.50 (s, 9H), 1.34 (s, 12H); <sup>13</sup>C NMR (126 MHz, CDCl<sub>3</sub> = 77 ppm): δ 160.70 (d, <sup>1</sup>J<sub>C-F</sub> = 250.4 Hz), 152.64 (s), 145.65 (d <sup>3</sup>J<sub>C-F</sub> = 11.1 Hz), 137.61 (s), 113.33 (d, <sup>3</sup>J<sub>C-F</sub> = 17.5), 106.34 (d, <sup>2</sup>J<sub>C-F</sub> = 27.2 Hz), 84.64 (s), 80.50 (s), 28.27 (s), 24.82 (s); <sup>11</sup>B (96 MHz, CDCl<sub>3</sub>, BF<sub>3</sub>·OEt<sub>2</sub> = 0 ppm): δ 30.0; <sup>19</sup>F NMR (282 MHz, CDCl<sub>3</sub>, CFCl<sub>3</sub> = 0 ppm): δ -108.01 (t, <sup>3</sup>J<sub>F-H</sub> = 12.1); FT-IR(thin film): 3366, 3126, 2980, 2933, 1734, 1591, 1530, 1473, 1452, 1419, 1382, 1353, 1319, 1283, 1242, 1160, 1139, 1092, 1063, 1004, 961, 906, 890, 860, 828, 771, 734, 689, 672, 622, 597, 439 cm<sup>-1</sup>; HRMS calcd. for C<sub>17</sub>H<sub>24</sub>BFCINO<sub>4</sub> [M]<sup>+</sup> 371.1471, found 371.1480.

**T1.5b**

<sup>1</sup>H (500 MHz, CDCl<sub>3</sub> = 7.24 ppm): δ 8.79 (bs, 1H), 7.92 (d, <sup>3</sup>J = 9.0 Hz, 1H), 7.35 (t, <sup>3</sup>J = 8.8 Hz, <sup>4</sup>J<sub>F-H</sub> = 8.6 Hz, 1H), 1.49 (s, 9H), 1.36 (s, 12H); <sup>19</sup>F NMR (282 MHz, CDCl<sub>3</sub>, CFCl<sub>3</sub> = 0 ppm): δ -102.7 (d, <sup>4</sup>J<sub>F-H</sub> = 9.2 Hz).

**Preparation of *N*-(*tert*-butoxycarbonyl)-4-fluoro-5-methyl-2-(4,4,5,5-tetramethyl-1,3,2-dioxaborolan-2-yl)aniline (Table 1, entry 6a) and *N*-(*tert*-butoxycarbonyl)-4-fluoro-5-methyl-3-(4,4,5,5-tetramethyl-1,3,2-dioxaborolan-2-yl)aniline (Table 1, entry 6b)**

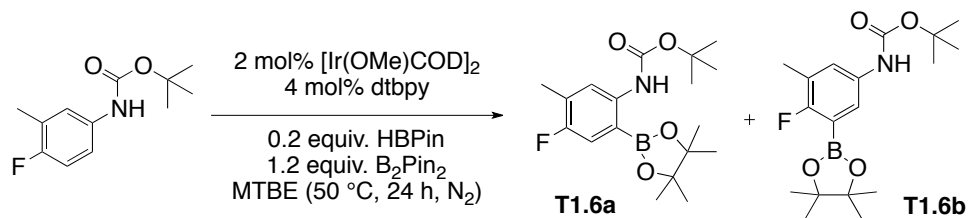

The general procedure was applied using 305 mg (1.2 mmol)  $\text{B}_2\text{Pin}_2$ , 225 mg (1 mmol) *N*-(*tert*-butoxycarbonyl)-4-fluoro-3-methylaniline for 24 hours. Isolation involved transferring the solution to a 20 mL scintillation vial, rinsing the air free flask with dichloromethane, quenching with a small amount of methanol and removing all volatiles in vacuo to provide a 91 : 9 (**T1.6a** / **T1.6b**) mixture. The crude solid was passed through a pad of silica gel with dichloromethane as the eluent. This solid was further purified by crystallization from minimal chloroform and 1 mL pentane at  $-80$  °C to afford 244 mg 92 : 8 (**T1.6a** / **T1.6b**) as a white solid (70% yield, mp = 108-116 °C). Column chromatography on 99 mg using 10 : 1 (ethyl acetate / hexanes) as the eluent afforded 75 mg **T1.6a** as a white solid (76% yield based on 99 mg mixture, mp = 124-126 °C,  $R_f = 0.41$ ) while **T1.6b** was fractioned with impurities.

#### **T1.6a**

$^1\text{H NMR}$  (500 MHz,  $\text{CDCl}_3$  = 7.24 ppm):  $\delta$  8.50 (s, 1H), 8.01 (d,  $^4J_{\text{H-F}} = 6.6$  Hz, 1H), 7.27 (d,  $^3J_{\text{H-F}} = 9.8$  Hz, 1H), 2.26 (d,  $^4J_{\text{H-F}} = 1.7$  Hz, 3H), 1.50 (s, 9H), 1.33 (s, 12H);  $^{13}\text{C NMR}$  (151 MHz,  $\text{CDCl}_3$  = 77 ppm):  $\delta$  156.36 (d,  $^1J_{\text{C-F}} = 239.9$  Hz), 153.23 (s), 140.99 (s), 129.67 (d,  $^2J_{\text{C-F}} = 17.8$  Hz), 121.17 (d,  $^2J_{\text{C-F}} = 21.9$  Hz), 120.70 (s), 84.32 (s), 79.75 (s), 28.35 (s), 24.82 (s), 15.16 (d,  $^3J_{\text{C-F}} = 3.5$  Hz);  $^{11}\text{B NMR}$  (192 MHz,  $\text{CDCl}_3$ ,  $\text{BF}_3 \cdot \text{OEt}_2 = 0$  ppm):  $\delta$  29.9;  $^{19}\text{F NMR}$  (282 MHz,  $\text{CDCl}_3$ ,  $\text{CFCl}_3 = 0$  ppm):  $\delta$  -127.06 (t,  $^3J_{\text{H-F}} = 8.61$  Hz,  $^4J_{\text{H-F}} = 6.89$  Hz); FT-IR (thin film): 3357, 3042, 2979, 2926, 1723, 1652, 1582, 1540, 1420, 1370, 1350, 1311, 1292, 1254, 1170, 1139, 1067, 1009, 961, 893, 854, 836, 763, 738, 687  $\text{cm}^{-1}$ ; HRMS calcd. for  $\text{C}_{18}\text{H}_{27}\text{BFNO}_4$  [ $\text{M}$ ] $^+$  351.2017, found 351.2011.

#### **T1.6b**

$^1\text{H NMR}$  (600 MHz,  $\text{CDCl}_3$  = 7.24 ppm):  $\delta$  7.50 (s, 1H), 7.27-7.25 (m, 1H), 6.39-6.38 (m, 1H), 2.22 (d,  $J = 2.0$  Hz, 3H), 1.48 (s, 9H), 1.32 (s, 12H),  $^{19}\text{F NMR}$  (282 MHz,  $\text{CDCl}_3 = 0$  ppm):  $\delta$  -114.0.

**Preparation of *N*-(*tert*-butoxycarbonyl)-5-chloro-4-methoxy-2-(4,4,5,5-tetramethyl-1,3,2-dioxaborolan-2-yl)aniline (Table 1, entry 7)**

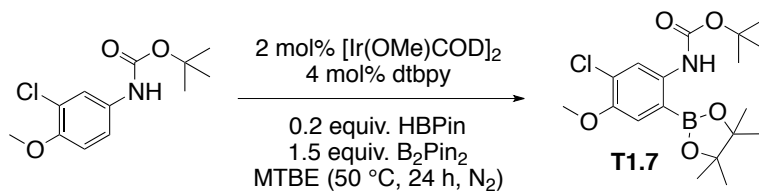

The general procedure was applied using 382 mg (1.5 mmol)  $B_2Pin_2$ , 385 mg (1.0 mmol) *N*-(*tert*-butoxycarbonyl)-2-chloro-4-aminoanisole for 24 hours. Isolation involved transferring the solution to a 20 mL scintillation vial, rinsing the air free flask with dichloromethane and removing all volatiles in vacuo. The crude solid was passed through a short pad of silica gel with dichloromethane as the eluent to afford 365 mg **T1.7** as an off-white solid (95% yield, mp = 130 °C,  $R_f$  = 0.39).

$^1H$  NMR (500 MHz,  $CDCl_3$  = 7.24 ppm):  $\delta$  8.49 (s, 1H), 8.27 (s, 1H), 7.20 (s, 1H), 3.87 (s, 3H), 1.50 (s, 9H), 1.34 (s, 12H);  $^{13}C$  NMR (126 MHz,  $CDCl_3$  = 77 ppm):  $\delta$  152.99, 149.62, 139.37, 127.20, 120.07, 118.49, 84.44, 79.91, 56.46, 28.33, 24.82;  $^{11}B$  NMR (96 MHz,  $CDCl_3$ ,  $BF_3 \cdot OEt_2$  = 0 ppm):  $\delta$  30.5; FT-IR (thin film): 3370, 3112, 2977, 2938, 2835, 1727, 1604, 1586, 1520, 1467, 1401, 1351, 1305, 1265, 1232, 1200, 1162, 1090, 1057, 956, 855, 743, 428, 408  $cm^{-1}$ ; HRMS calcd. for  $C_{28}H_{27}BClNO_5$   $[M]^+$  383.1671, found 383.1674. X-Ray quality crystals were grown from pentane at  $-20$  °C.

#### Preparation of *N*-(*tert*-butoxycarbonyl)-4-trifluoromethyl-2-(4,4,5,5-tetramethyl-1,3,2-dioxaborolan-2-yl)aniline (Table 1, entry 8)

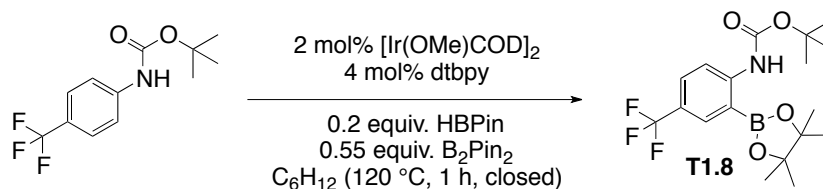

In a glovebox, a solution of 29  $\mu L$  (0.2 mmol) HBPIn and 13.1 mg (0.02 mmol)  $[Ir(OMe)COD]_2$  in minimal cyclohexane was added to 10.7 mg (0.04 mmol) dtbpy. The solution was subsequently transferred to an air free equipped with a stir bar, 139 mg (0.55 mmol)  $B_2Pin_2$  and 263 mg (1.0 mmol) *N*-(*tert*-butoxycarbonyl)-4-trifluoromethylaniline with cyclohexane. The entire procedure was conducted using 2.0 mL cyclohexane. The reaction was allowed to proceed at 120 °C in a closed system for 1 hour. Isolation involved cooling to room temperature, transferring the solution to a 20 mL scintillation vial, rinsing the air free flask with dichloromethane and removing all volatiles in vacuo. The crude solid was passed through a short



pad of silica gel with dichloromethane as the eluent ( $R_f = 0.73$ ). The residual starting material was sublimed (0.02 mmHg, 80 °C) leaving behind 317 mg **T1.8** as a white solid (82% yield, mp = 108-110 °C). Diffraction quality crystals were grown from pentane solution at -20 °C.

$^1\text{H}$  NMR (500 MHz,  $\text{CDCl}_3 = 7.24$  ppm):  $\delta$  8.82 (bs, 1H), 8.30 (d,  $^3J = 8.8$  Hz, 1H), 7.94 (d,  $^4J = 2.0$  Hz, 1H), 7.61 (dd,  $^3J = 8.8$  Hz,  $^4J = 2.2$  Hz, 1H), 1.51, (s, 9H), 1.36 (s, 12H);  $^{13}\text{C}$  NMR (126 MHz,  $\text{CDCl}_3 = 77$  ppm):  $\delta$  152.75 (s), 148.18 (s), 133.21 (d,  $^3J_{\text{C-F}} = 3.7$ ), 129.54 (d,  $^3J_{\text{C-F}} = 3.2$  Hz), 124.38 (q,  $^1J_{\text{C-F}} = 271.6$  Hz), 123.37 (q,  $^2J_{\text{C-F}} = 32.2$  Hz), 117.28 (s), 84.72 (s), 80.44 (s), 28.25 (s), 24.81 (s);  $^{11}\text{B}$  NMR (96 MHz,  $\text{CDCl}_3$ ,  $\text{BF}_3 \cdot \text{OEt}_2 = 0$  ppm):  $\delta$  30.6;  $^{19}\text{F}$  NMR (282 MHz,  $\text{CDCl}_3$ ,  $\text{CFCl}_3 = 0$  ppm):  $\delta$  -62.01; FT-IR (thin film): 3367, 2980, 2934, 1738, 1620, 1594, 1539, 1430, 1362, 1270, 1238, 1162, 1144, 1120, 1079, 1047, 1025, 964, 867, 848, 758, 682, 638, 606  $\text{cm}^{-1}$ ; HRMS calcd. for  $\text{C}_{18}\text{H}_{25}\text{BF}_3\text{NO}_4$   $[\text{M}]^+$  387.1829, found 387.1827. X-Ray quality crystals were grown from pentane at -20 °C.

**Preparation of *N*-(*tert*-butoxycarbonyl)-*O*-(*N,N'*-dimethylcarbamoyl)-4-amino-3-(4,4,5,5-tetramethyl-1,3,2-dioxaborolan-2-yl)phenol (Table 1, entry 9)**

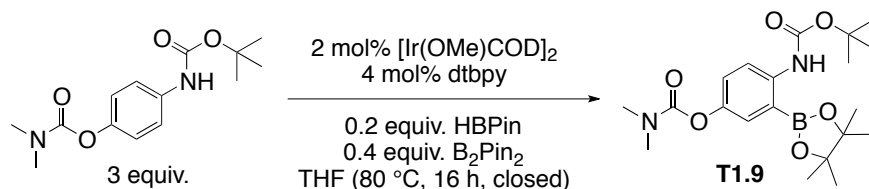

In a glovebox, a solution of 15  $\mu\text{L}$  (0.1 mmol) HBPIn and 6.6 mg (0.01 mmol)  $[\text{Ir}(\text{OMe})\text{COD}]_2$  in minimal THF was added to 5.3 mg (0.02 mmol) dtbpy. The solution was subsequently transferred to an air free flask equipped with a stir bar, 51 mg (0.2 mmol)  $\text{B}_2\text{Pin}_2$  and 610 mg (1.5 mmol) *O*-(*N,N'*-dimethylcarbamoyl)-*N*-(*tert*-butoxycarbonyl)-4-aminophenol in THF. The entire procedure was conducted using 2.0 mL THF. The reaction was allowed to proceed at 80 °C in a closed system for 16 hours. Isolation involved transferring the solution to a 20 mL scintillation vial, rinsing the air free flask with dichloromethane and removing all volatiles in vacuo. The crude solid was passed through a short pad of silica gel with dichloromethane as the eluent ( $R_f = 0.07$ ). The recovered solid was washed with copious amounts of cyclohexane, concentrated to approximately 4 mL and cooled. The precipitated starting material was filtered and washed sparingly with cold cyclohexane. The filtrate was pumped down and the remaining solid crystallized from pentane at -80 °C overnight to afford 89 mg **T1.9** as white needles (44%

yield, mp = 126-128 °C). Diffraction quality crystals were grown from pentane solution at -20 °C.

<sup>1</sup>H NMR (500 MHz, CDCl<sub>3</sub> = 7.24 ppm): δ 8.59 (bs, 1H), 8.15 (d, <sup>3</sup>J = 9.0 Hz, 1H), 7.41 (d, <sup>4</sup>J = 2.9 Hz, 1H), 7.13 (dd, <sup>3</sup>J = 9.0 Hz, <sup>4</sup>J = 2.9 Hz, 1H), 3.04 (s, 3H), 2.96 (s, 3H), 1.50 (s, 9H), 1.32 (s, 12H); <sup>13</sup>C NMR (126 MHz, CDCl<sub>3</sub> = 77 ppm): δ 155.21, 153.08, 145.61, 142.44, 128.61, 126.04, 118.60, 84.33, 79.73, 36.64, 36.35, 28.34, 24.83; <sup>11</sup>B NMR (96 MHz, CDCl<sub>3</sub>, BF<sub>3</sub>·OEt<sub>2</sub> = 0 ppm): δ 30.5; FT-IR (thin film): 3382, 2979, 2933, 1728, 1615, 1592, 1533, 1476, 1455, 1425, 1387, 1347, 1329, 1198, 1158, 1072, 1048, 1023, 965, 915, 854, 822, 791, 770, 743, 678, 547 cm<sup>-1</sup>; HRMS calcd. for C<sub>20</sub>H<sub>31</sub>BN<sub>2</sub>O<sub>6</sub> [M]<sup>+</sup> 406.2275, found 406.2275. X-Ray quality crystals were grown from pentane at -20 °C.

**Preparation of *O*-(*N,N'*-dimethylcarbamoyl)-*N*-(*tert*-butoxycarbonyl)-2-chloro-5-(4,4,5,5-tetramethyl-1,3,2-dioxaborolan-2-yl)-4-aminophenol (Table 1, entry 10)**

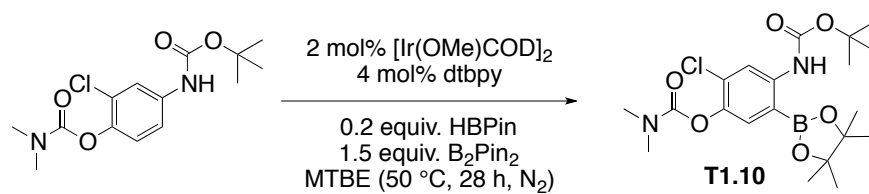

The general procedure was applied using 381 mg (1.5 mmol) B<sub>2</sub>Pin<sub>2</sub>, 314 mg (1.0 mmol) *O*-(*N,N'*-dimethylcarbamoyl)-*N*-(*tert*-butoxycarbonyl)-2-chloro-4-aminophenol for 28 hours. Isolation involved transferring the solution to a 20 mL scintillation vial, rinsing the air free flask with dichloromethane and removing all volatiles in vacuo. The crude solid was passed through a short pad of silica gel with dichloromethane as the eluent twice to afford 272 mg **T1.10** as a white solid (62% yield, mp = 140-142 °C, R<sub>f</sub> = 0.26).

<sup>1</sup>H NMR (300 MHz, CDCl<sub>3</sub> = 7.24 ppm): δ 8.62 (s, 1H), 8.34 (s, 1H), 7.48 (s, 1H), 3.09 (s, 3H), 2.99 (s, 3H), 1.50 (s, 9H), 1.32 (s, 12H); <sup>13</sup>C NMR (75 MHz, CDCl<sub>3</sub> = 77 ppm): δ 154.20, 152.77, 143.13, 141.69, 131.59, 130.60, 119.05, 84.51, 80.18, 36.80, 36.45, 28.28, 24.82; <sup>11</sup>B NMR (96 MHz, CDCl<sub>3</sub>, BF<sub>3</sub>·OEt<sub>2</sub> = 0 ppm): δ 29.9; FT-IR (thin film): 3365, 2977, 2933, 1731, 1609, 1579, 1522, 1470, 1411, 1382, 1345, 1309, 1249, 1155, 1089, 1057, 973, 955, 908, 853, 839, 791, 752, 684, 669, 600, 503, 436 cm<sup>-1</sup>; HRMS calcd. for C<sub>20</sub>H<sub>30</sub>BClN<sub>2</sub>O<sub>6</sub> [M]<sup>+</sup> 340.1885, found 340.1895.

**Preparation of *N*-(*tert*-butoxycarbonyl)-4-amino-3-(4,4,5,5-tetramethyl-1,3,2-dioxaborolan-2-yl)benzotrile (Table 1, entry 11)**

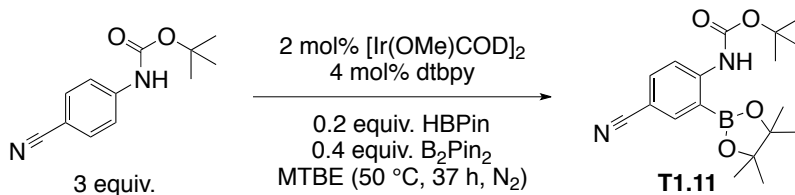

In a glovebox, a solution of 30  $\mu\text{L}$  (0.2 mmol) HBPin and 13.1 mg (0.02 mmol)  $[\text{Ir}(\text{OMe})\text{COD}]_2$  in minimal MTBE was added to 10.8 mg (0.02 mmol) dtbpy. The solution was subsequently transferred to an air free equipped with a stir bar, 103 mg (0.4 mmol)  $\text{B}_2\text{Pin}_2$  and 654 mg (2.0 mmol) *N*-(*tert*-butoxycarbonyl)-4-aminobenzonitrile in MTBE. The entire procedure was conducted using 2.0 mL MTBE. The reaction proceeded at 50  $^\circ\text{C}$  under  $\text{N}_2$  for 37 hours. Isolation involved transferring the solution to a 20 mL scintillation vial, rinsing the air free flask with dichloromethane and removing all volatiles in vacuo. The crude solid was passed through a short pad of silica gel with dichloromethane as the eluent and all volatiles removed in vacuo. This recovered solid was washed with copious amounts of cyclohexane and concentrated. Cyclohexane was found to best solubilize **T1.11** in the presence of *N*-(*tert*-butoxycarbonyl)-4-aminobenzonitrile when compared to room temperature and  $-78$   $^\circ\text{C}$  hexanes, pentane and cyclopentane. Column chromatography of the residual white solid, containing a mixture of starting material and borylated product with Florisil<sup>®</sup> using 1 : 9 (ethyl acetate / hexanes) afforded 136 mg **T1.11** (40% yield, mp = 118  $^\circ\text{C}$ ).

$^1\text{H}$  NMR (500 MHz,  $\text{CDCl}_3$  = 7.24 ppm):  $\delta$  8.86 (bs, 1H), 8.32 (d,  $^3J = 8.8$  Hz, 1H), 7.98 (d,  $^4J = 2.2$  Hz, 1H), 7.63 (dd,  $^3J = 8.8$  Hz,  $^4J = 2.2$  Hz, 1H), 1.51 (s, 9H), 1.35 (s, 12H);  $^{13}\text{C}$  NMR (126 MHz,  $\text{CDCl}_3$  = 77 ppm):  $\delta$  152.43, 148.85, 140.51, 136.17, 119.13, 117.57, 104.68, 84.9, 80.88, 28.22, 24.83;  $^{11}\text{B}$  NMR (96 MHz,  $\text{CDCl}_3$ ,  $\text{BF}_3\text{OEt}_2 = 0$  ppm):  $\delta$  30.5; FT-IR (thin film): 3354, 2980, 2932, 2221, 1735, 1609, 1585, 1529, 1480, 1414, 1397, 1362, 1321, 1250, 1165, 1139, 1078, 1050, 1030, 979, 966, 914, 891, 850, 832, 768, 748, 693, 563  $\text{cm}^{-1}$ ; HRMS calcd. for  $\text{C}_{18}\text{H}_{25}\text{BN}_2\text{O}_4$   $[\text{M}]^+$  344.1907, found 344.1910.

**Preparation of Potassium (*N*-(*tert*-butoxycarbonyl)-2-amino-5-cyanophenyl) trifluoroborate (Table 1, entry 12)**

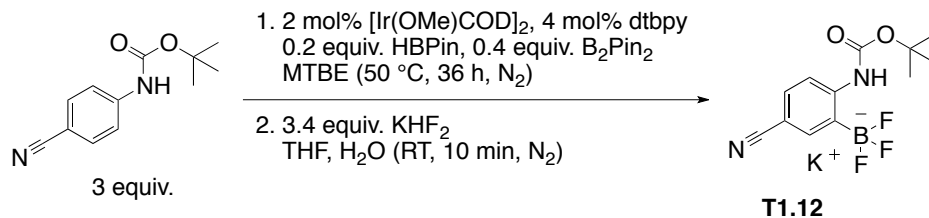

In a glovebox, a solution of 15  $\mu\text{L}$  (0.1 mmol) HBPIn and 6.6 mg (0.01 mmol) [Ir(OMe)COD]<sub>2</sub> in minimal MTBE was added to 5.3 mg (0.02 mmol) dtbpy. The solution was subsequently transferred to an air free equipped with a stir bar, 52 mg (0.2 mmol) B<sub>2</sub>Pin<sub>2</sub> and 327 mg (1.5 mmol) *N*-(*tert*-butoxycarbonyl)-4-aminobenzonitrile in MTBE. The entire procedure was conducted using 2.0 mL MTBE. The reaction proceeded at 50 °C under N<sub>2</sub> for 36 hours. Isolation involved transferring the solution to a 20 mL scintillation vial, rinsing the air free flask with dichloromethane and removing all volatiles in vacuo. This recovered solid was washed with copious amounts of cyclohexane and concentrated. Cyclohexane was found to best solubilize **T1.11** in the presence of *N*-(*tert*-butoxycarbonyl)-4-aminobenzonitrile when compared to room temperature and  $-78$  °C hexanes, pentane and cyclopentane. The residual white solid, containing a mixture of starting material and borylated product, was treated with 136 mg (1.7 mmol) KHF<sub>2</sub> in 350  $\mu\text{L}$  THF and 210  $\mu\text{L}$  water for 10 min. After all volatiles were removed in vacuo, the remaining solid was extracted with acetone. Concentrating the solution provided a solid that was washed with hexanes and chloroform to afford 90 mg **T1.12** as a white solid (51% yield, mp > 230 °C).

<sup>1</sup>H NMR (500 MHz, acetone-d<sub>6</sub> = 2.05 ppm):  $\delta$  8.44 (bs, 1H), 8.19 (d, <sup>3</sup>*J* = 8.5 Hz, 1H), 7.66 (d, <sup>4</sup>*J* = 2.0 Hz, 1H), 7.40 (dd, <sup>3</sup>*J* = 8.6 Hz, <sup>4</sup>*J* = 2.2 Hz, 1H), 1.49 (s, 9H); <sup>13</sup>C NMR (126 MHz, acetone-d<sub>6</sub> = 206 ppm):  $\delta$  153.20, 146.76, 136.87, 130.93, 120.90, 116.79, 104.13, 79.76, 28.19; <sup>11</sup>B NMR (96 MHz, acetone-d<sub>6</sub>, BF<sub>3</sub>·OEt<sub>2</sub> = 0 ppm):  $\delta$  3.4; <sup>19</sup>F NMR (282 MHz, acetone-d<sub>6</sub>, CFC<sub>3</sub> = 0 ppm):  $\delta$  -139.15; FT-IR (thin film): 3393, 3020, 2985, 2935, 2229, 1724, 1581, 1517, 1392, 1366, 1312, 1245, 1212, 1156, 1119, 1052, 1024, 943, 937, 899, 847, 819, 598 cm<sup>-1</sup>; HRMS calcd. for C<sub>12</sub>H<sub>13</sub>BF<sub>3</sub>N<sub>2</sub>O<sub>2</sub> [M-K]<sup>-</sup> 285.1022, found 285.1025.

### Borylation of Enamine 20

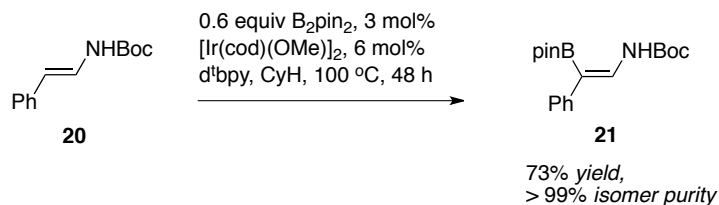

In a glovebox, a 5 mL Weaton microreactor was charged with [Ir(cod)(OMe)<sub>2</sub>] (~ 10.0 mg, 3.0 mol%), d<sup>t</sup>bpy (8.0 mg, 6.0 mol%), B<sub>2</sub>pin<sub>2</sub> (76.2 mg, 0.3 mmol, 0.6 equiv) and substrate **20** (~ 109.56 mg, 0.5 mmol). Dry cyclohexane (3 mL, 0.16 M) was added under an inert atmosphere. The microreactor was capped with a Teflon pressure cap and placed into pre-heated aluminum block at 100 °C. The reaction mixture was stirred for 48 h. After completion (judged by TLC), cyclohexane was removed under reduced pressure and chromatographic separation with silica gel (dichloromethane as eluent) gave 126 mg of **21** (73%) as white solid (mp = 120–121 °C); <sup>1</sup>H NMR (500 MHz, CHCl<sub>3</sub>): δ 8.58 (d, *J* = 10.0 Hz, 1 H), 7.54 (d, *J* = 10.0 Hz, 1 H), 7.39 (d, *J* = 7.1 Hz, 2 H), 7.25 - 7.33 (m, 2 H), 7.18 (d, *J* = 6.8 Hz, 1 H), 1.53 (s, 9 H), 1.35 (s, 12 H); <sup>13</sup>C NMR (126 MHz, CHCl<sub>3</sub>): δ 153.1, 141.8, 128.8, 128.3, 127.8, 125.7, 125.4, 83.8, 81.1, 28.5, 25.1; <sup>11</sup>B NMR (CDCl<sub>3</sub>, 96 MHz): δ 29.9; HRMS (ES<sup>+</sup>) calcd. for C<sub>19</sub>H<sub>28</sub>BNO<sub>4</sub>: 346.2190 (M+H). Found: 346.2194.

### Borylation of PhNHCO<sub>2</sub>Me at room temperature

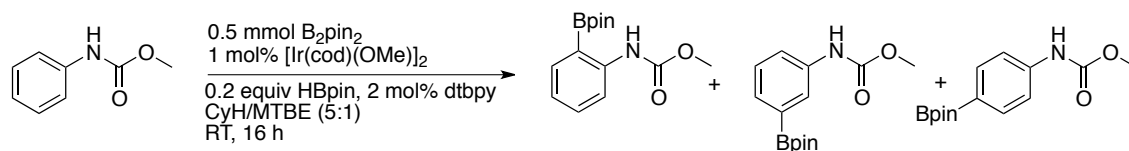

In a glovebox, a 5 mL Weaton microreactor was charged with [Ir(cod)(OMe)<sub>2</sub>] (~ 6.6 mg, 1.0 mol%), HBpin (29.0 μl, 0.2 equiv), d<sup>t</sup>bpy (5.4 mg, 2.0 mol%), B<sub>2</sub>pin<sub>2</sub> (127 mg, 0.5 mmol) and PhNHCO<sub>2</sub>Me (151.2 mg, 1.0 mmol). Dry cyclohexane (2.5 mL) and MTBE (0.5 mL) was added under an inert atmosphere. The microreactor was capped with a Teflon pressure cap and placed into an aluminum block at RT for 16 h. The crude reaction mixture was analyzed by GC-FID which suggested that the ratios of *ortho*-, *meta*-, and *para*- isomers were following: *ortho:meta:para* = 90:5:5.

500MHz CDCl3=7.24p 1H  
3-Cl-N(Boc)2-aniline  
Pulse Sequence: s2pul

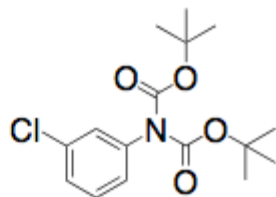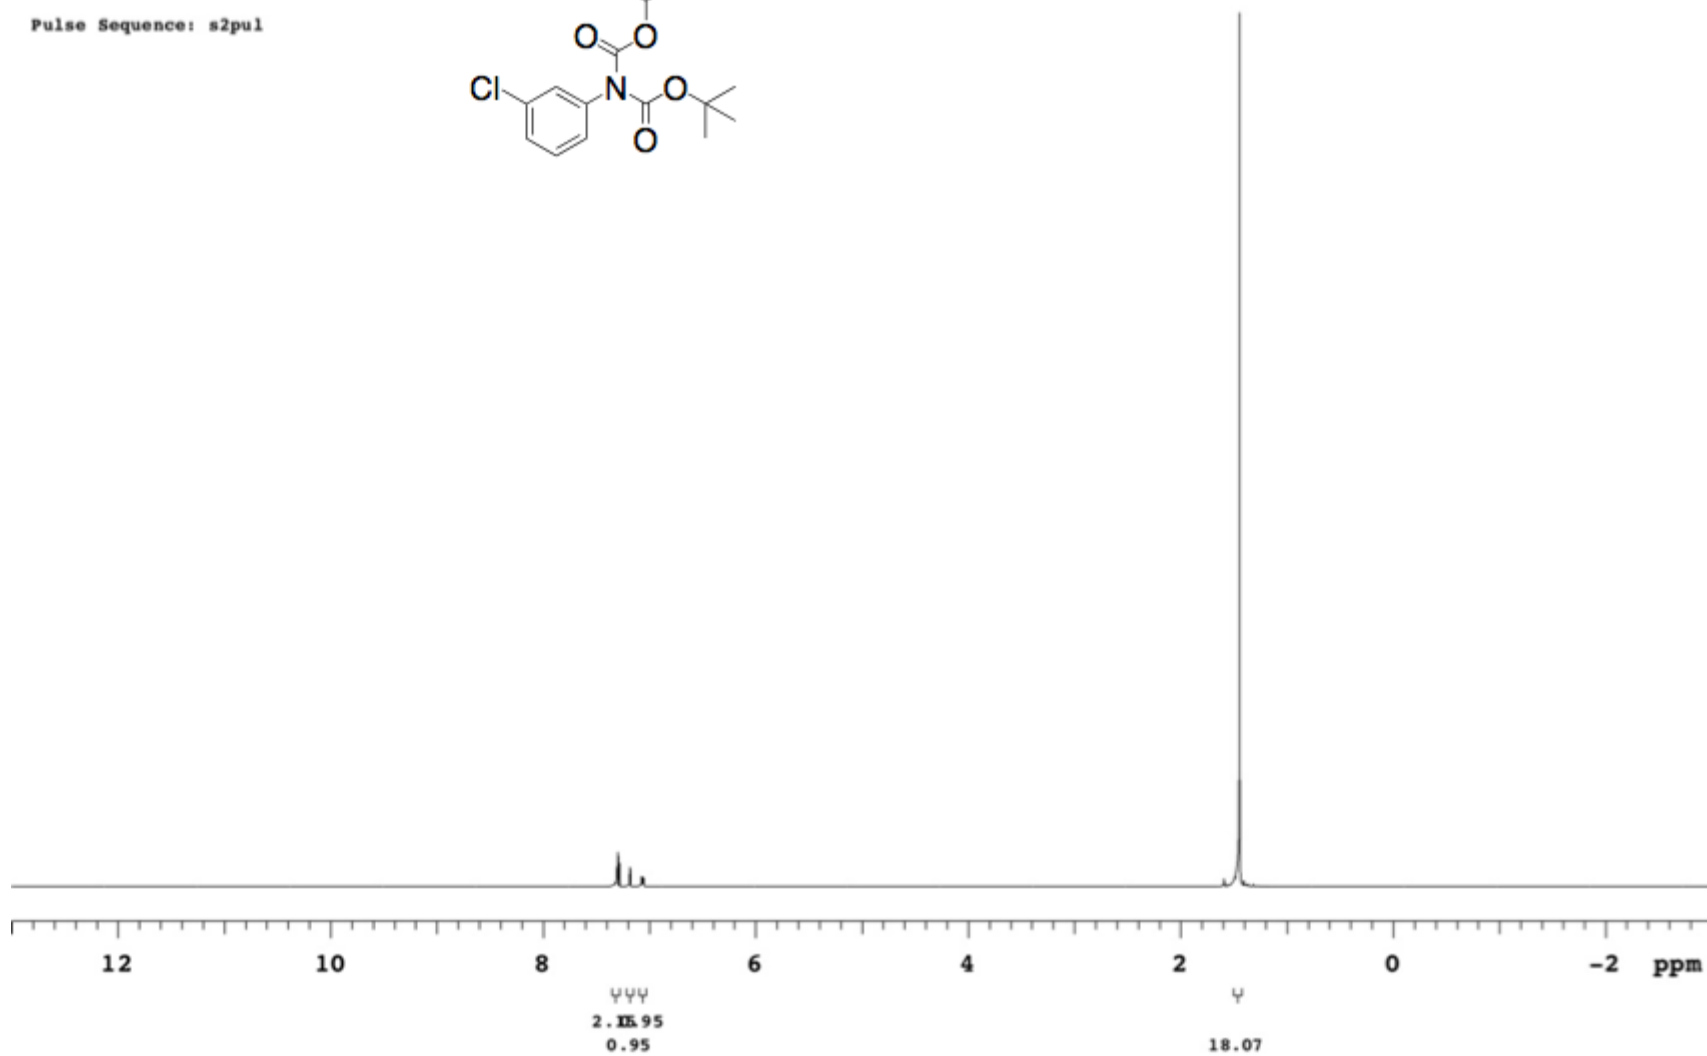

*Figure.* 500 MHz <sup>1</sup>H NMR spectrum of 6

126MHz CDCl<sub>3</sub>=77p 13C  
3-Cl-N(Boc)2-aniline  
Pulse Sequence: s2pul

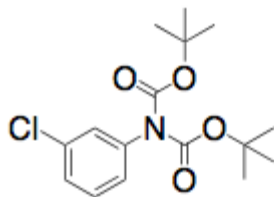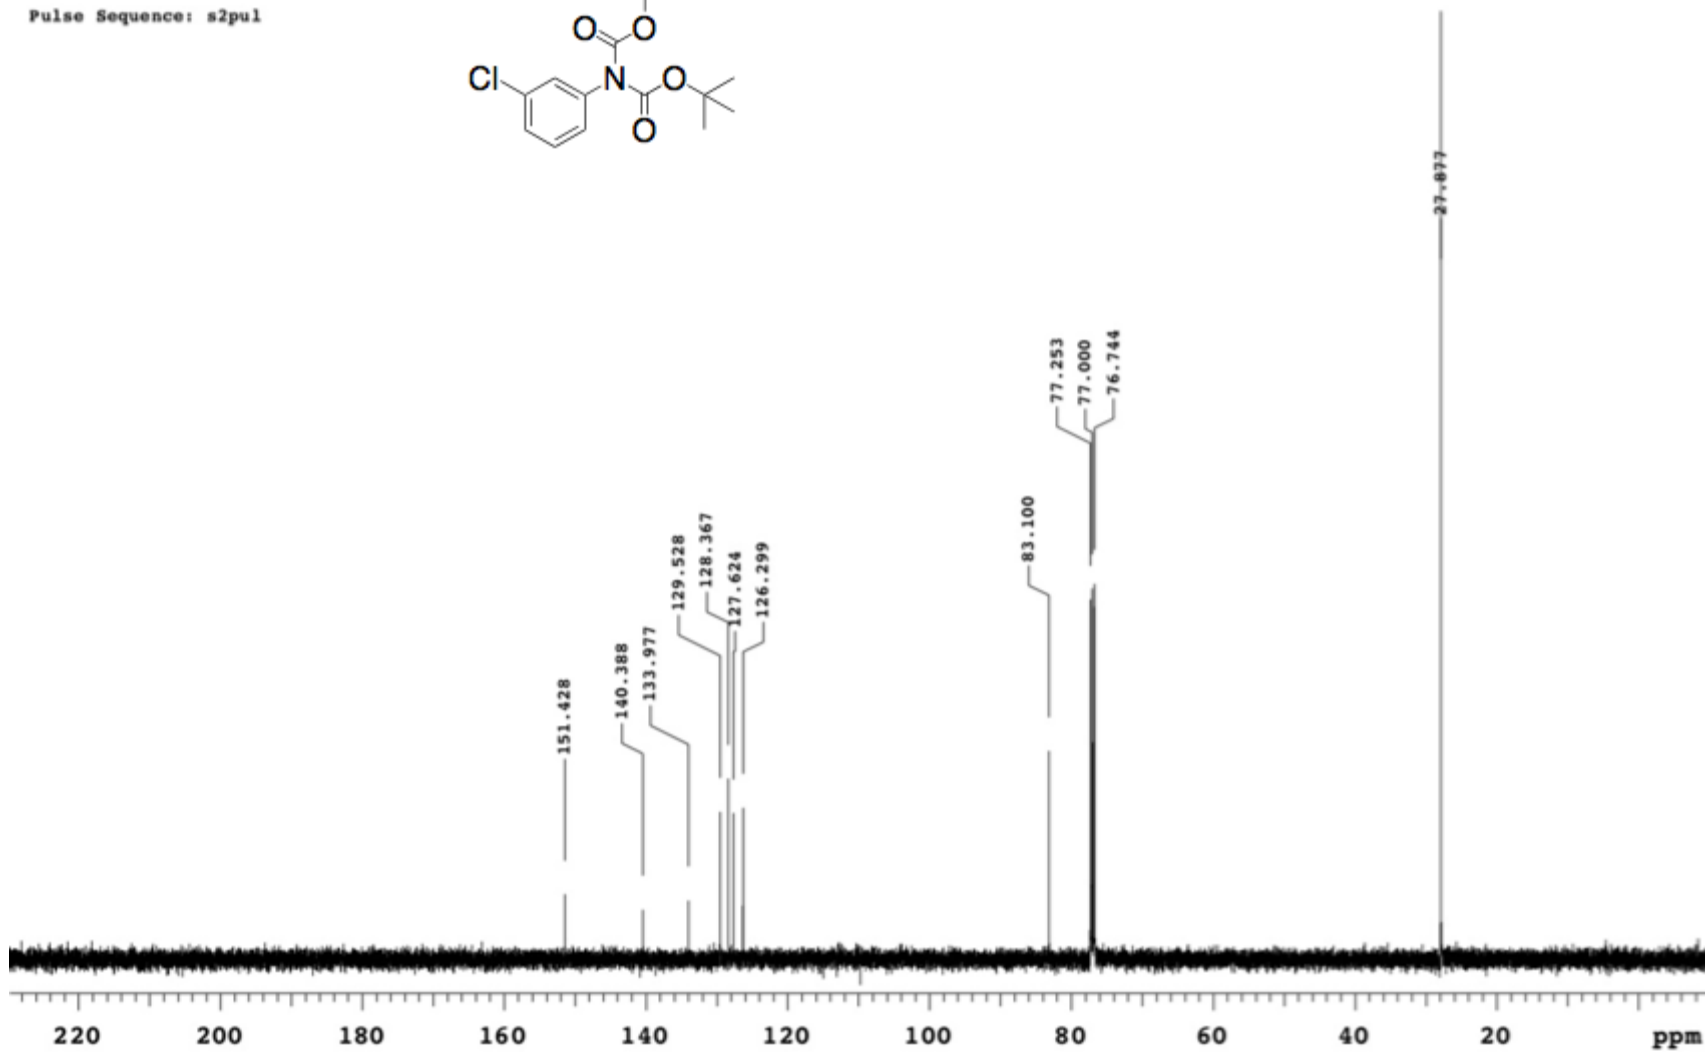

Figure. 126 MHz <sup>13</sup>C NMR spectrum of 6

500MHz CDCl3=7.24p 1H  
3-chloro-NHBoc-aniline

Pulse Sequence: s2pul

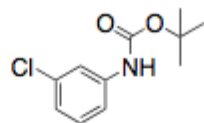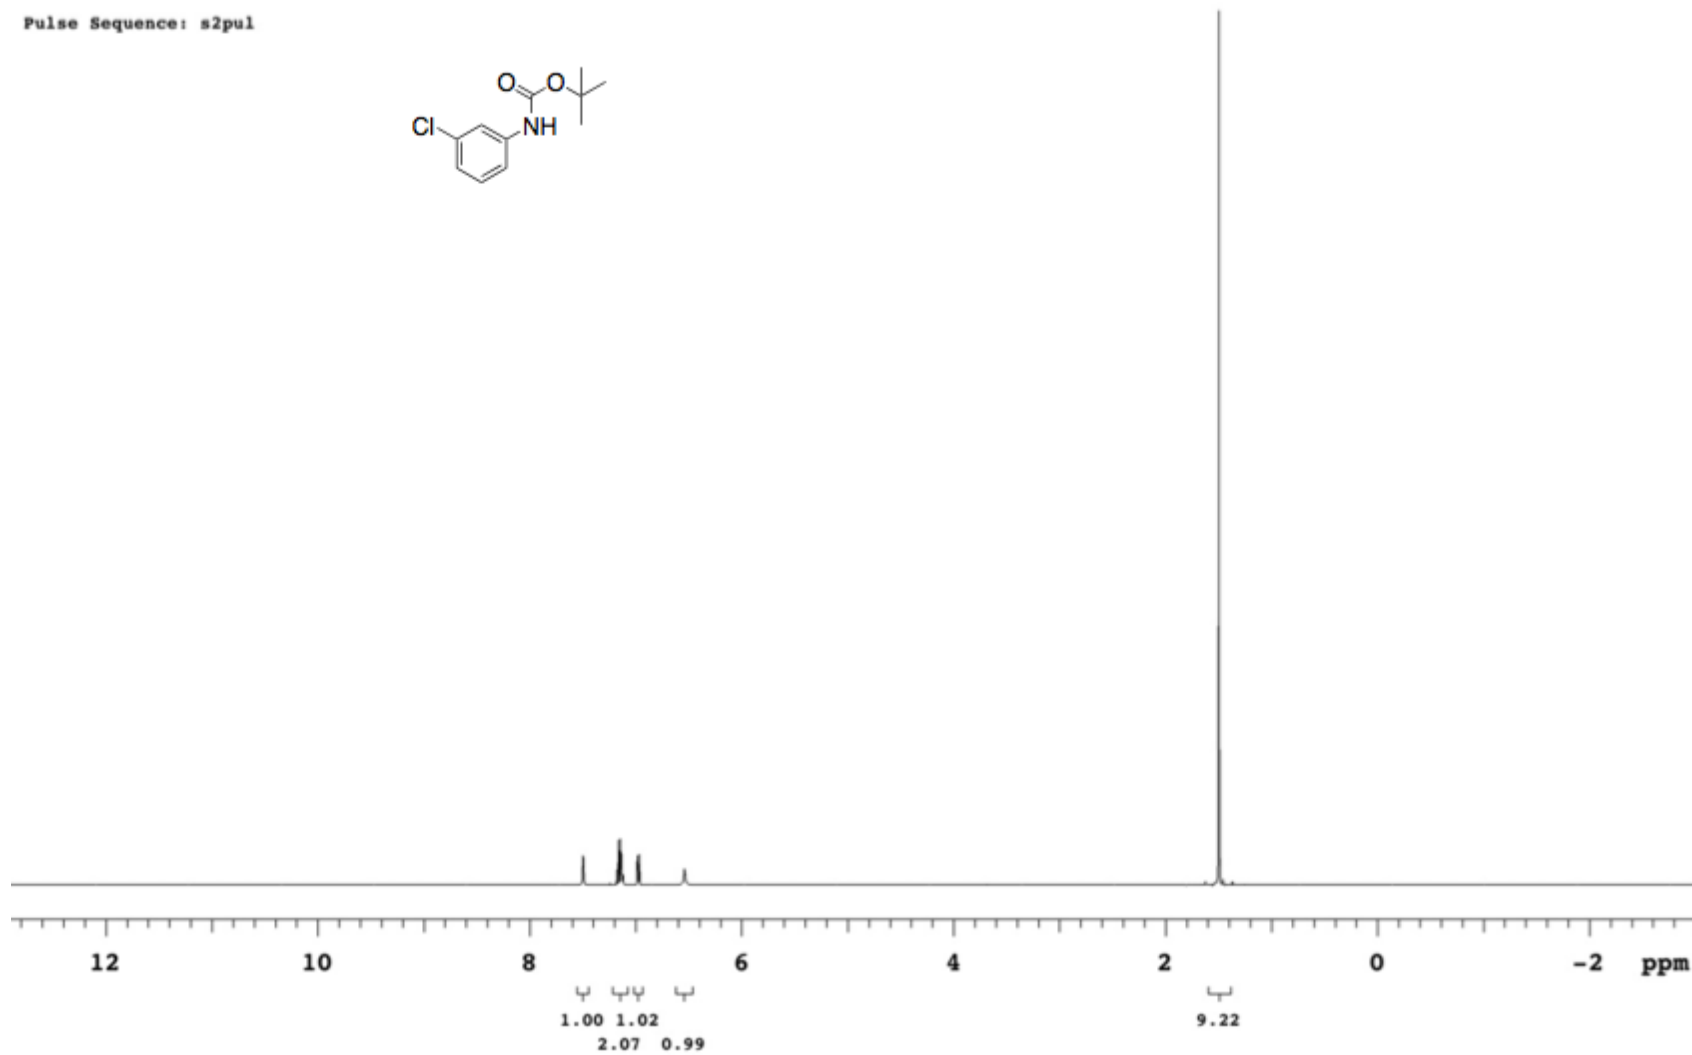

Figure. 500 MHz  $^1\text{H}$  NMR spectrum of 7



126MHz CDCl<sub>3</sub>=77p 13C  
3-chloro-NHBoc-aniline

Pulse Sequence: s2pul

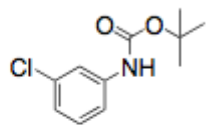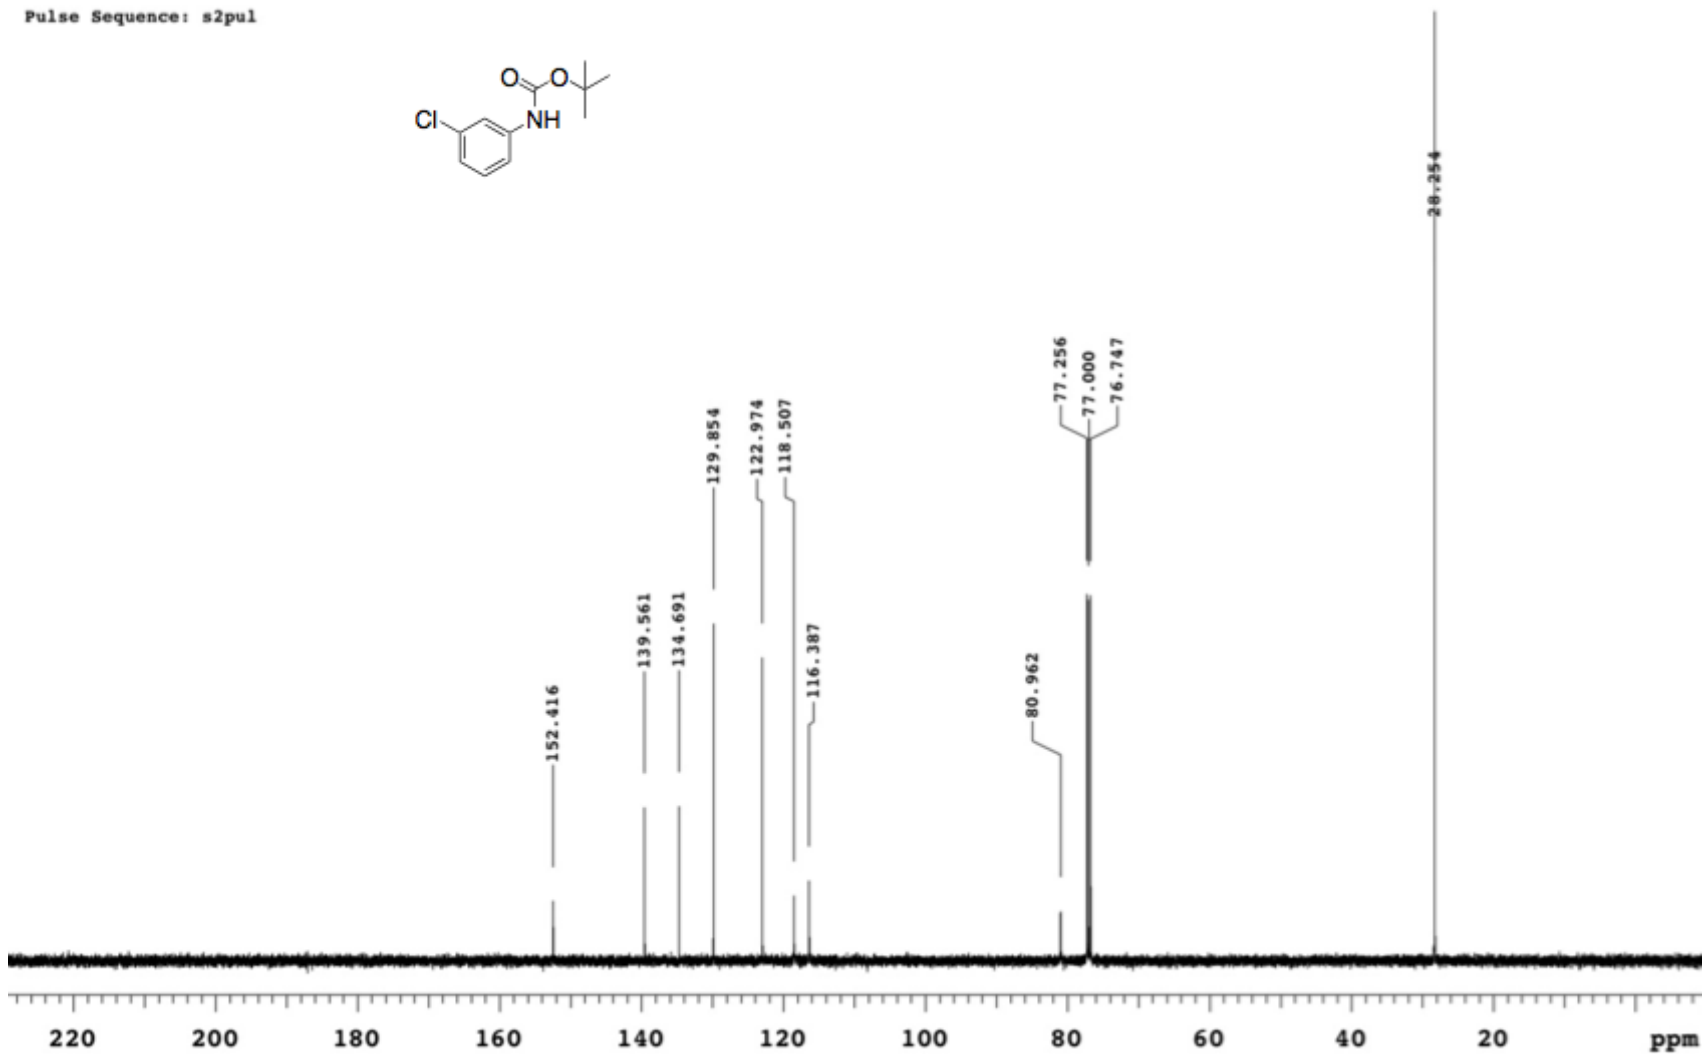

Figure. 126 MHz <sup>13</sup>C NMR spectrum of 7

500MHz CDCl3=7.24p 1H  
N-Boc-N-Me-3-chloroaniline

Pulse Sequence: s2pul

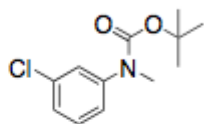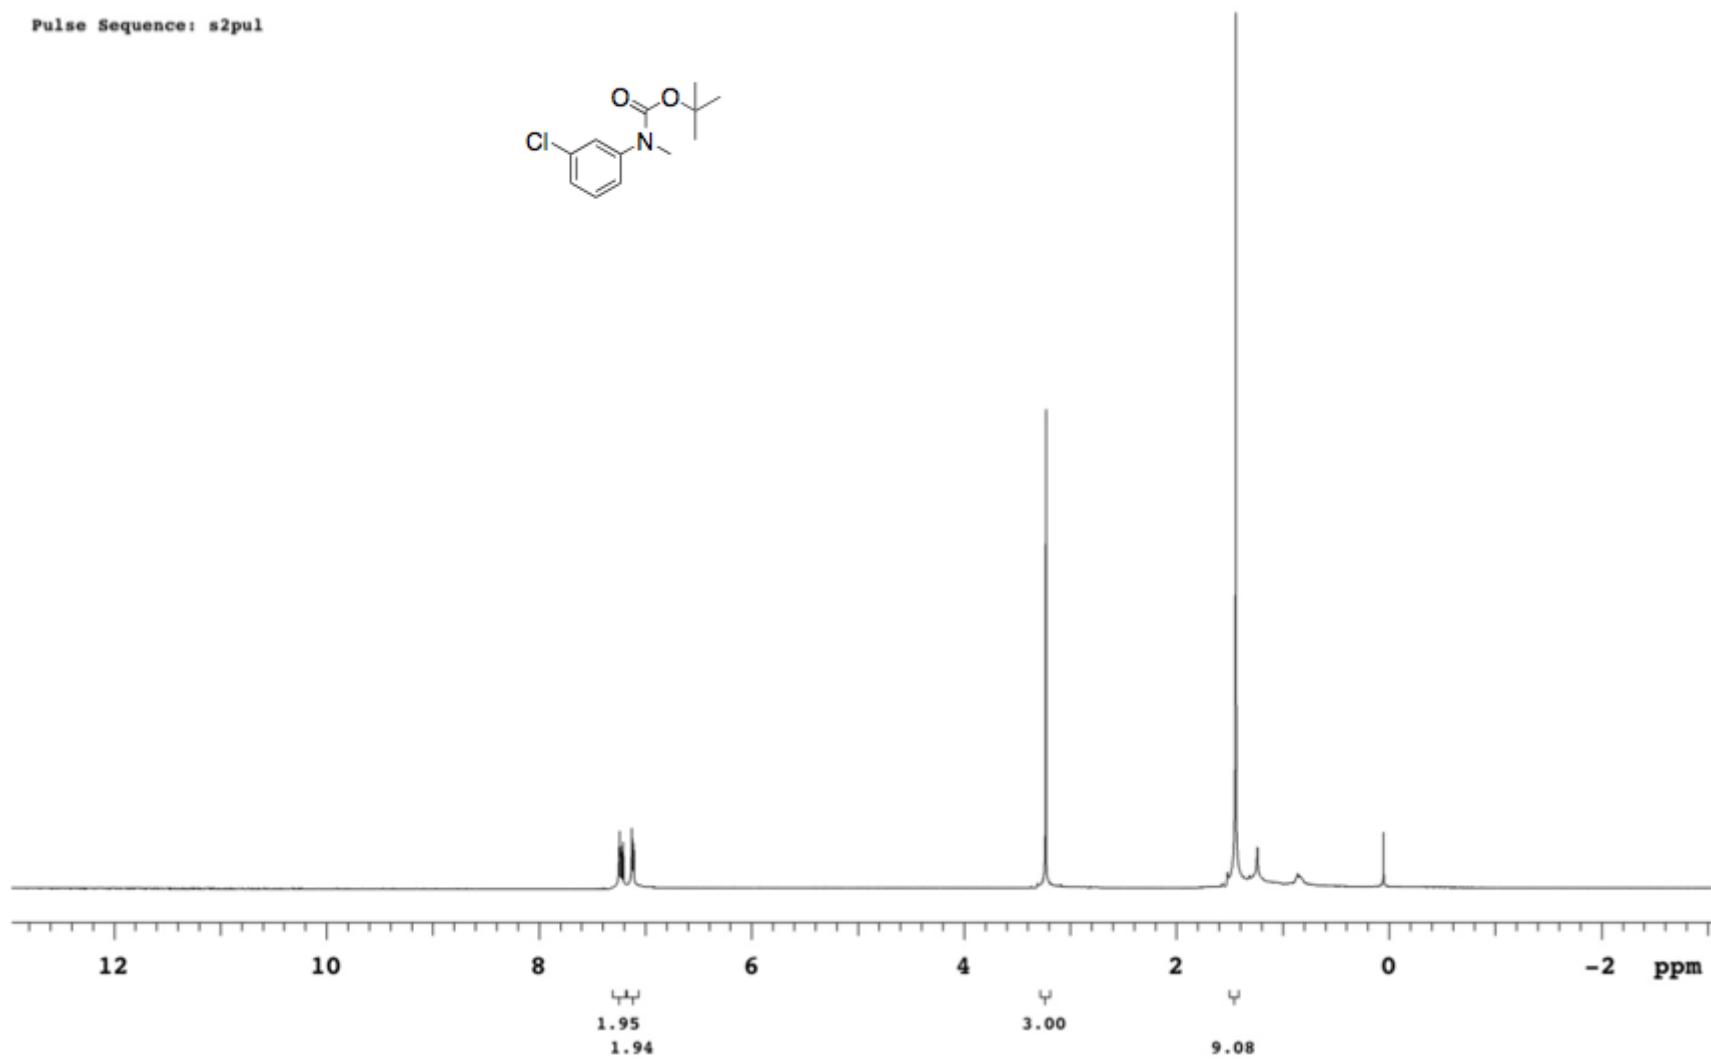

500MHz CDCl3=7.24p 1H  
4-chloro-NHBoc-aniline

Pulse Sequence: s2pul

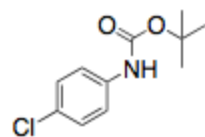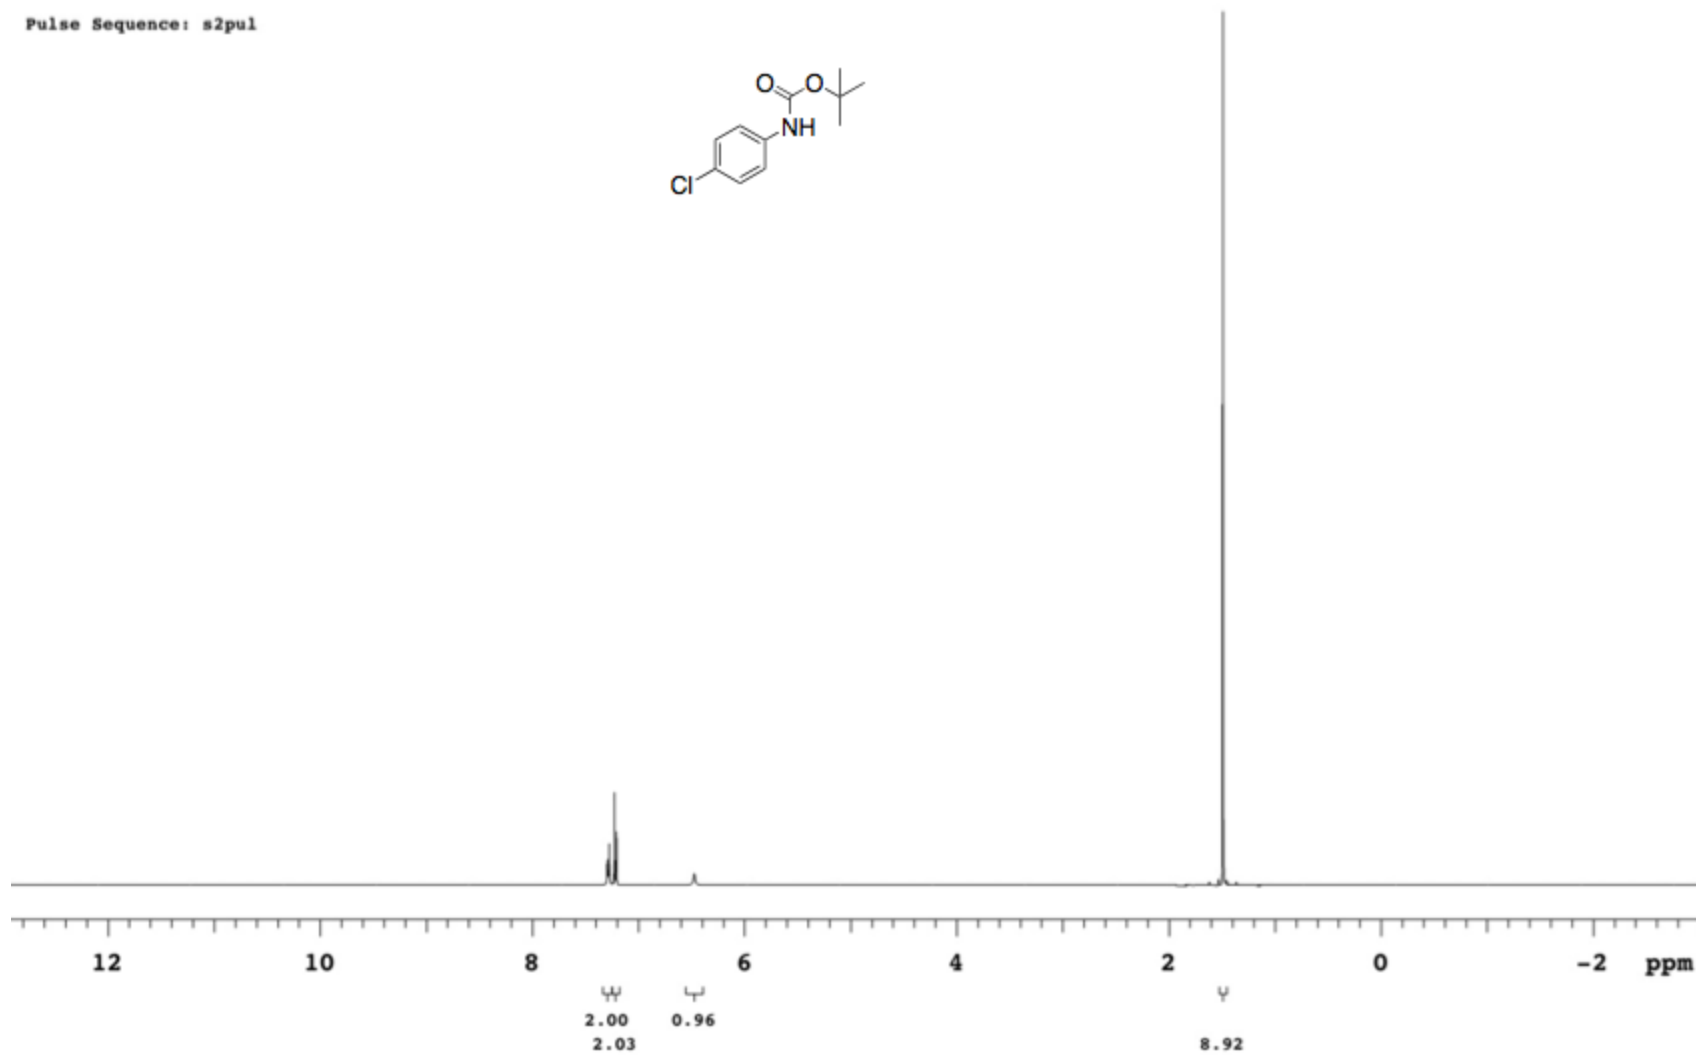

*Figure.* 500 MHz <sup>1</sup>H NMR spectrum

126MHz CDCl<sub>3</sub>=77p 13C  
4-chloro-NHoc-aniline

Pulse Sequence: s2pul

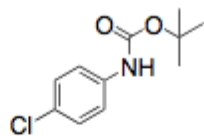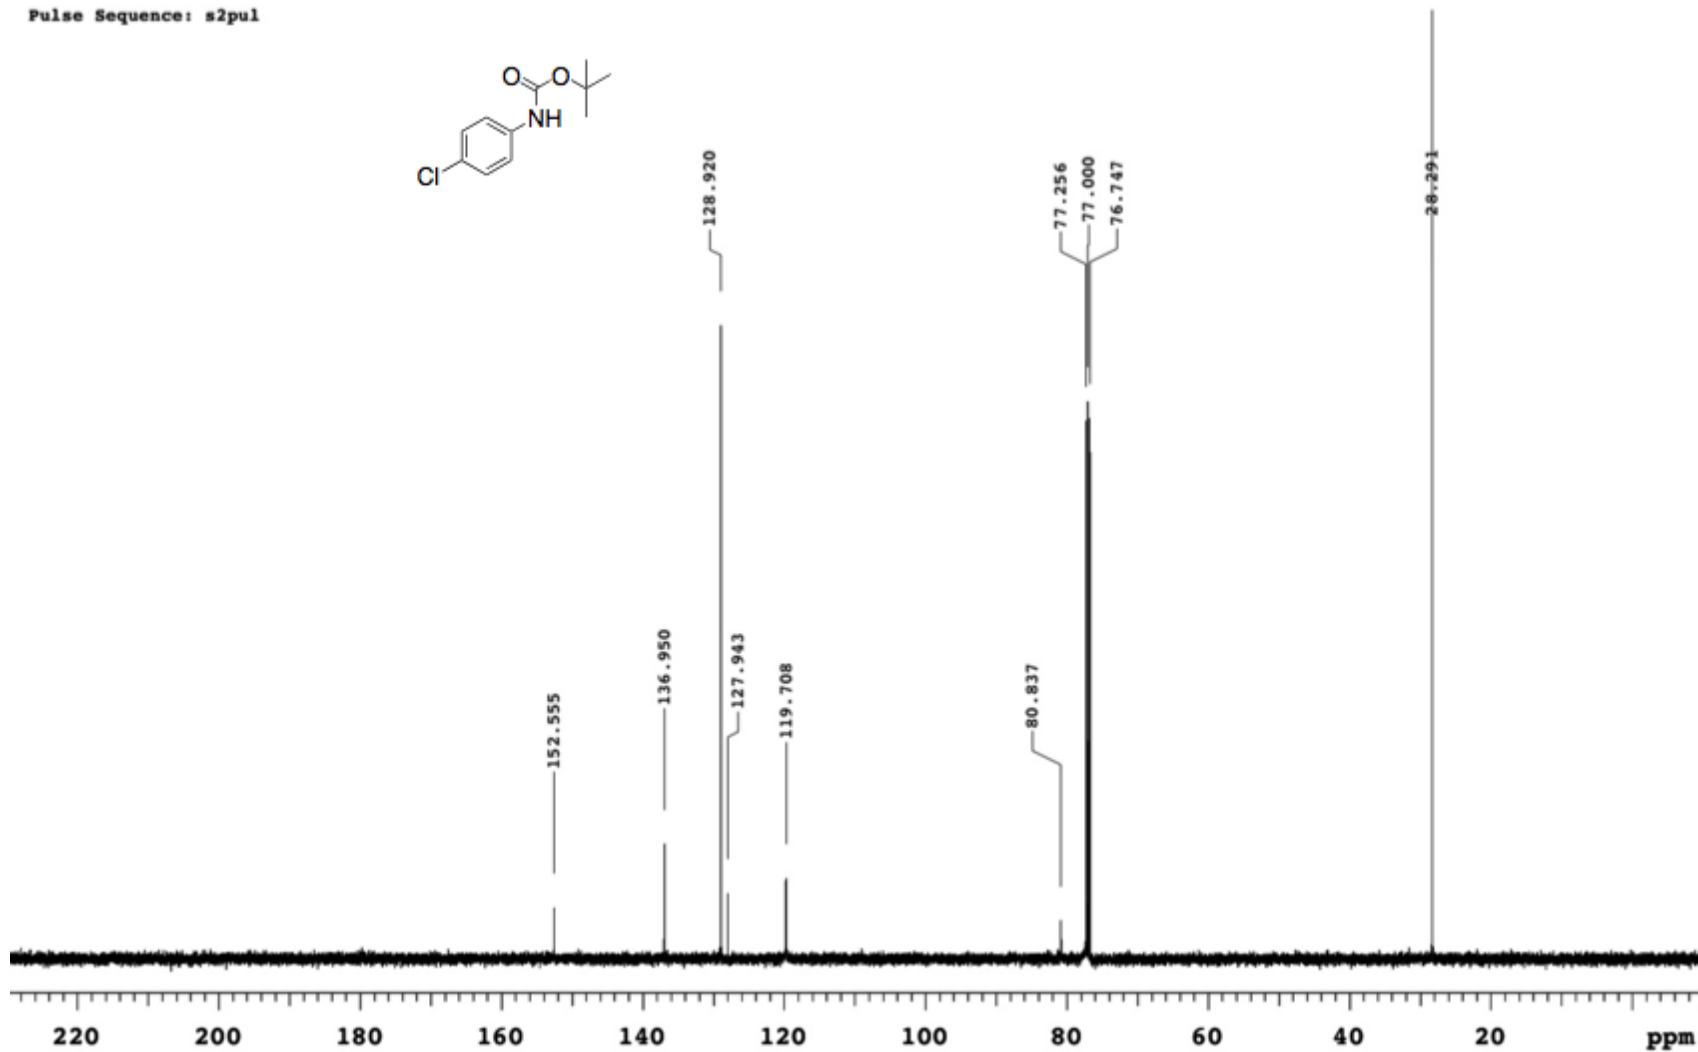

Figure. 126 MHz <sup>13</sup>C NMR spectrum

500MHz CDCl3=7.24p 1H  
4-bromo-NHBoc-aniline

Pulse Sequence: s2pul

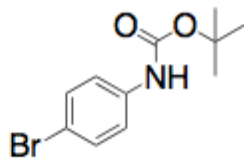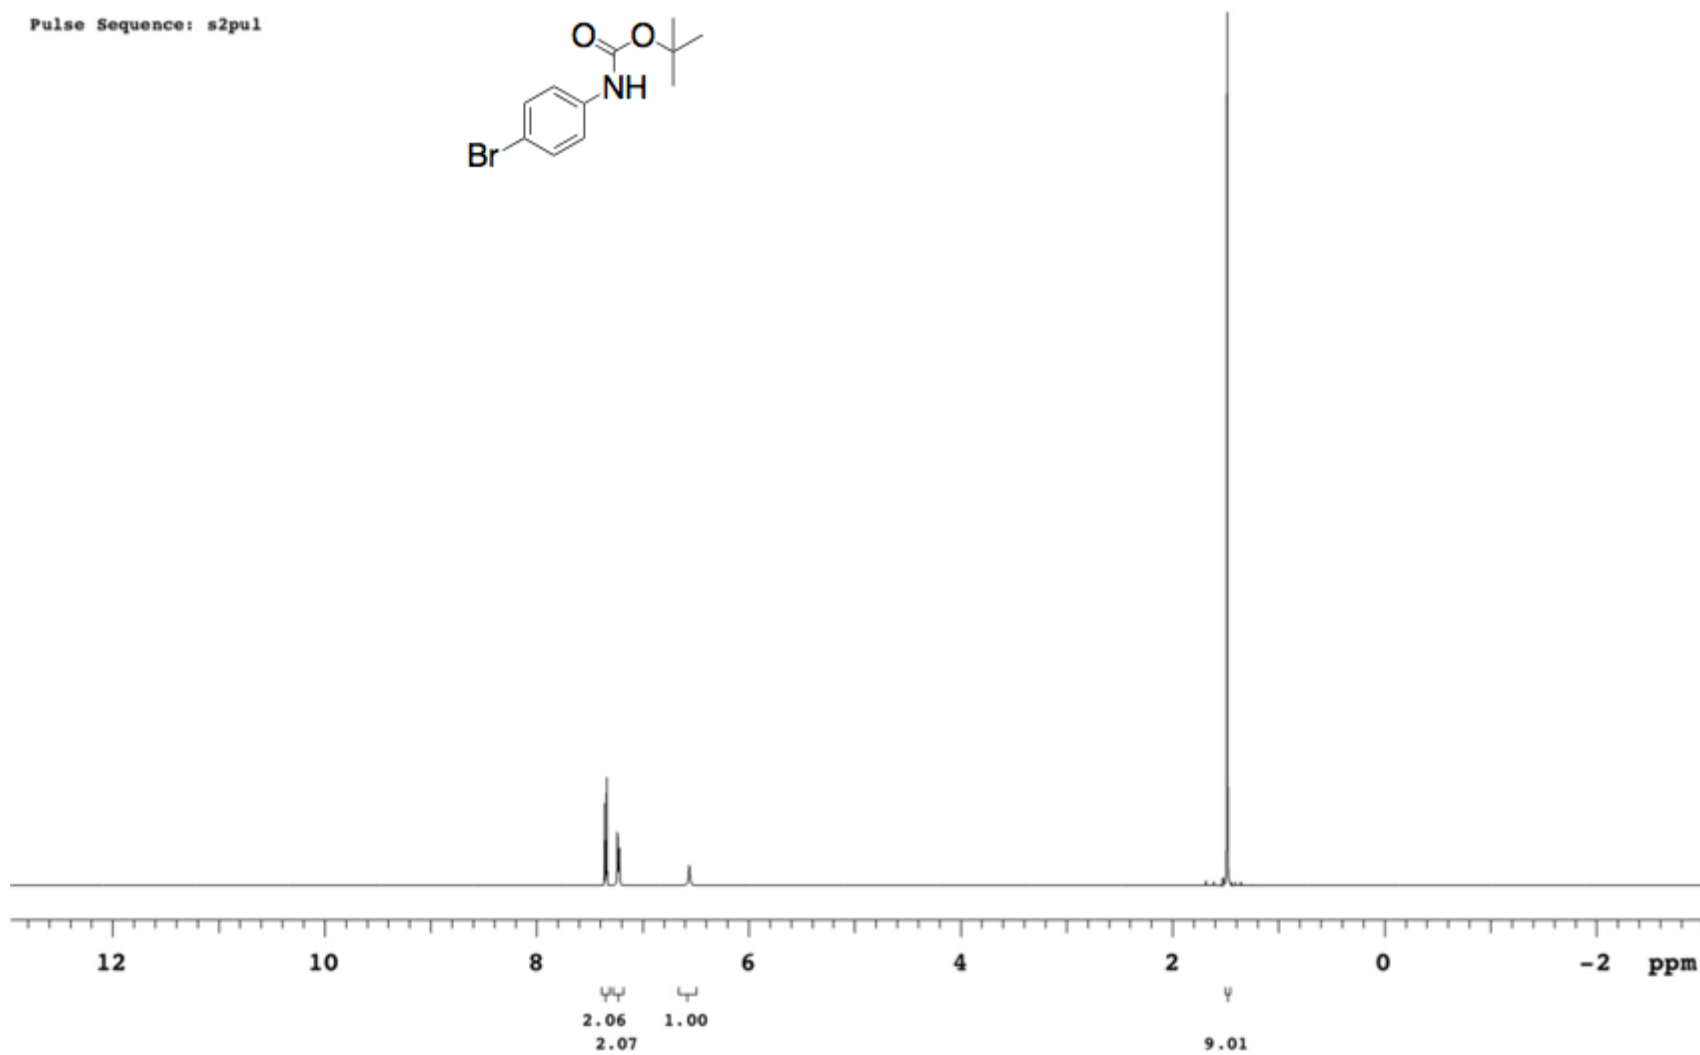

*Figure.* 500 MHz <sup>1</sup>H NMR spectrum

126MHz CDCl<sub>3</sub>-77p 13C  
4-bromo-NHoc-aniline

Pulse Sequence: s2pul

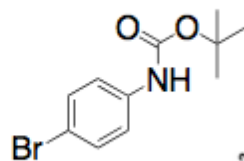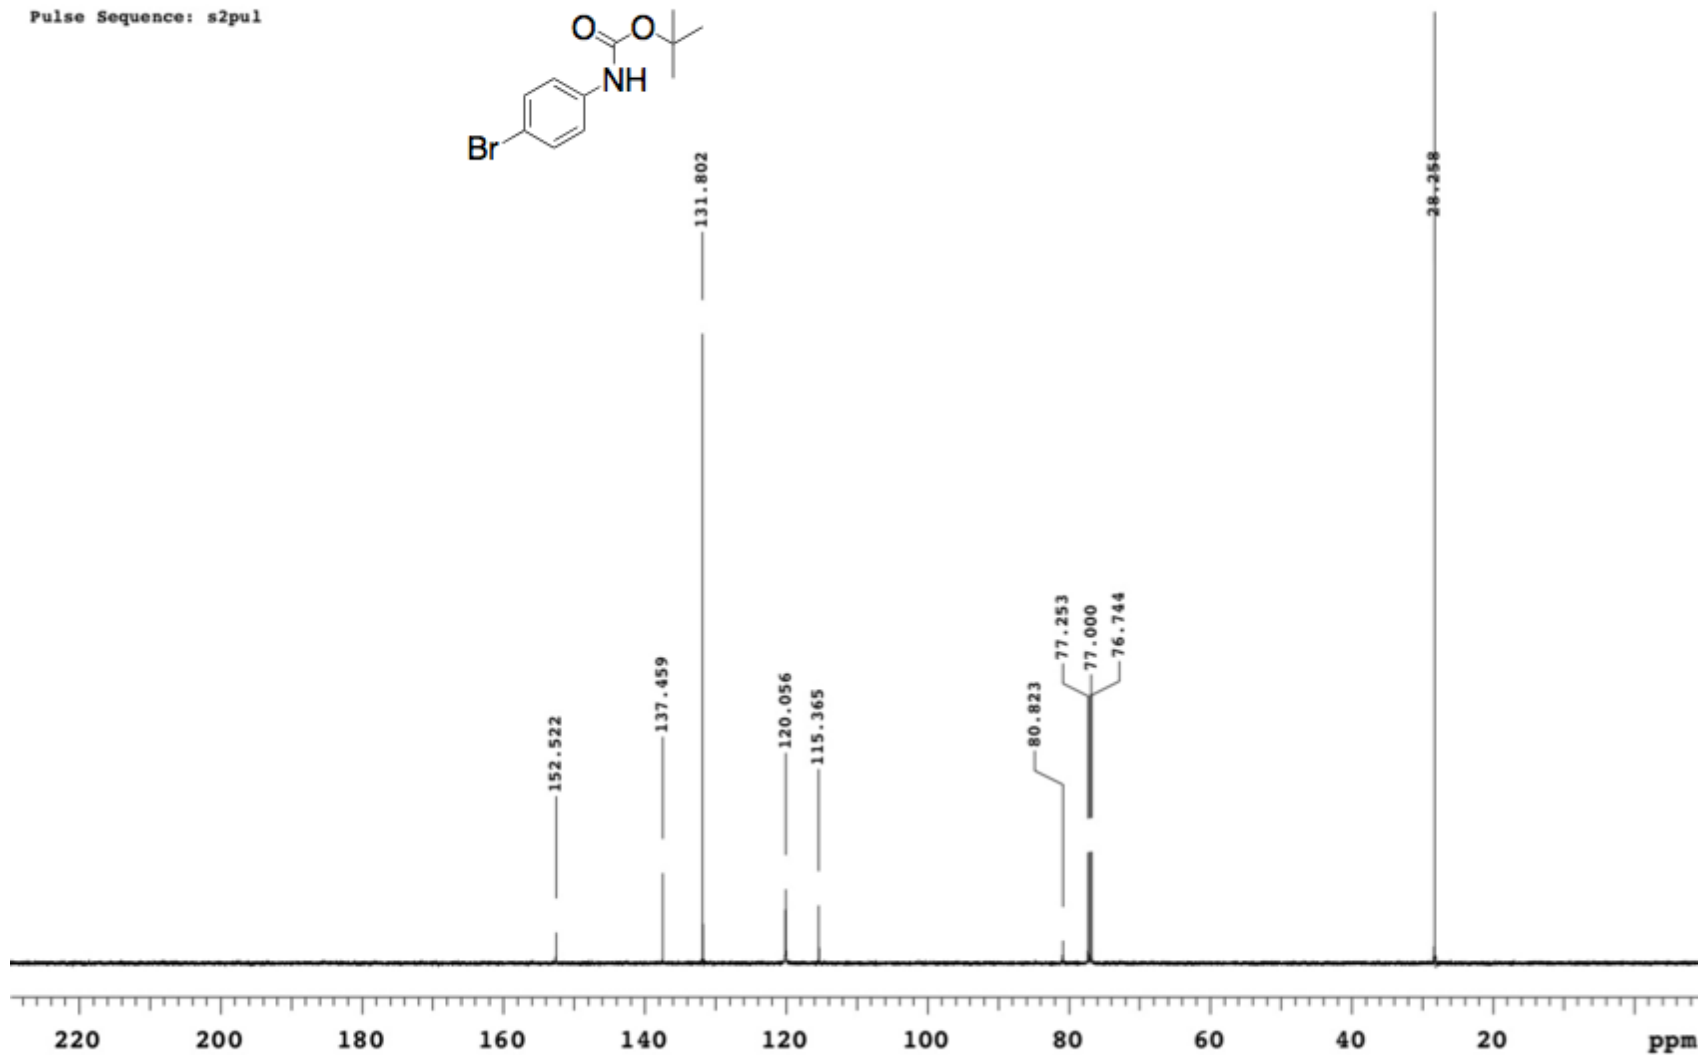

Figure. 126 MHz <sup>13</sup>C NMR spectrum

500MHz CDCl<sub>3</sub>=7.24p 1H  
N-Boc-4-chloro-3-fluoroaniline

Pulse Sequence: s2pul

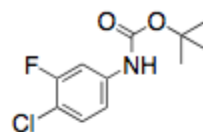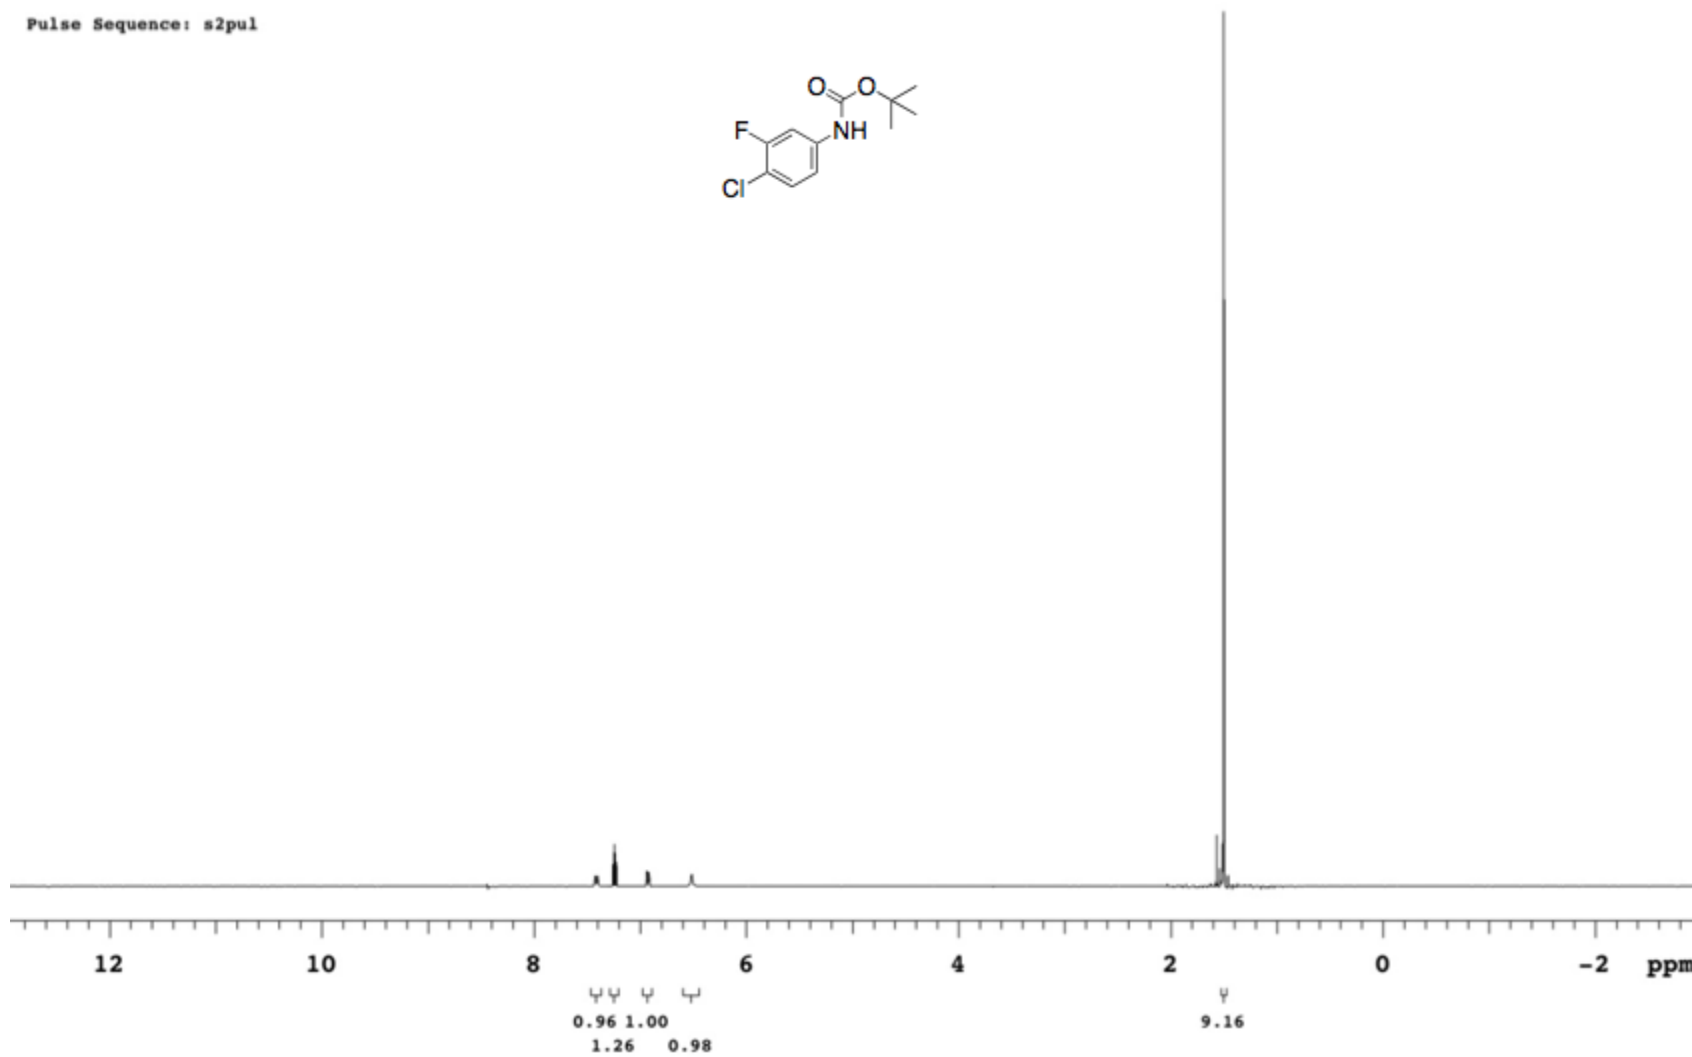

*Figure.* 500 MHz <sup>1</sup>H NMR spectrum

126MHz CDCl3=77p 1H  
N-Boc-4-chloro-3-fluoroaniline

Pulse Sequence: s2pul

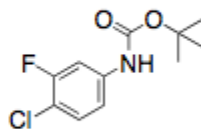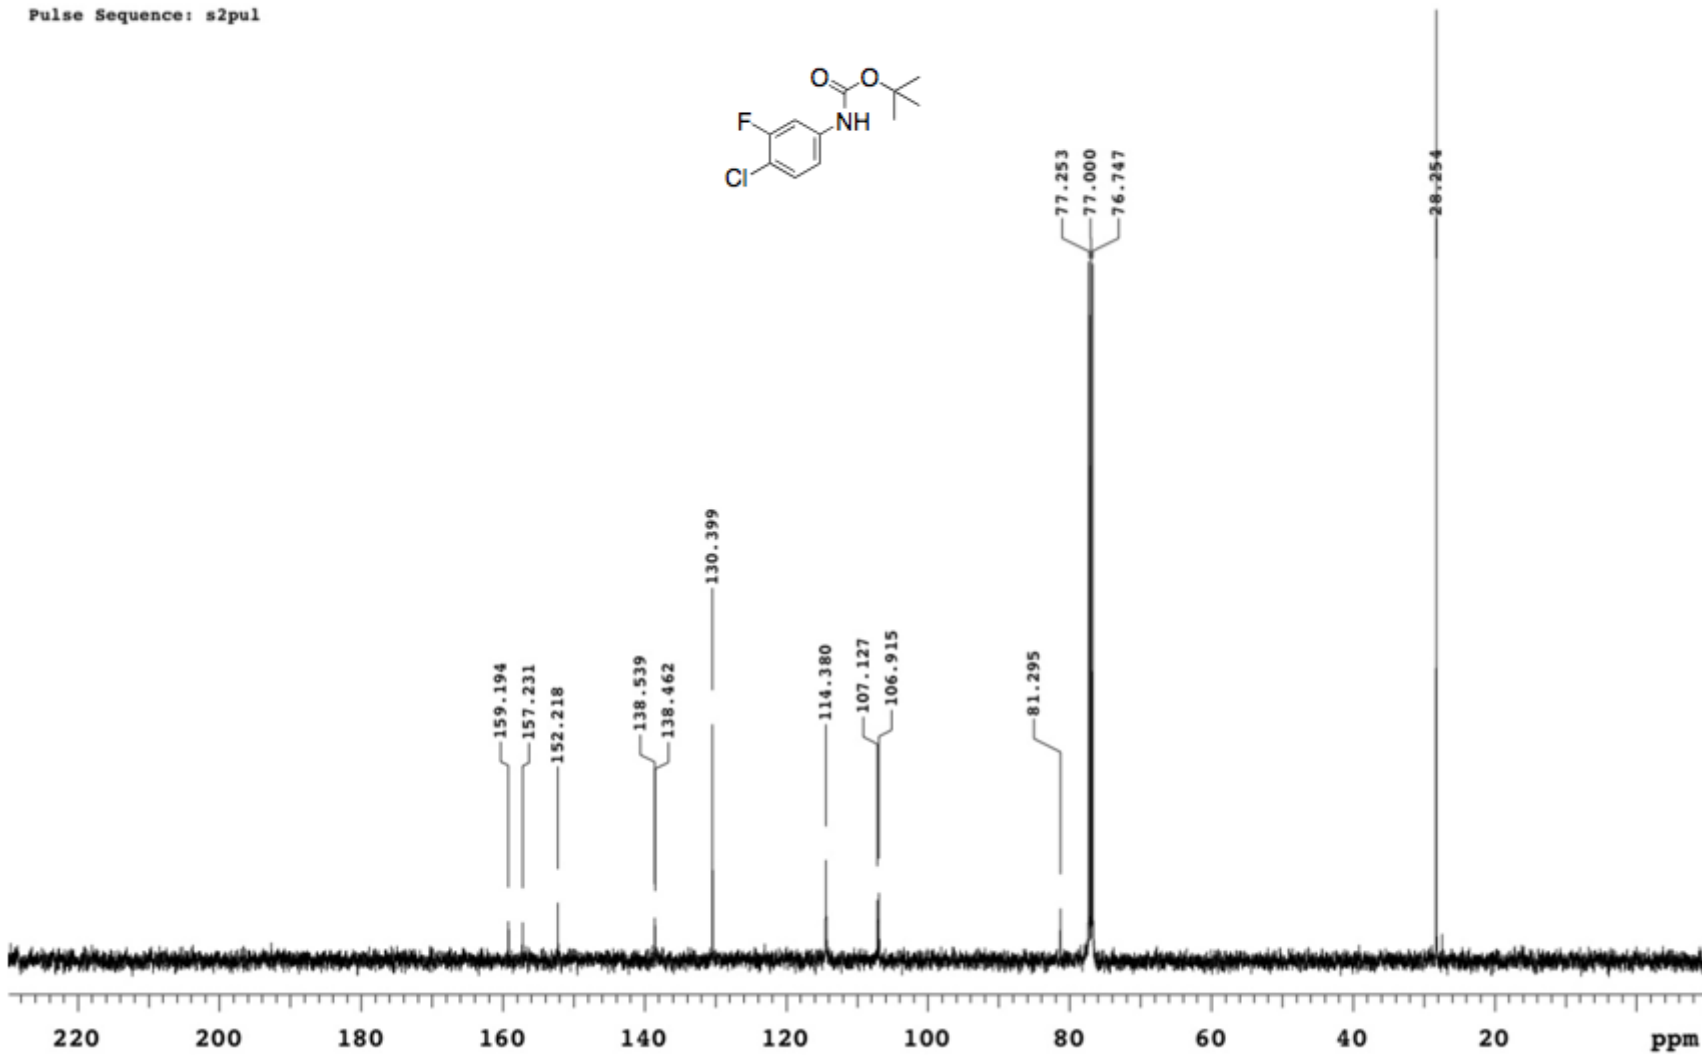

Figure. 126 MHz  $^{13}\text{C}$  NMR spectrum



500MHz CDCl<sub>3</sub>=7.24p 1H  
N-Boc-4-fluoro-3-methylaniline

Pulse Sequence: s2pul

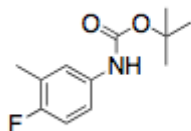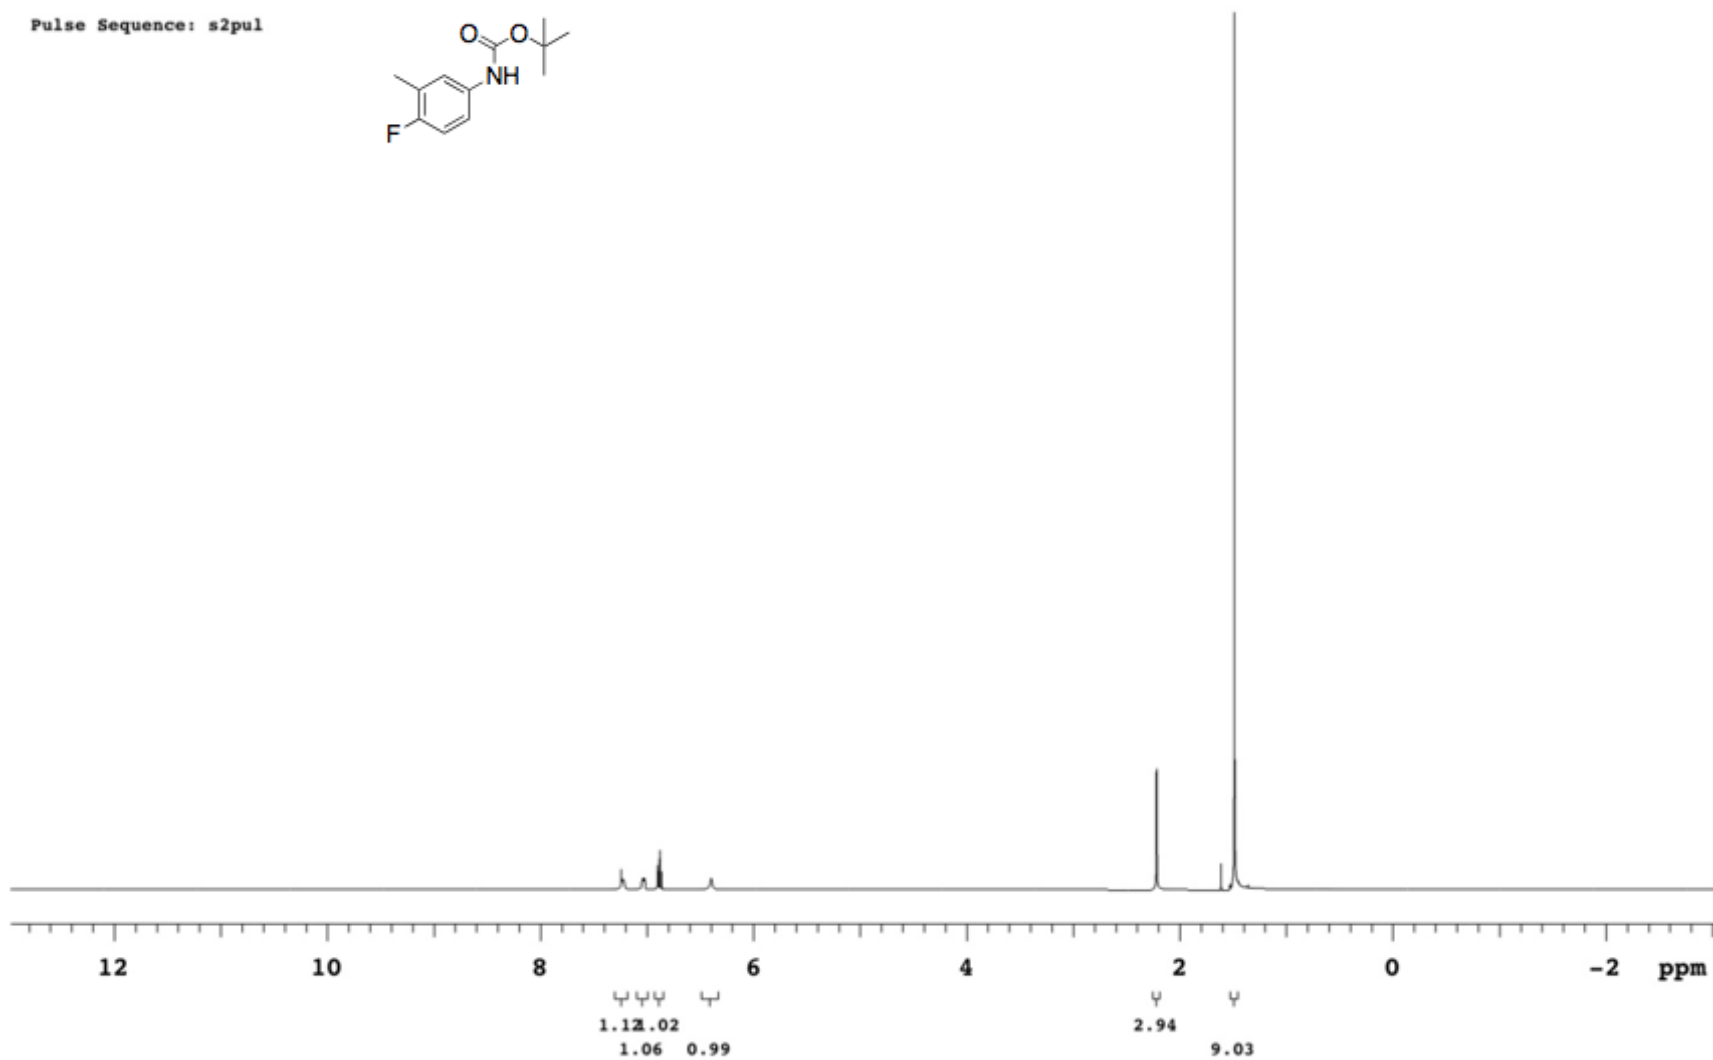

*Figure.* 500 MHz <sup>1</sup>H NMR spectrum

126MHz CDCl<sub>3</sub>=77p 13C  
N-Boc-4-fluoro-3-methylaniline

Pulse Sequence: s2pul

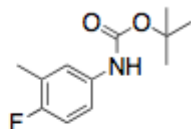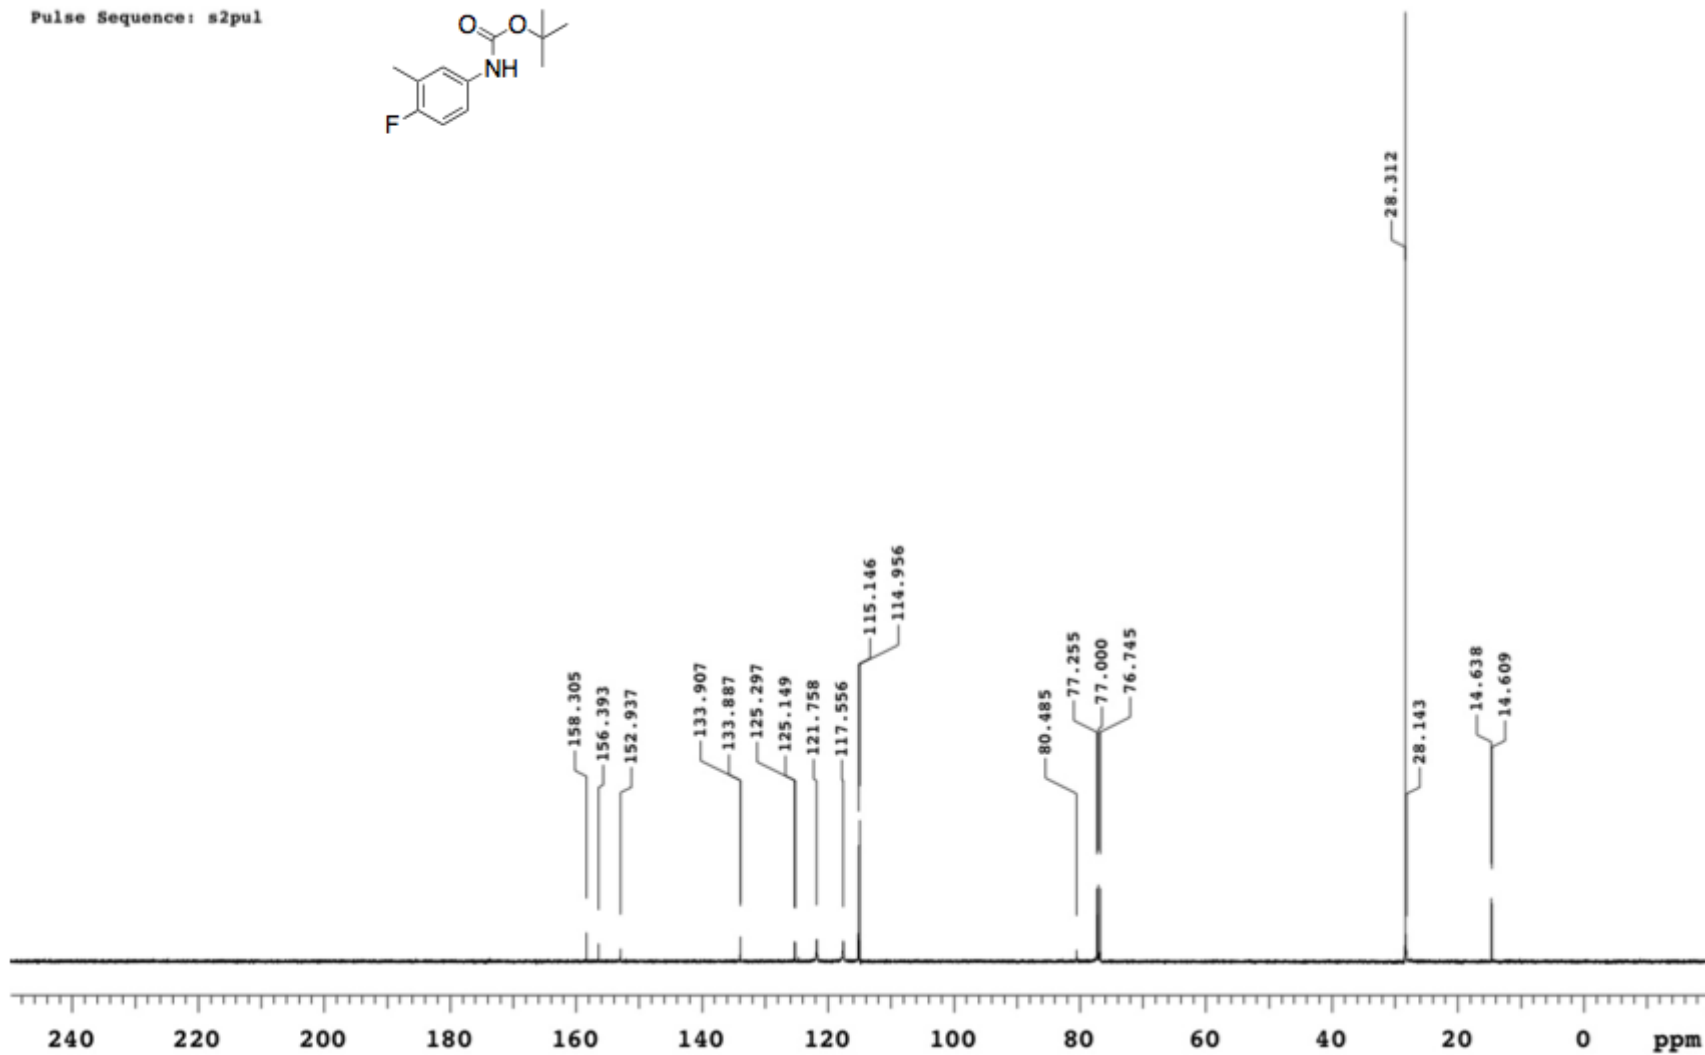

Figure. 126 MHz <sup>13</sup>C NMR spectrum

*Figure.* 500 MHz  $^1\text{H}$  NMR spectrum of **12a**

500MHz CDCl<sub>3</sub>=7.24p 1H  
4-OMe-3-Cl-NHBoc-aniline

Pulse Sequence: s2pul

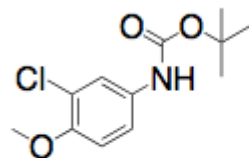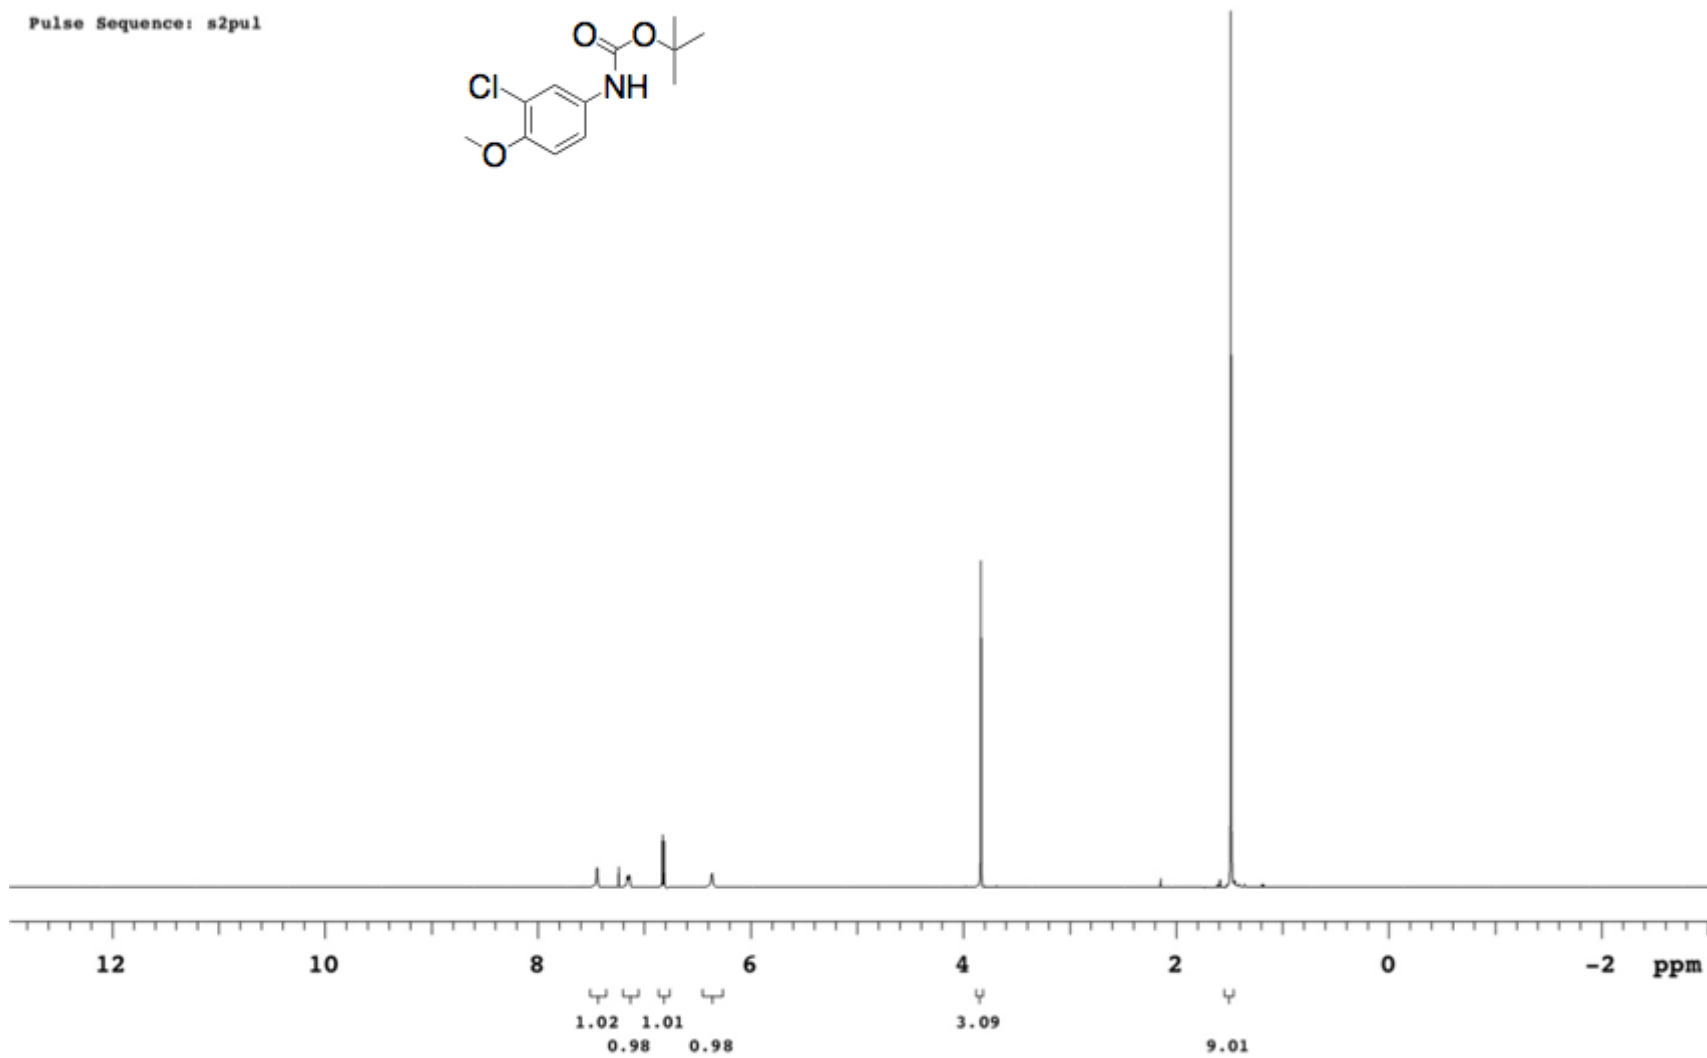

Figure. 500 MHz  $^1\text{H}$  NMR spectrum

126MHz CDCl<sub>3</sub>-77p 13C  
4-OMe-3-Cl-NHBoc-aniline

Pulse Sequence: s2pul

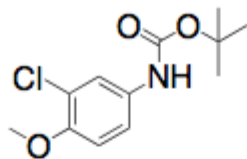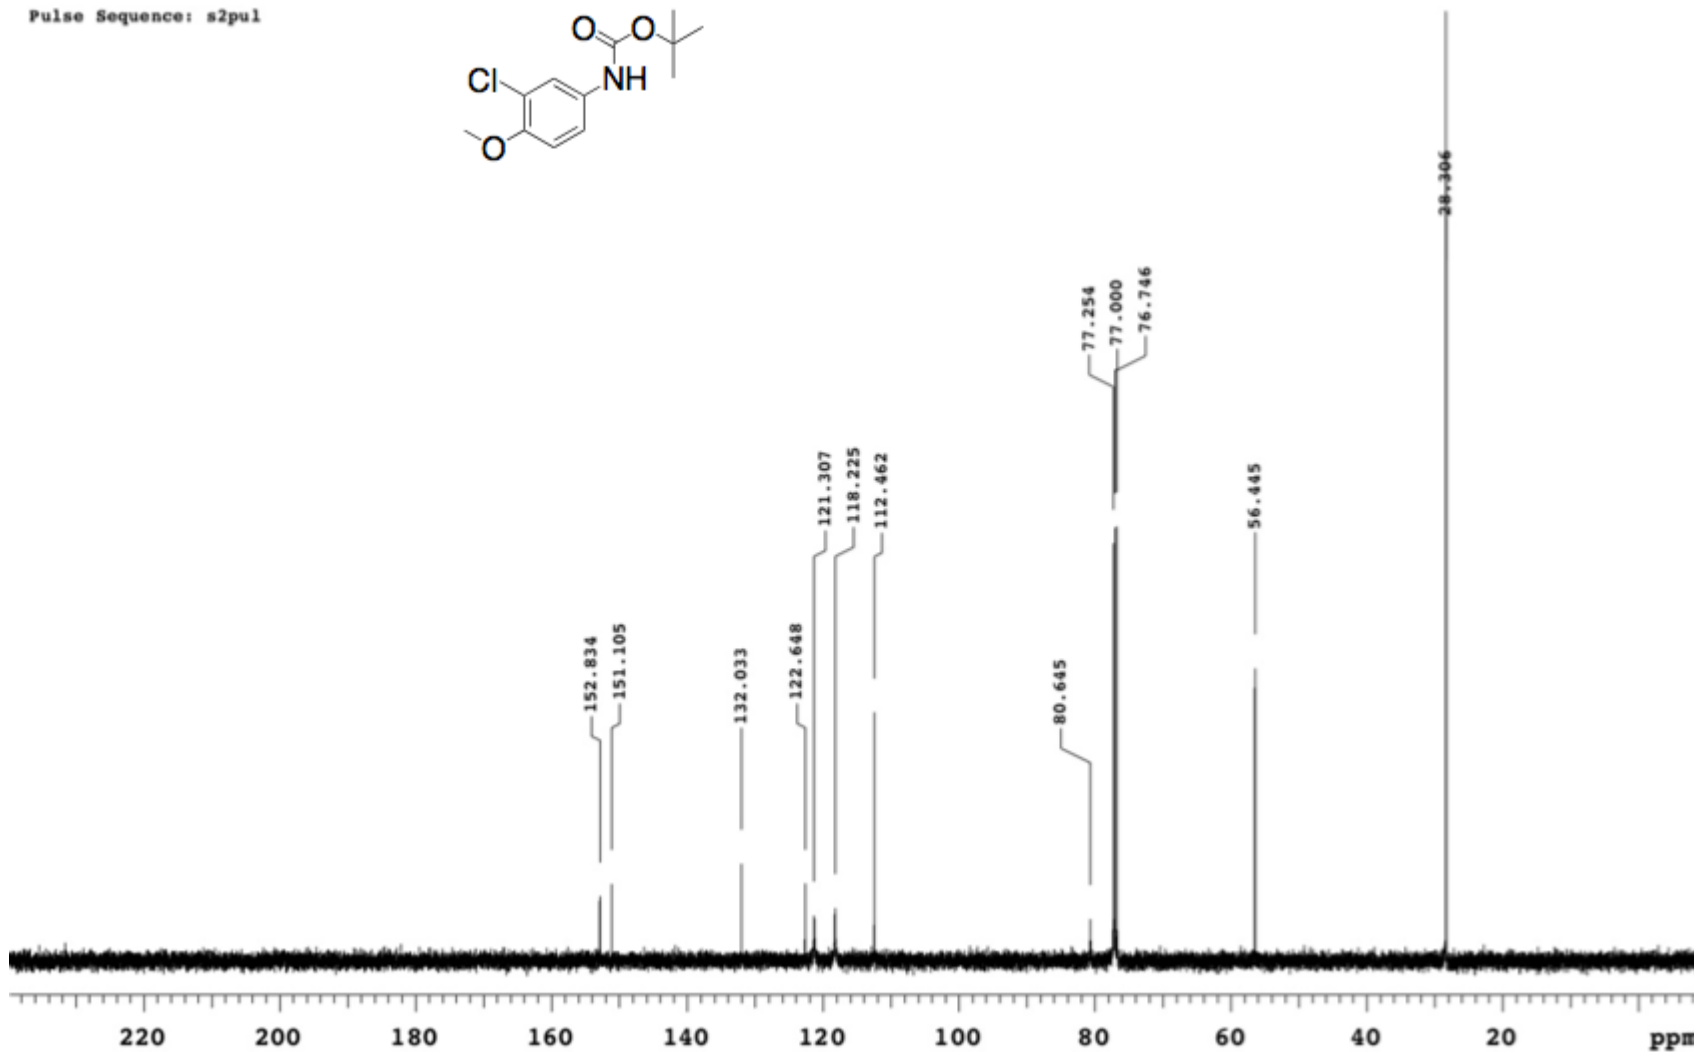

Figure. 126 MHz  $^{13}\text{C}$  NMR spectrum

500MHz CDCl3=7.24p 1H  
4-CF3-N-Boc-aniline

Pulse Sequence: s2pul

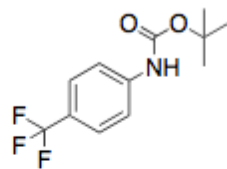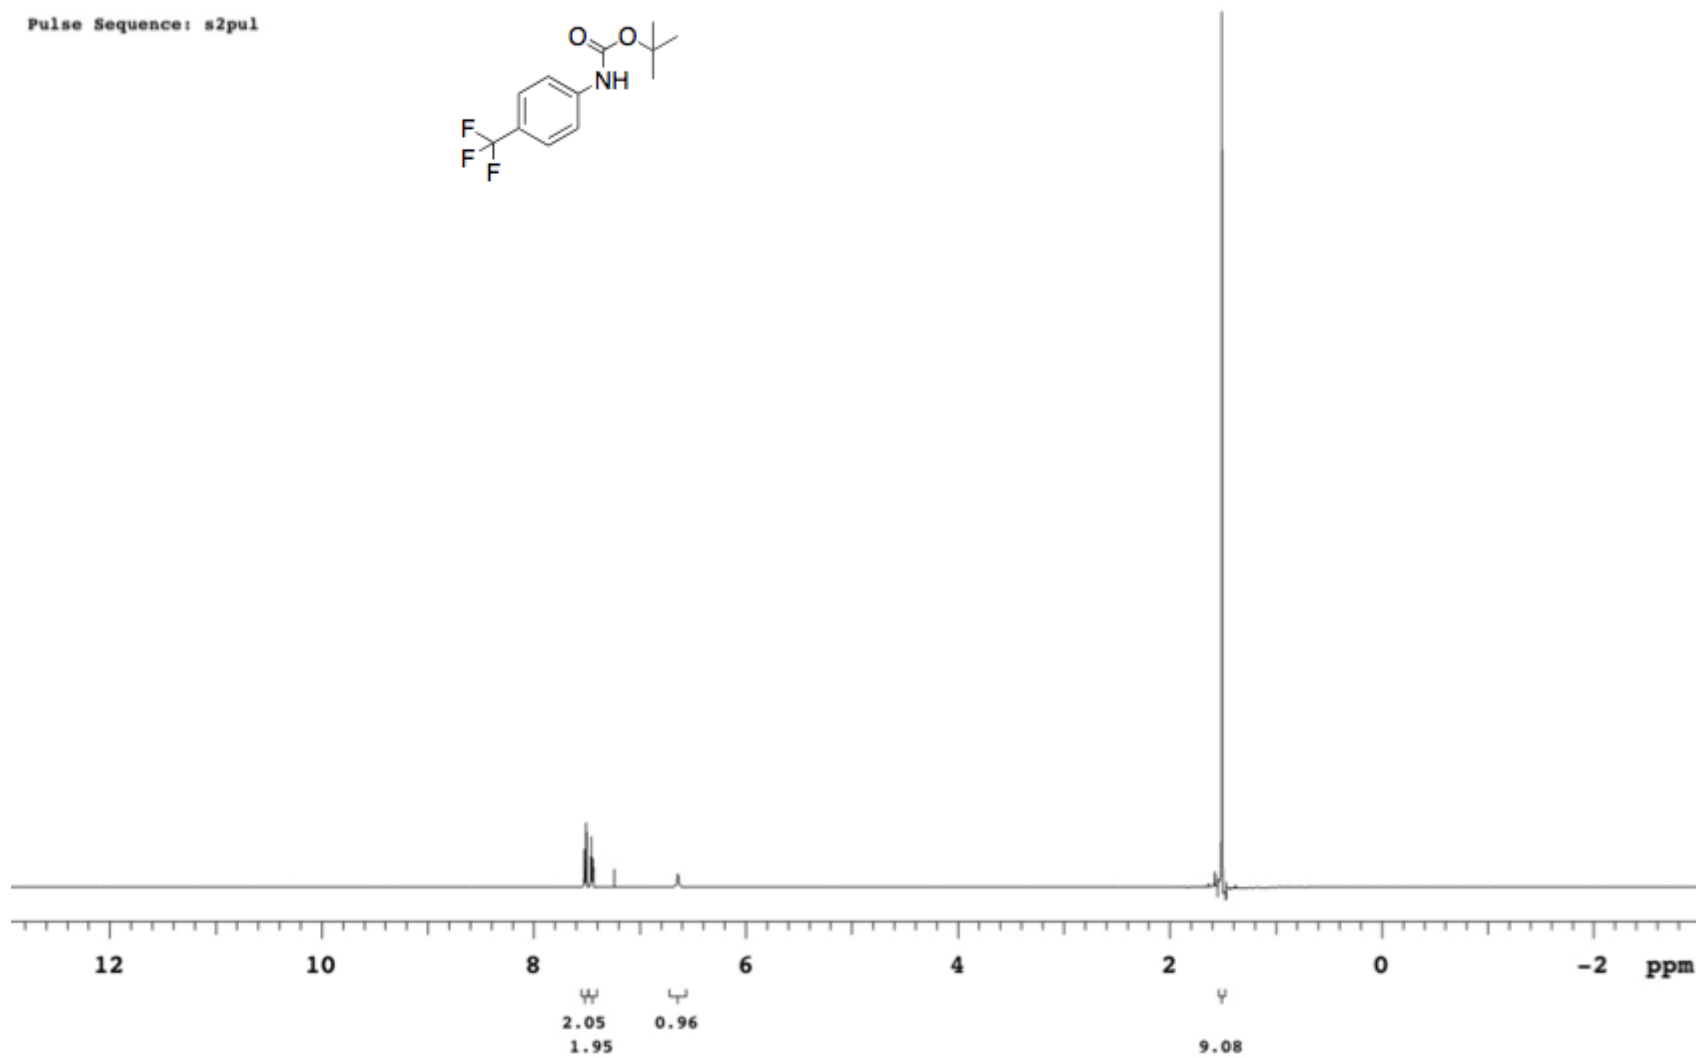

Figure. 500 MHz <sup>1</sup>H NMR spectrum

126MHz CDCl3=77p 13C  
4-CF3-N-Boc-aniline

Pulse Sequence: s2pul

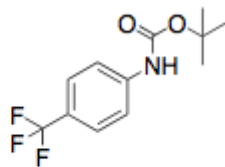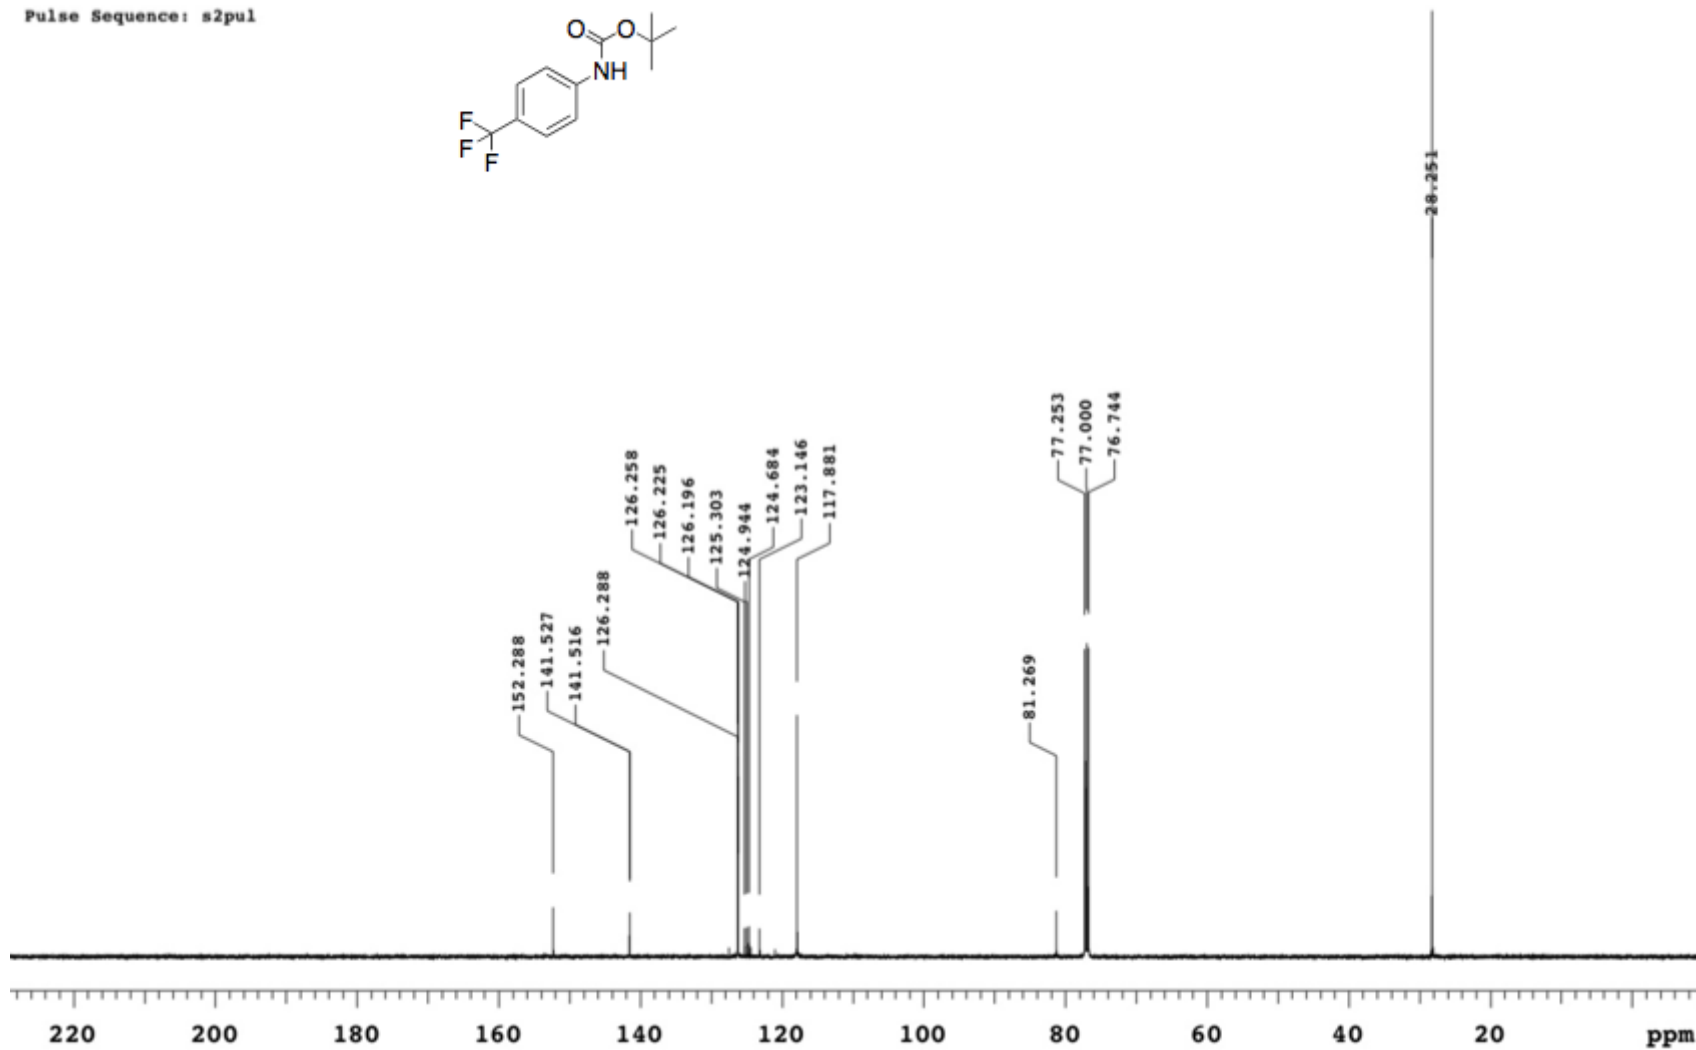

Figure. 126 MHz <sup>13</sup>C NMR spectrum

500MHz CDCl<sub>3</sub>=7.24p 1H  
O-CONMe<sub>2</sub>-N-Boc-4-aminophenol

Pulse Sequence: s2pul

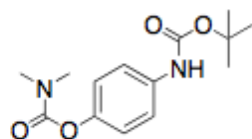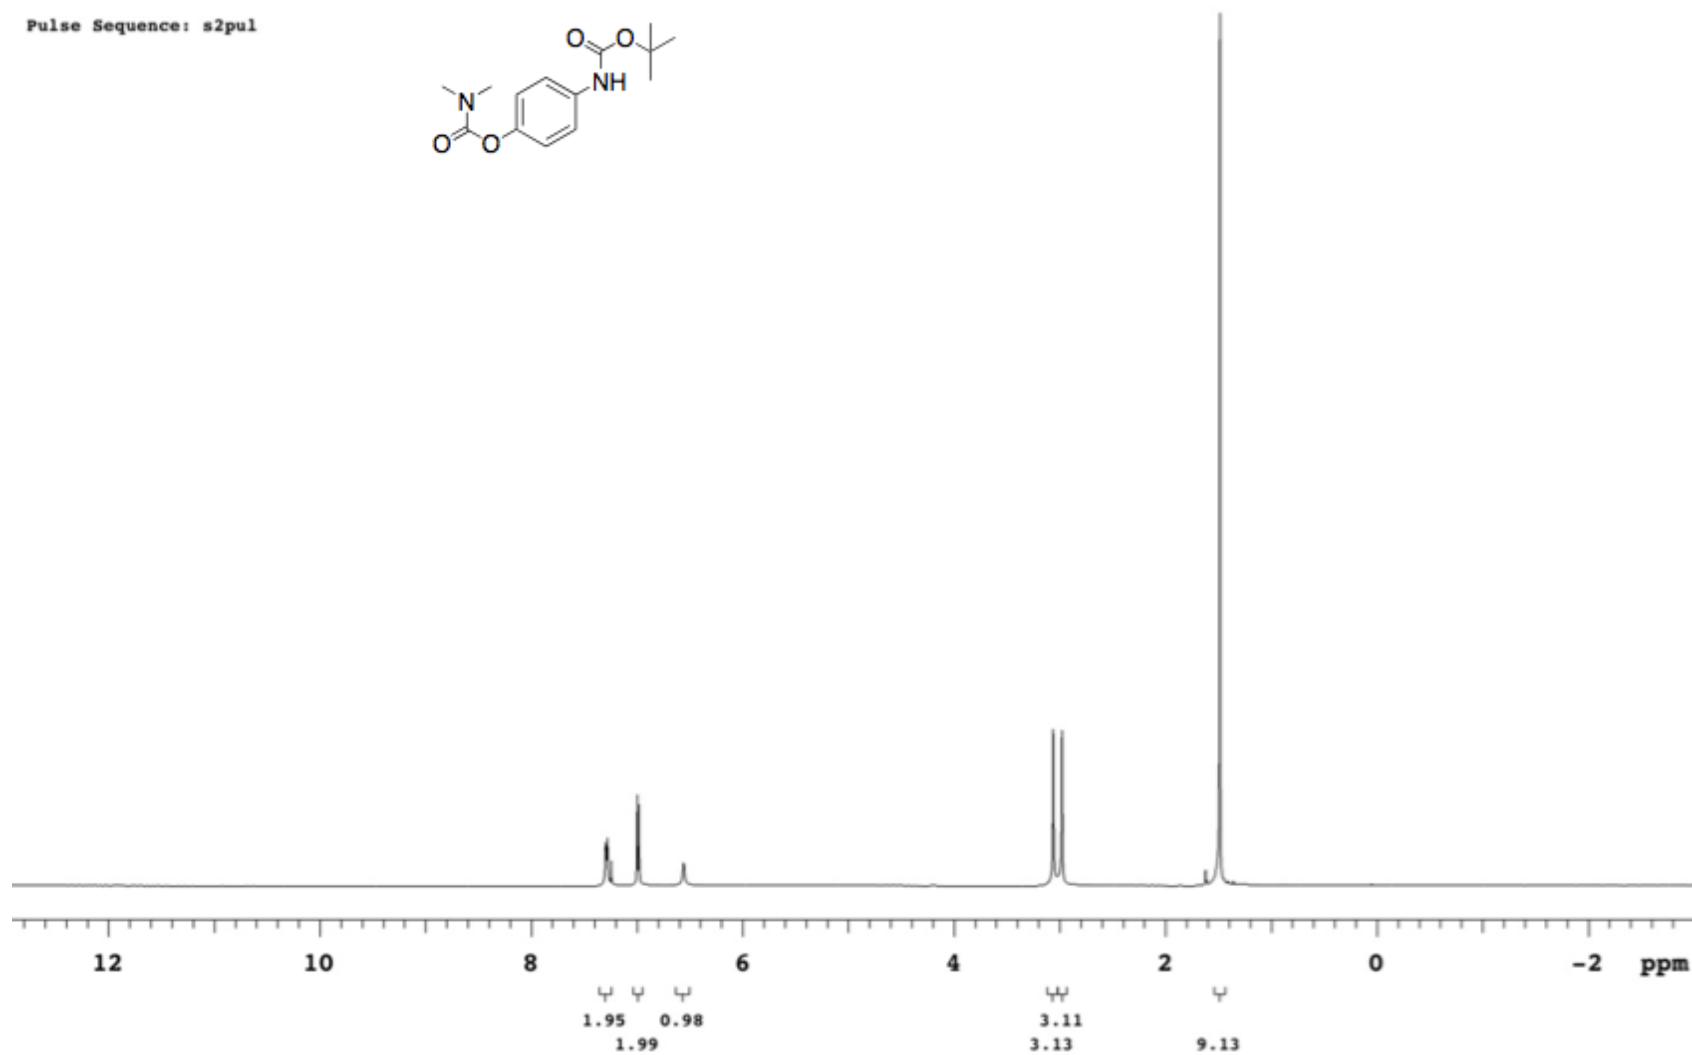

Figure. 500 MHz <sup>1</sup>H NMR spectrum

126MHz CDC13=77p 13C  
O-CONMe2-N-Boc-4-aminophenol

Pulse Sequence: s2pul

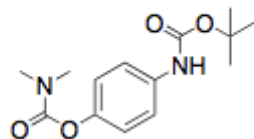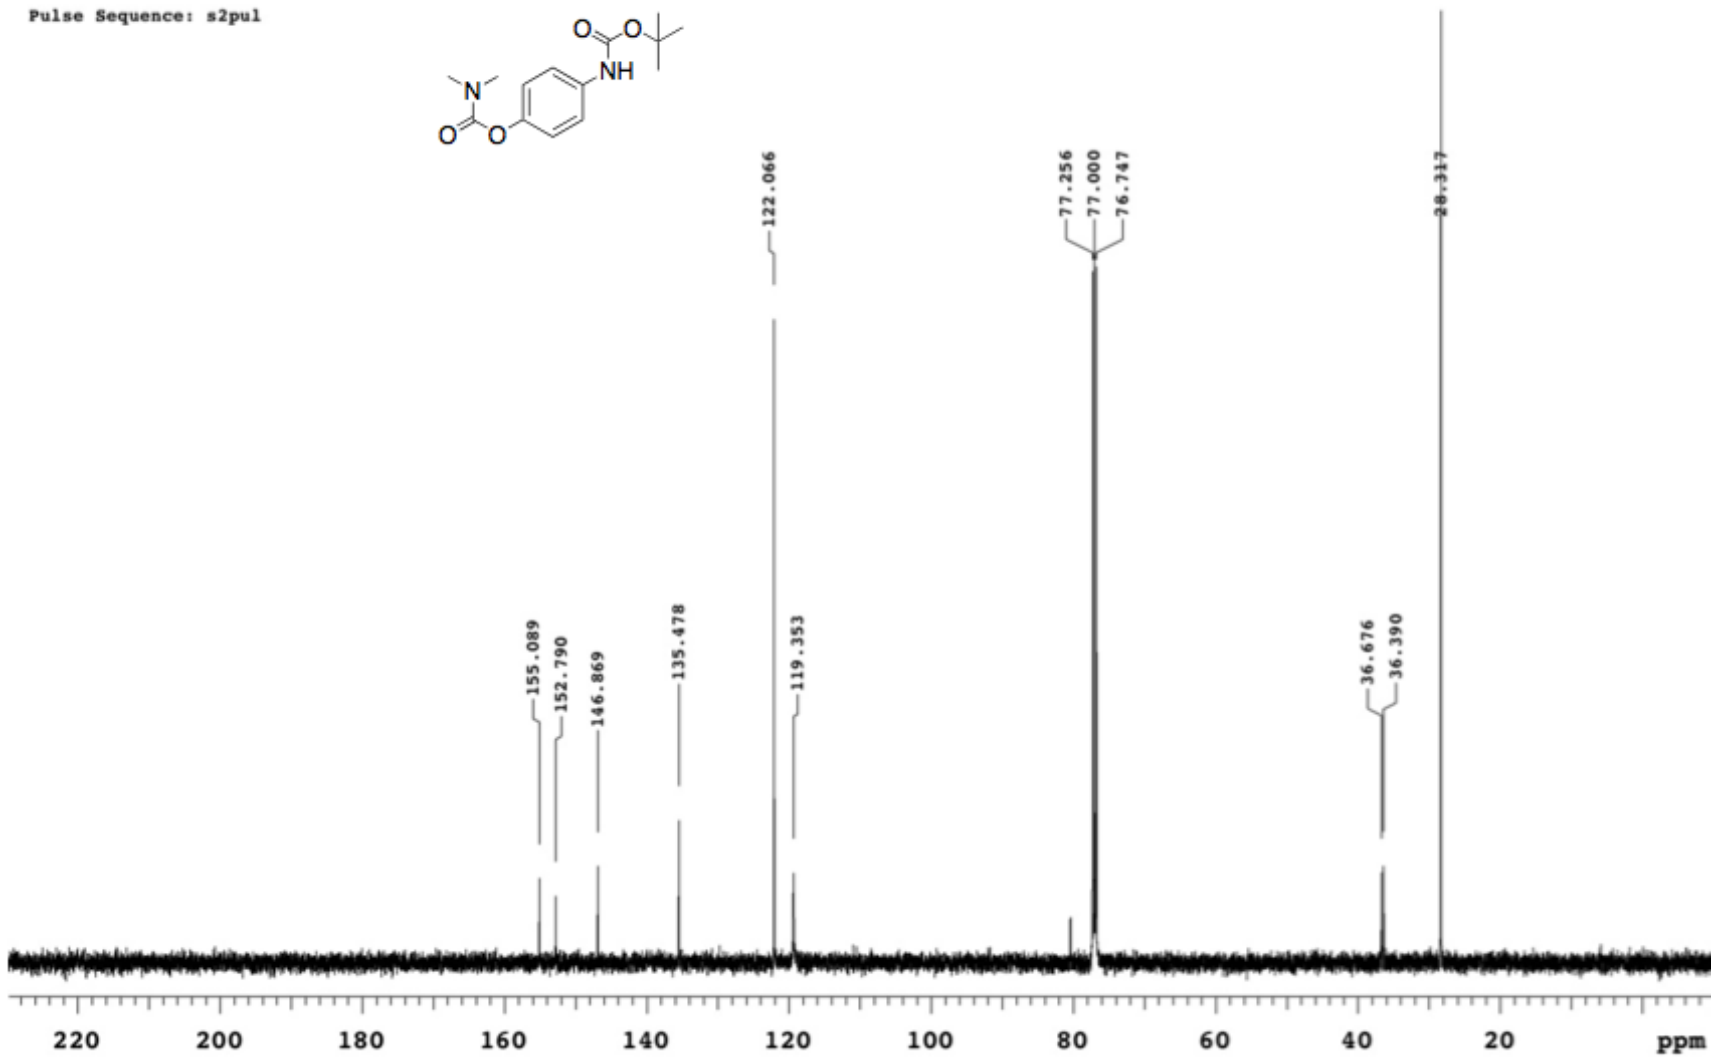

Figure. 126 MHz  $^{13}\text{C}$  NMR spectrum



500MHz CDCl<sub>3</sub>=7.24p 1H  
N-Boc-2-chloro-4-aminophenol

Pulse Sequence: s2pul

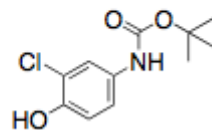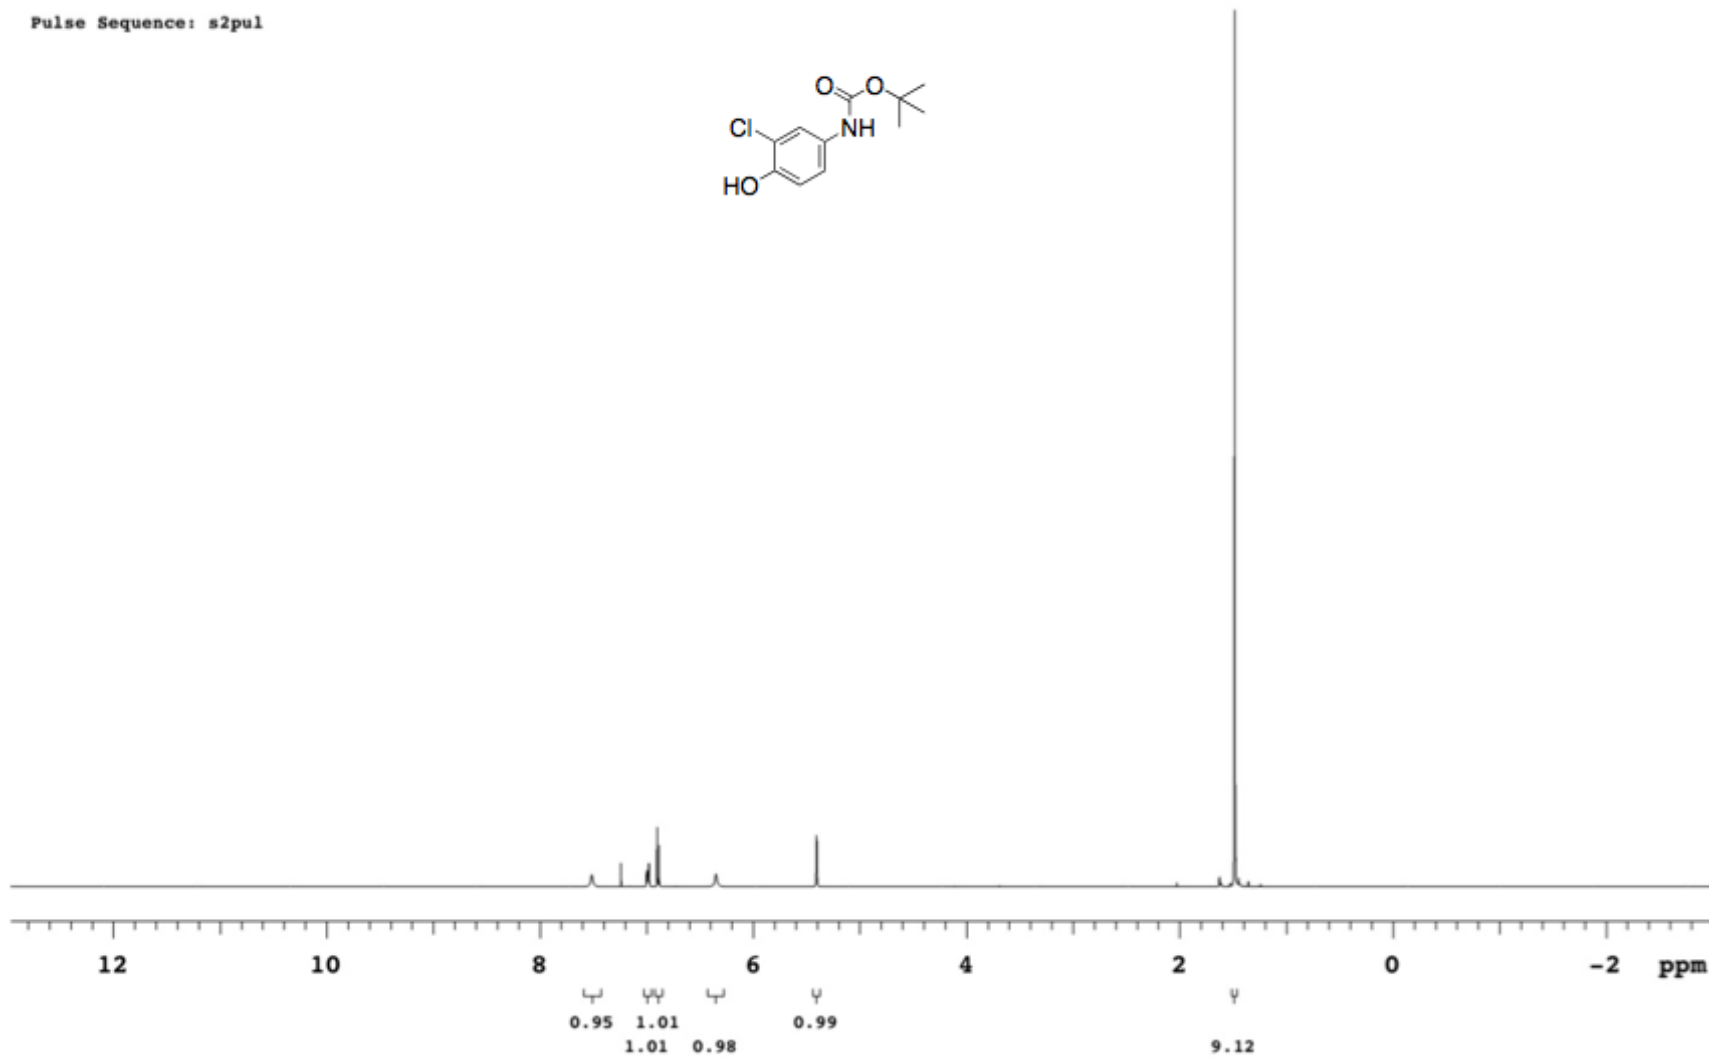

*Figure.* 500 MHz <sup>1</sup>H NMR spectrum

126MHz CDCl<sub>3</sub>=77p 13C  
N-Boc-2-chloro-4-aminophenol

Pulse Sequence: s2pul

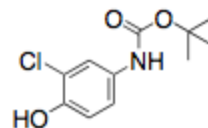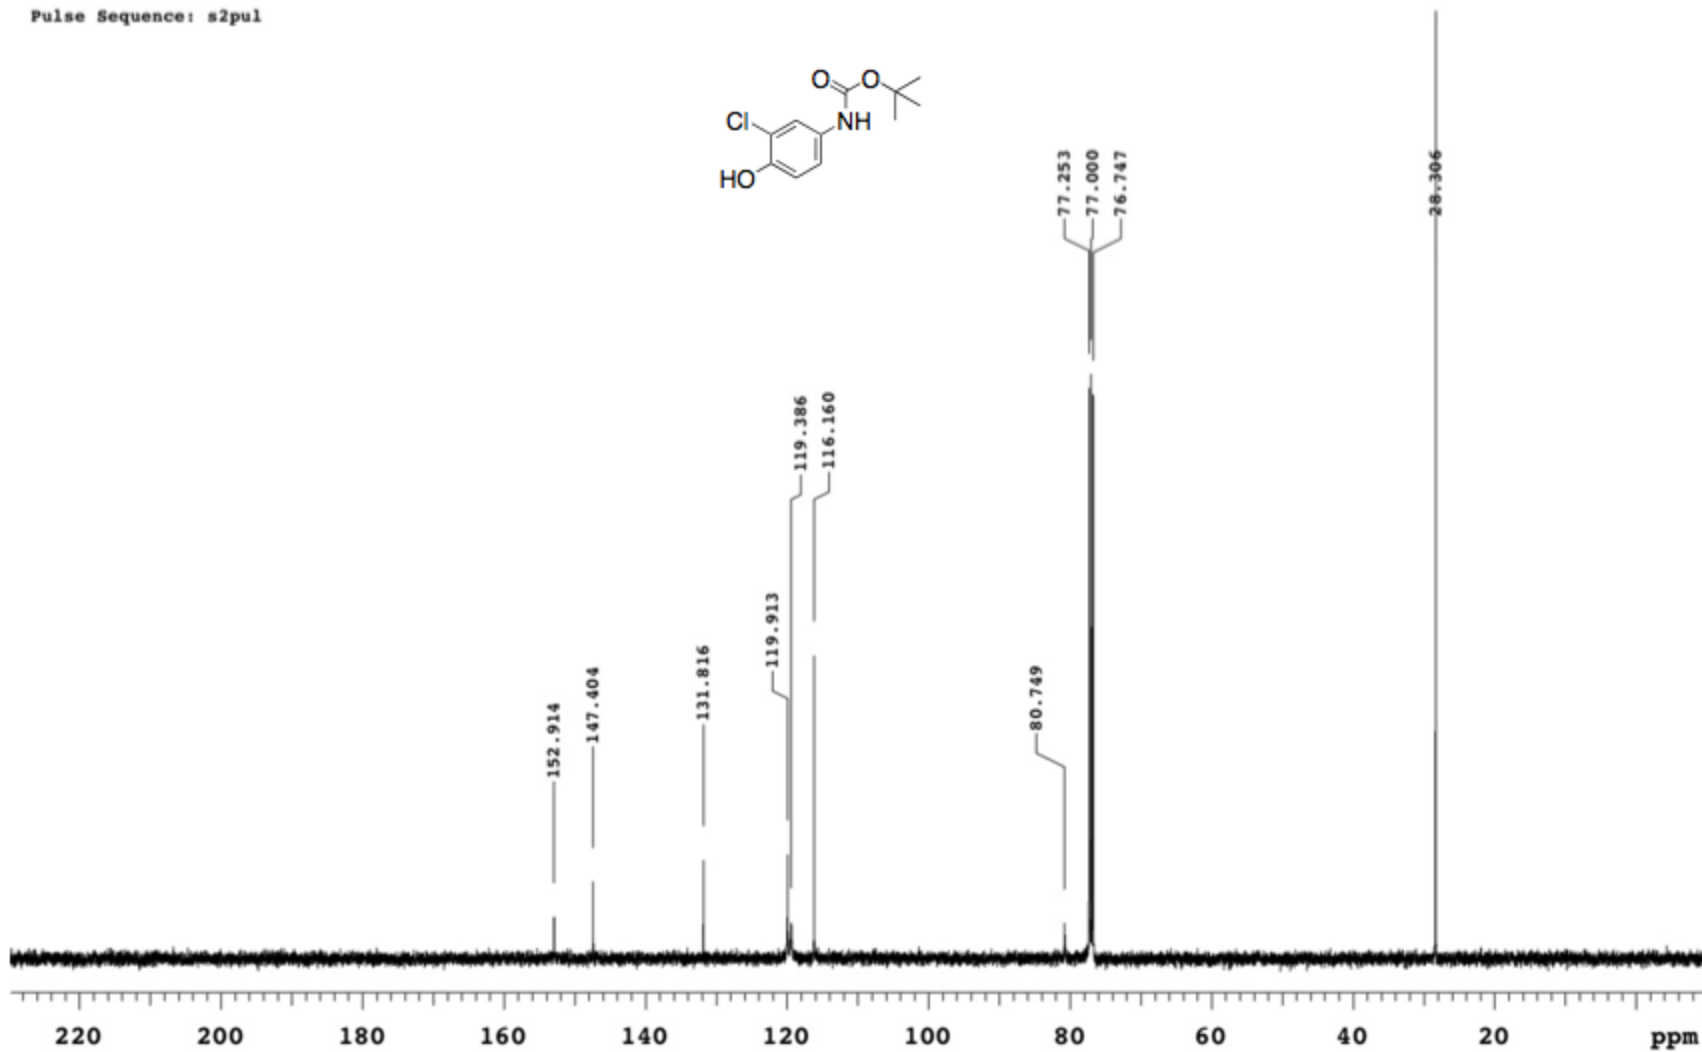

*Figure.* 126 MHz <sup>13</sup>C NMR spectrum

500MHz CDCl3=7.24p 1H  
N-Boc-4-OCONMe2-3-chloroaniline

Pulse Sequence: s2pul

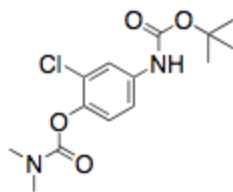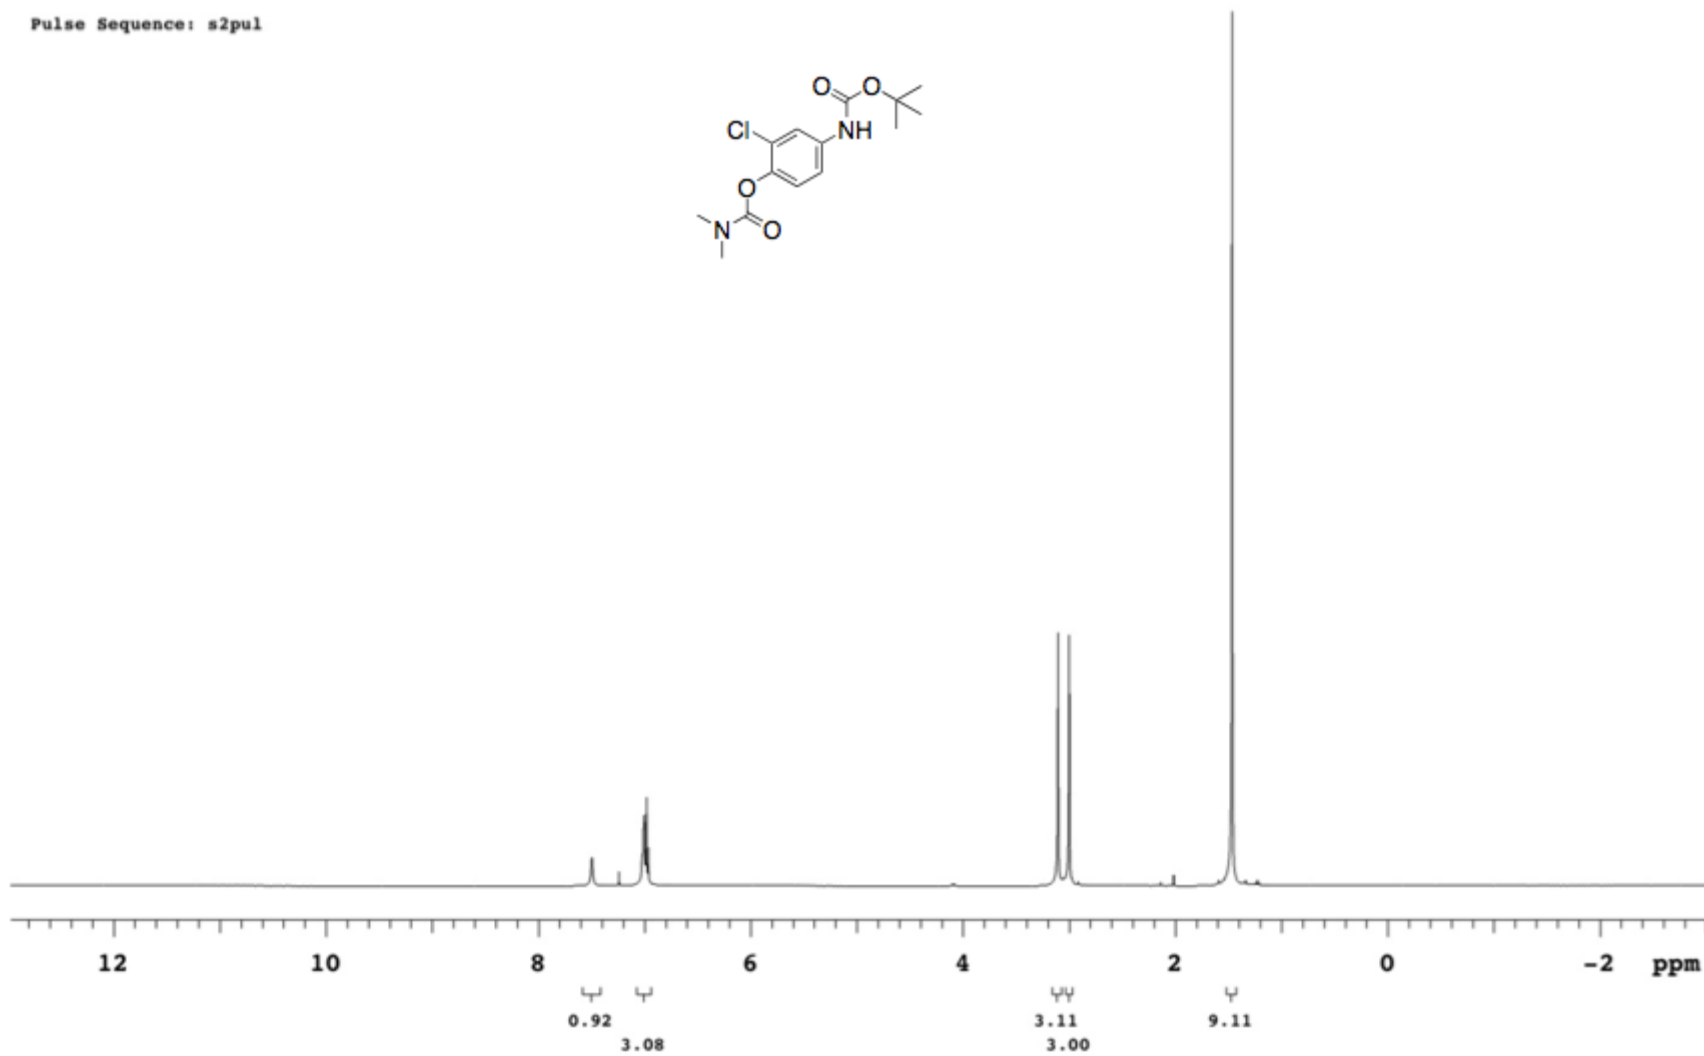

Figure. 500 MHz  $^1\text{H}$  NMR spectrum

126MHz CDCl<sub>3</sub>=77p 13C  
N-Boc-4-(OCNMe)-3-chloroaniline

Pulse Sequence: s2pul

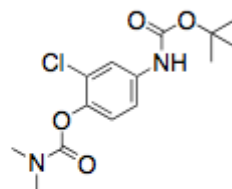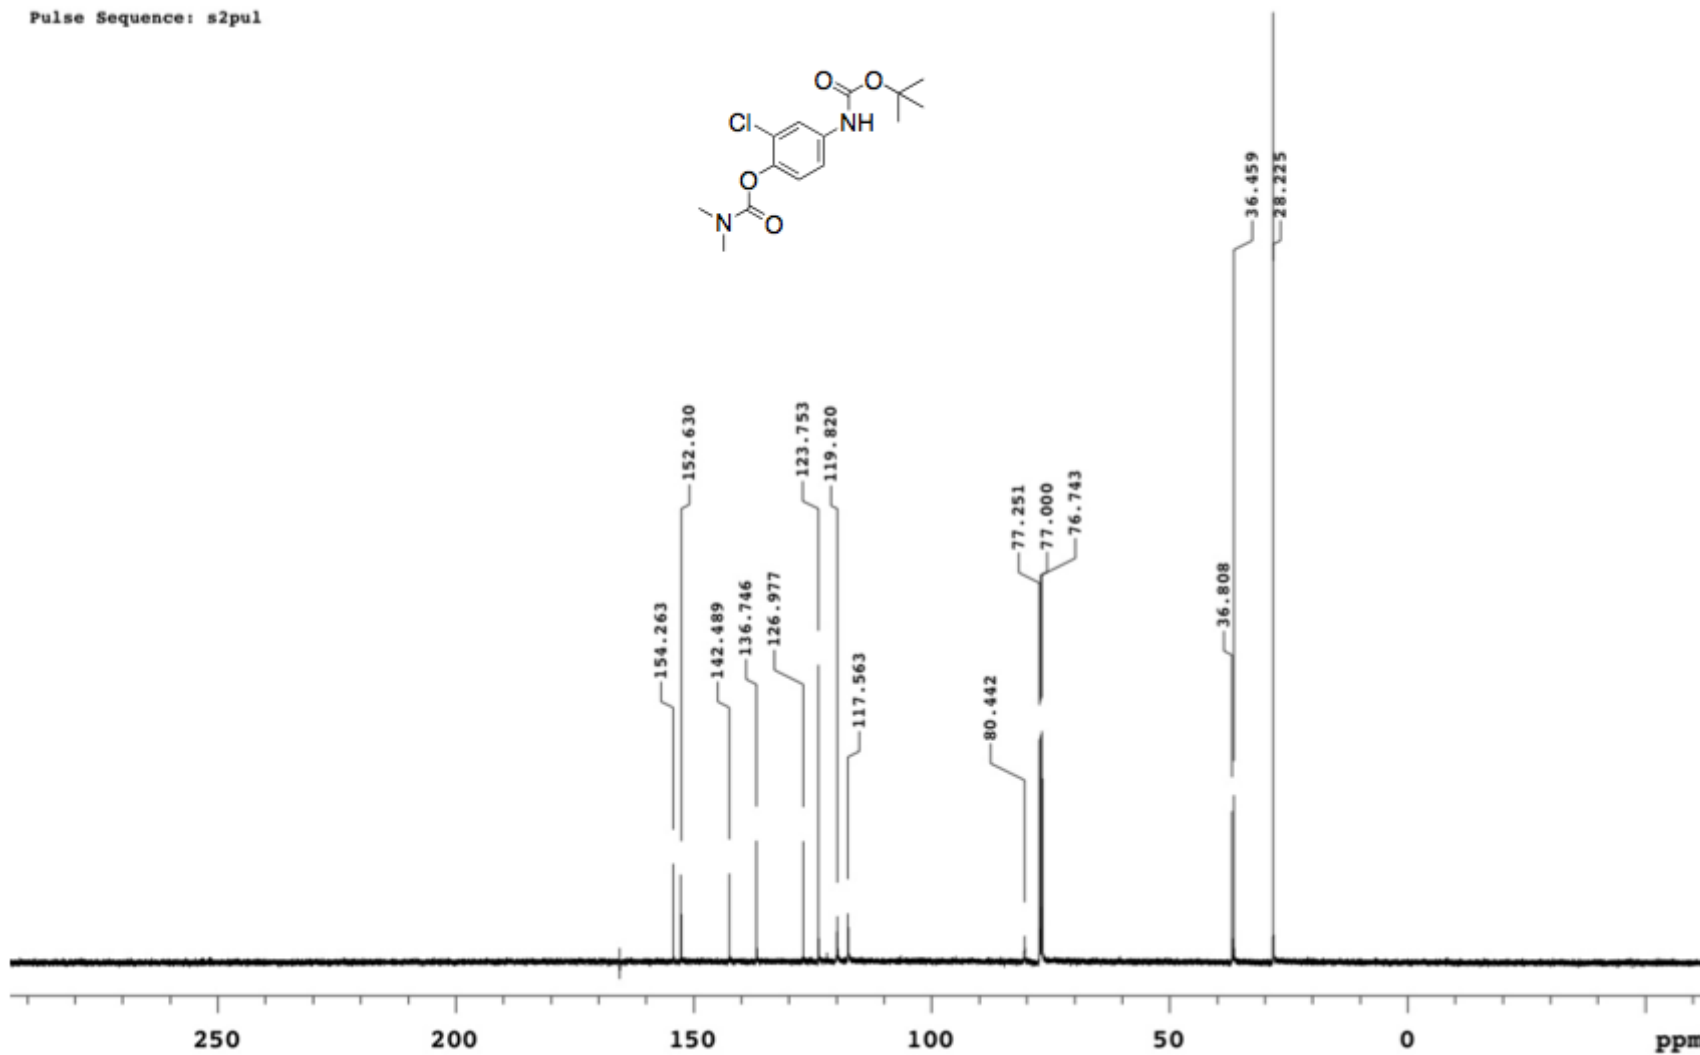

Figure. 126 MHz <sup>13</sup>C NMR spectrum

600MHz CDCl<sub>3</sub>=7.24p 1H  
N-Boc-4-aminobenzonitrile

Pulse Sequence: s2pul

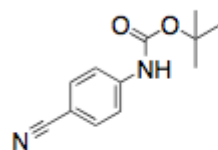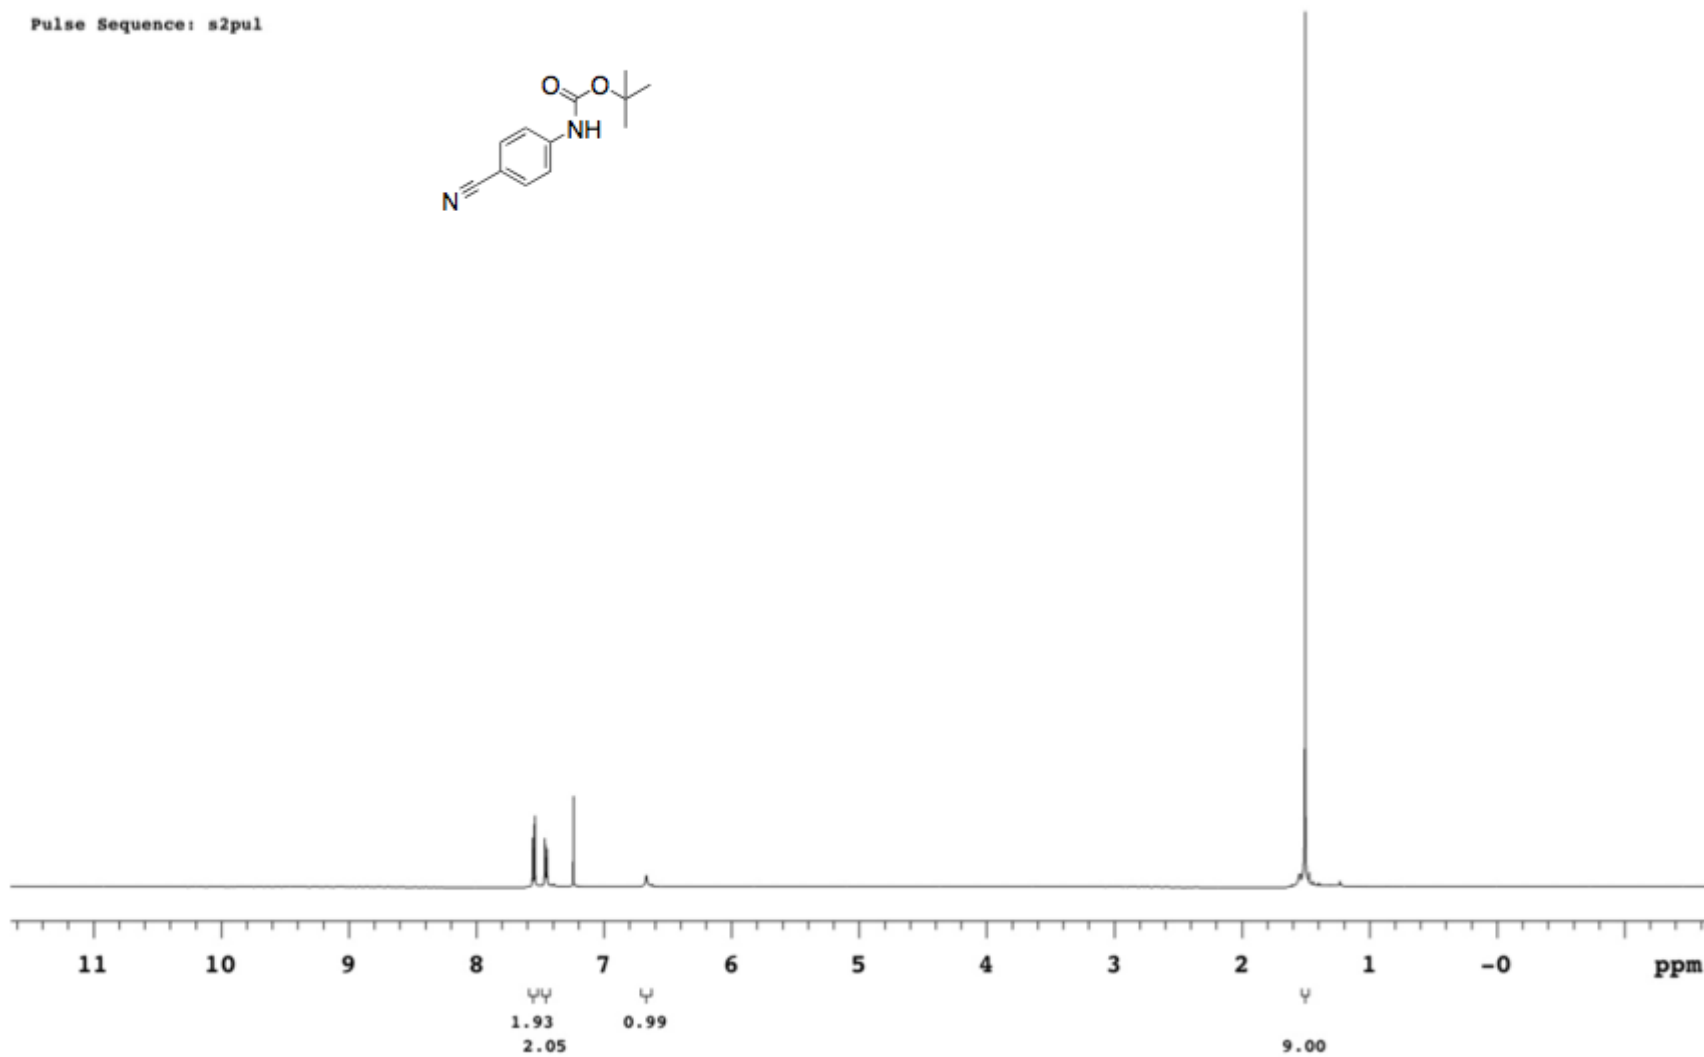

*Figure.* 600 MHz <sup>1</sup>H NMR spectrum

151MHz CDCl<sub>3</sub>=77p 13C  
N-Boc-4-aminobenzonitrile

Pulse Sequence: s2pul

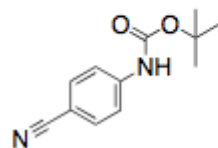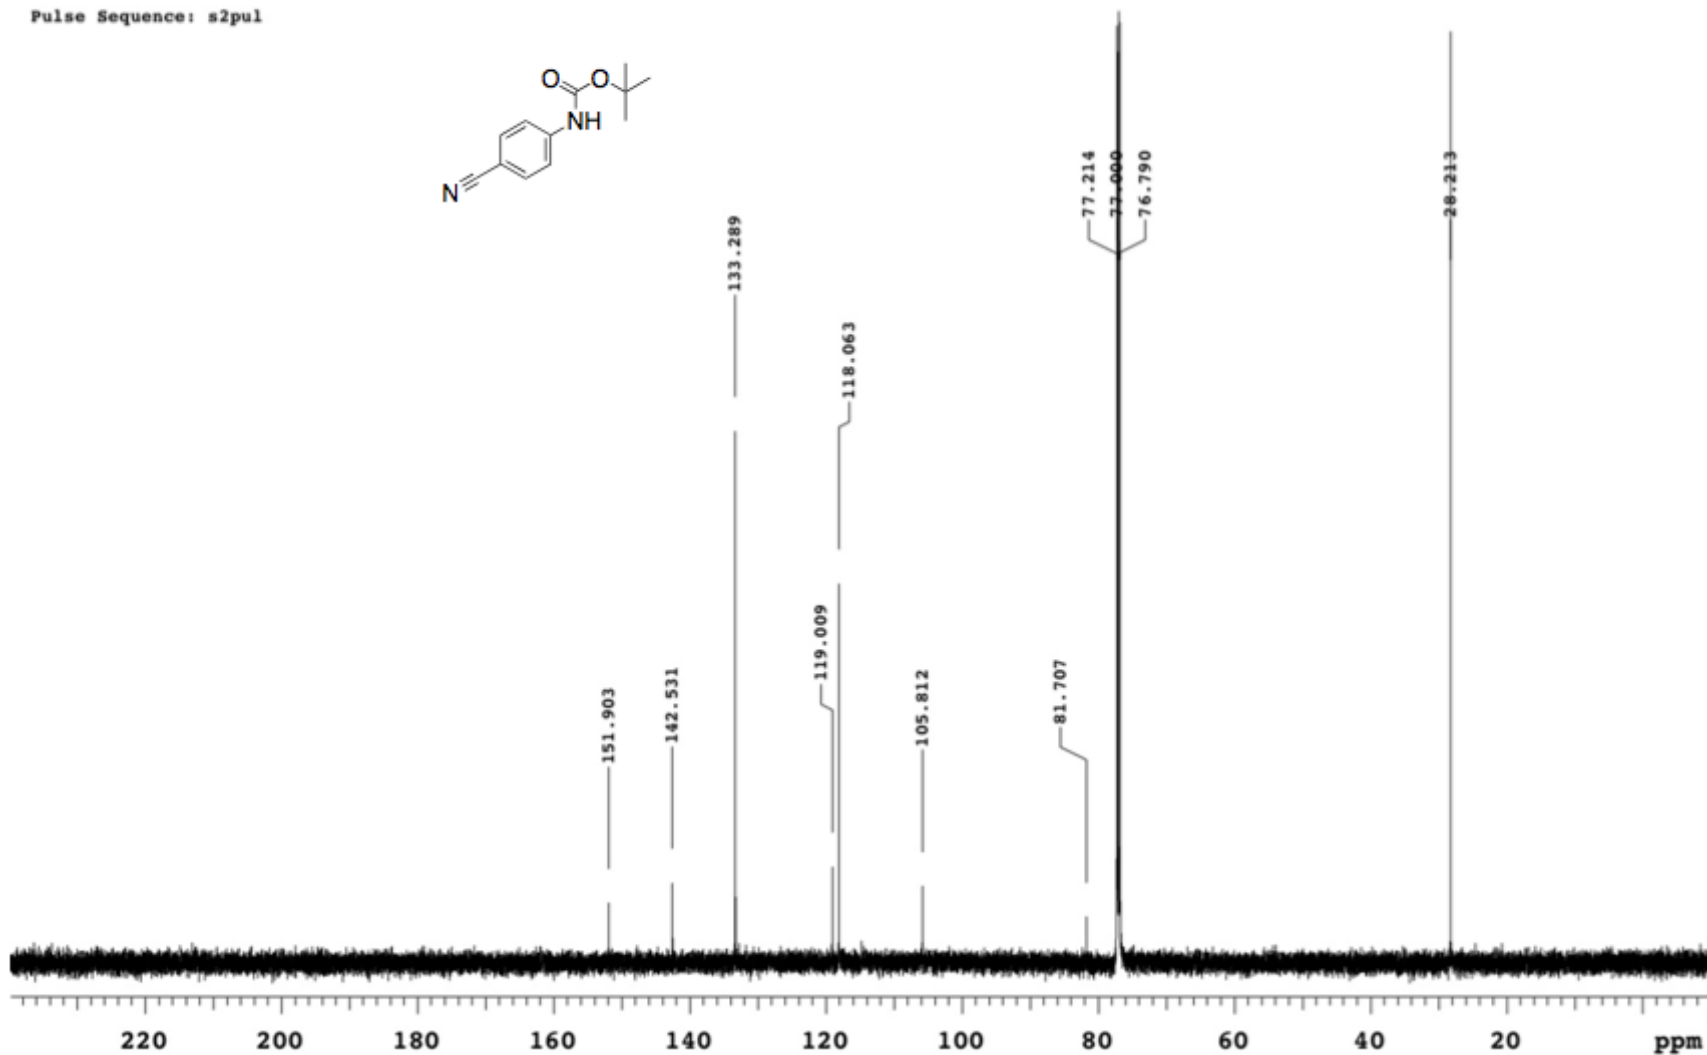

Figure. 151 MHz <sup>13</sup>C NMR spectrum

126MHz CDC13=77p 13C  
N-Boc-N-Me-3-chloroaniline

Pulse Sequence: s2pul

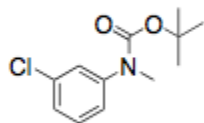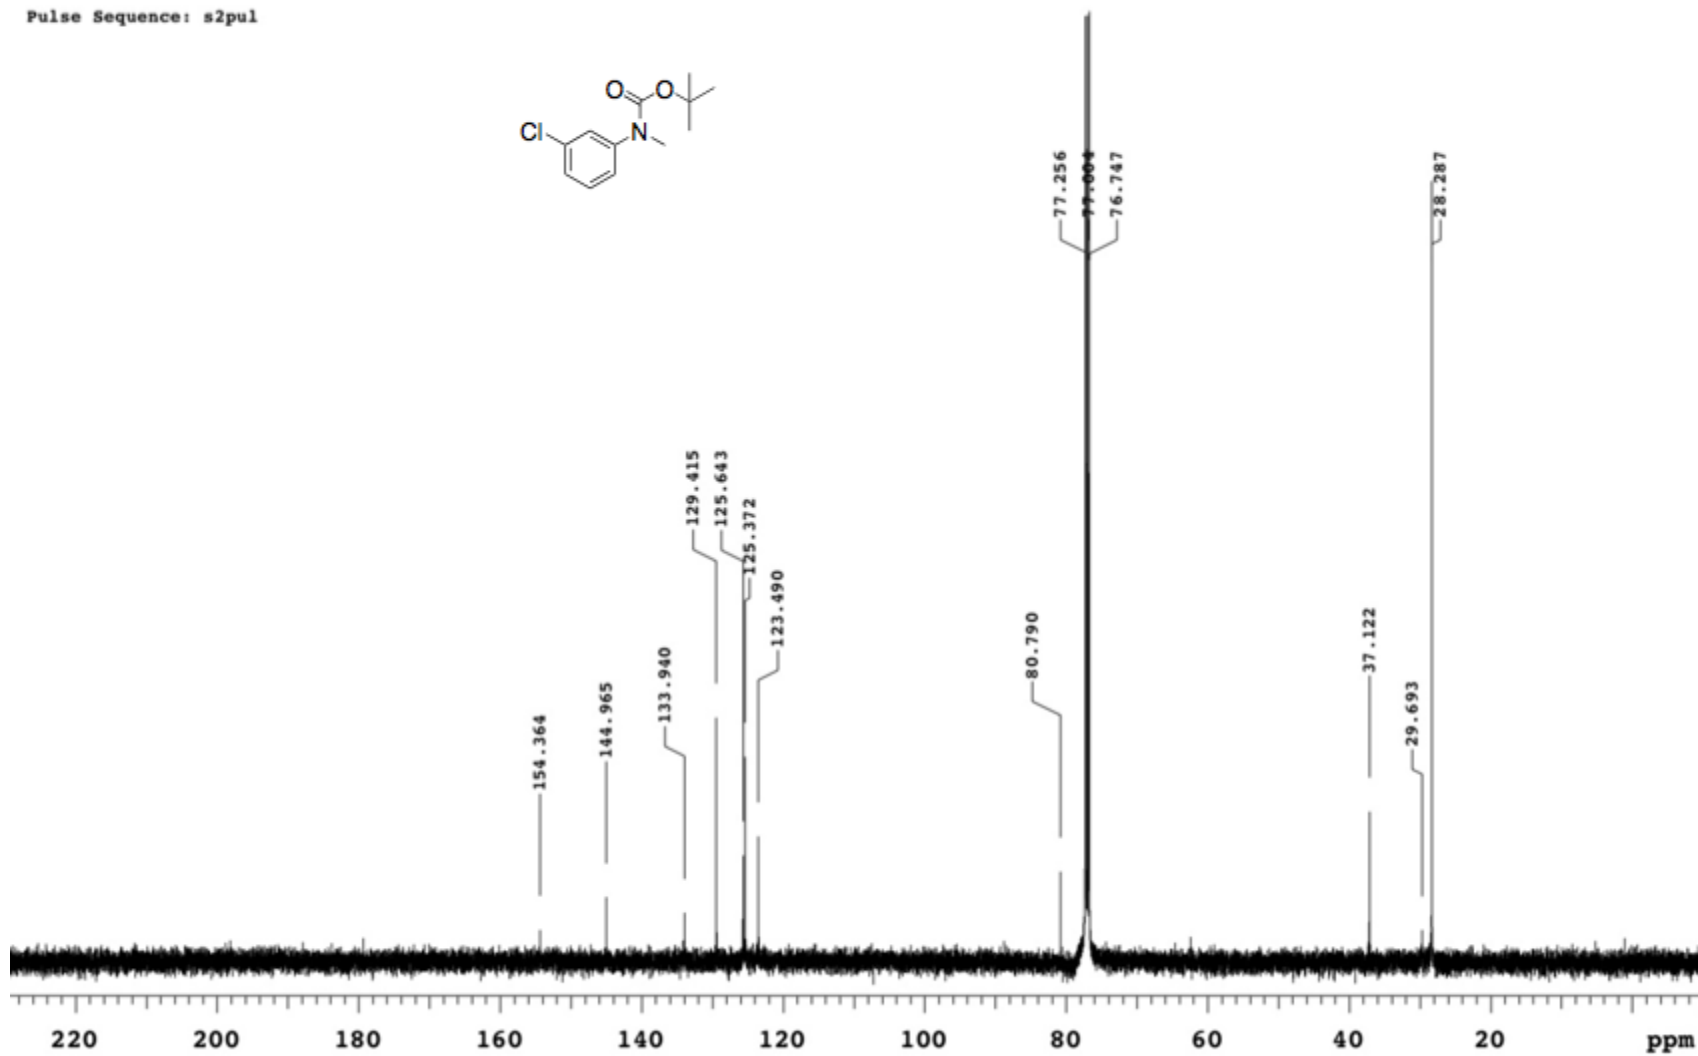

Figure. 126 MHz  $^{13}\text{C}$  NMR spectrum of 12a

500MHz CDCl<sub>3</sub>=7.24p 1H  
3-chlorophenyl t-butylcarbamate

Pulse Sequence: s2pul

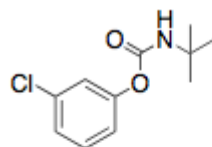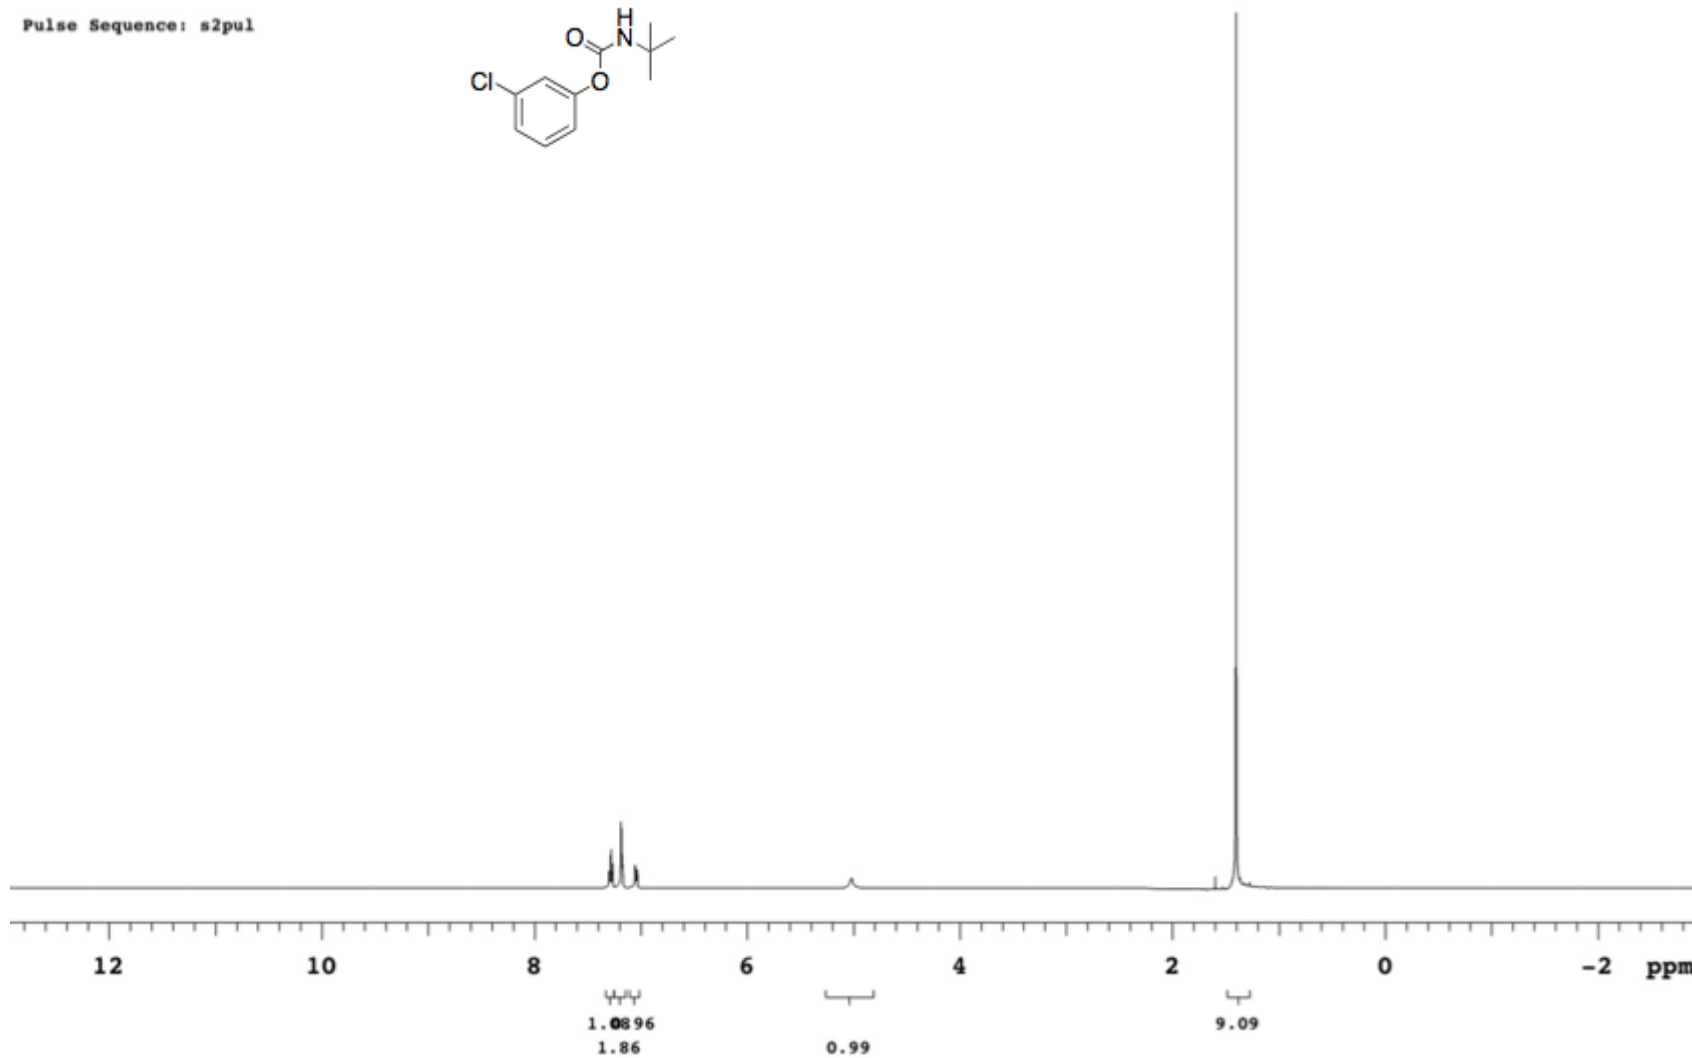

*Figure.* 500 MHz <sup>1</sup>H NMR spectrum of **12b**



126MHz CDCl<sub>3</sub>=77p 13C  
3-chlorophenyl t-butylcarbamate

Pulse Sequence: s2pul

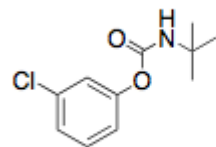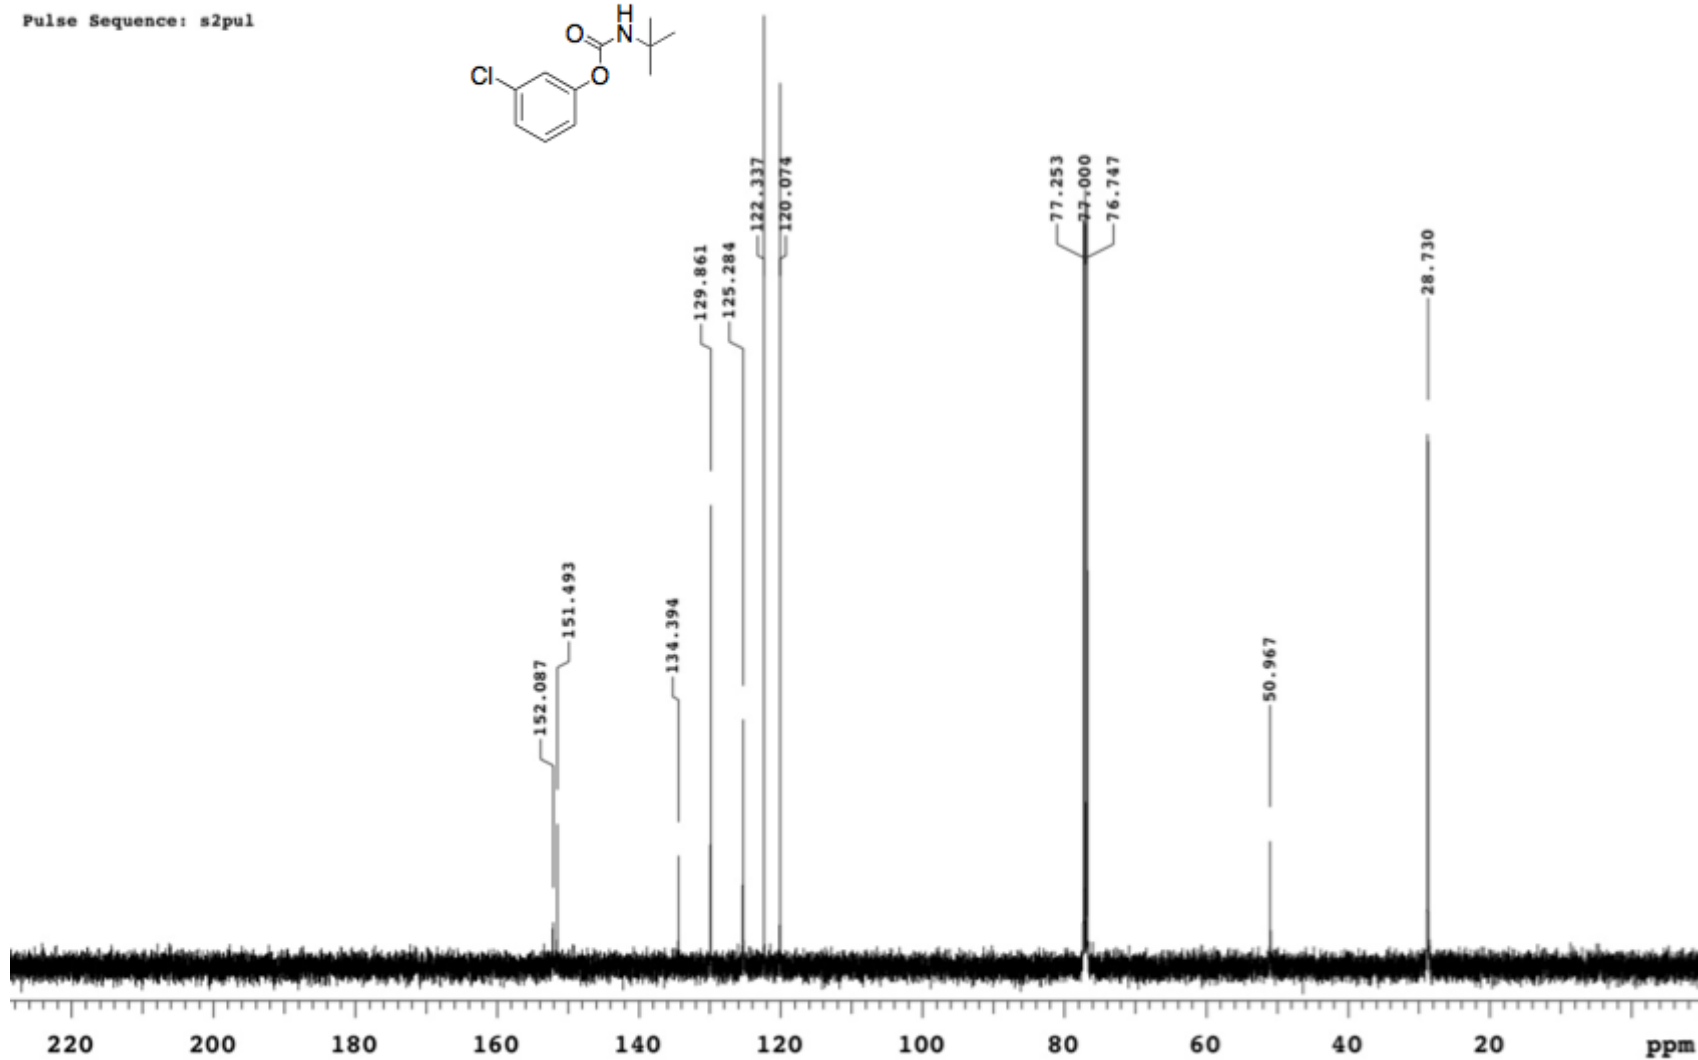

*Figure.* 126 MHz <sup>13</sup>C NMR spectrum of **12b**

500MHz CDCl3=7.24p 1H  
N-(3-chlorophenyl)-neopentylamide

Pulse Sequence: s2pul

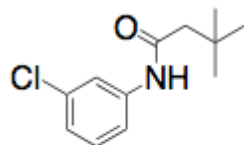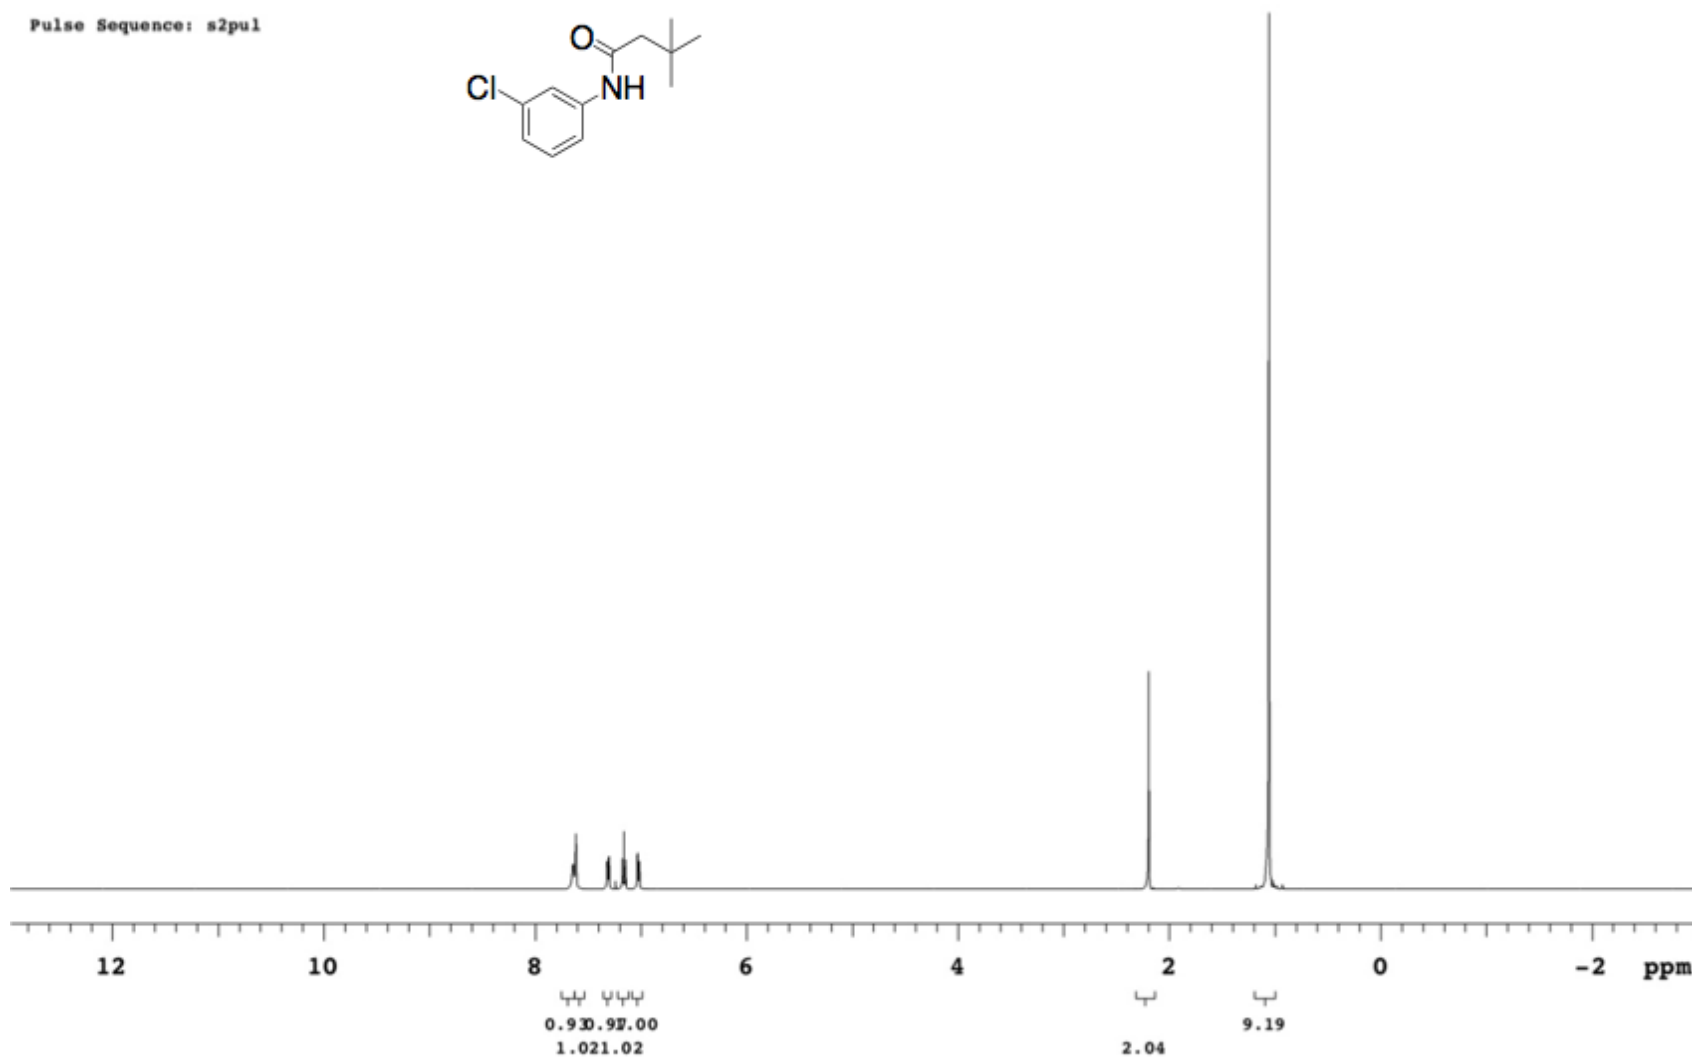

*Figure.* 500 MHz <sup>1</sup>H NMR spectrum of 12c

126MHz CDCl<sub>3</sub>=77p 13C  
N-(3-chlorophenyl)-neopentylamide

Pulse Sequence: s2pul

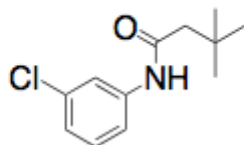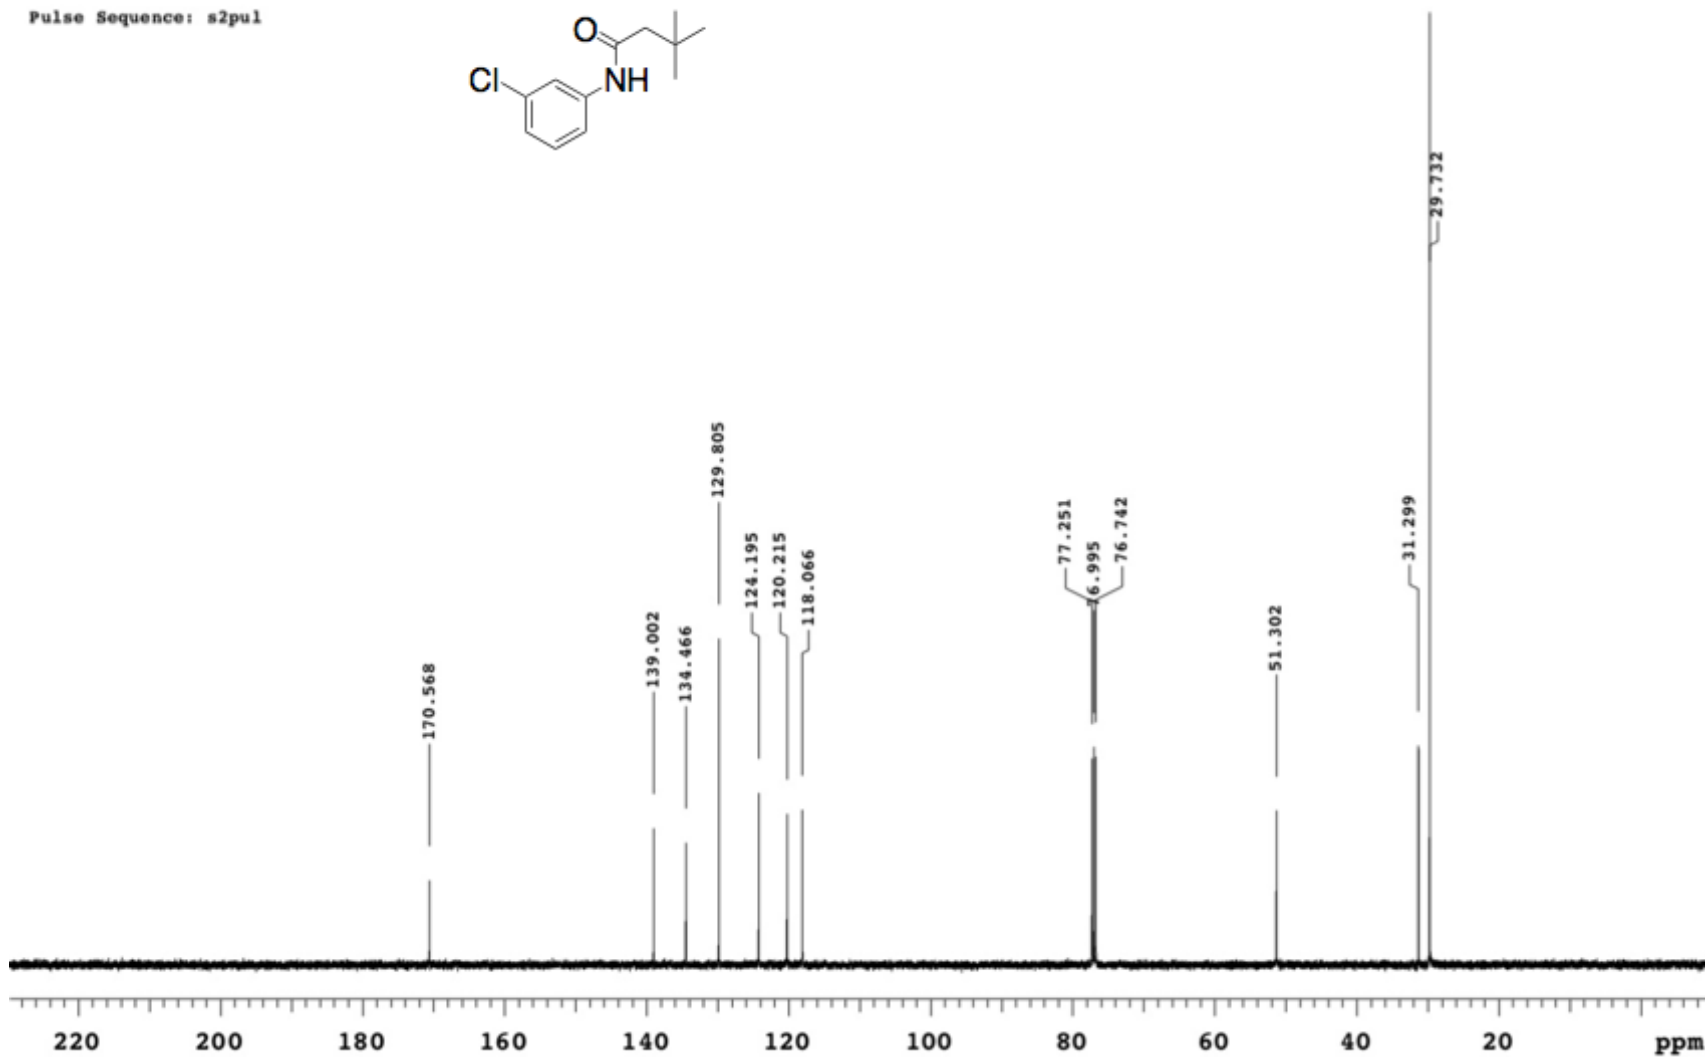

*Figure.* 126 MHz <sup>13</sup>C NMR spectrum of 12c

500MHz CDCl<sub>3</sub>=7.24p 1H  
N-Boc-N-deuterio-3-chloroaniline

Pulse Sequence: s2pul

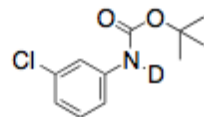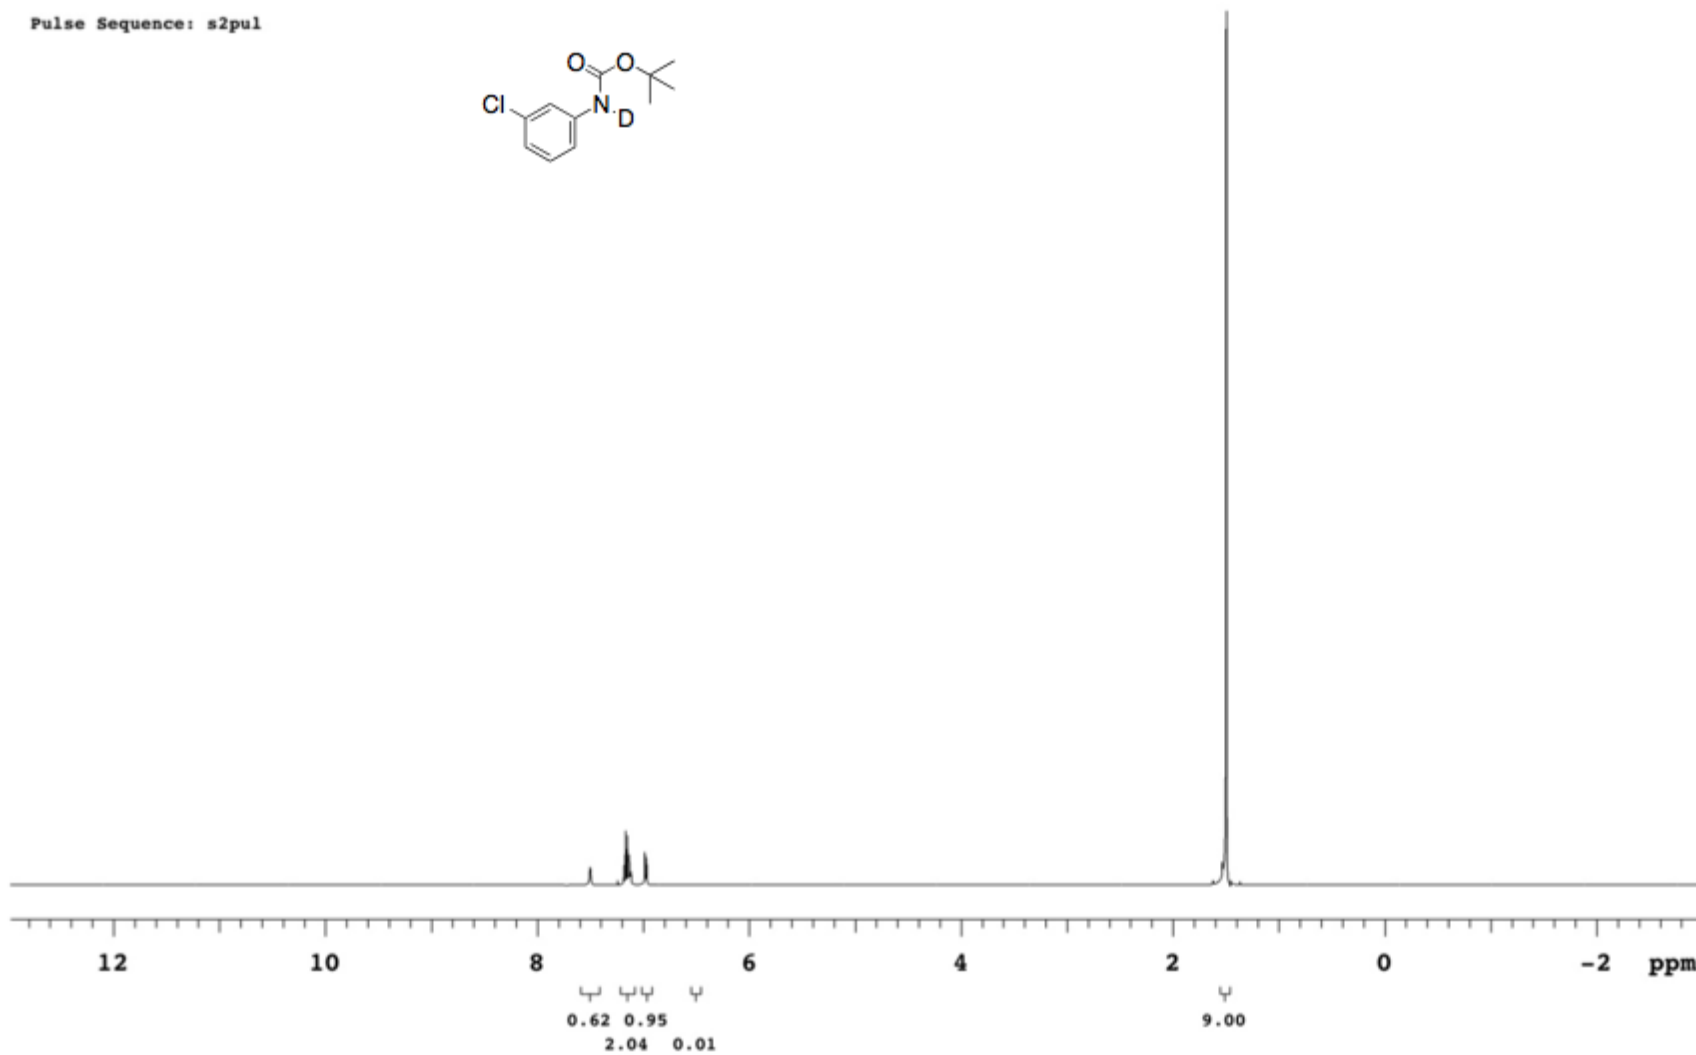

*Figure.* 500 MHz <sup>1</sup>H NMR spectrum 7-*d*<sub>1</sub>

126MHz CDCl3=77p 13C  
N-Boc-N-deuterio-3-chloroaniline

Pulse Sequence: s2pul

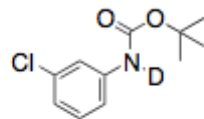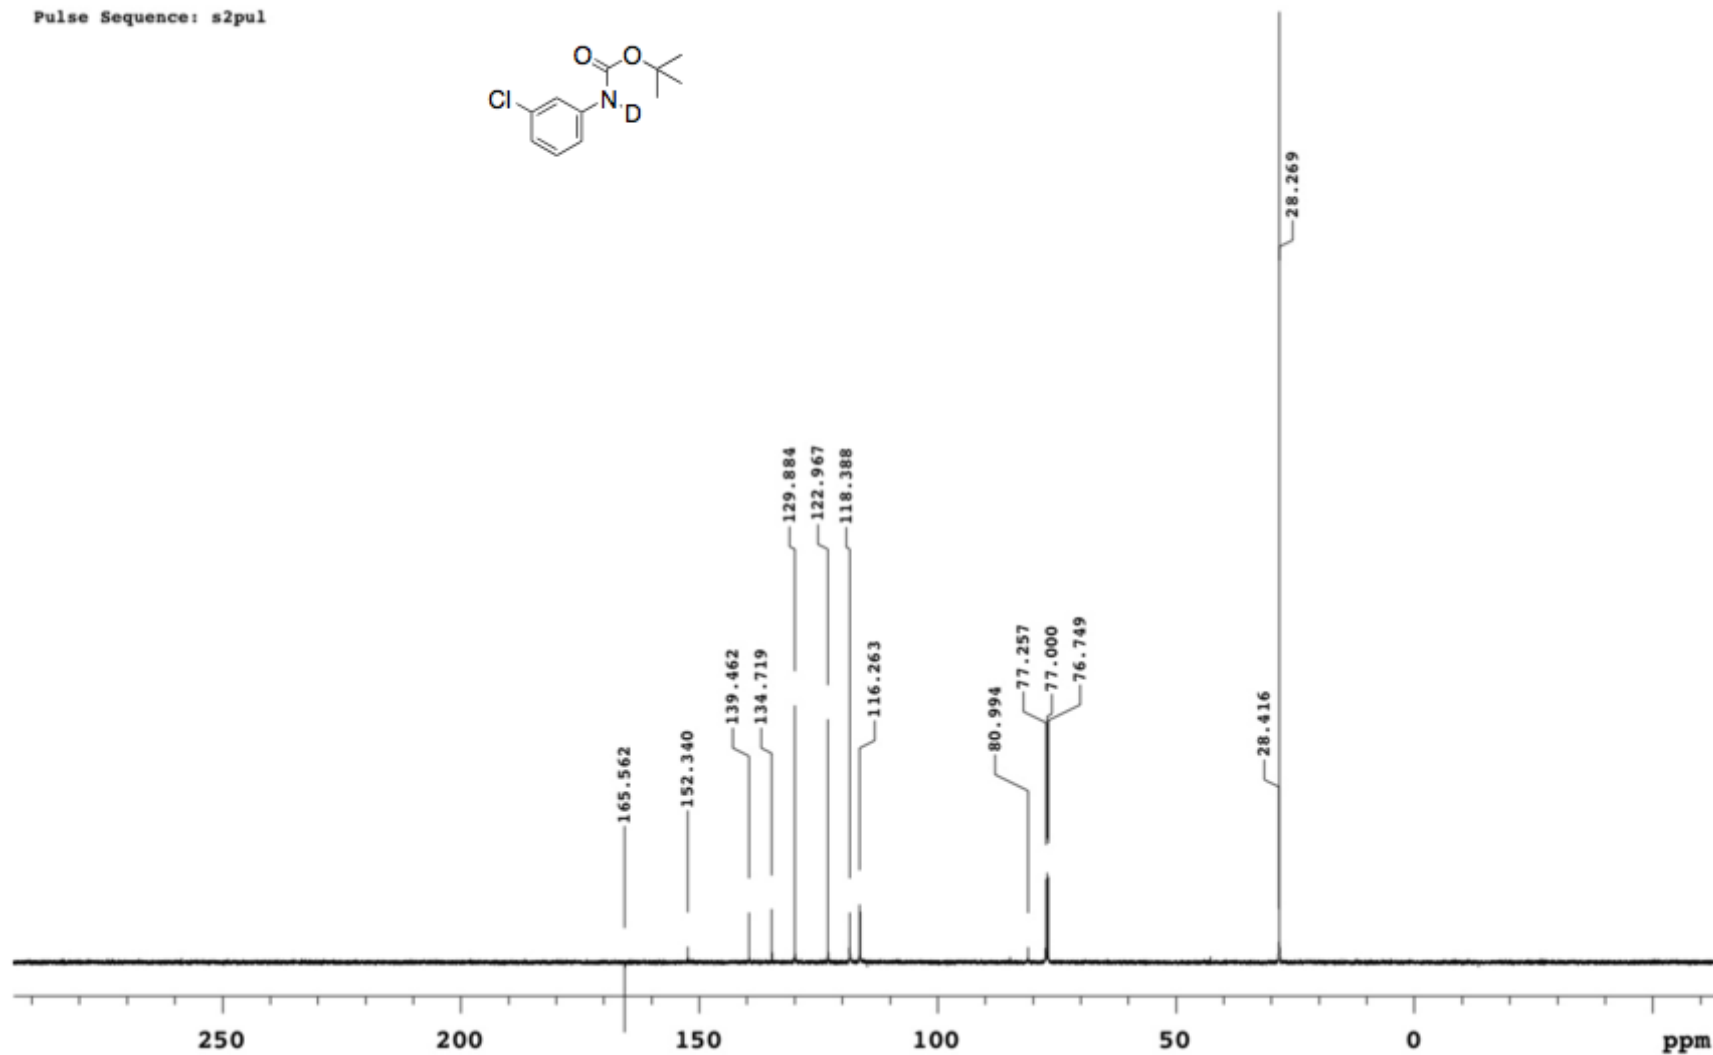

Figure. 126 MHz  $^{13}\text{C}$  NMR spectrum 7-d<sub>1</sub>

oBPin pure  
column2, first fractions  
500 MHz, CDCl3  
128 scans  
10-13-11

Sample: o-BPin\_carbamate\_pure  
File: home/peteheis5/oBPin\_pure\_col2\_firstfracts\_10-13-11.fid

Pulse Sequence: s2pul

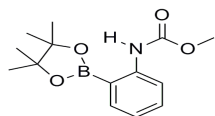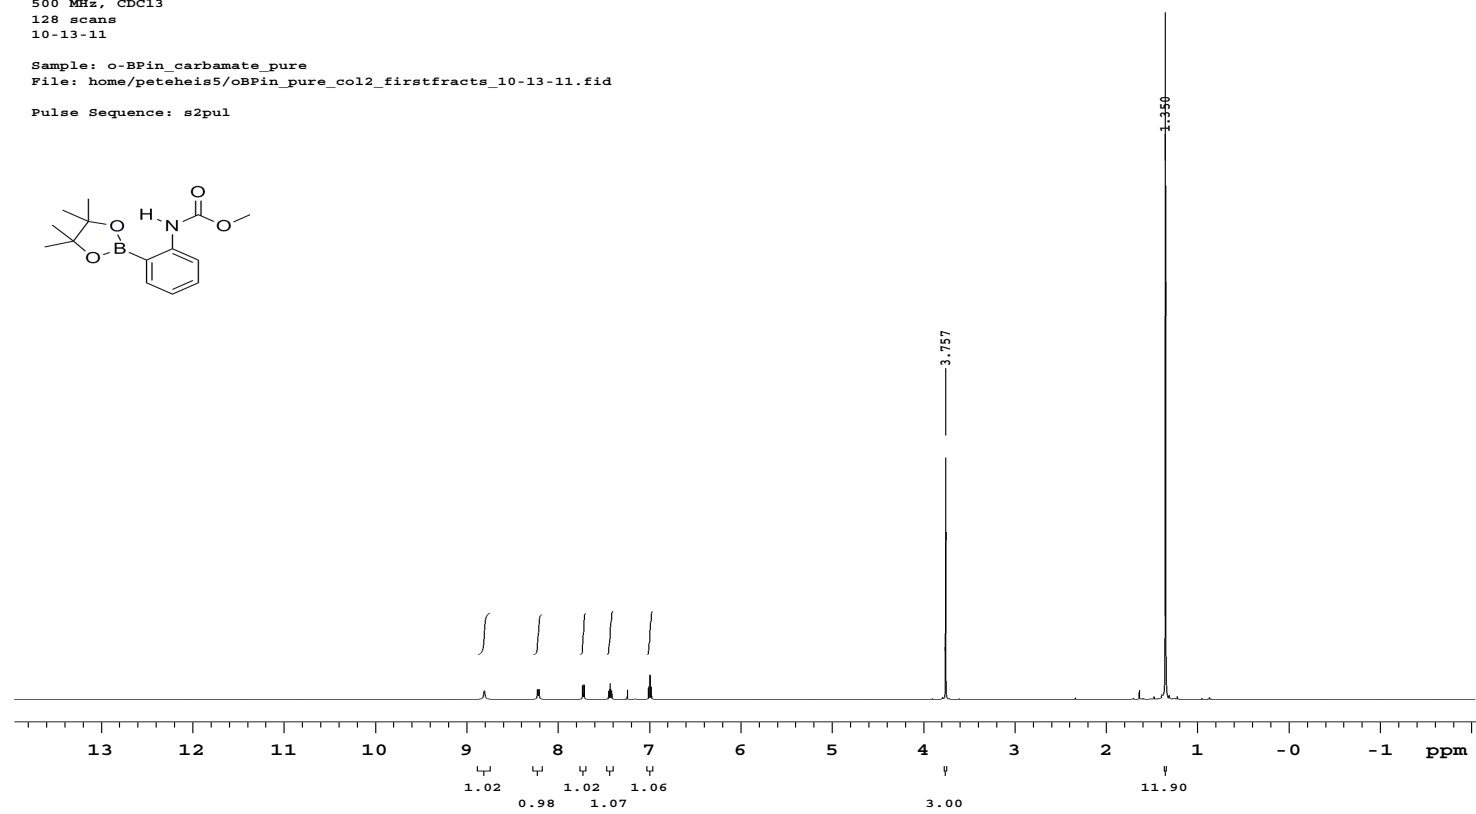

*Figure.* 500 MHz  $^1\text{H}$  NMR spectrum

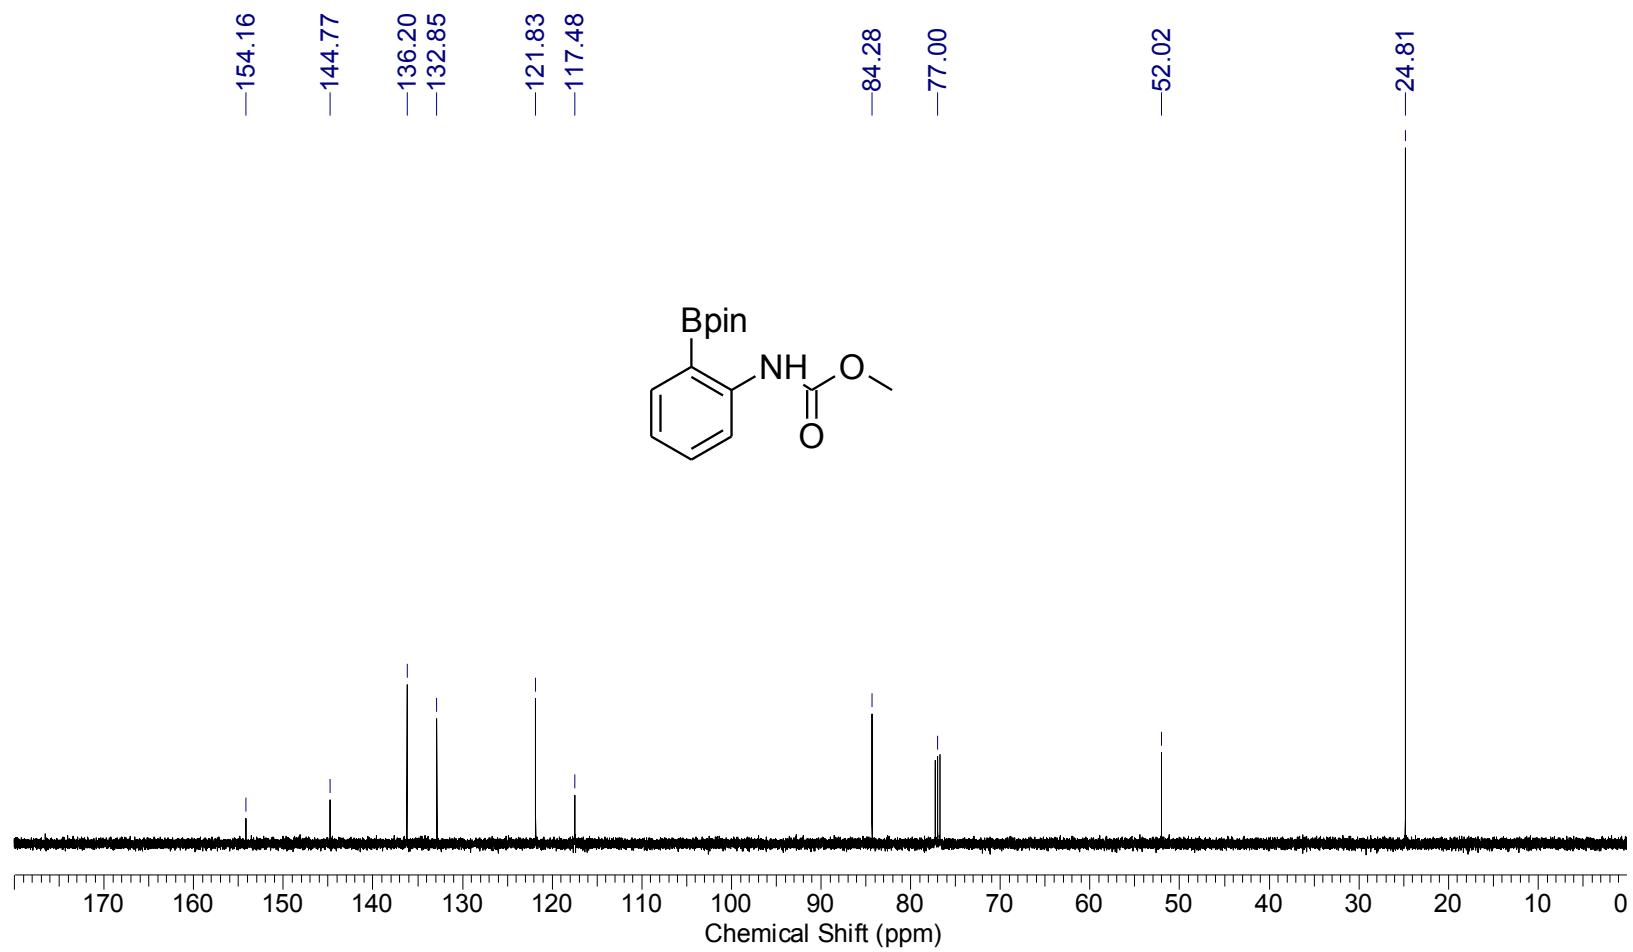

*Figure.* 126 MHz  $^{13}\text{C}$  NMR spectrum

m-BPin pure  
col, 2x recr, hex wash  
500 MHz, CDCl3  
9-9-11

File: home/peteheis5a/mBPin\_pure\_hexwash\_HNMR\_9-9-11.fid

Pulse Sequence: s2pul

| INDEX | FREQUENCY | PPM   | HEIGHT |
|-------|-----------|-------|--------|
| 1     | 1872.7    | 3.747 | 33.5   |
| 2     | 656.3     | 1.313 | 153.9  |

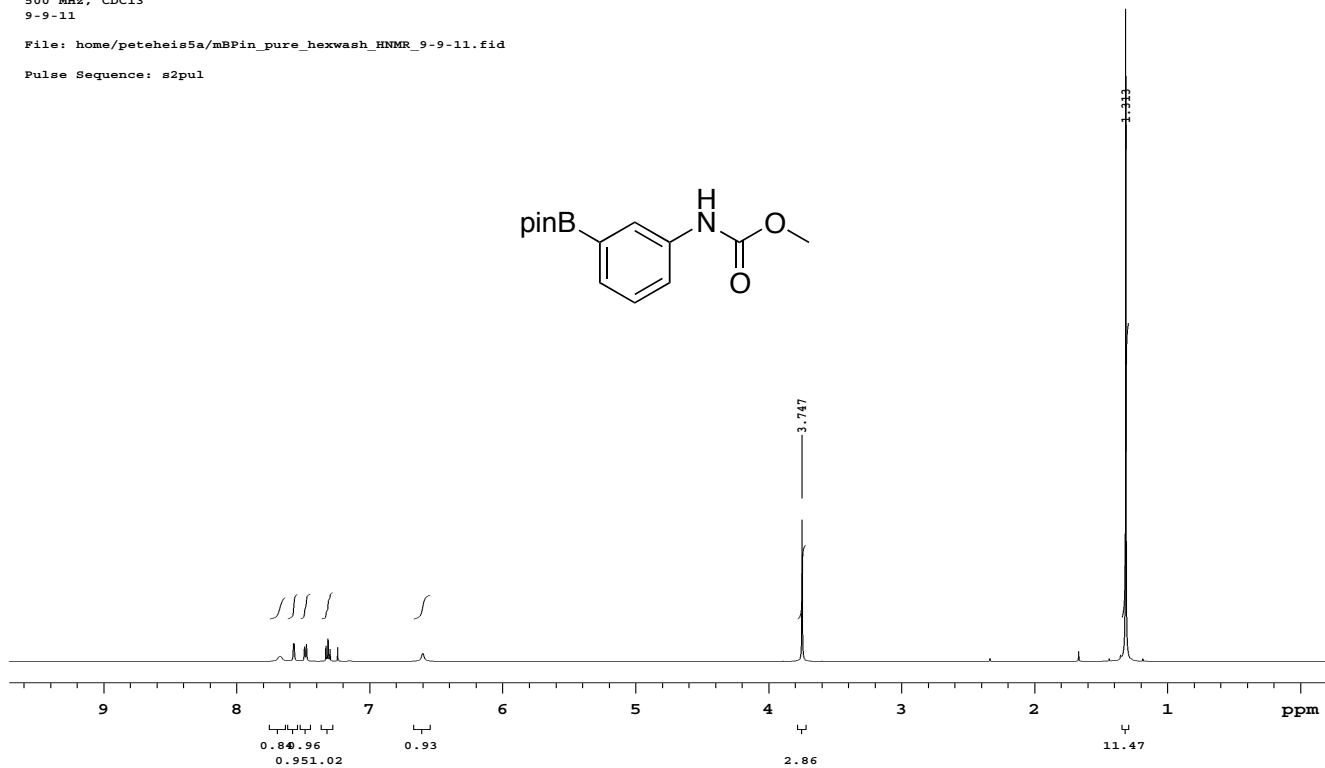

*Figure.* 500 MHz  $^1\text{H}$  NMR spectrum



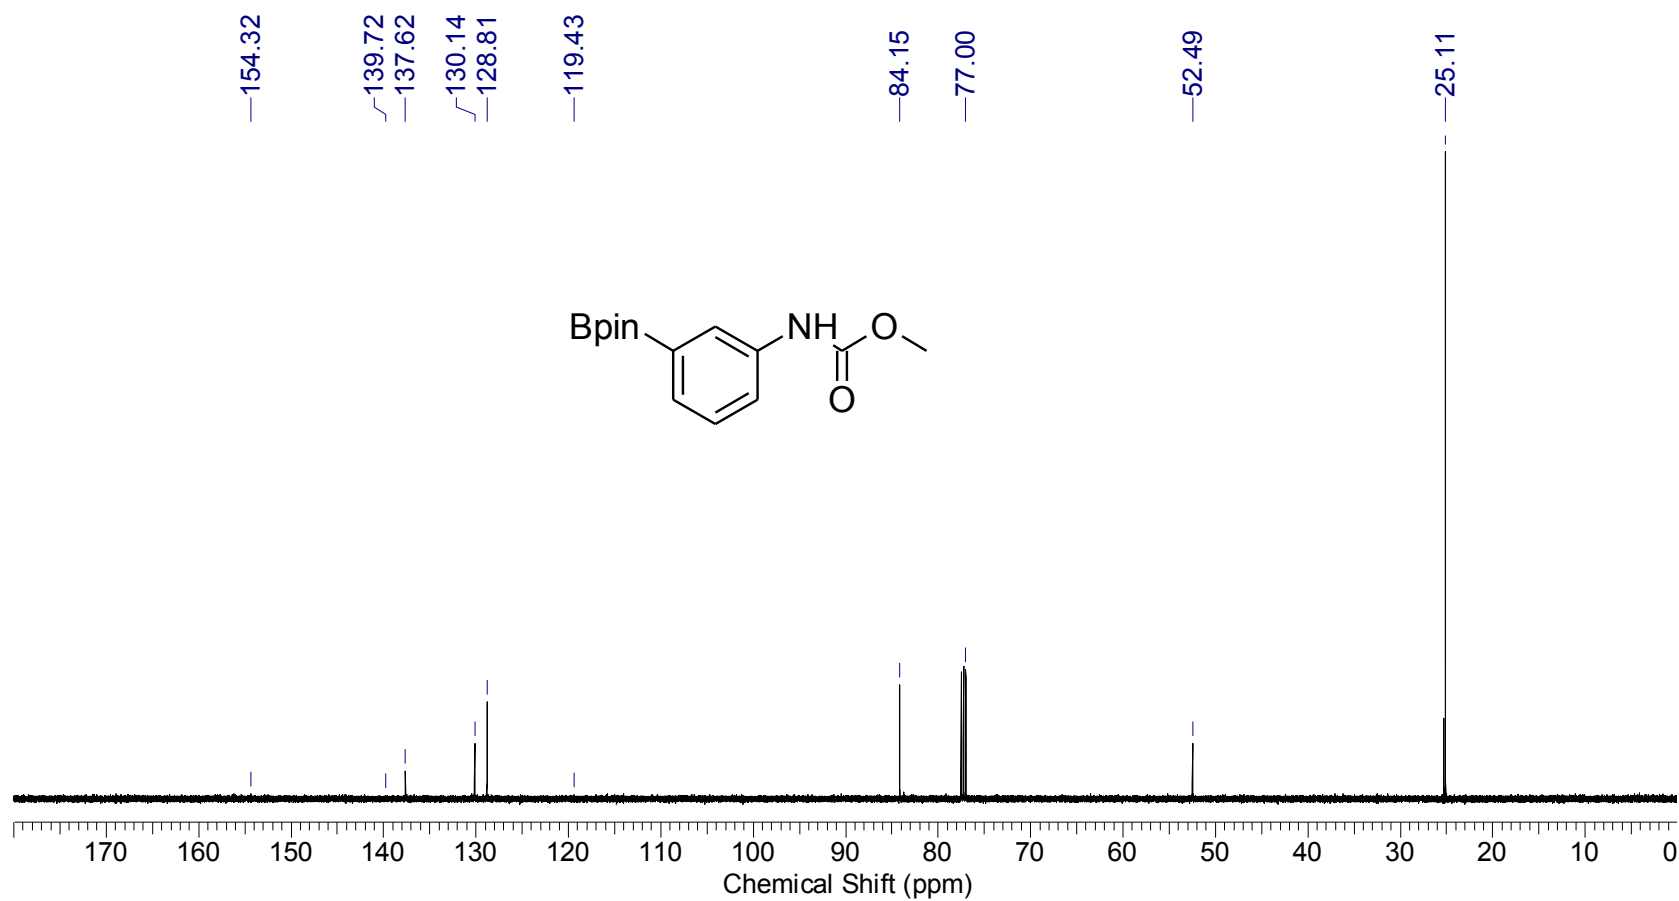

*Figure.* 126 MHz  $^{13}\text{C}$  NMR spectrum

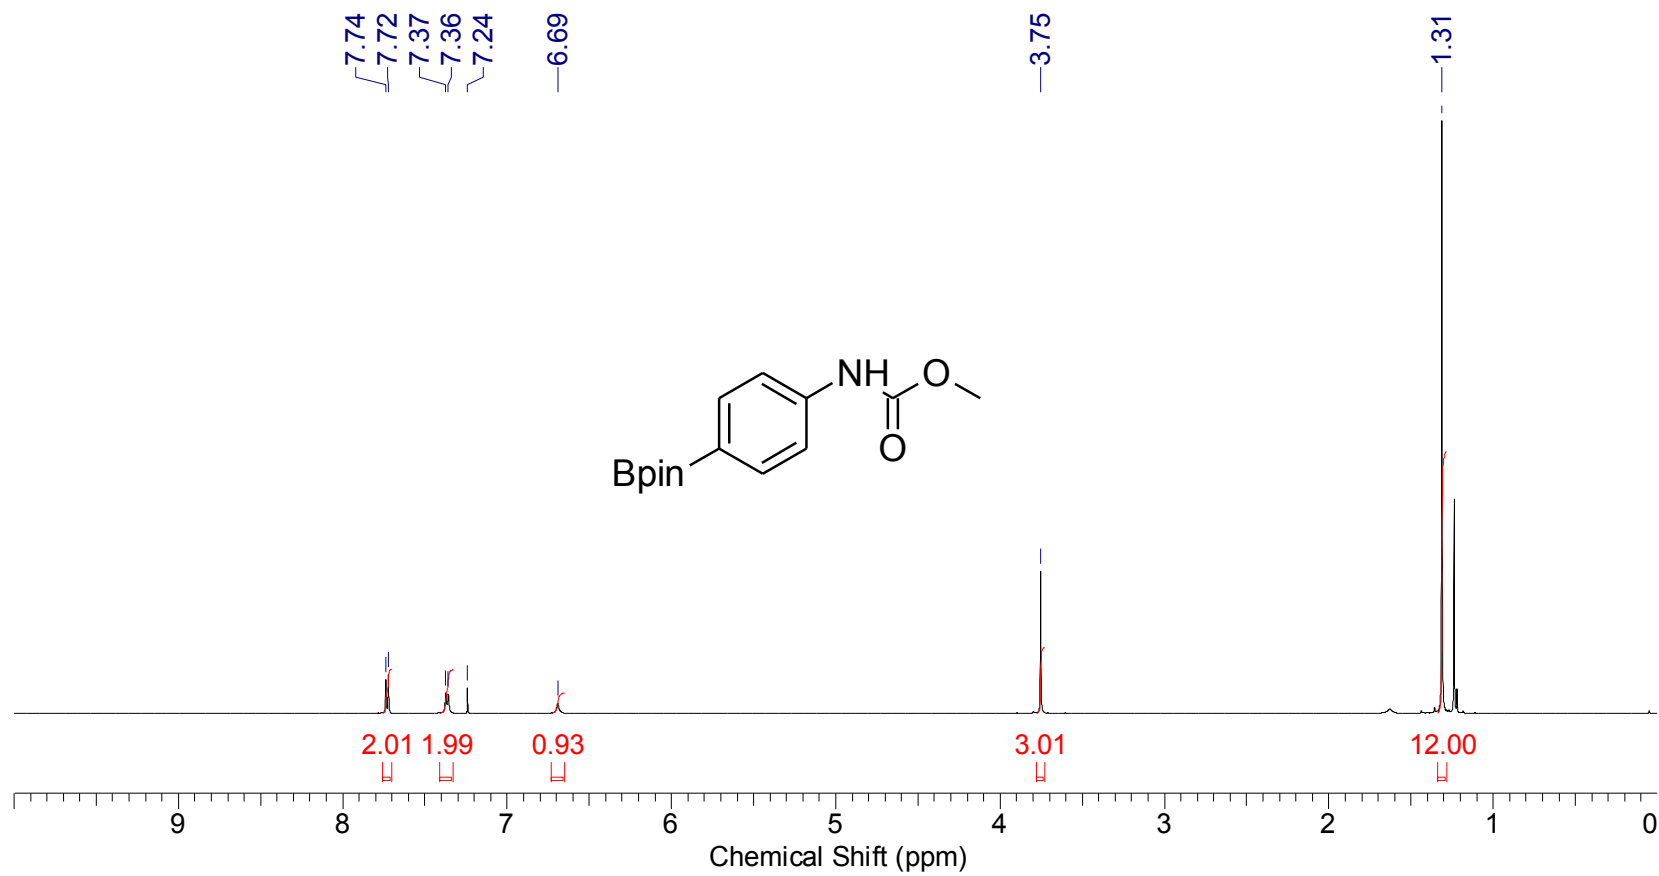

**Figure.** 500 MHz  $^1\text{H}$  NMR spectrum

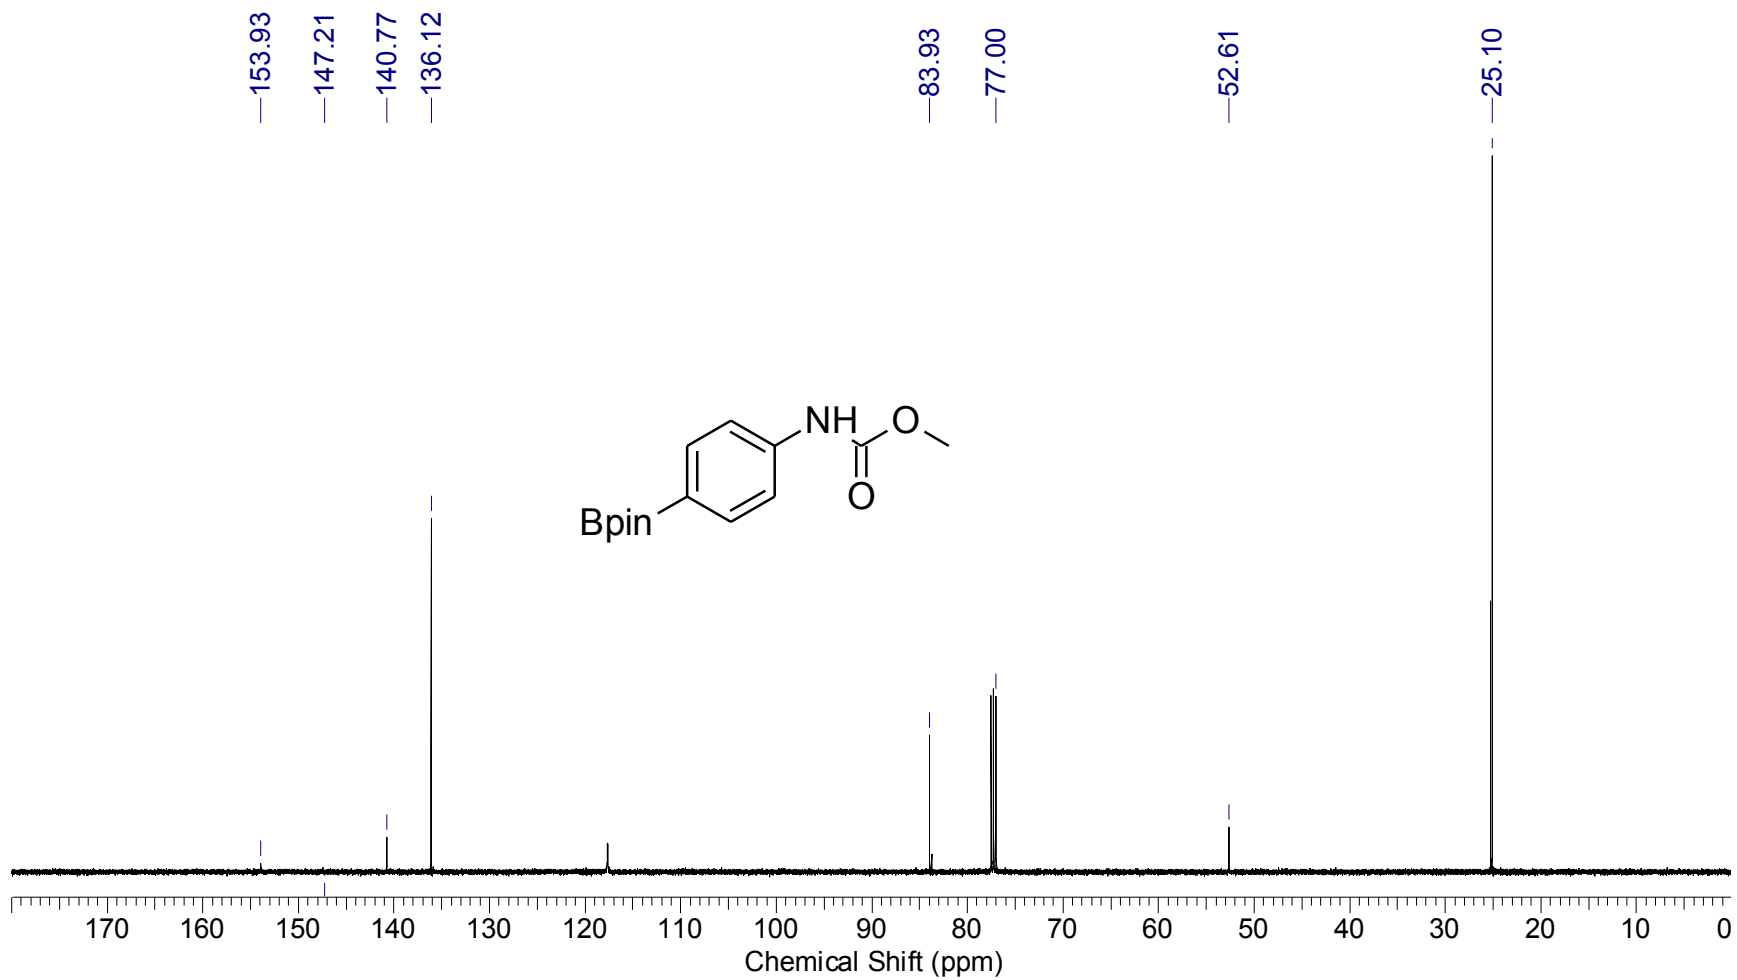

**Figure.** 126 MHz  $^{13}\text{C}$  NMR spectrum

500MHz CDCl<sub>3</sub>=7.24p 1H  
5-Cl-3-BPin-N-(Boc)2-aniline

Pulse Sequence: s2pul

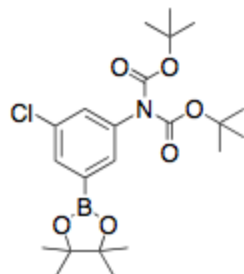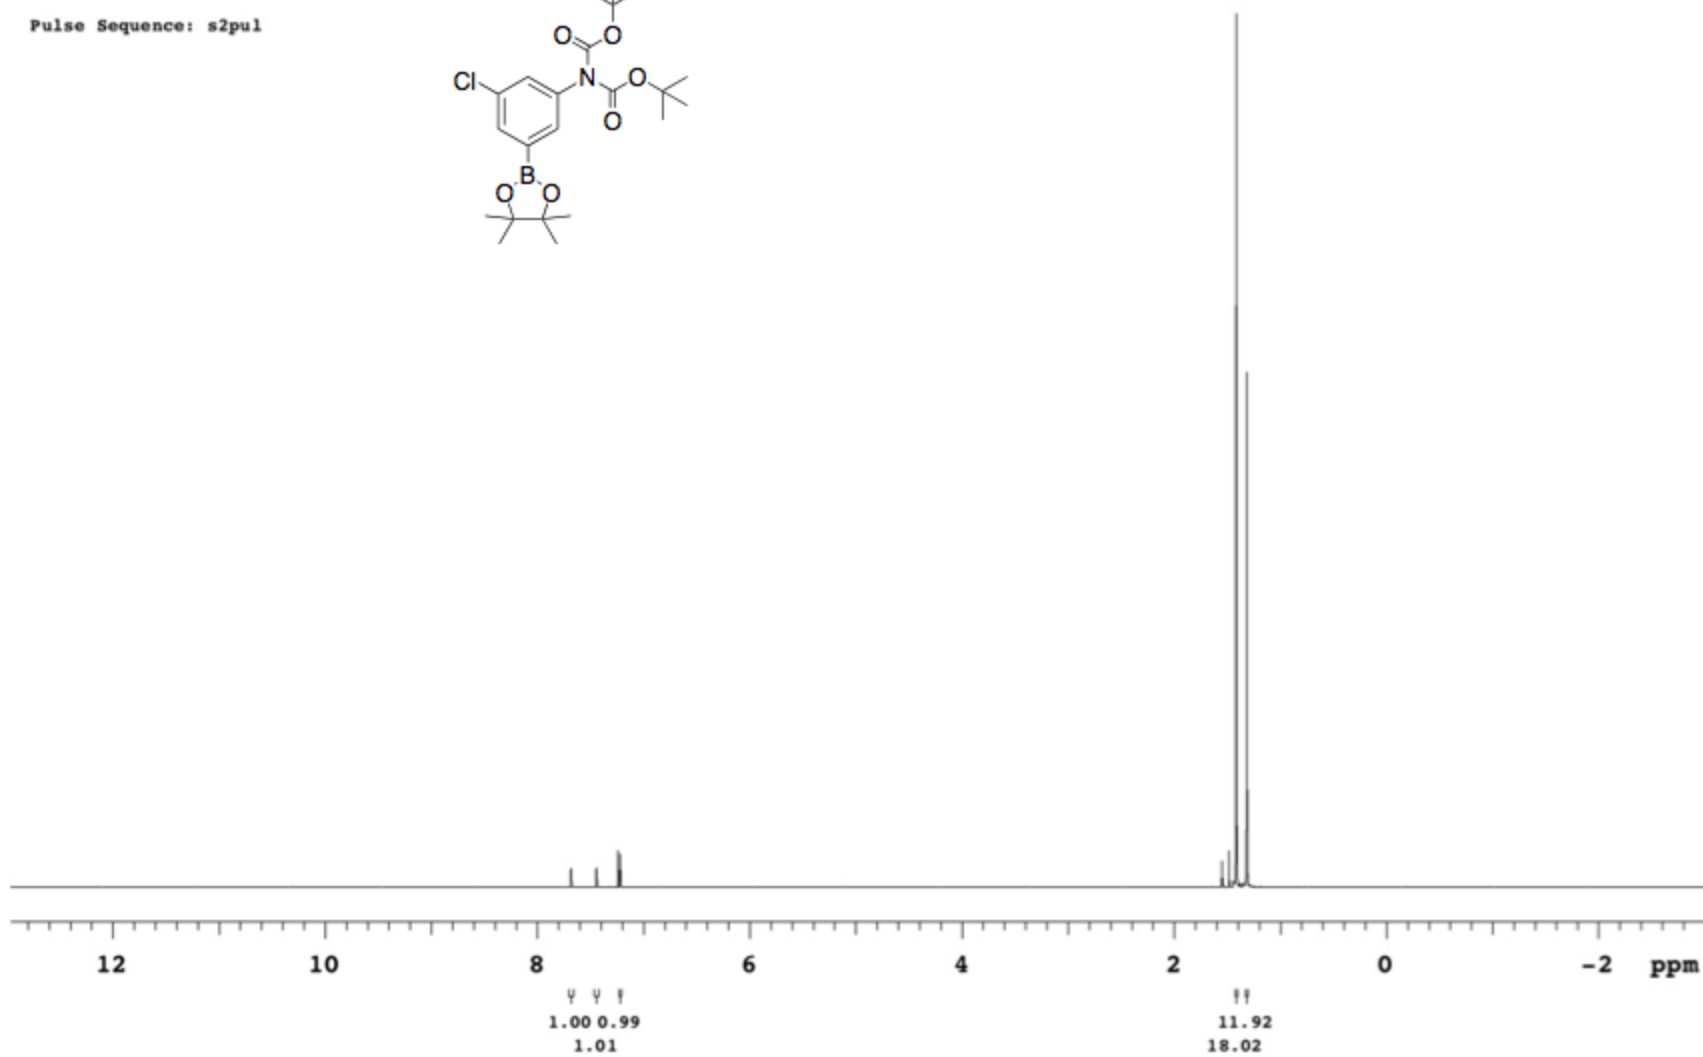

Figure. 500 MHz <sup>1</sup>H NMR spectrum

126MHz CDCl<sub>3</sub>=77p 13C  
5-Cl-3-BPin-N-(Boc)2-aniline

Pulse Sequence: s2pul

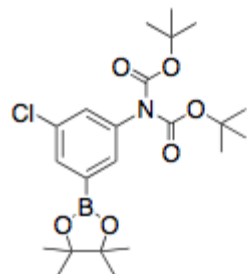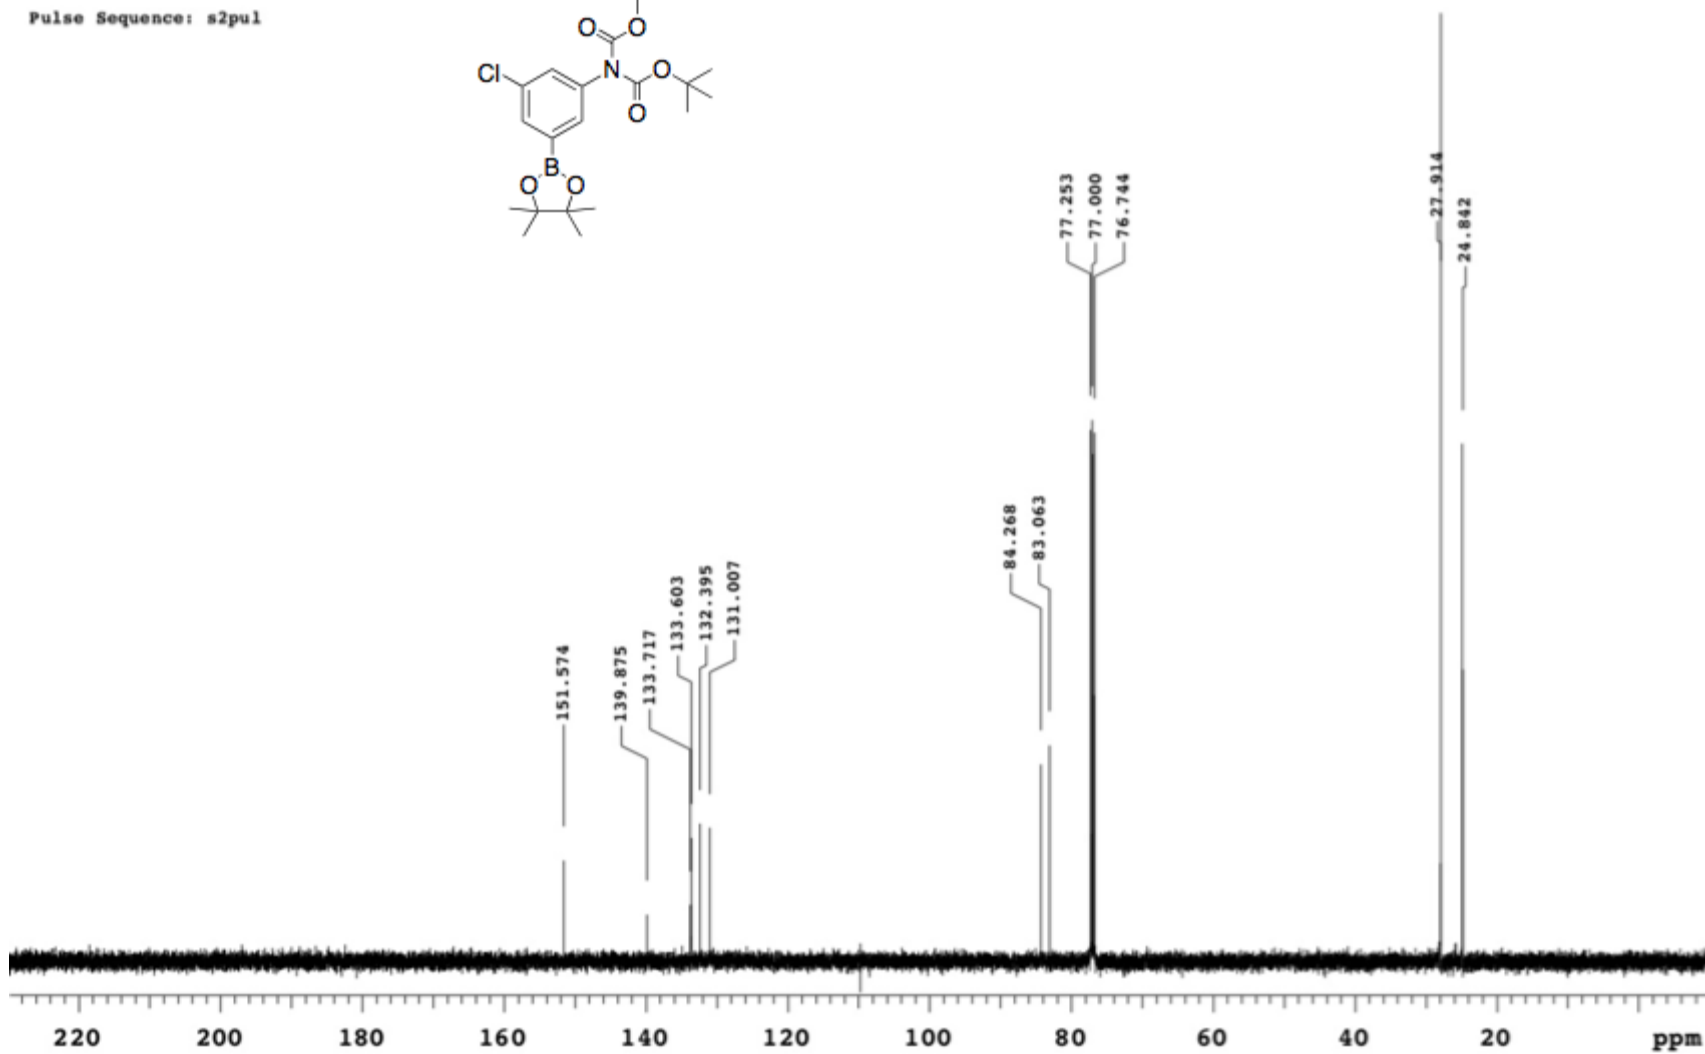

*Figure.* 126 MHz <sup>13</sup>C NMR spectrum

600MHz CDCl3=7.24p 1H  
N-Boc-5-chloro-3-BPin-aniline

Pulse Sequence: s2pul

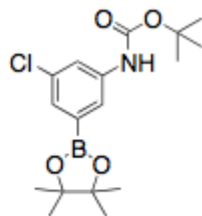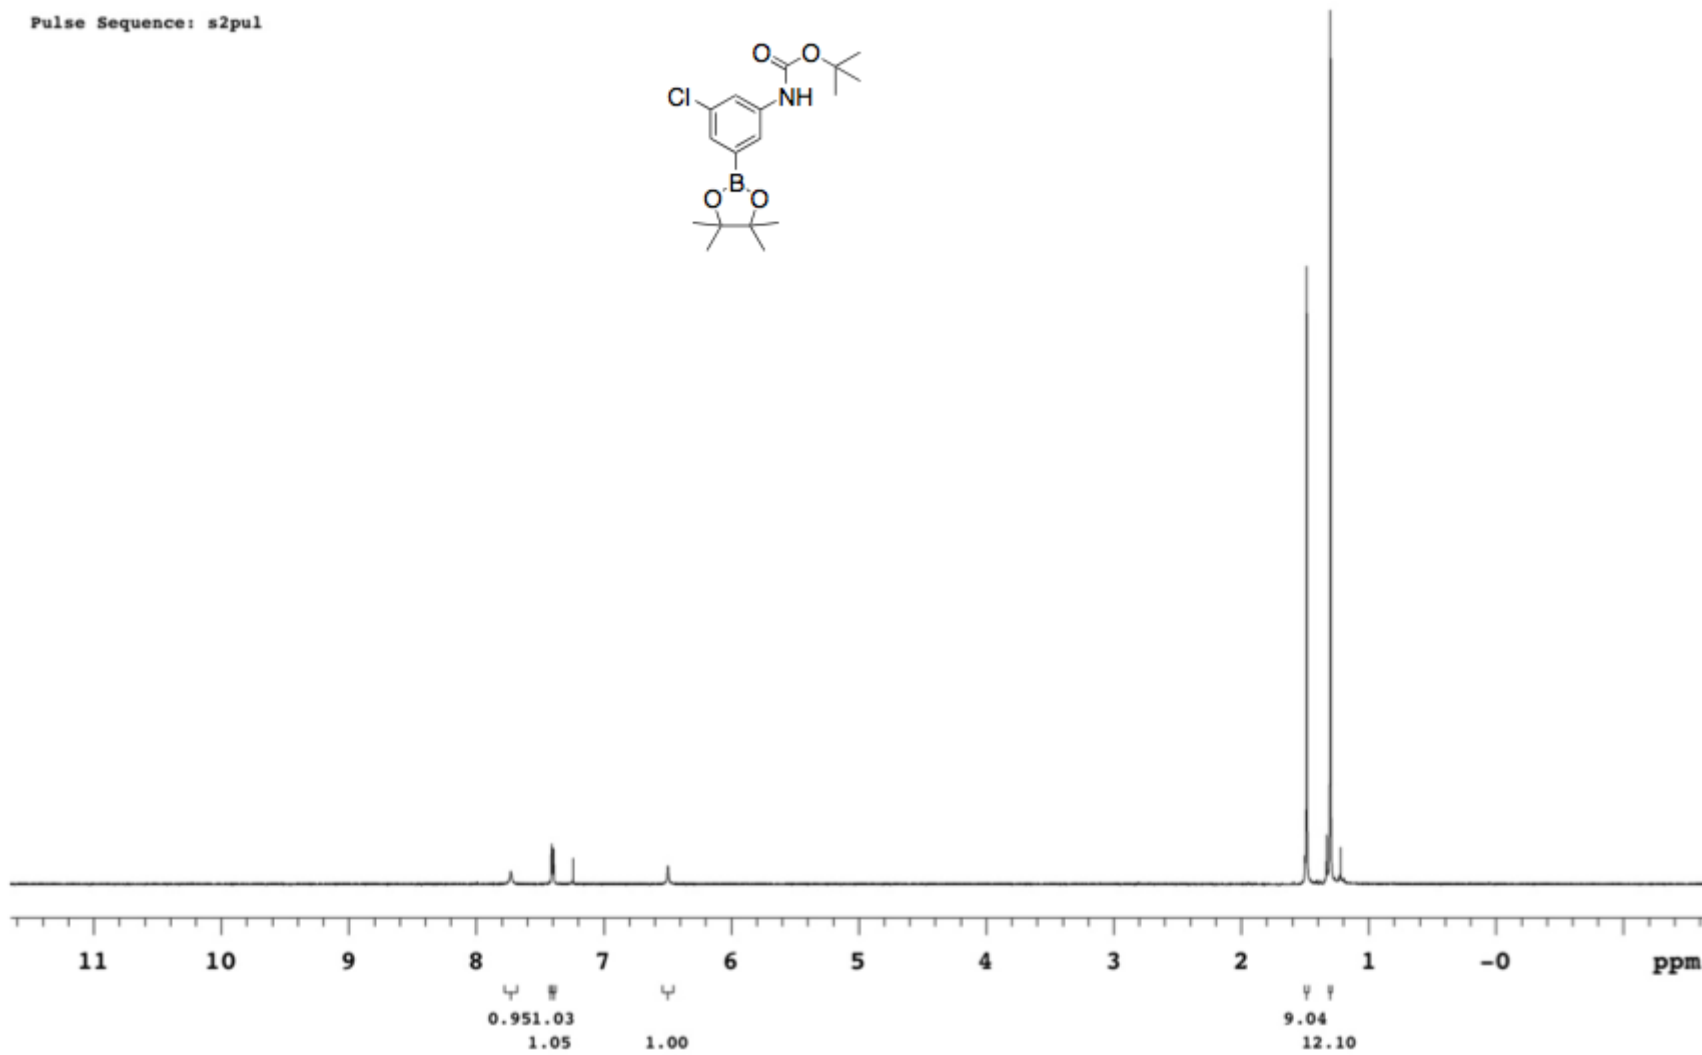

*Figure.* 600 MHz  $^1\text{H}$  NMR spectrum of **8a**

151MHz CDCl<sub>3</sub>=77p 13C  
N-Boc-5-chloro-3-BPin-aniline

Pulse Sequence: s2pul

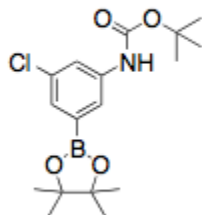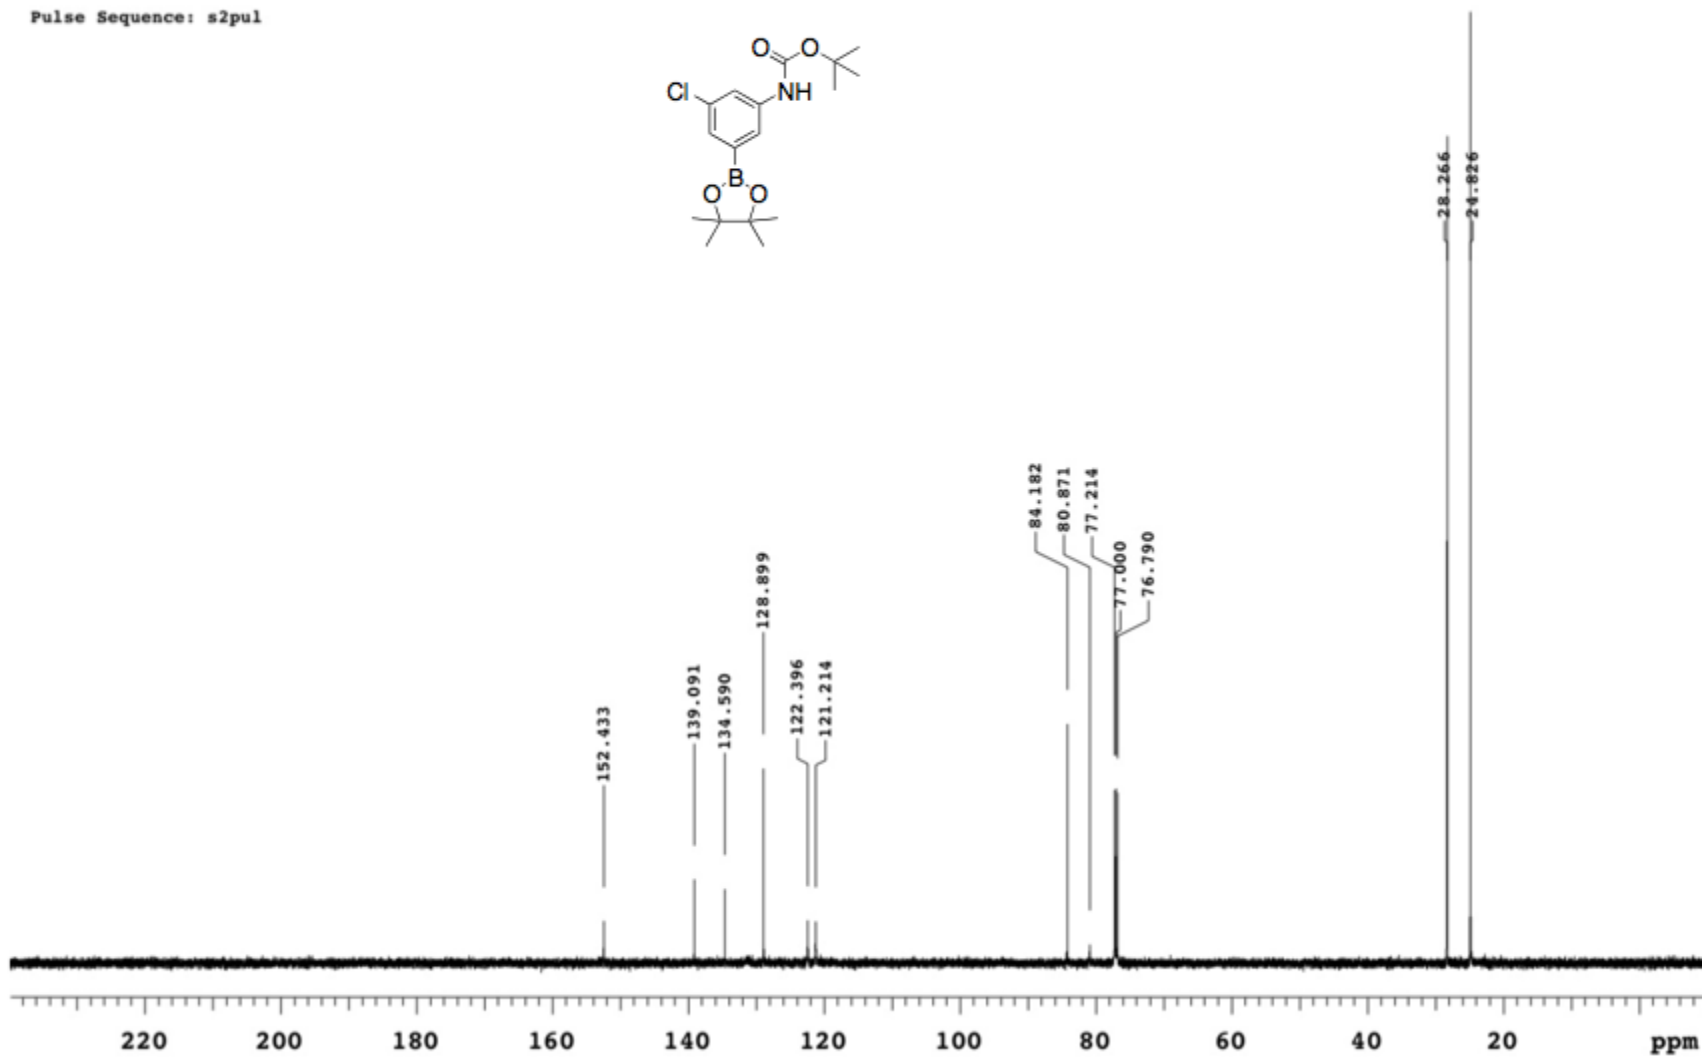

Figure. 151 MHz <sup>13</sup>C NMR spectrum of **8a**

600MHz CDCl3=7.24p 1H  
N-(Boc)-5-chloro-2-BPin-aniline

Pulse Sequence: s2pul

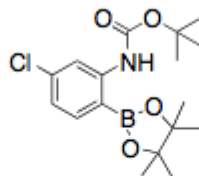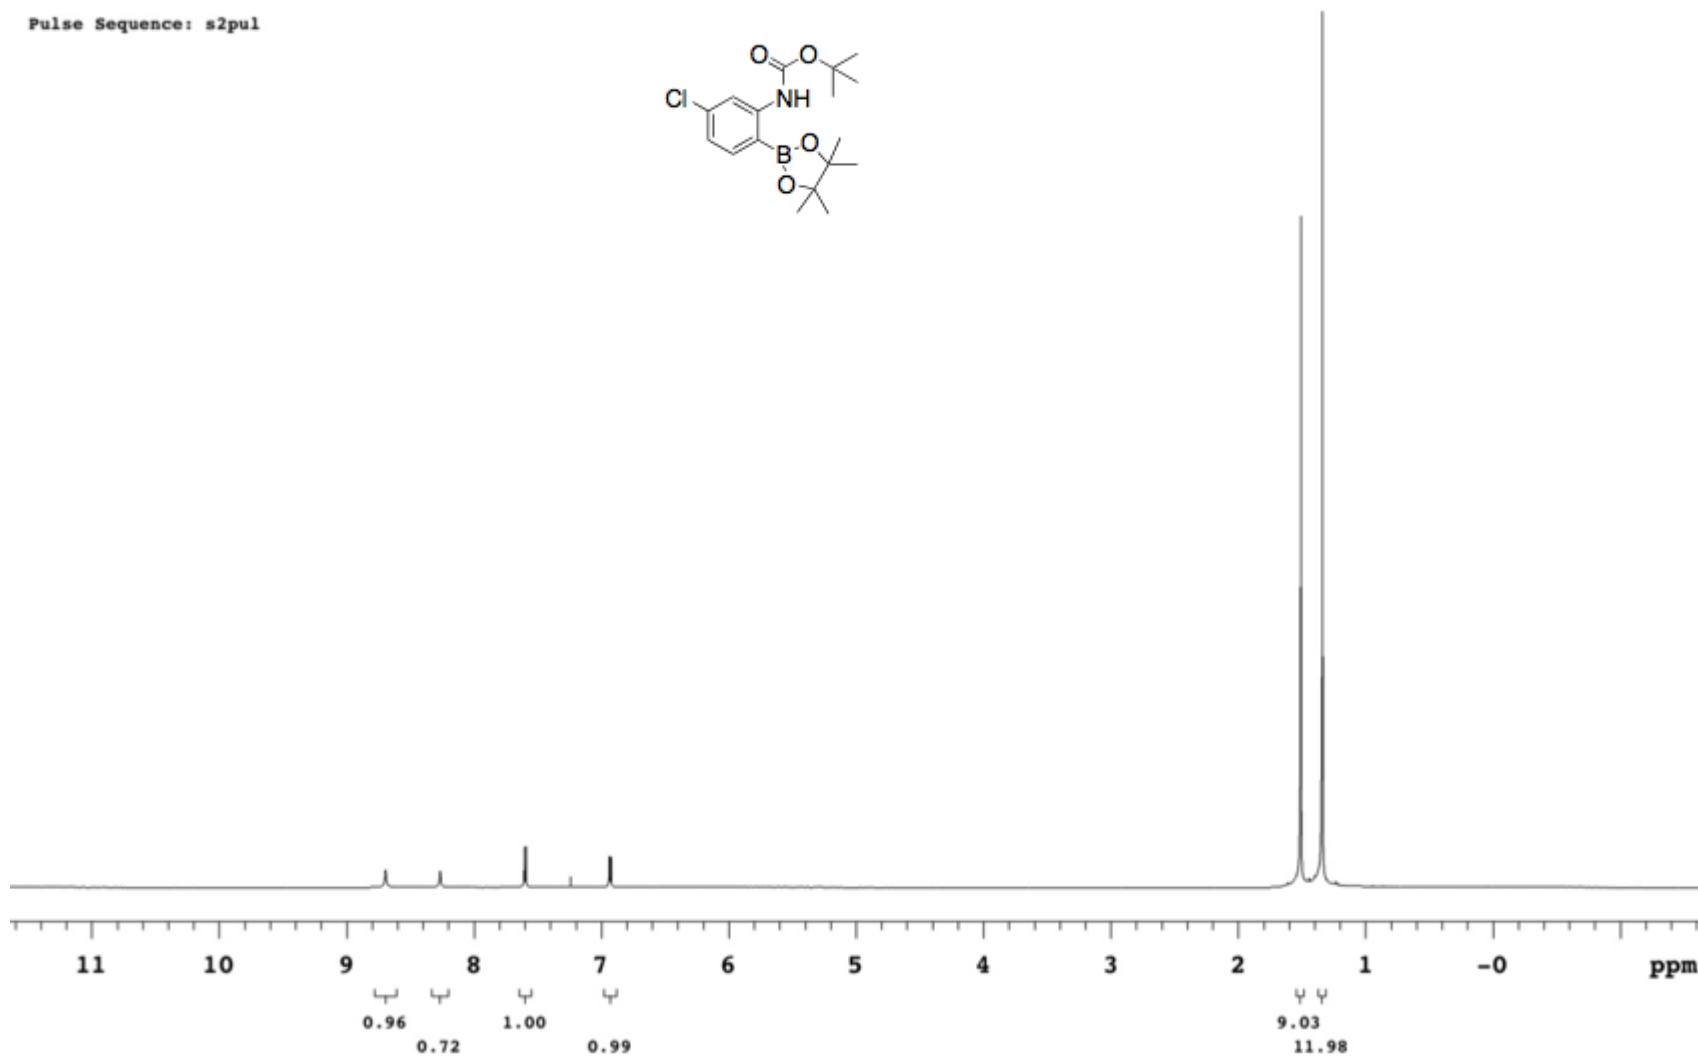

*Figure.* 600 MHz <sup>1</sup>H NMR spectrum of **8b**



151MHz CDCl<sub>3</sub>=77p 13C  
N-(Boc)-5-chloro-2-BPin-aniline

Pulse Sequence: s2pul

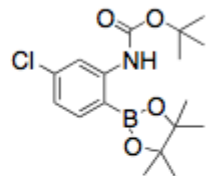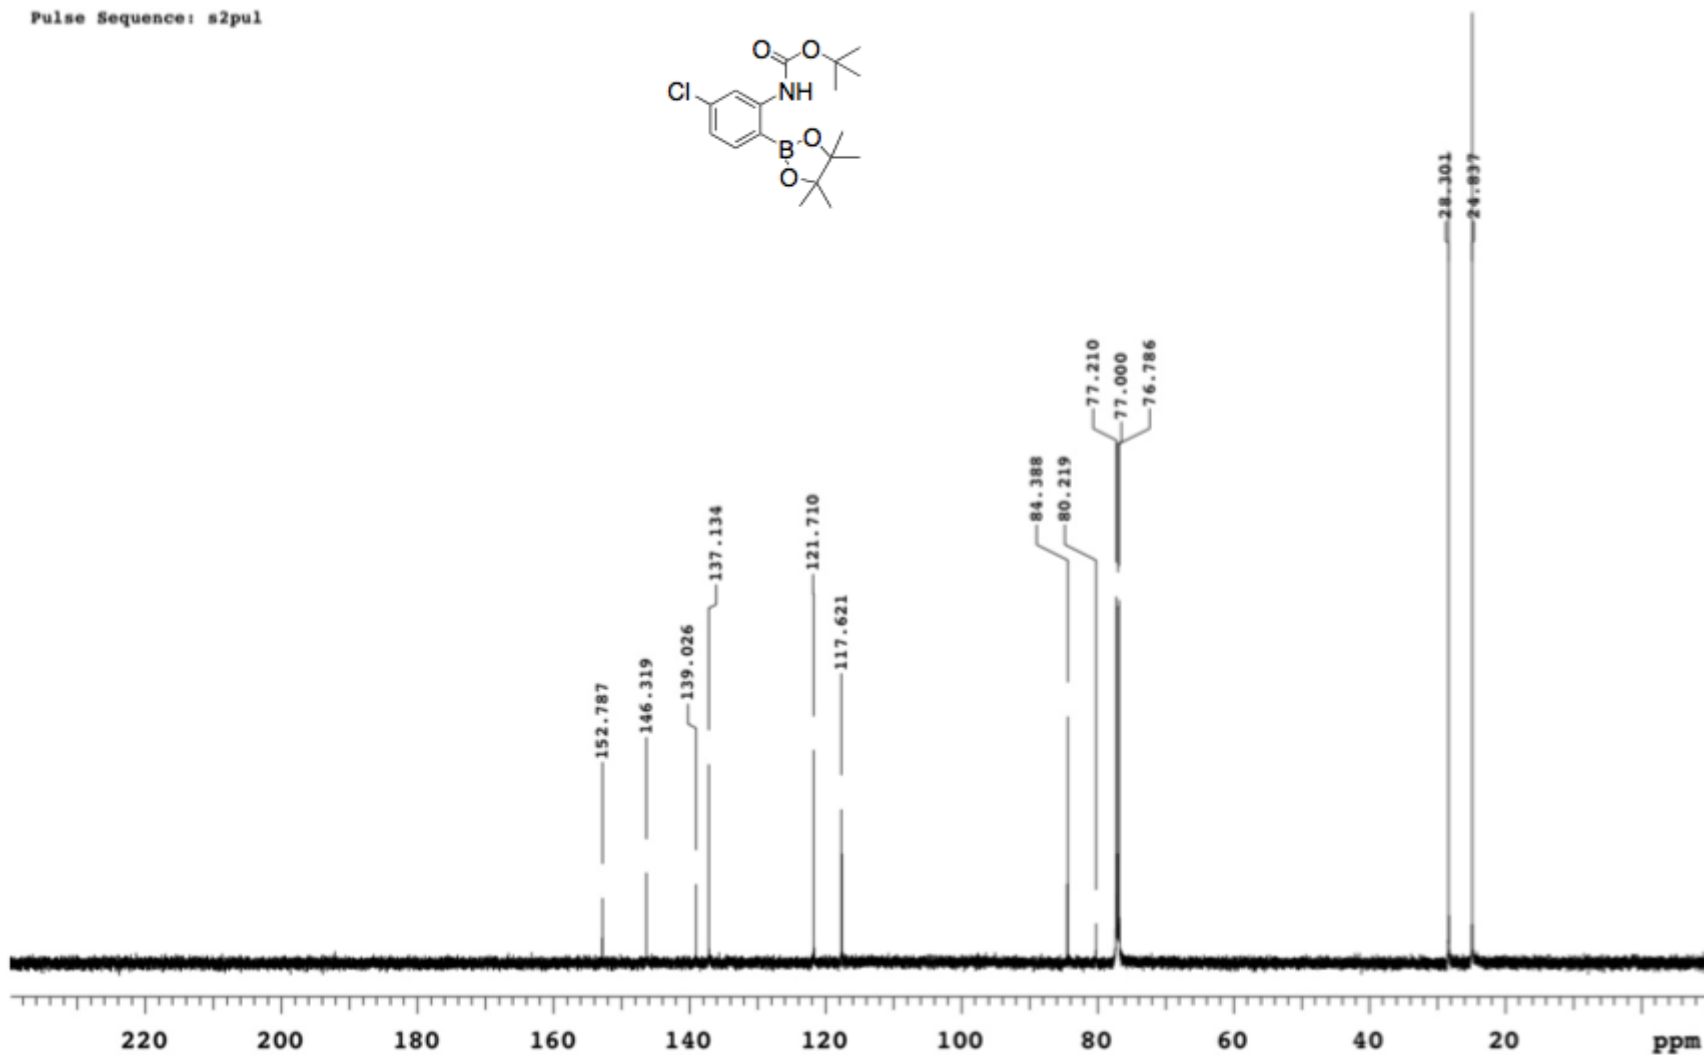

Figure. 151 MHz <sup>13</sup>C NMR spectrum of **8b**

600MHz CDCl3=7.24p nOe  
nt=128  
N-(Boc)-5-chloro-2-BPin-aniline

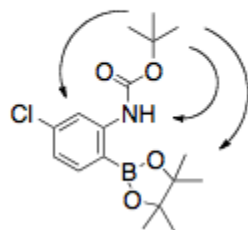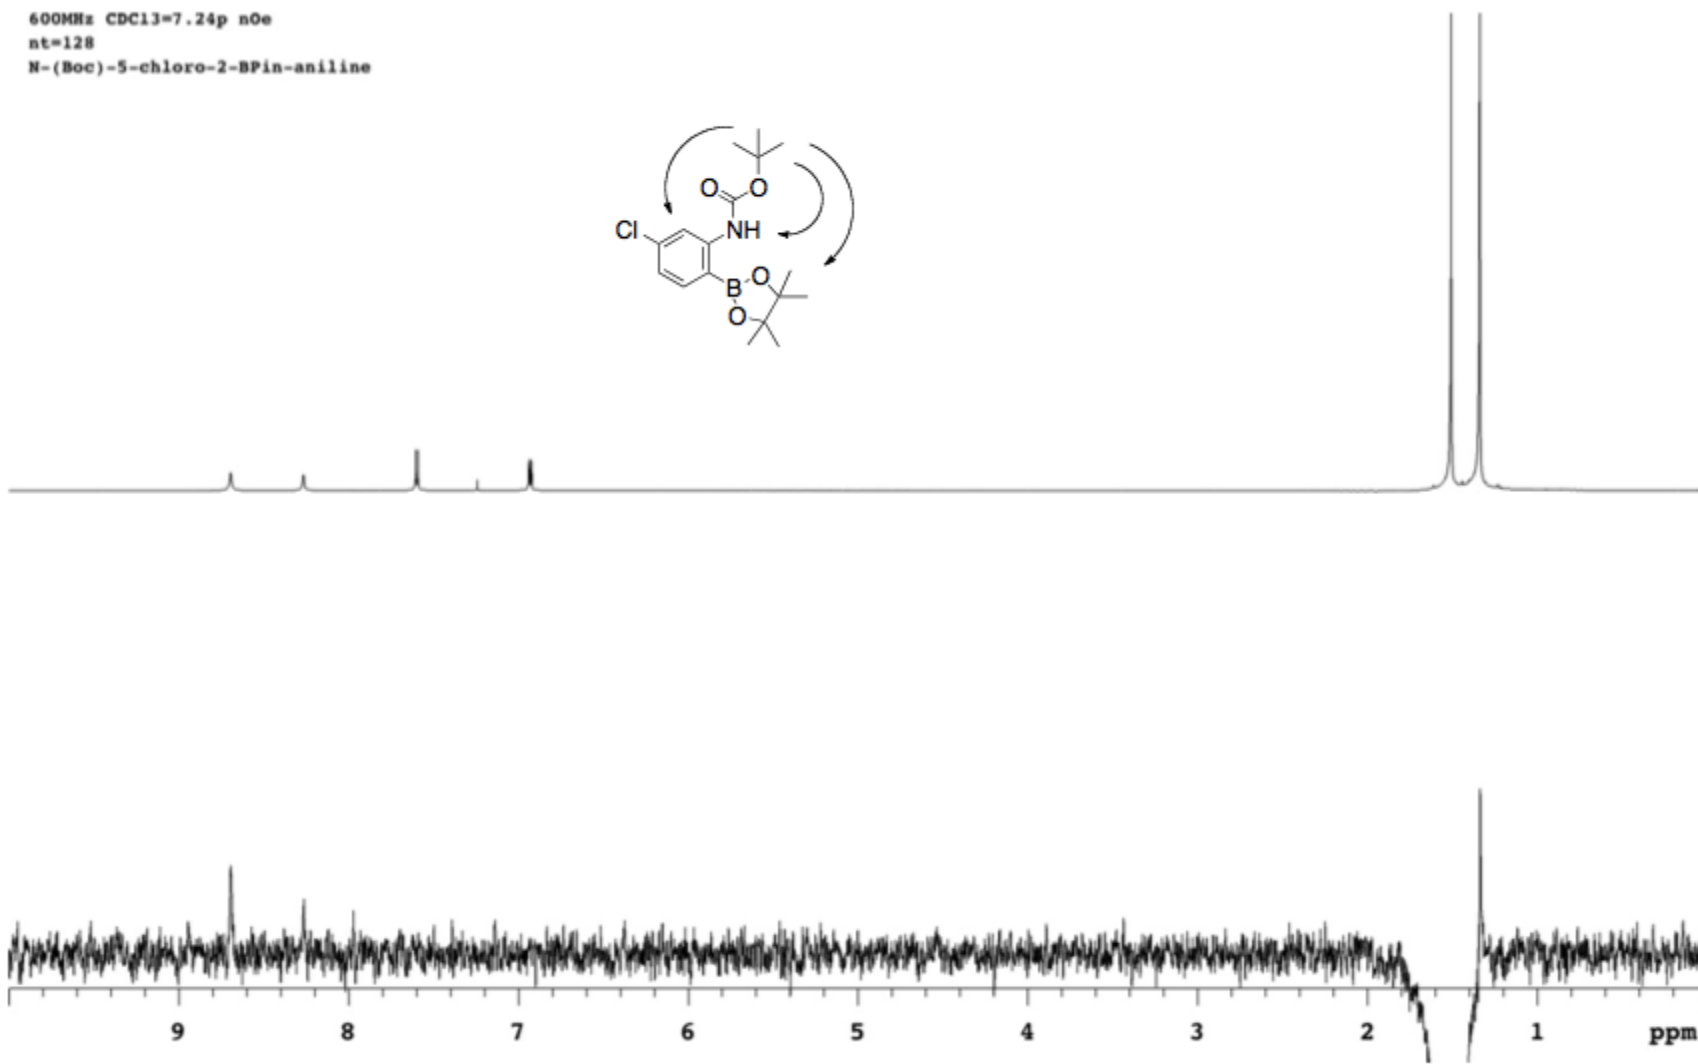

*Figure.* 600 MHz nOe NMR spectrum of **8b**

600MHz CDCl3=7.24p nOe  
nt=128  
N-(Boc)-5-chloro-2-BPin-aniline

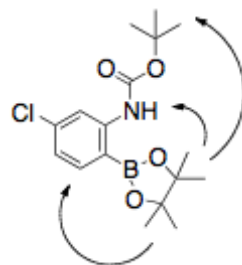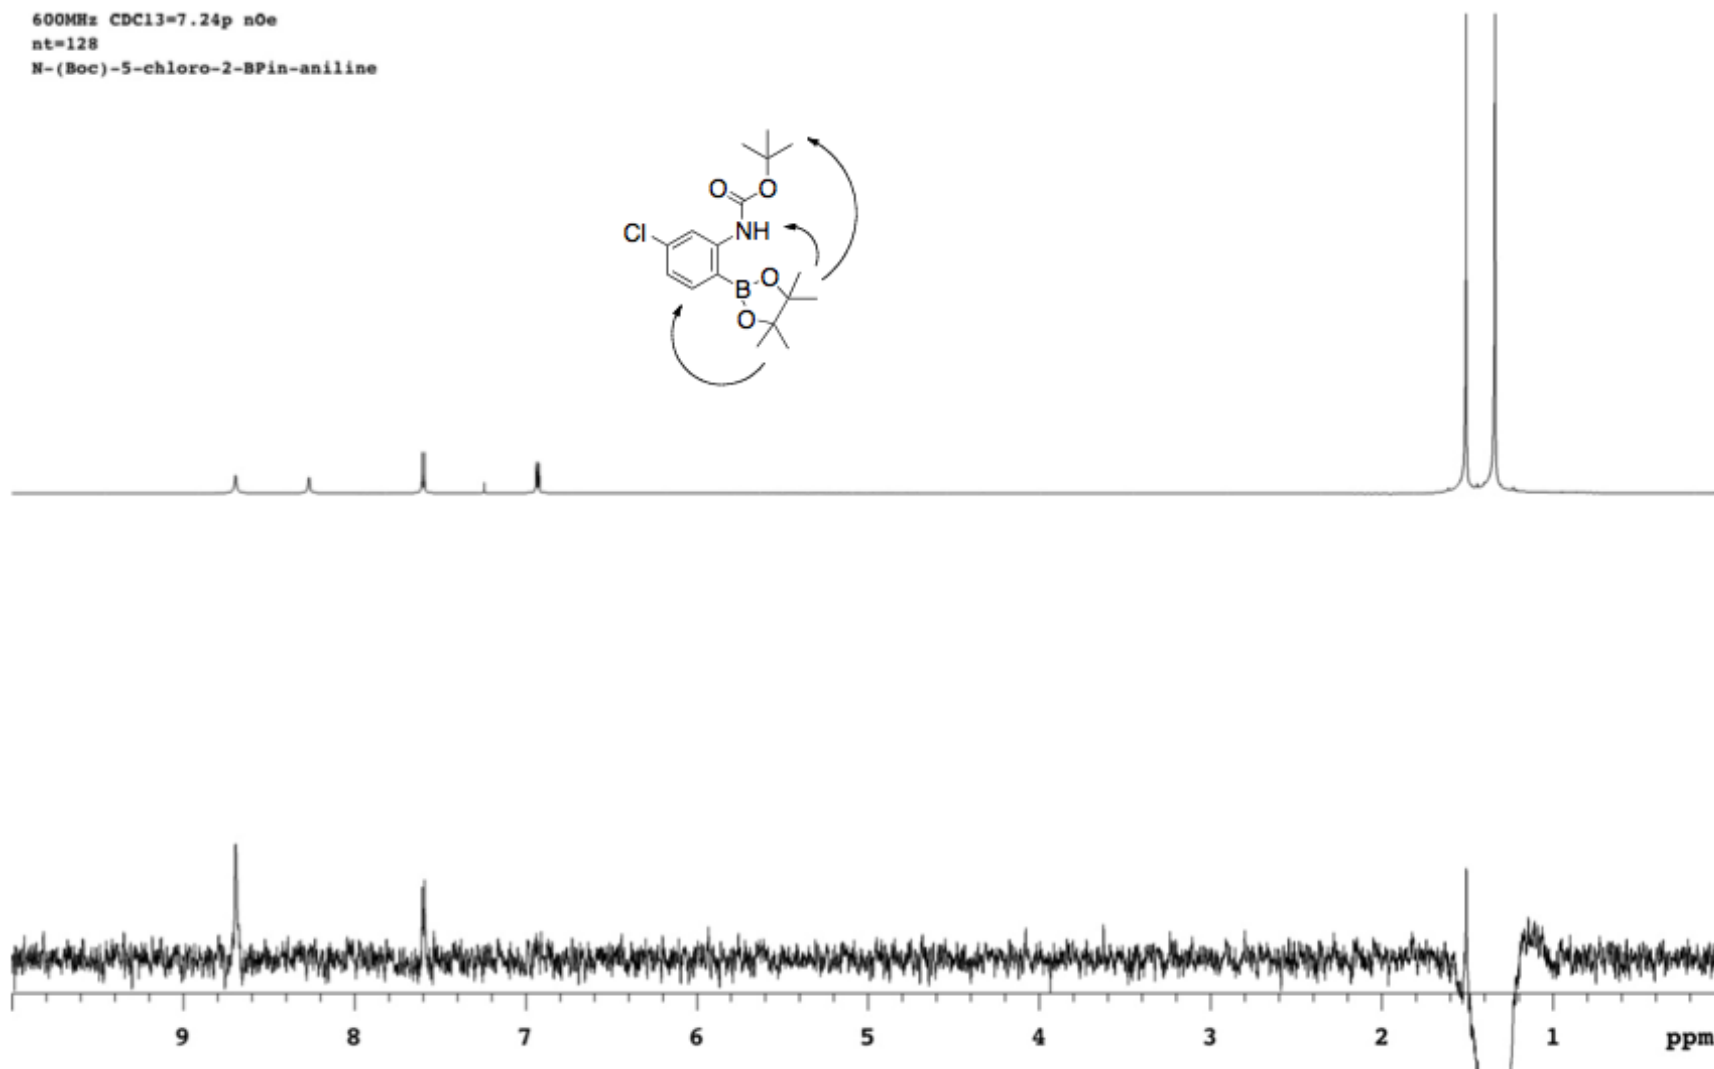

*Figure.* 600 MHz nOe NMR spectrum of **8b**

500MHz CDCl<sub>3</sub>=7.24p 1H  
N-Boc-N-Me-5-BPin-3-chloroaniline

Pulse Sequence: s2pul

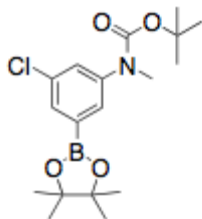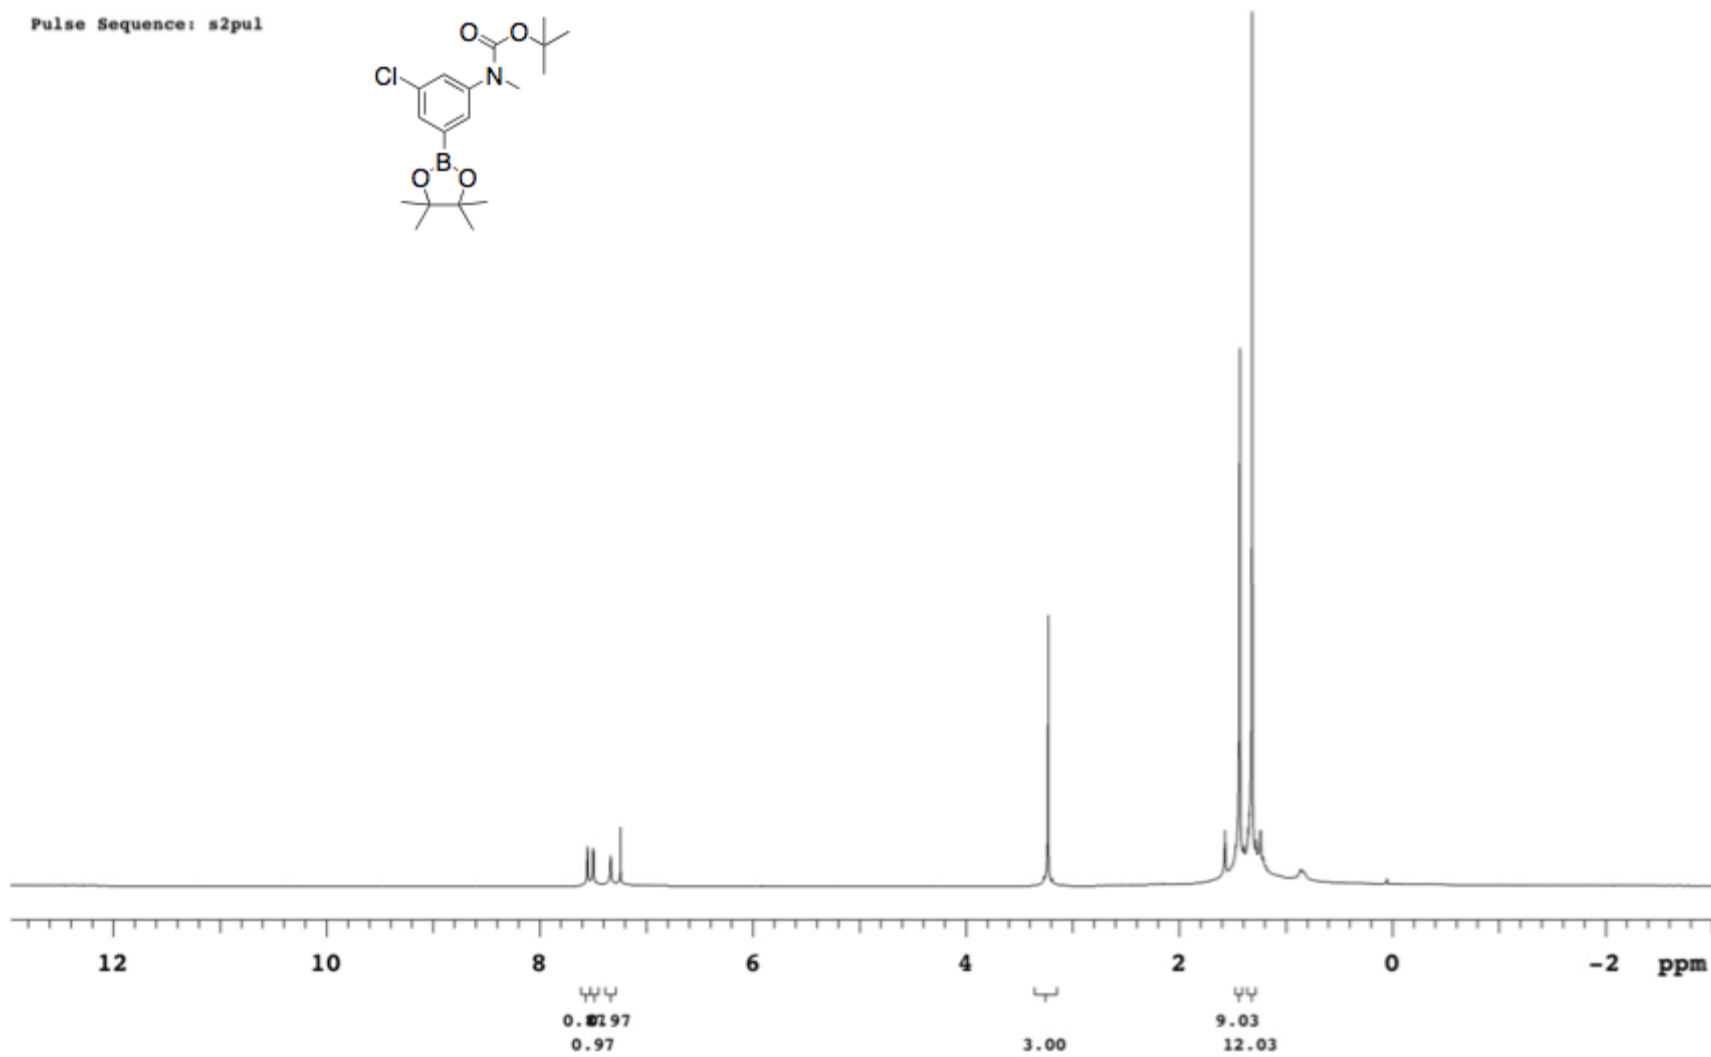

*Figure.* 500 MHz <sup>1</sup>H NMR spectrum of 13a

126MHz Anubis CDC13=77p 13C  
N-Boc-N-Me-5-BPin-3-chloroaniline

Pulse Sequence: s2pul

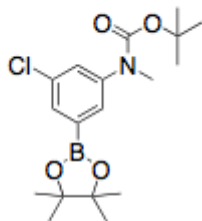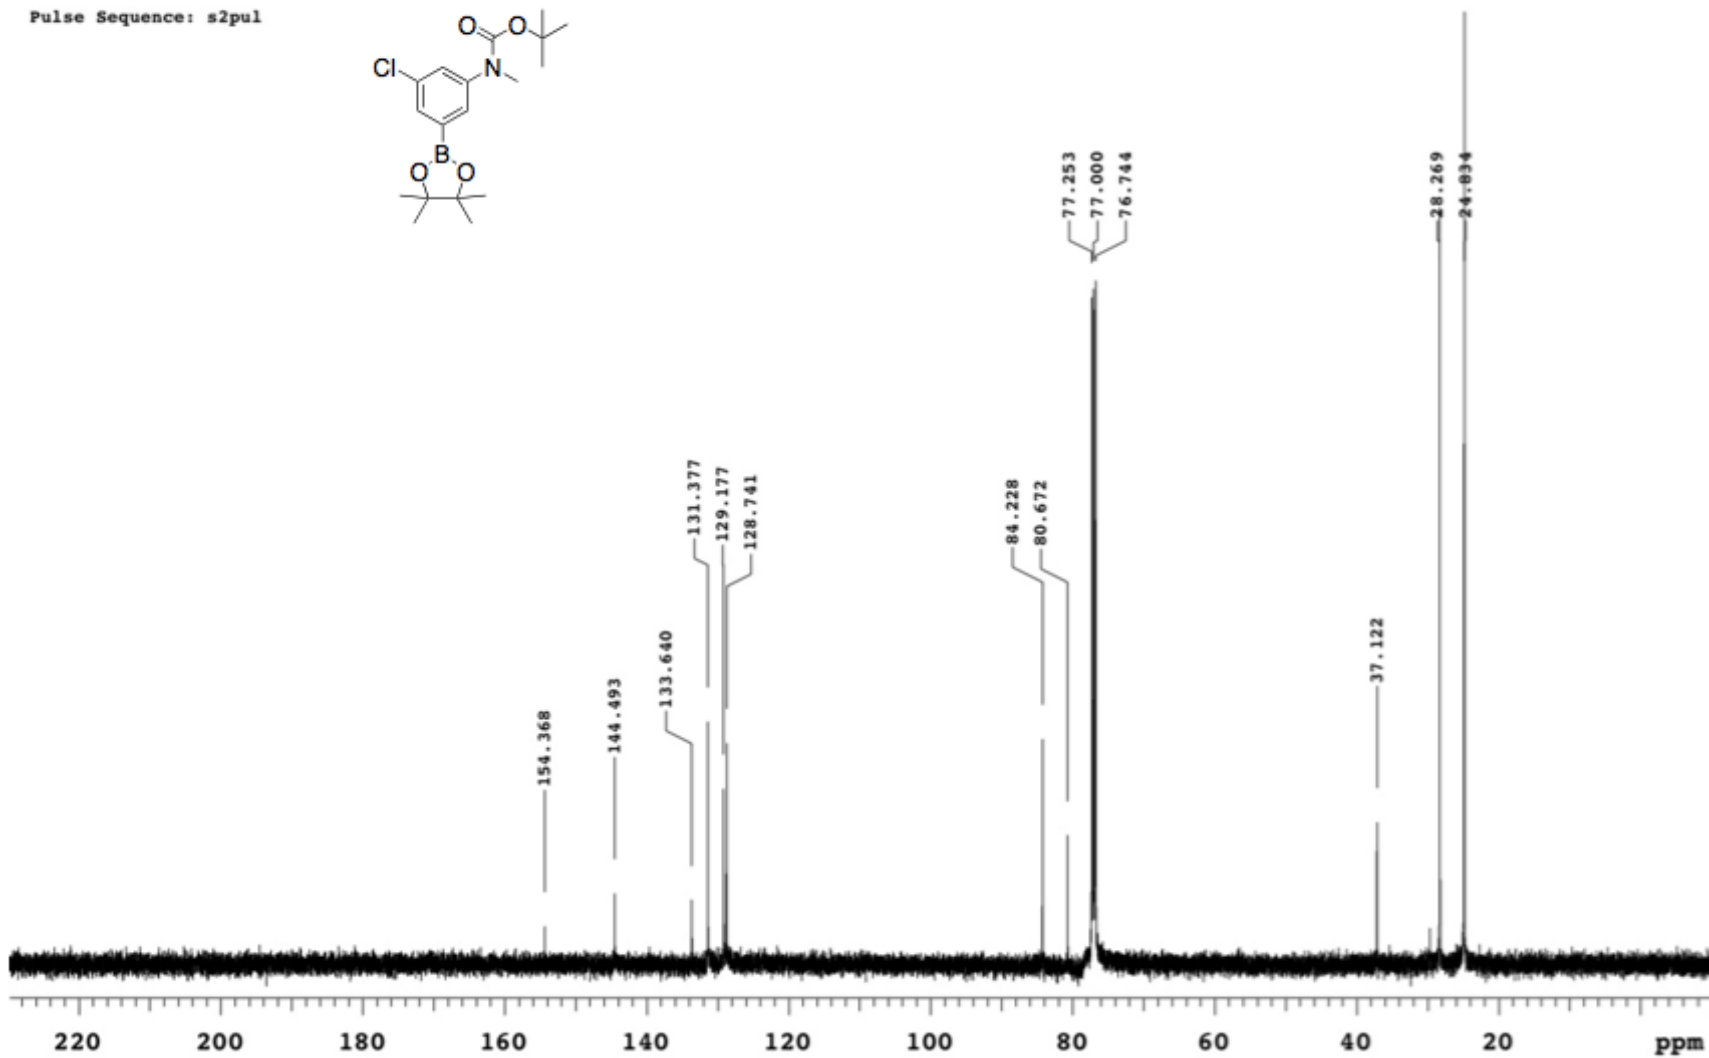

Figure. 126 MHz <sup>13</sup>C NMR spectrum of 13a

500MHz CDCl<sub>3</sub>=7.24p 1H  
5-BPin-3-chlorophenyl t-butylcarbamate  
Pulse Sequence: s2pul

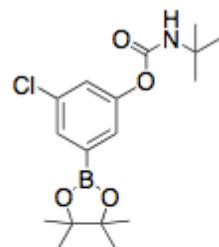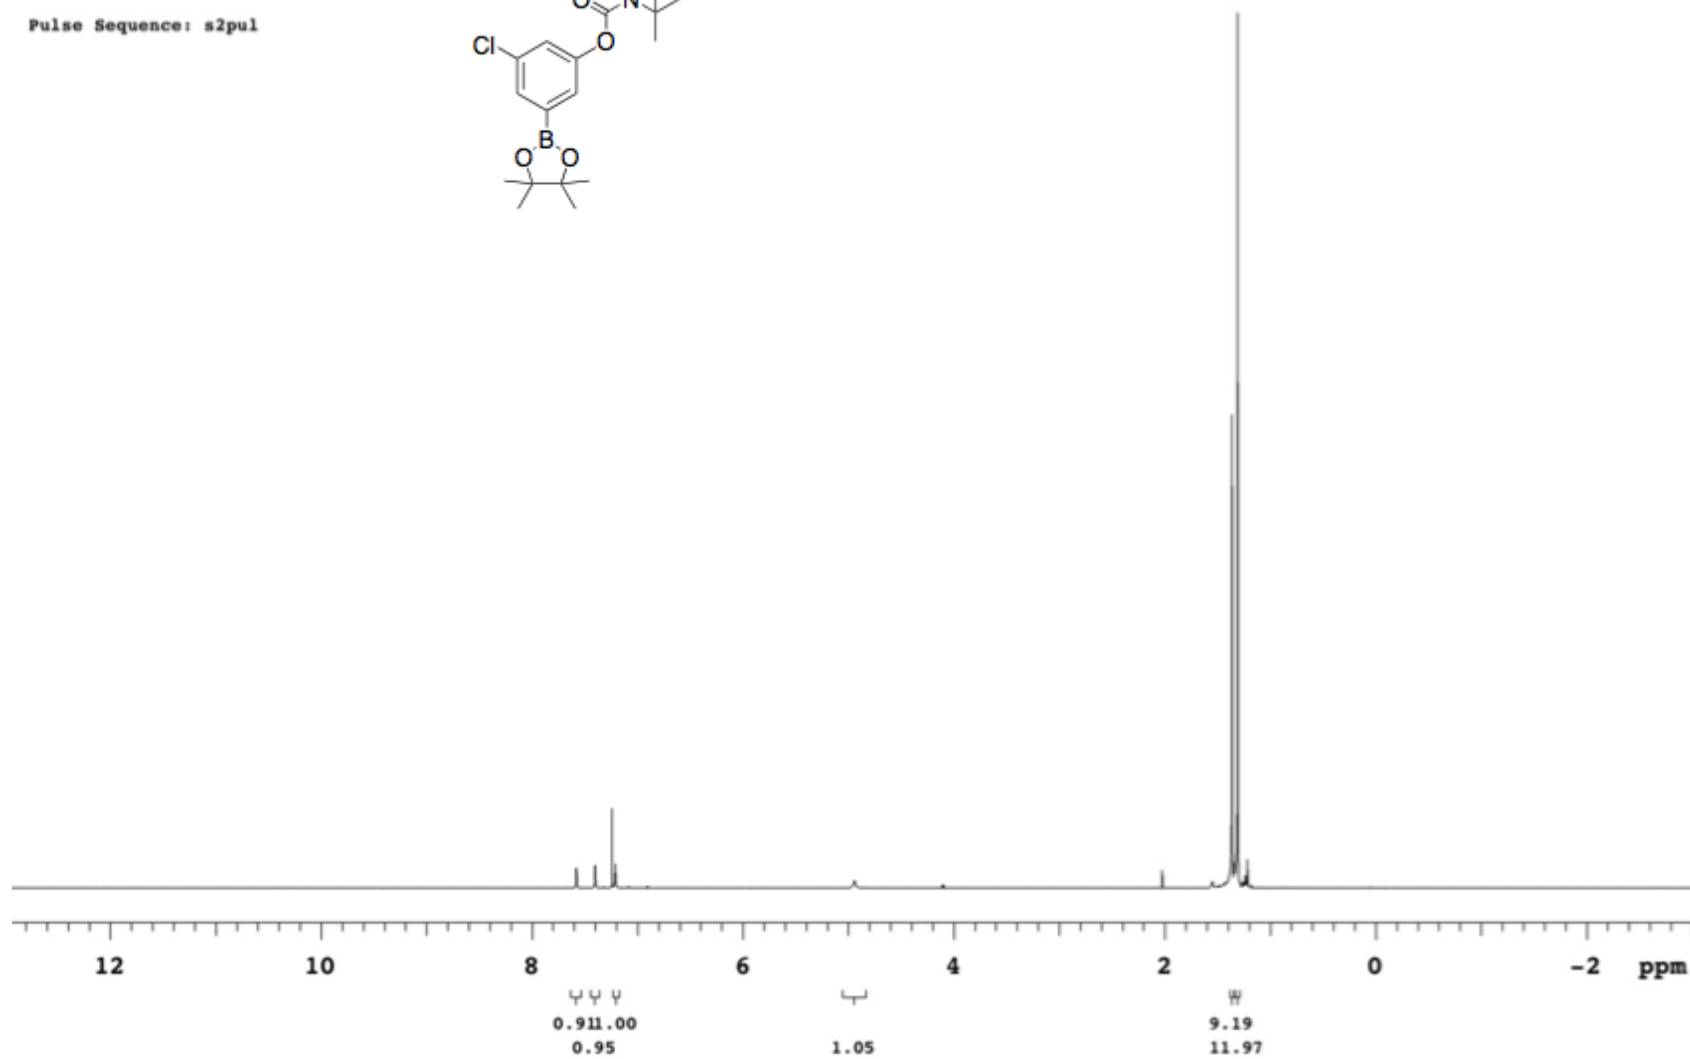

*Figure.* 500 MHz <sup>1</sup>H NMR spectrum of **13b**

126MHz CDCl<sub>3</sub>=77p 13C  
5-BPin-3-Clphenyl t-butylcarbamate  
Pulse Sequence: s2pul

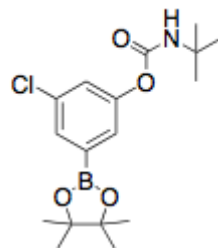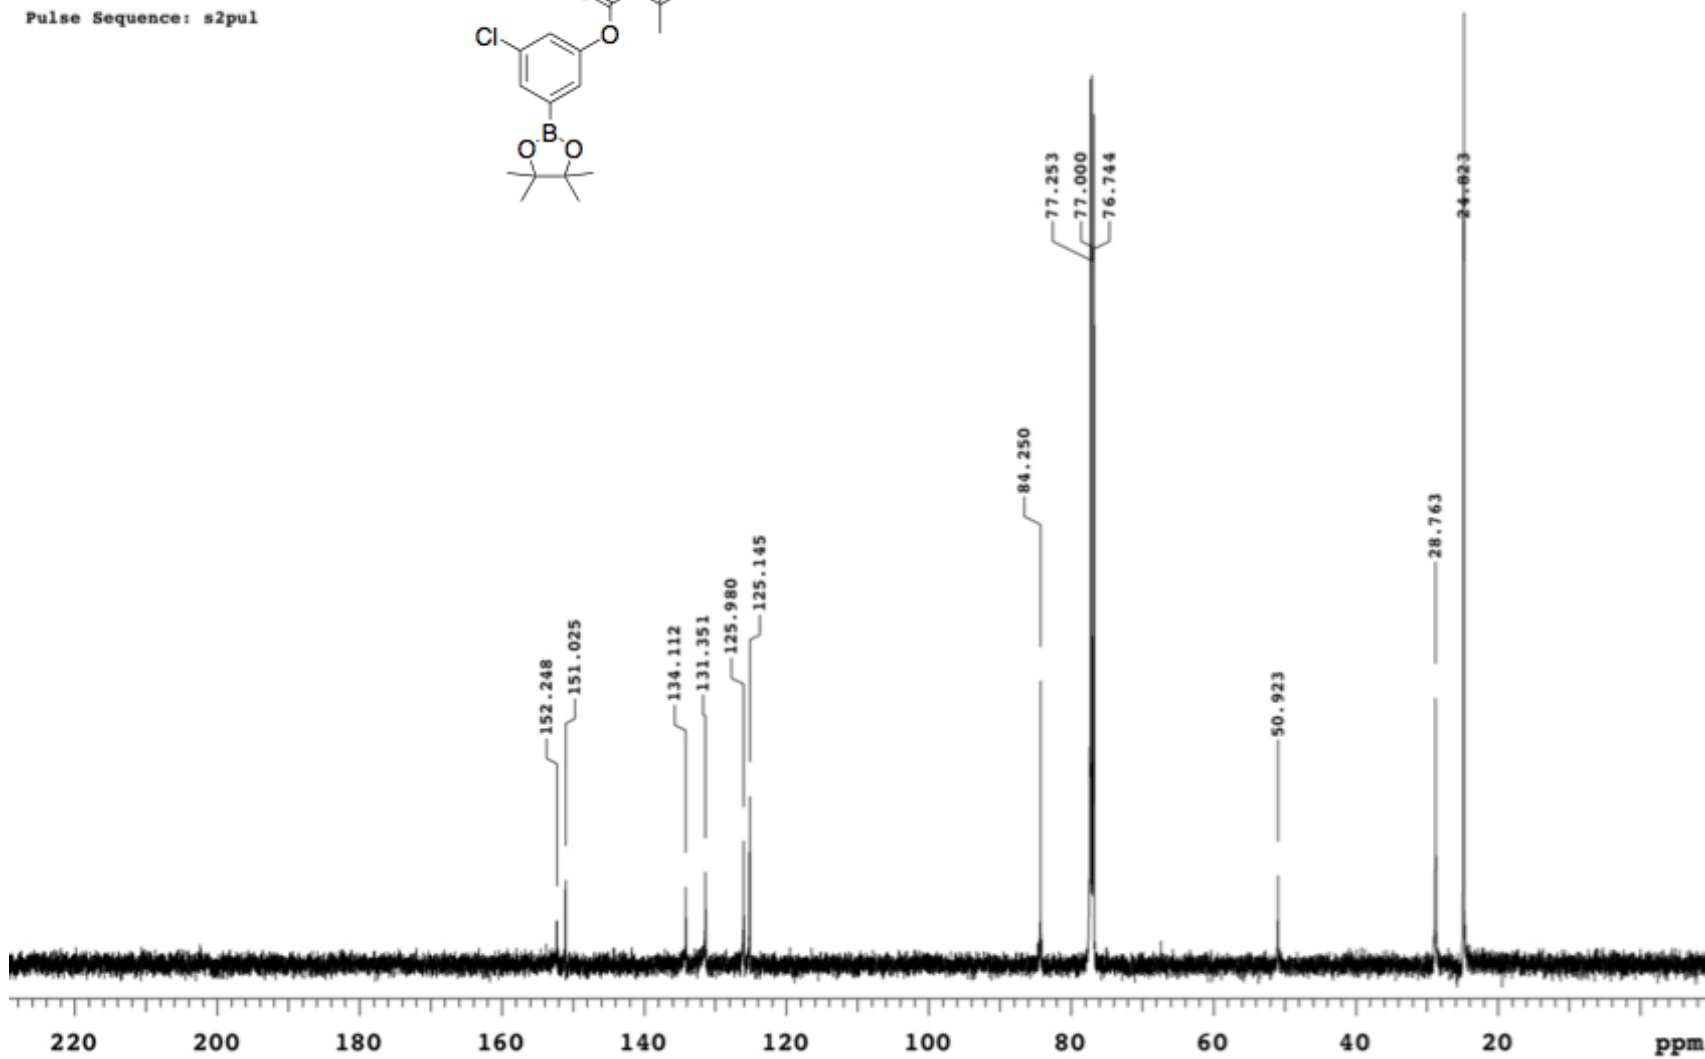

*Figure.* 126 MHz <sup>13</sup>C NMR spectrum of **13b**

500MHz CDCl3=7.24p 1H  
N-(5-Cl-3-BPin-phenyl)neopentylamide

Pulse Sequence: s2pul

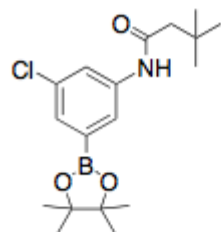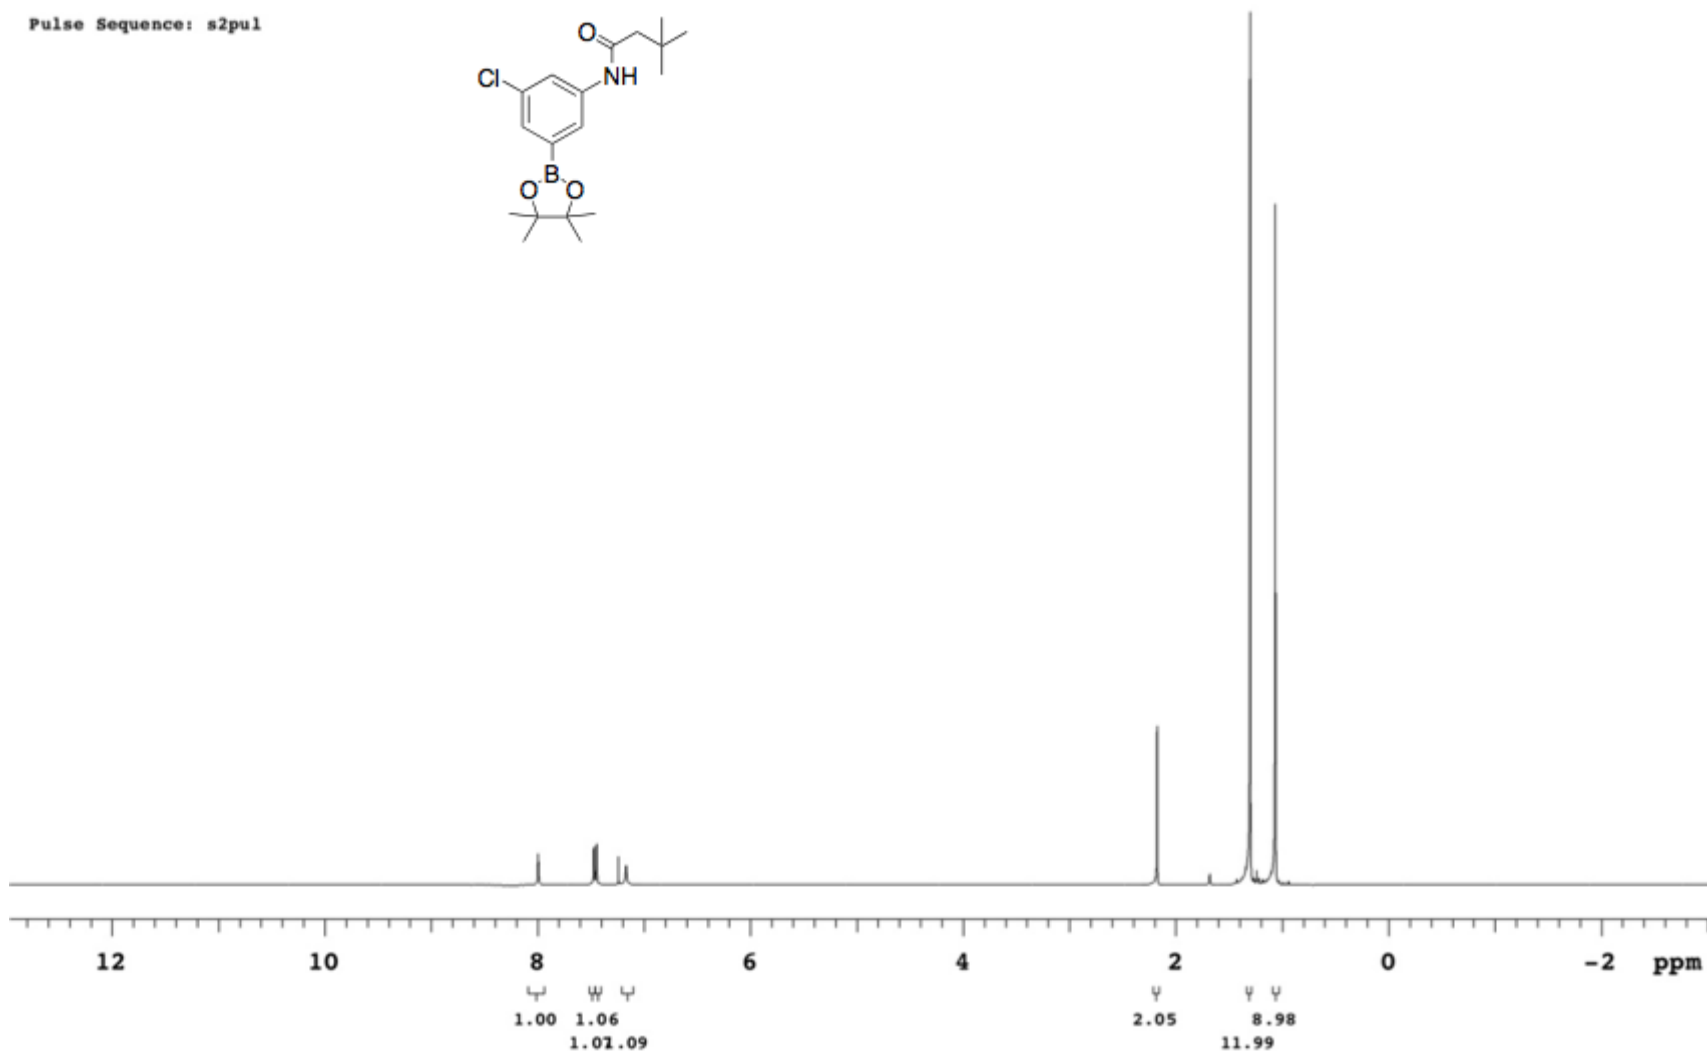

Figure. 500 MHz <sup>1</sup>H NMR spectrum of 13c



126MHz CDCl<sub>3</sub>=77p 13C  
N-(5-Cl-3-BPin-phenyl)neopentylamide

Pulse Sequence: s2pul

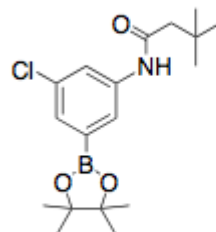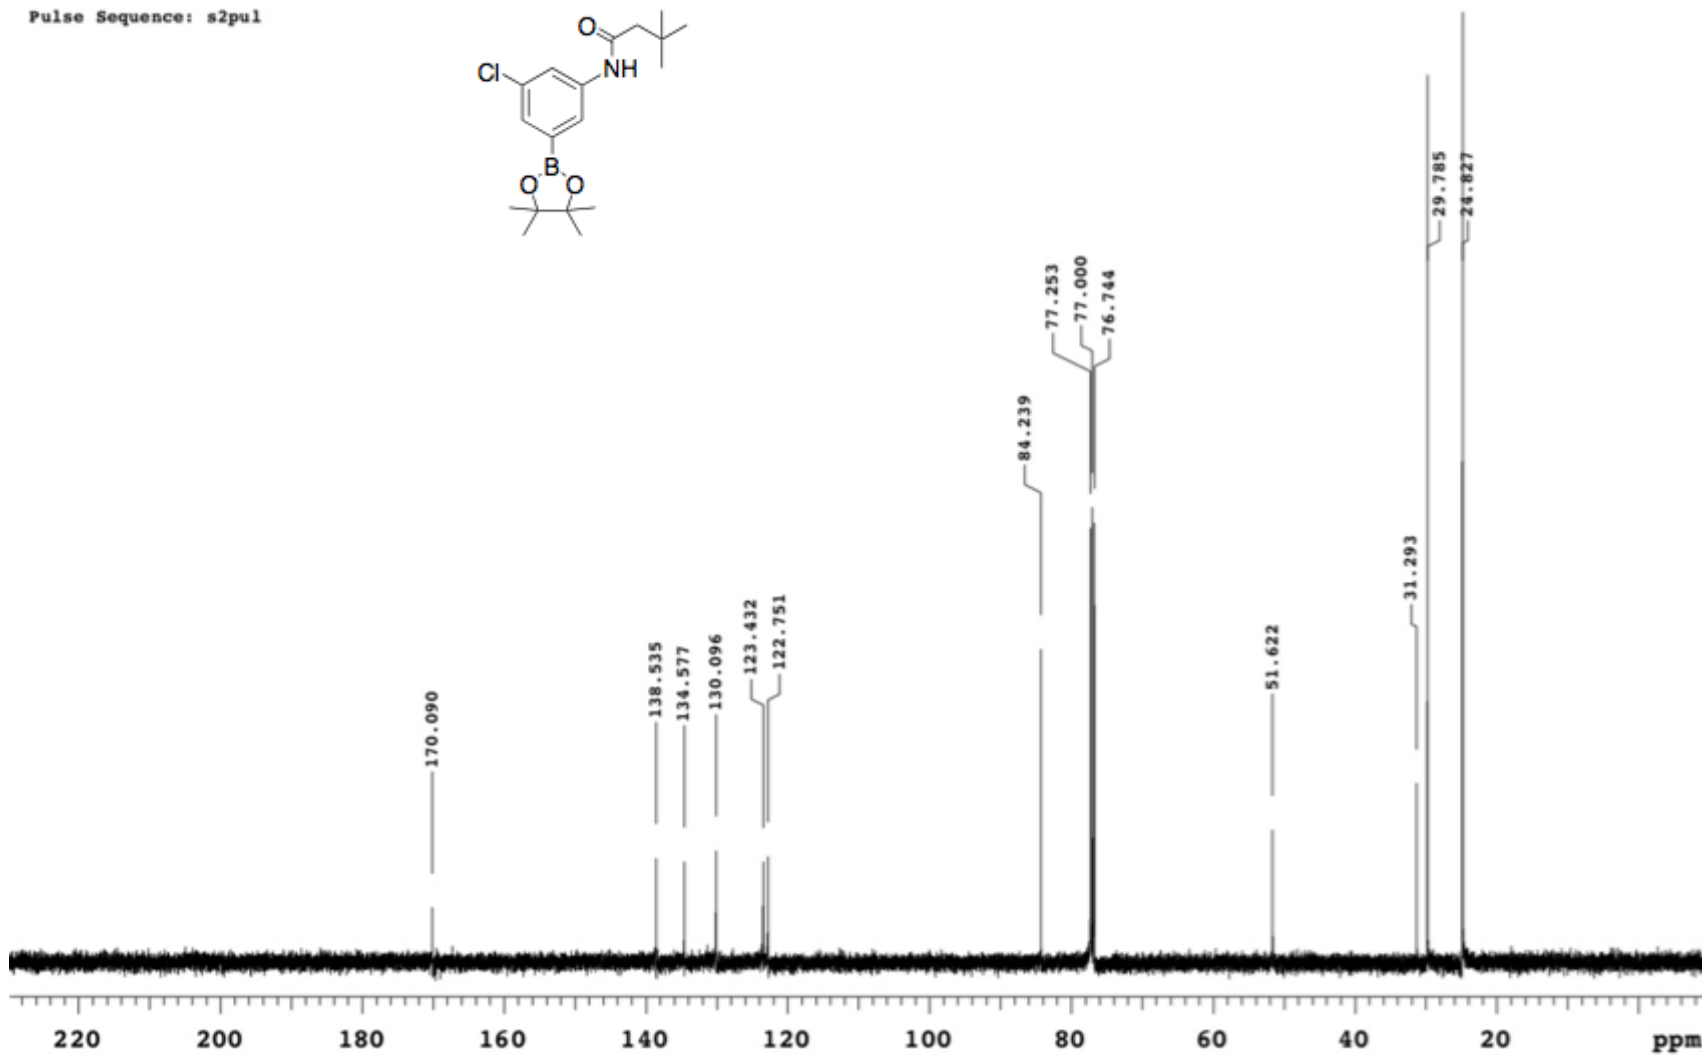

Figure. 126 MHz <sup>13</sup>C NMR spectrum of 13c

500MHz 1H-MTBE-NoD  
kinetic run 13h

Pulse Sequence: s2pul

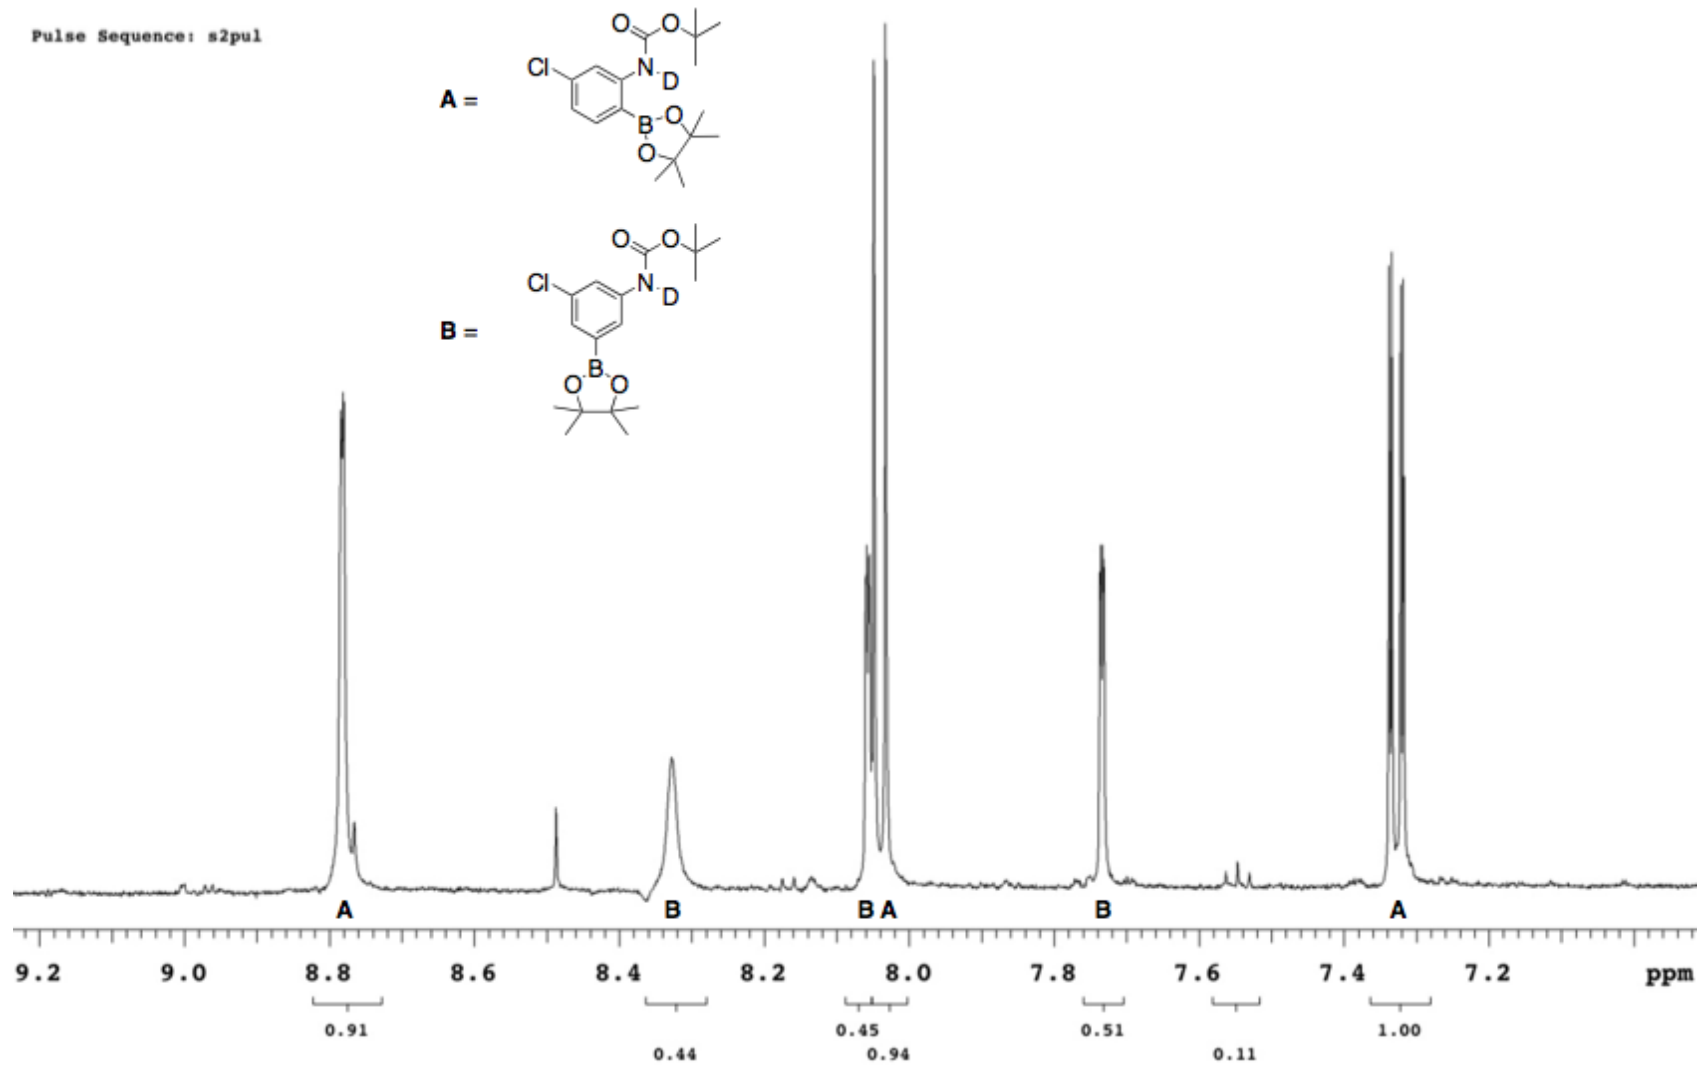

*Figure.* 500 MHz <sup>1</sup>H NMR spectrum of 8a-d<sub>1</sub> / 8b-d<sub>1</sub>

500MHz MTBE 2H  
Kinetic rxn

Archive directory: /home/foster545/vnmrsys/data  
Sample directory:

Pulse Sequence: s2pul

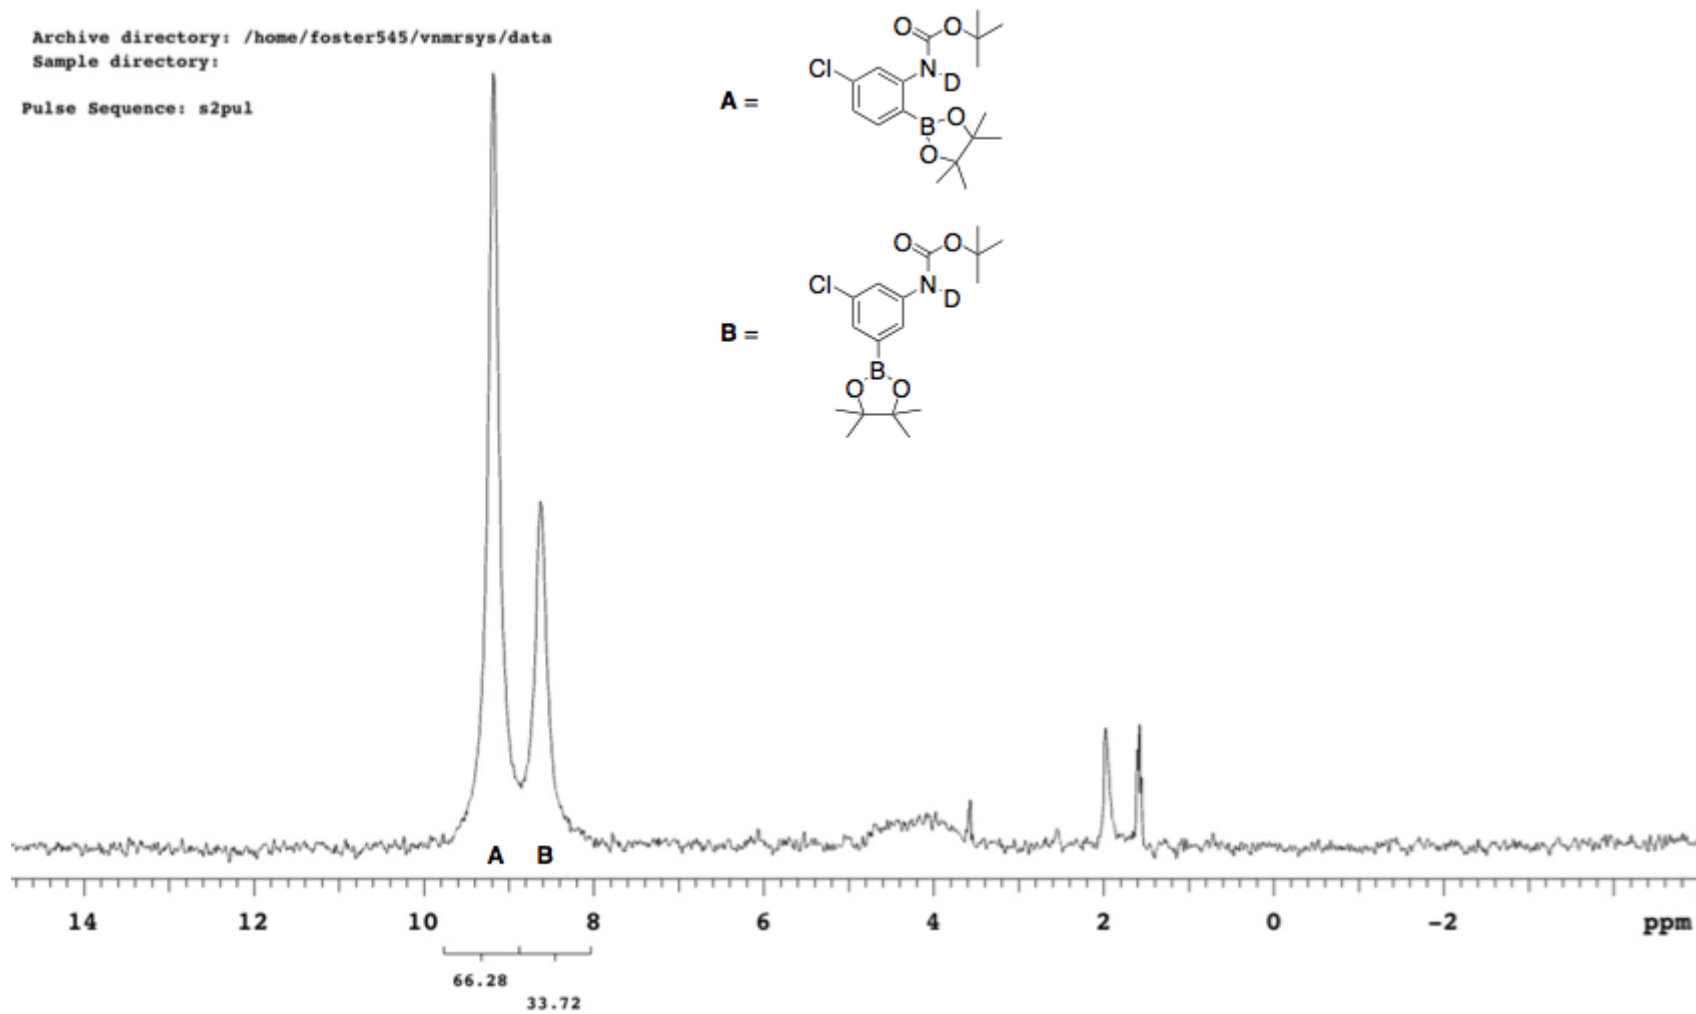

*Figure.* 77 MHz  $^2\text{H}$  NMR spectrum of **8a-d<sub>1</sub>**/**8b-d<sub>1</sub>**

500MHz CDCl3=7.24p 1H  
4-hydroxy-2BPIn-NHBoc-aniline

Pulse Sequence: s2pul

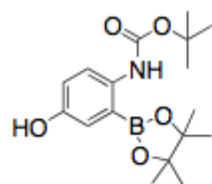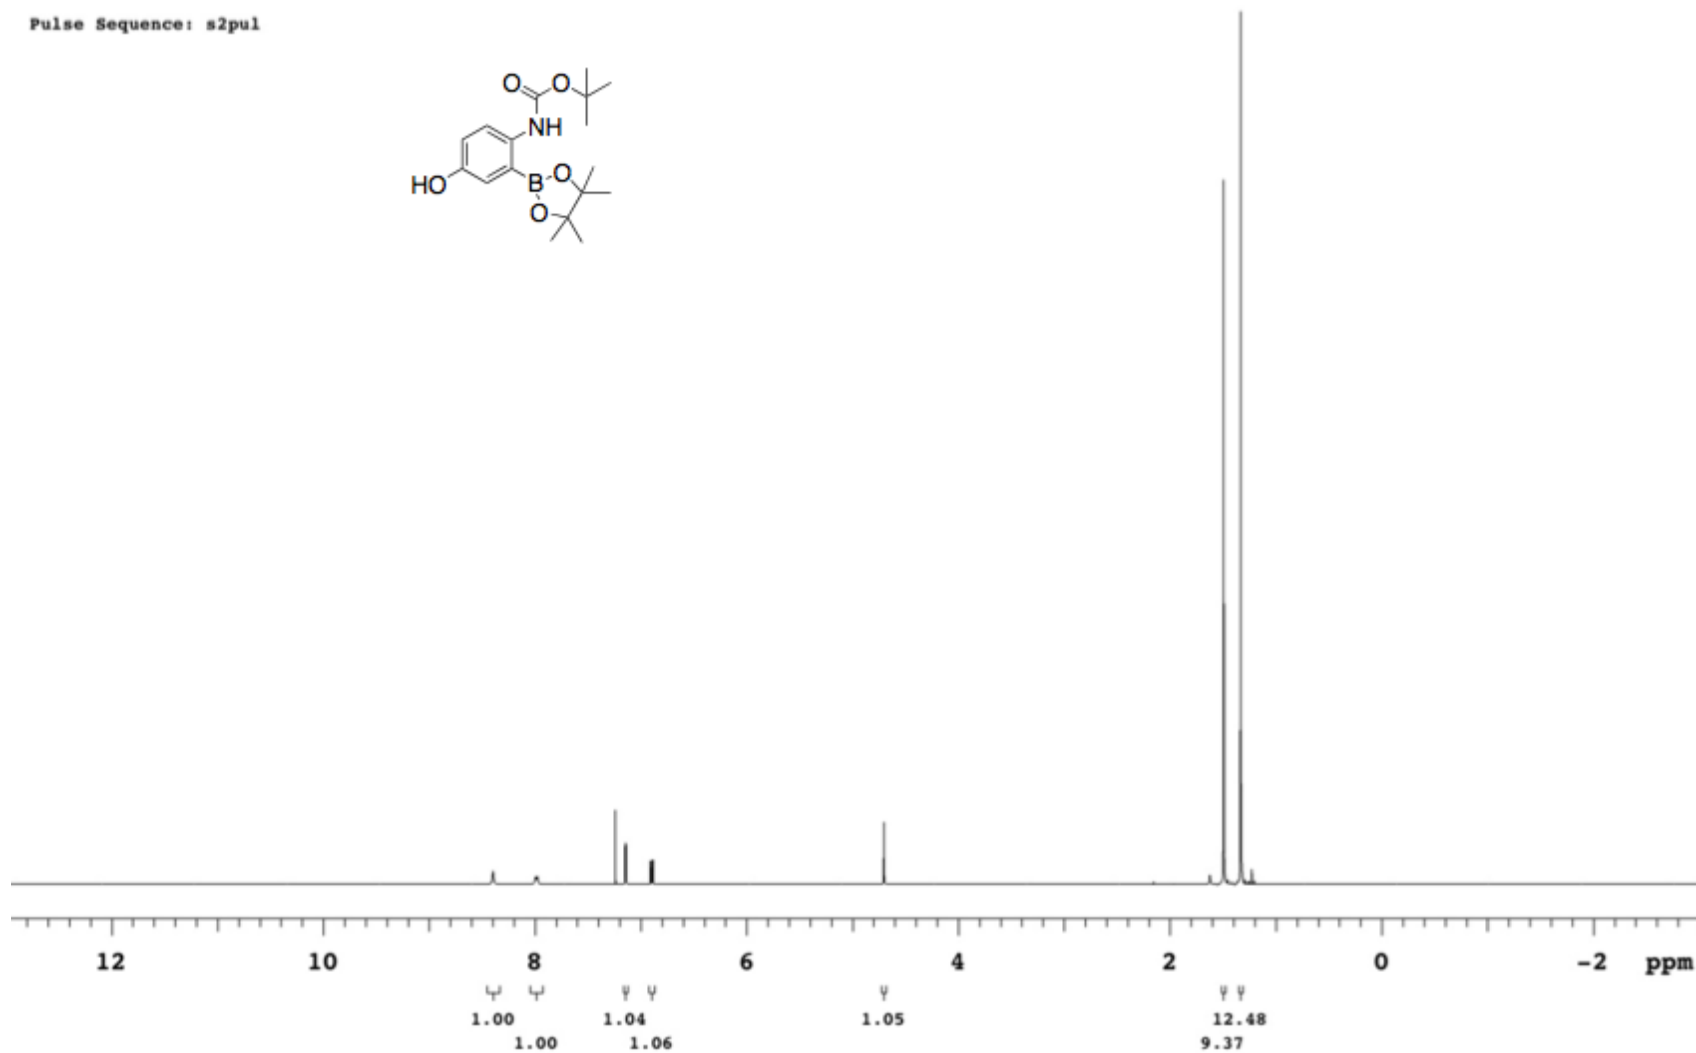

Figure. 500 MHz <sup>1</sup>H NMR spectrum of Table 1, entry 2

126MHz CDCl<sub>3</sub>=77p 13C  
4-hydroxy-2BPIn-NHBoc-aniline

Pulse Sequence: s2pul

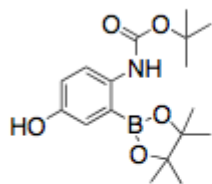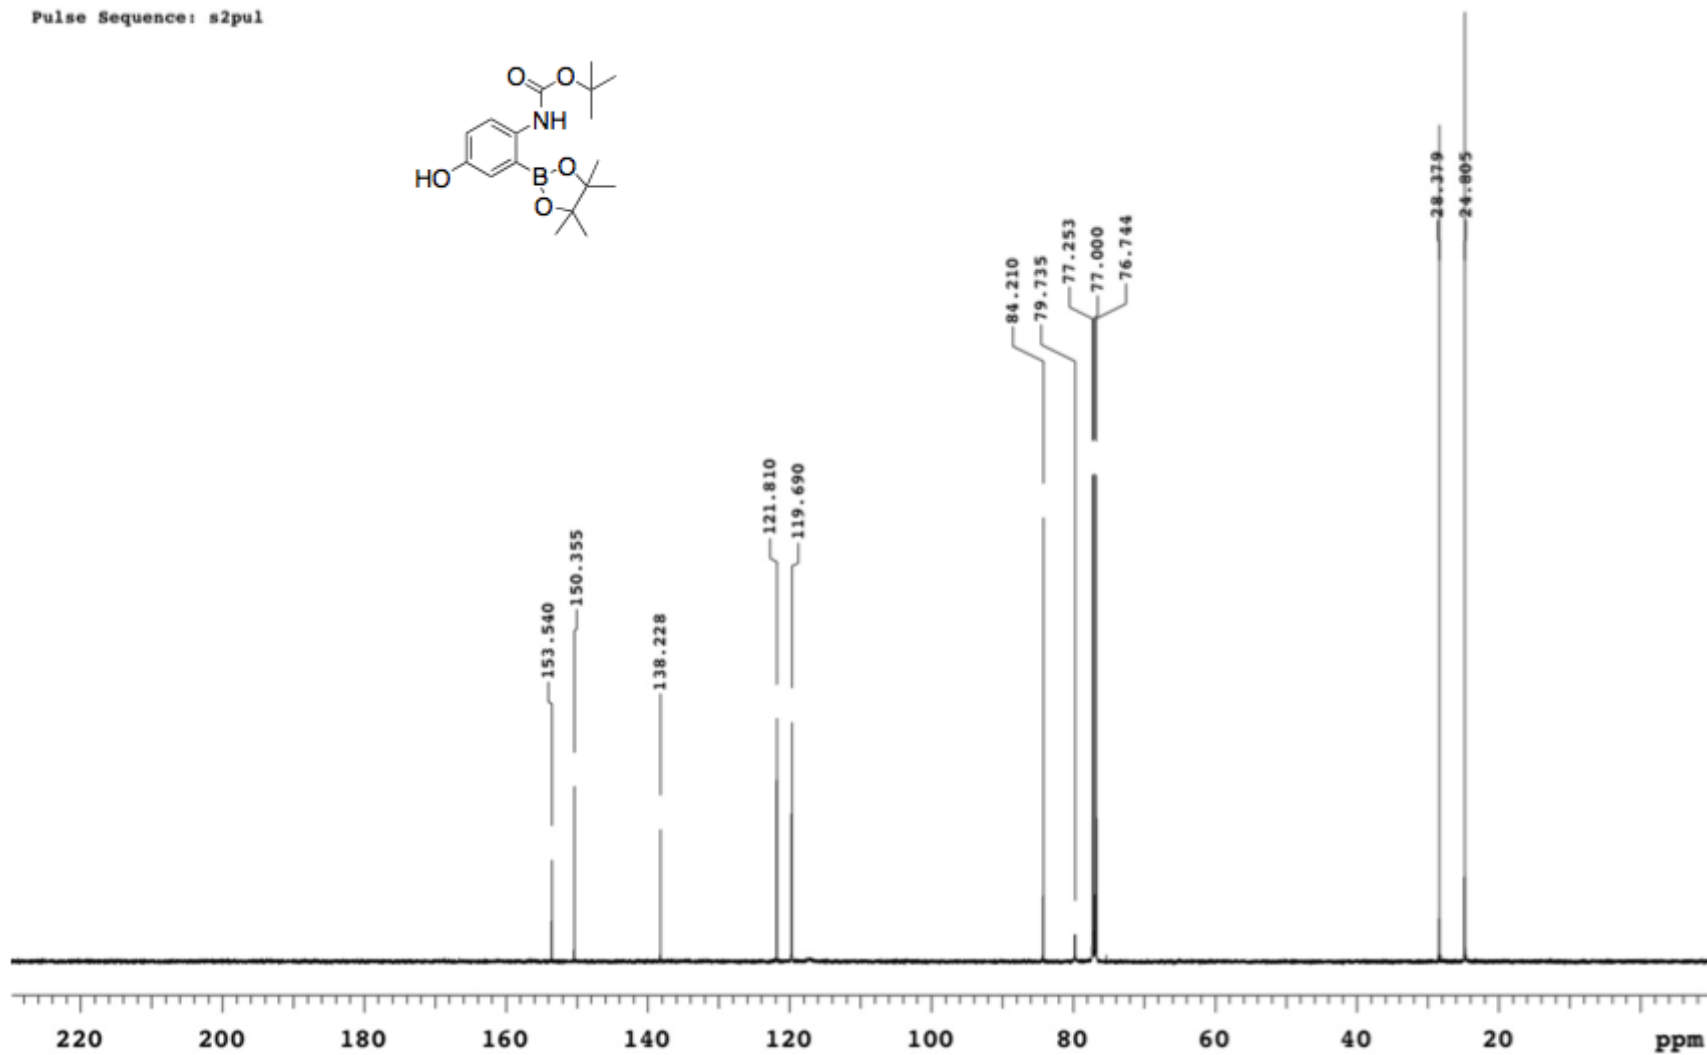

*Figure.* 126 MHz <sup>13</sup>C NMR spectrum of Table 1, entry 2

600MHz CDCl3=7.24p nOe  
nt=256  
N-(Boc)-4-amino-3-BPin-phenol

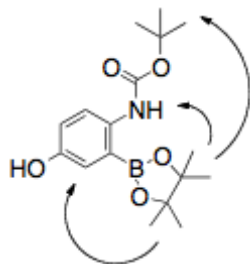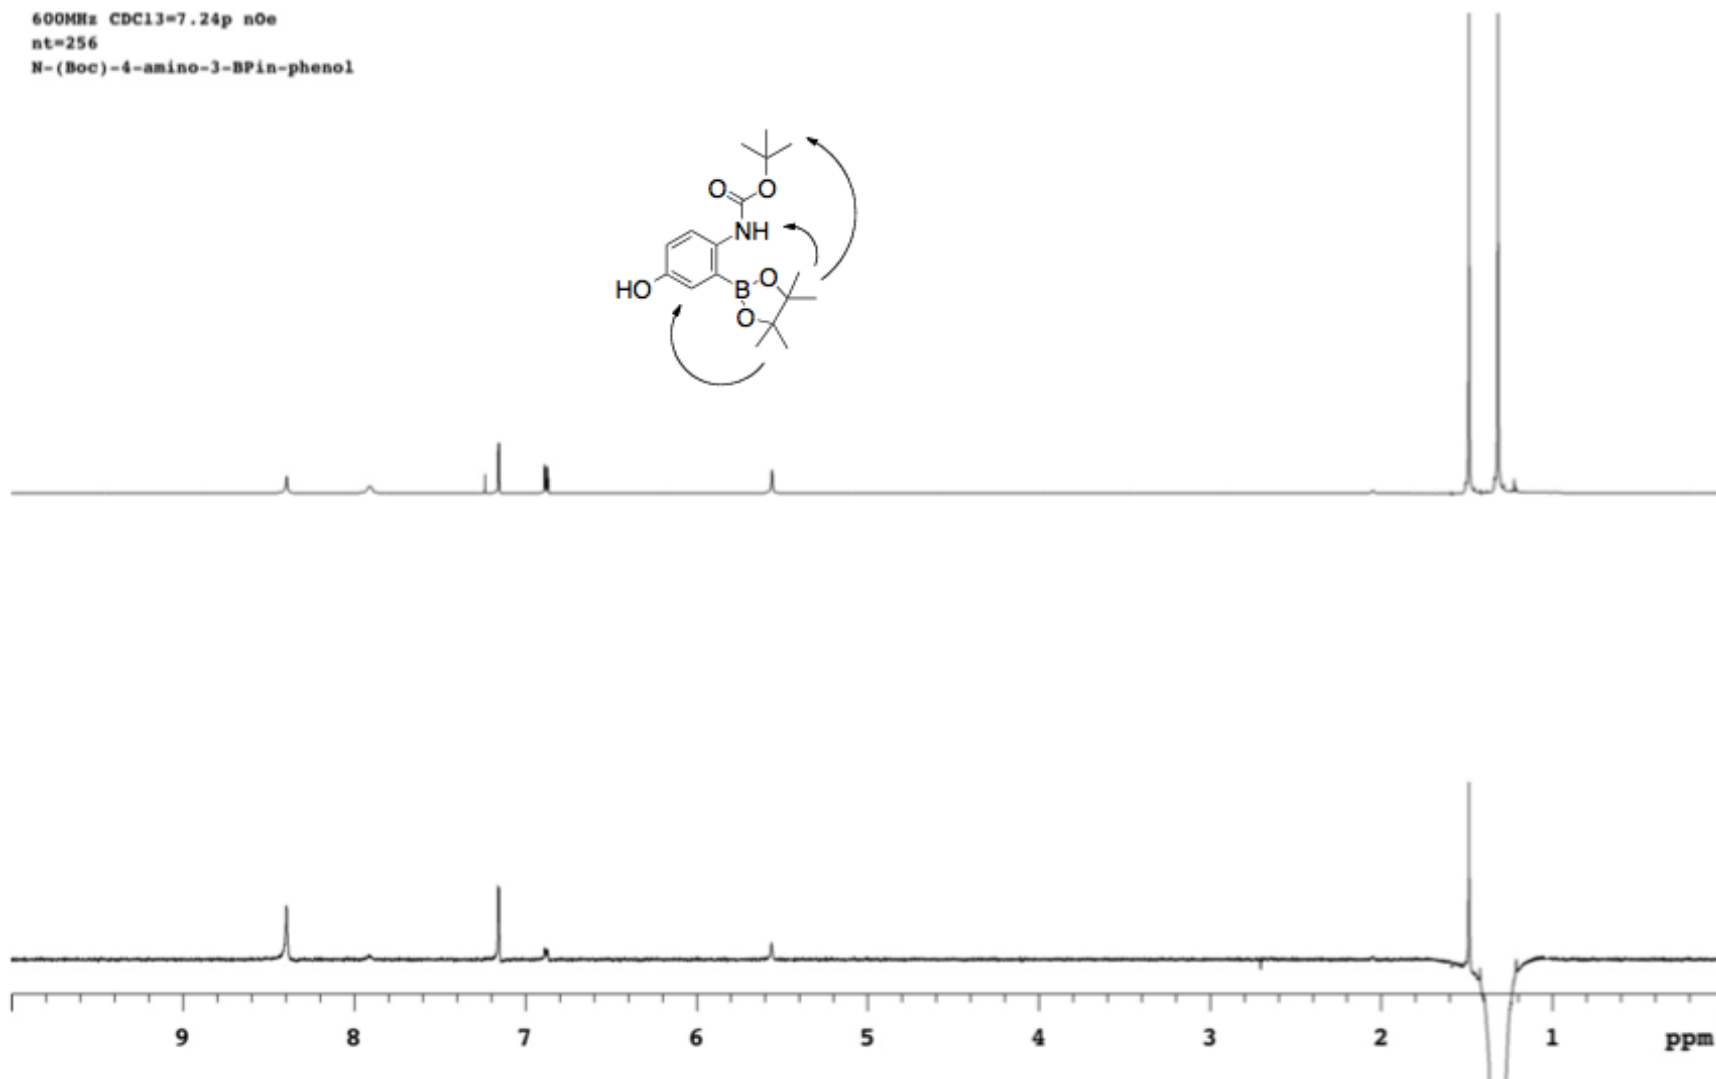

*Figure.* 600 MHz nOe NMR spectrum of **Table 1, entry 2**

500MHz CDCl<sub>3</sub>=7.24p 1H  
4-Cl-2-BPin-NHBoc-aniline

Pulse Sequence: s2pul

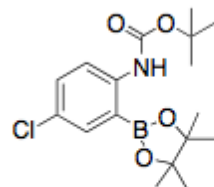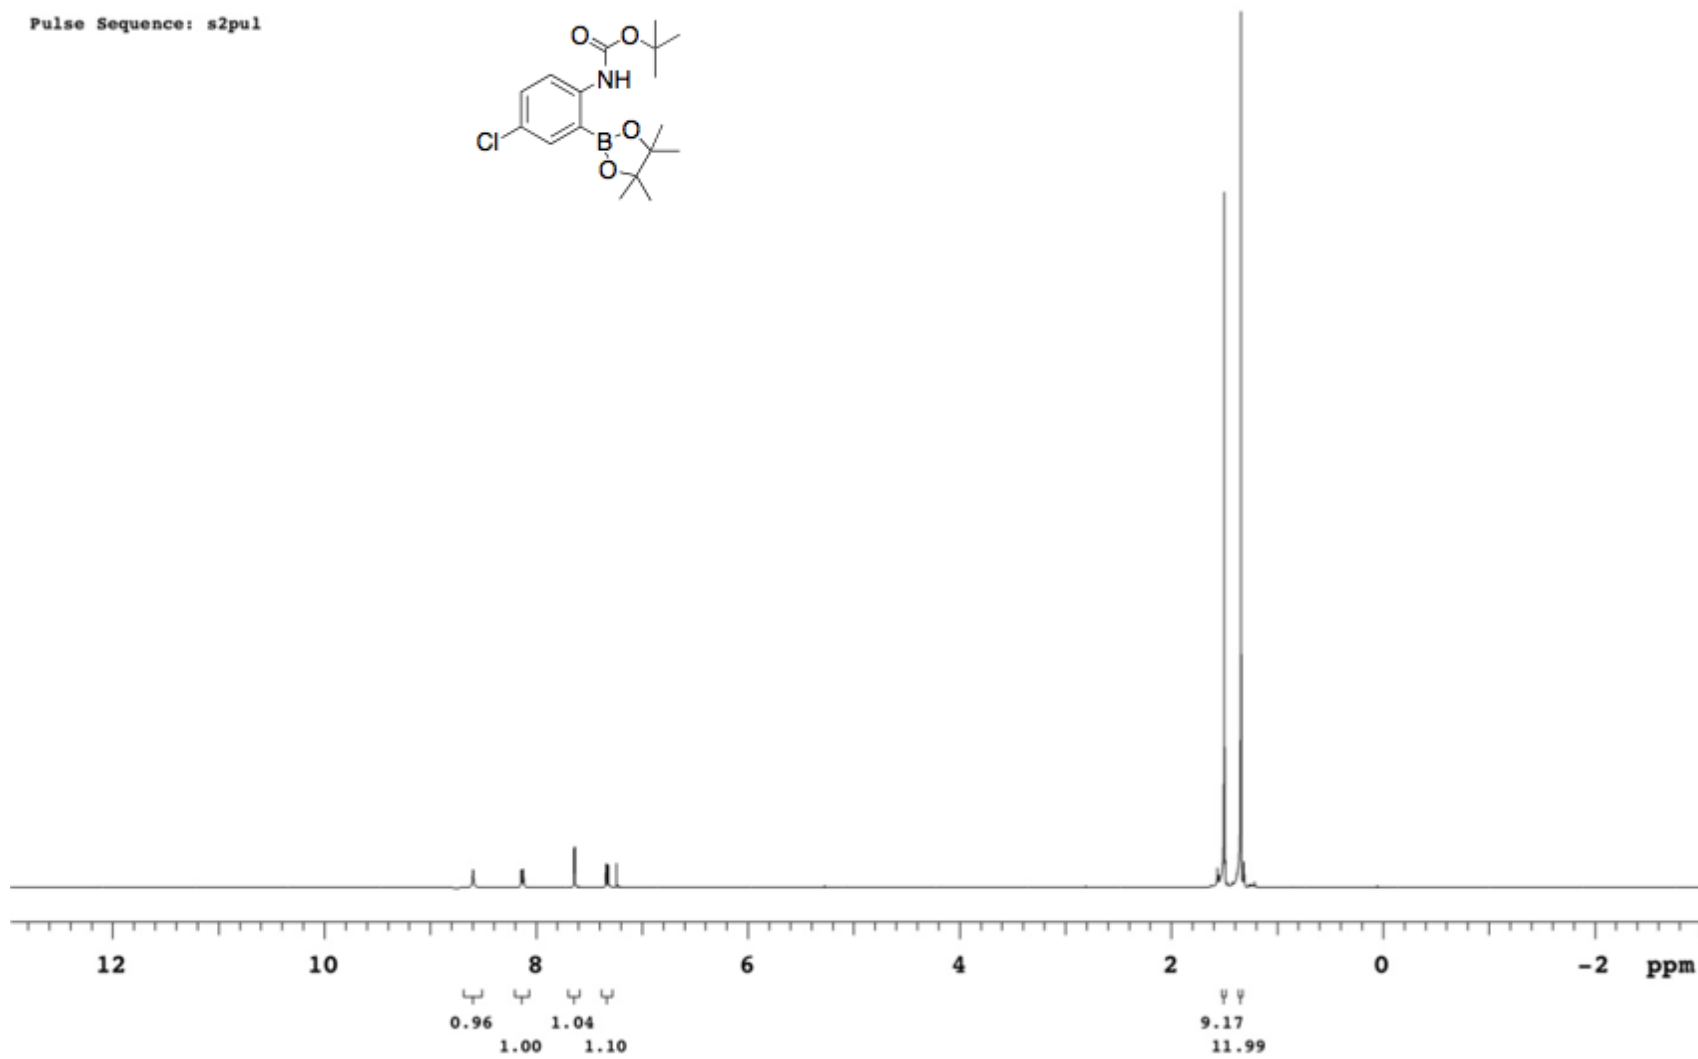

**Figure.** 500 MHz <sup>1</sup>H NMR spectrum of **Table 1, entry 3**

126MHz CDCl<sub>3</sub>=77p 13C  
4-Cl-2-BPin-NHBoc-aniline

Pulse Sequence: s2pul

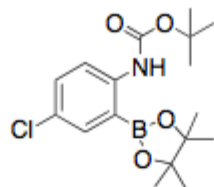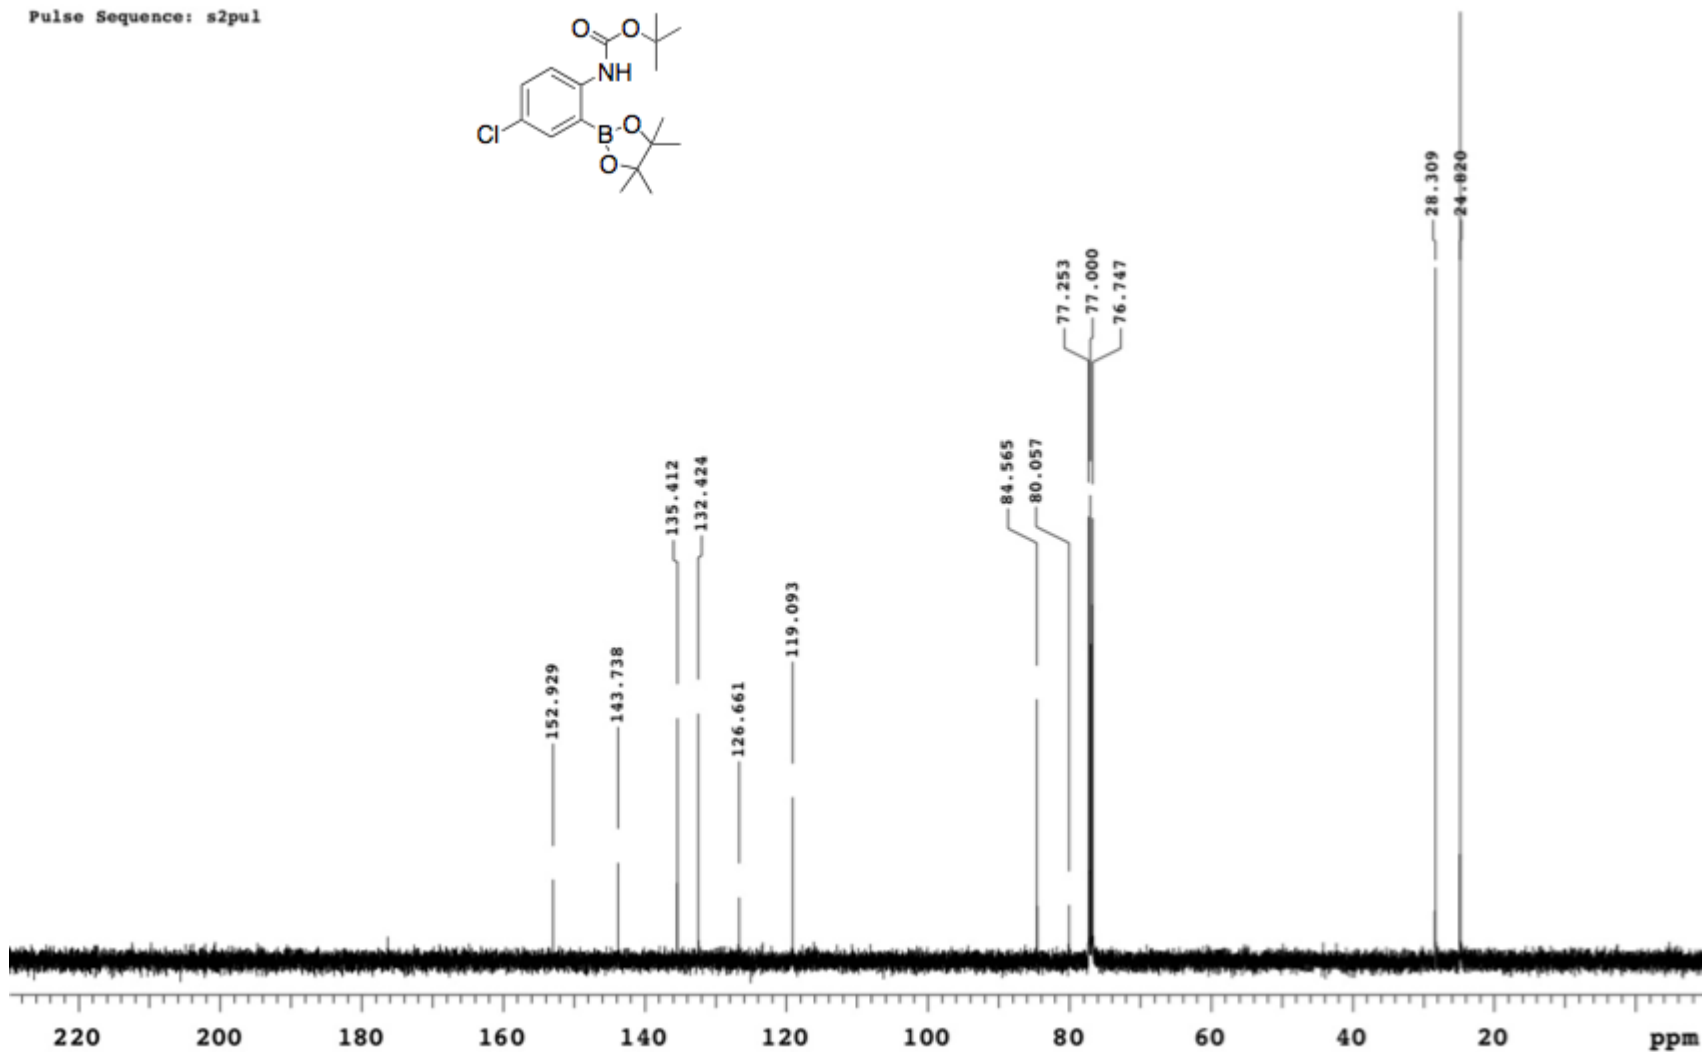

*Figure.* 126 MHz <sup>13</sup>C NMR spectrum of Table 1, entry 3



500MHz CDCl3=7.24p nOe  
nt=32  
N-(Boc)-4-chloro-2-BPin-aniline

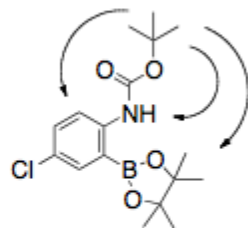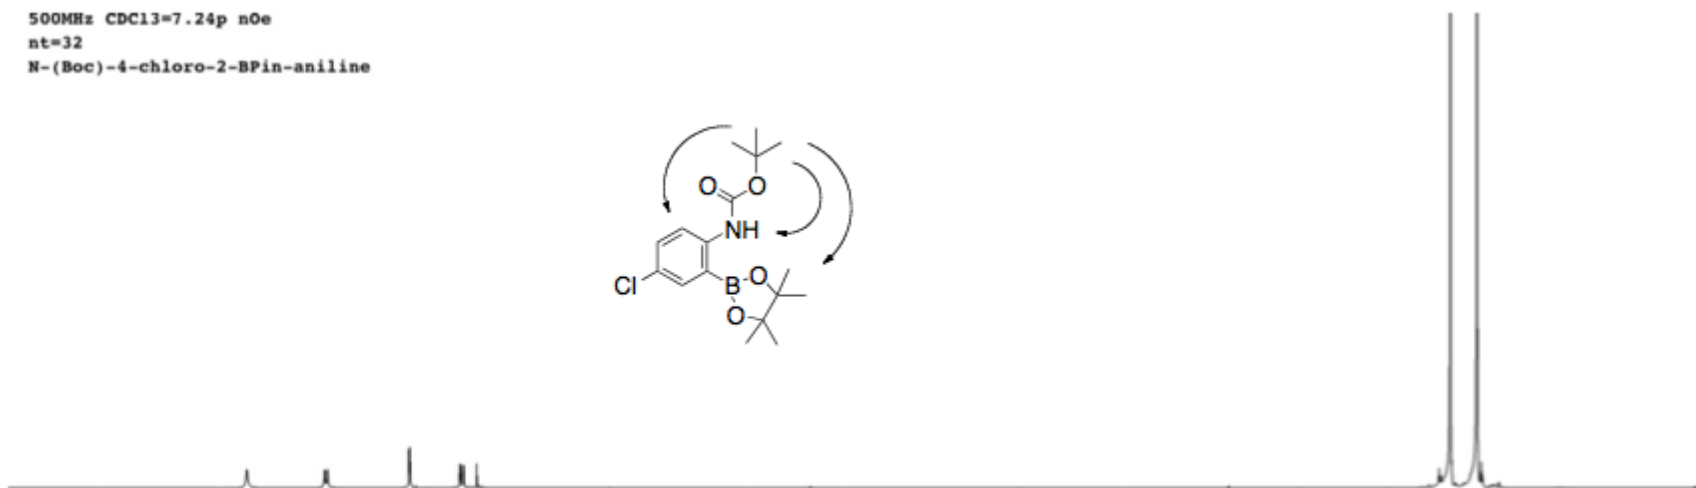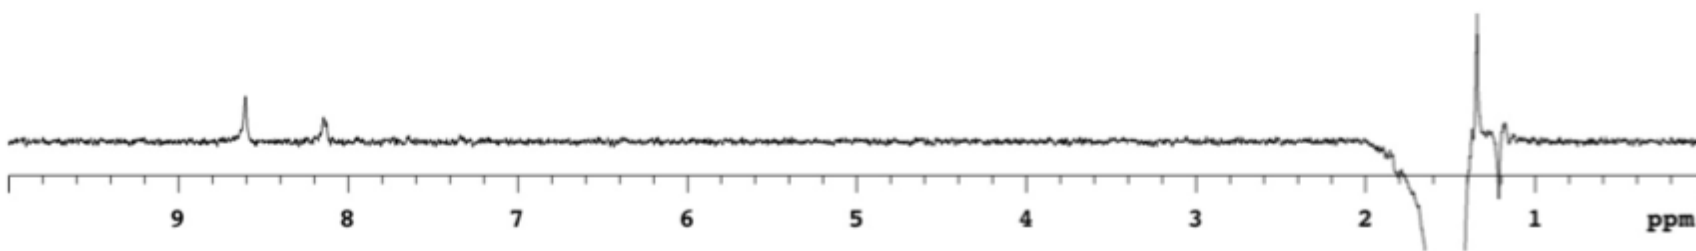

*Figure.* 500 MHz nOe NMR spectrum of **Table 1, entry 3**

500MHz CDCl3=7.24p nOe  
nt=32  
N-(Boc)-4-chloro-2-BPin-aniline

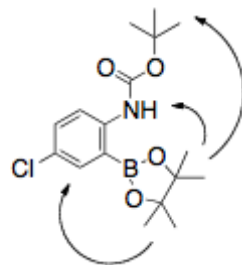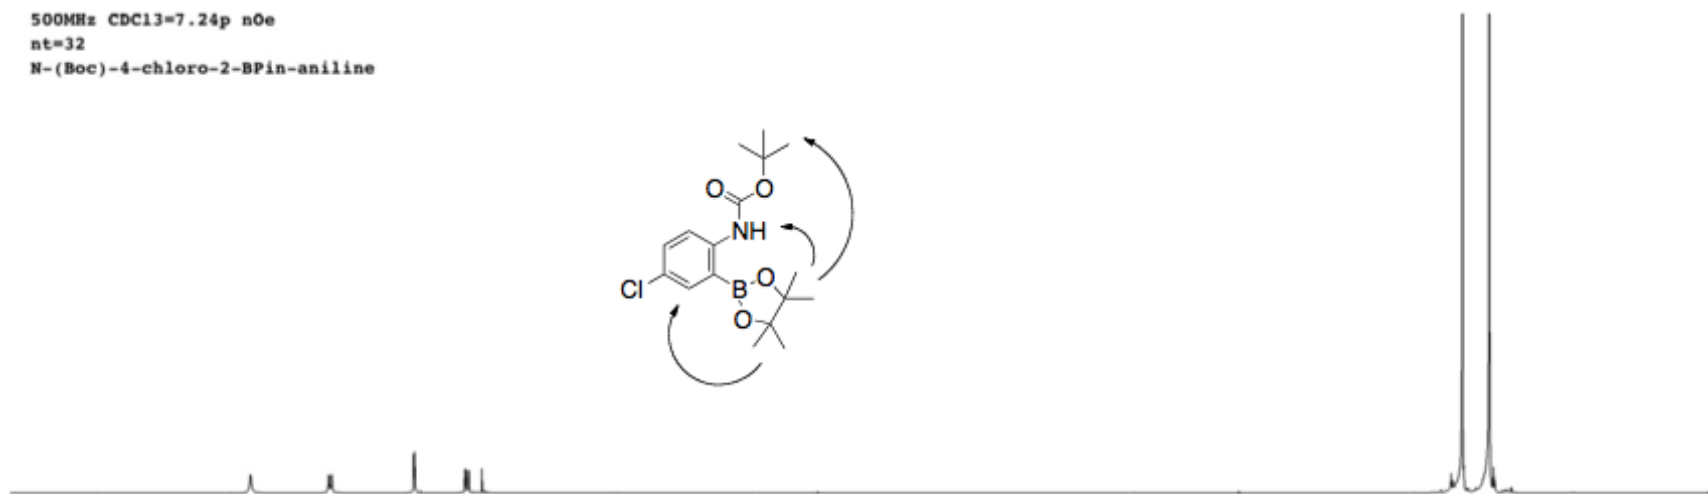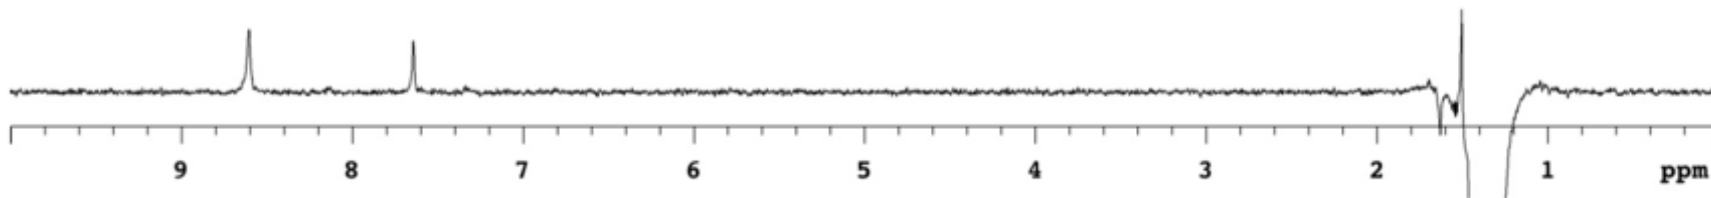

*Figure.* 500 MHz nOe NMR spectrum of **Table 1, entry 3**

500MHz CDCl<sub>3</sub>=7.24p 1H  
4-Br-2-BPin-NHBoc-aniline

Pulse Sequence: s2pul

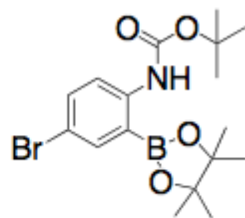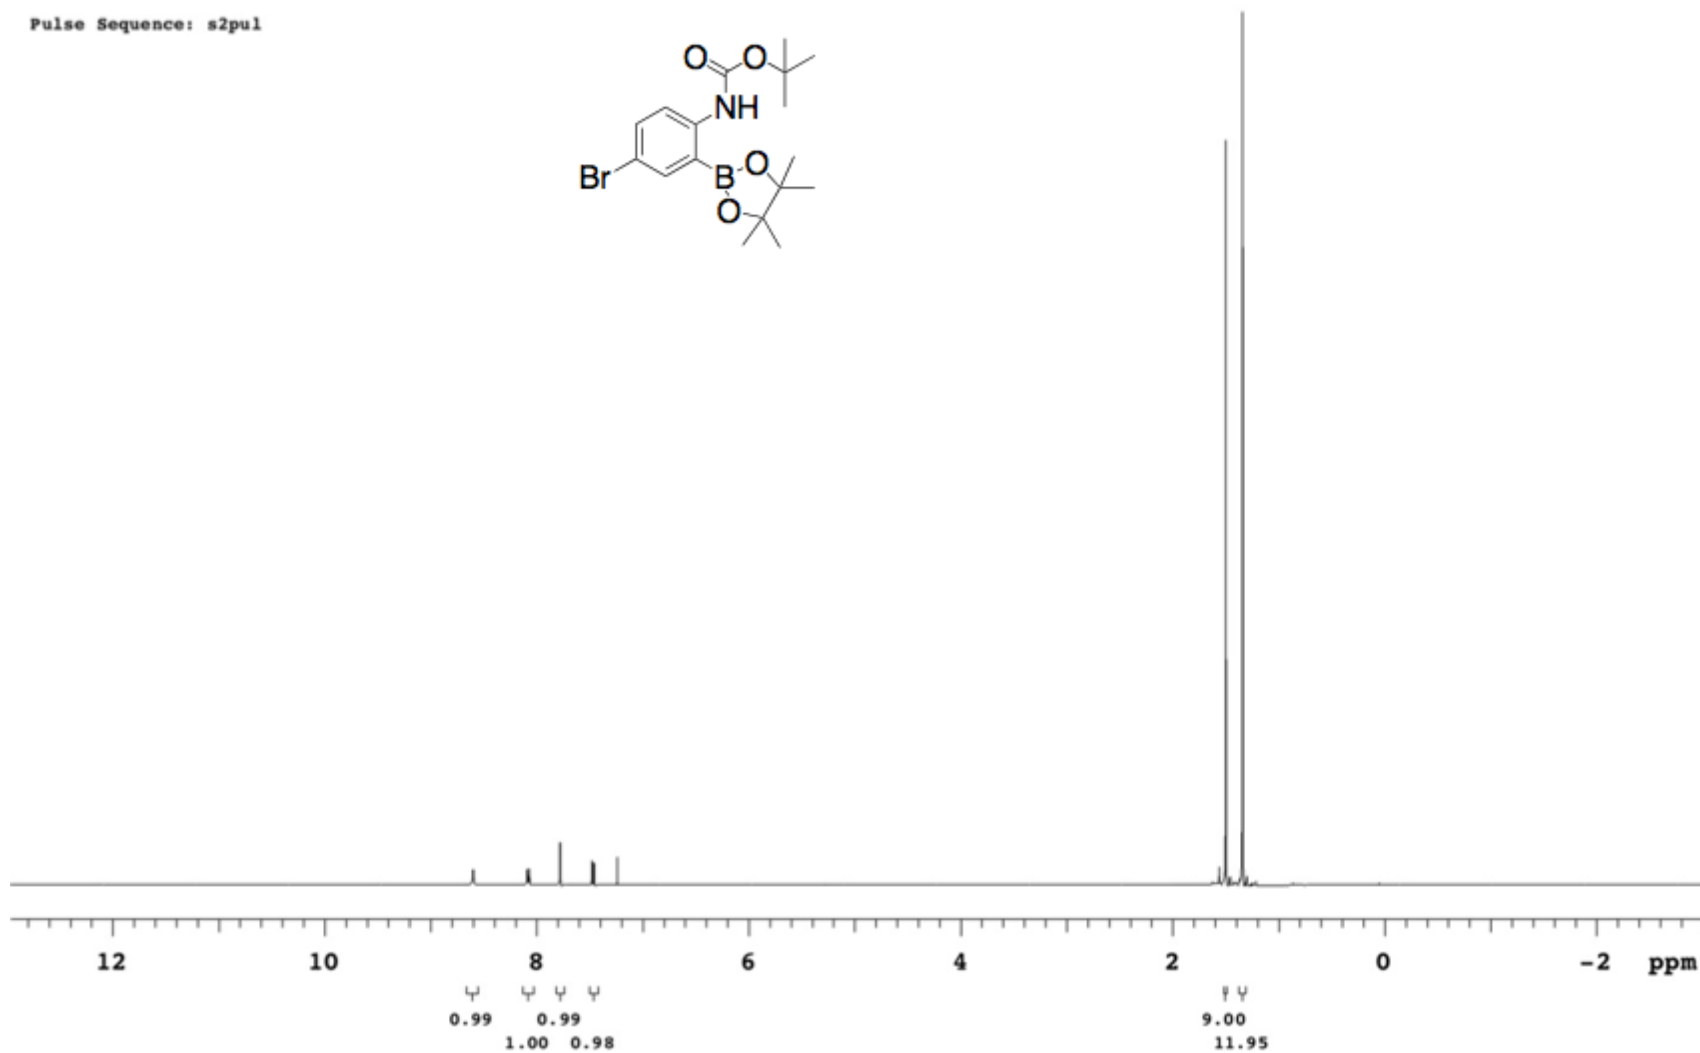

*Figure.* 500 MHz <sup>1</sup>H NMR spectrum of Table 1, entry 4

126MHz CDCl3=77p 13C  
4-Br-2-BPin-NHBoc-aniline

Pulse Sequence: s2pul

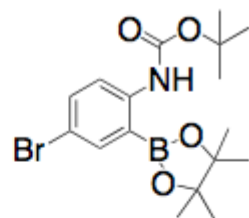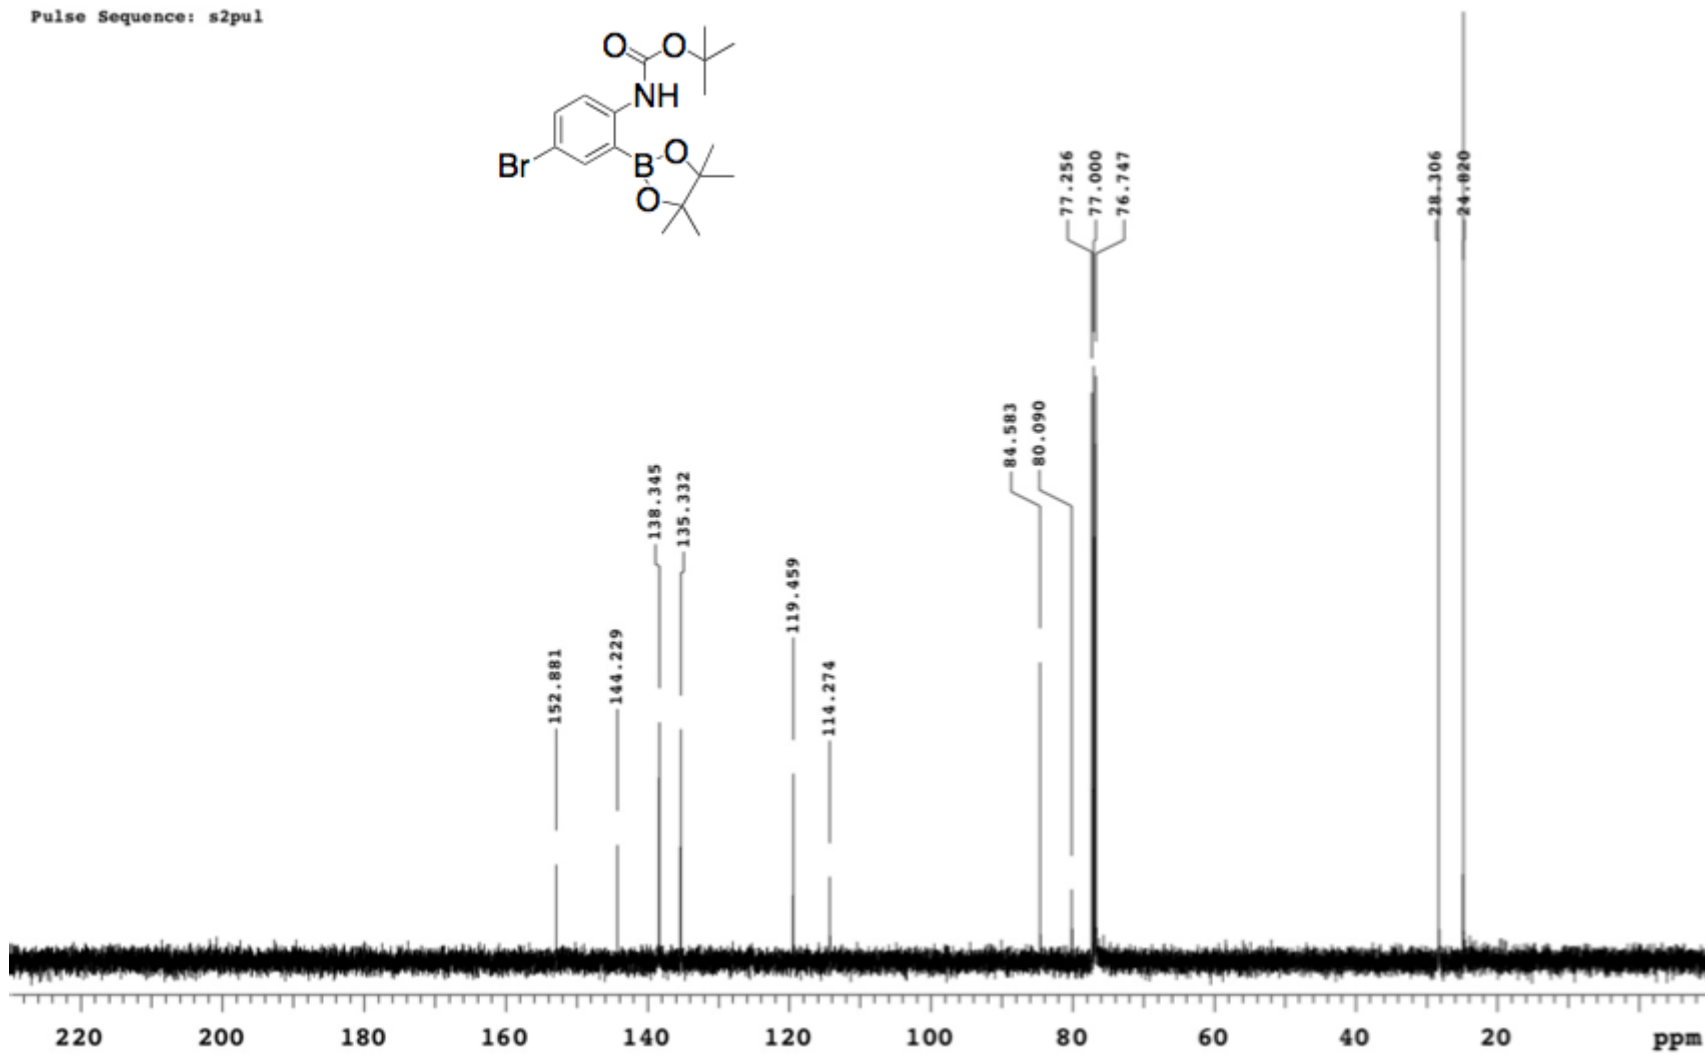

*Figure.* 126 MHz  $^{13}\text{C}$  NMR spectrum of Table 1, entry 4

500MHz CDCl3=7.24p nOe  
nt=32  
N-(Boc)-4-bromo-2-BPin-aniline

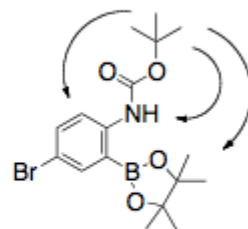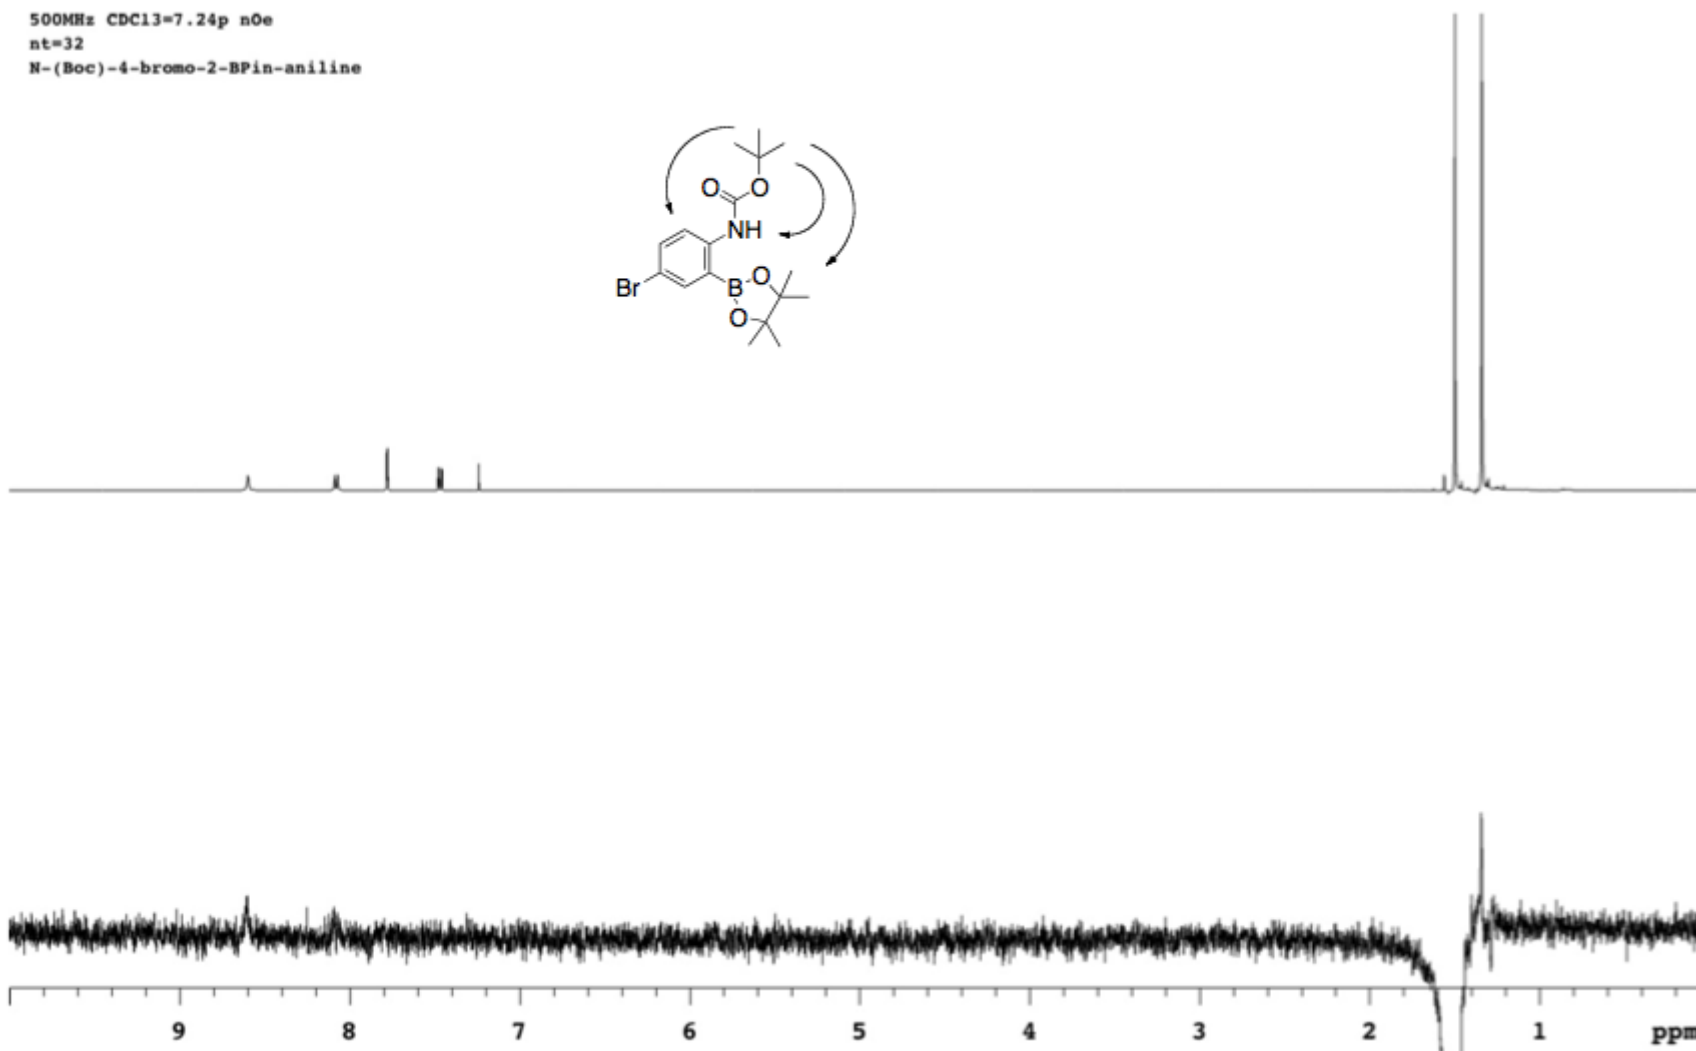

*Figure.* 500 MHz nOe NMR spectrum of **Table 1, entry 4**

500MHz CDCl3=7.24p nOe  
nt=32  
N-(Boc)-4-bromo-2-BPin-aniline

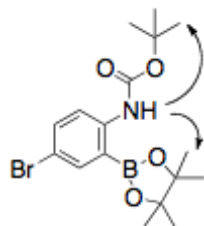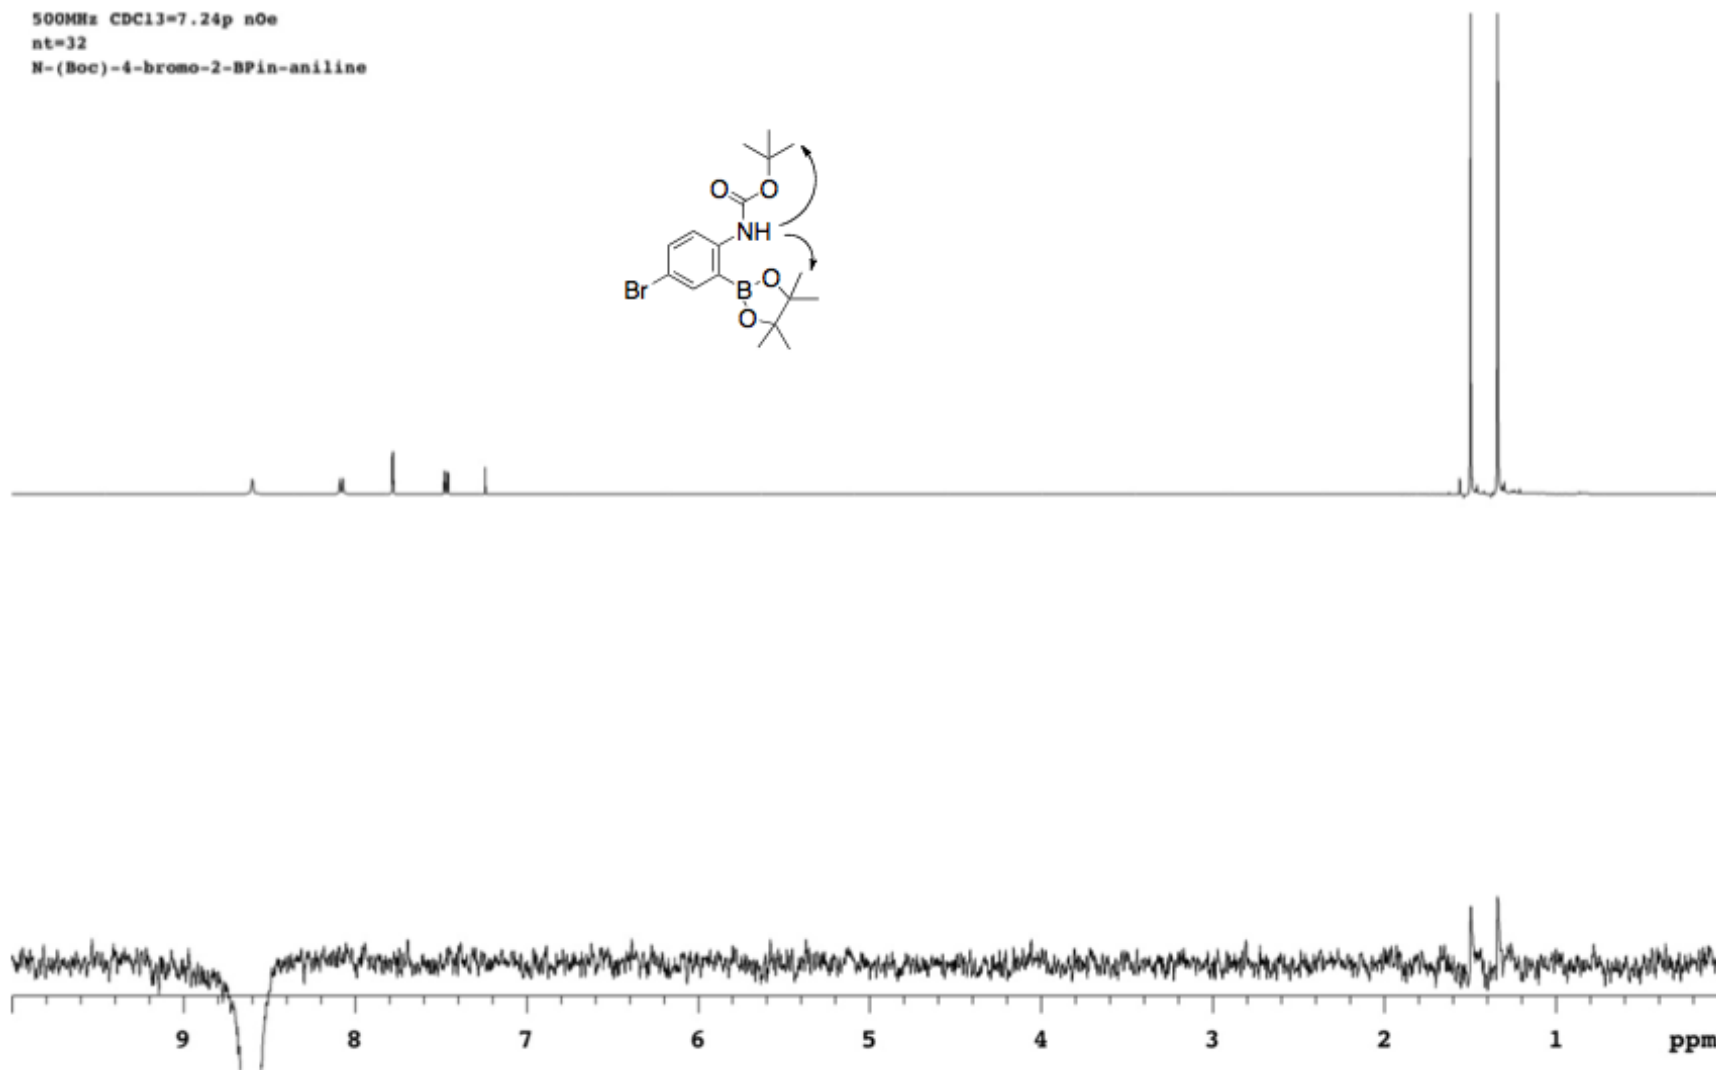

*Figure.* 500 MHz nOe NMR spectrum of **Table 1, entry 4**

500MHz CDCl3=7.24p 1H  
4-Cl-5-F-N-Boc-2-BPin-aniline

Pulse Sequence: s2pul

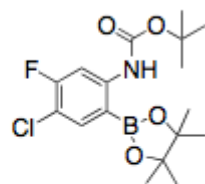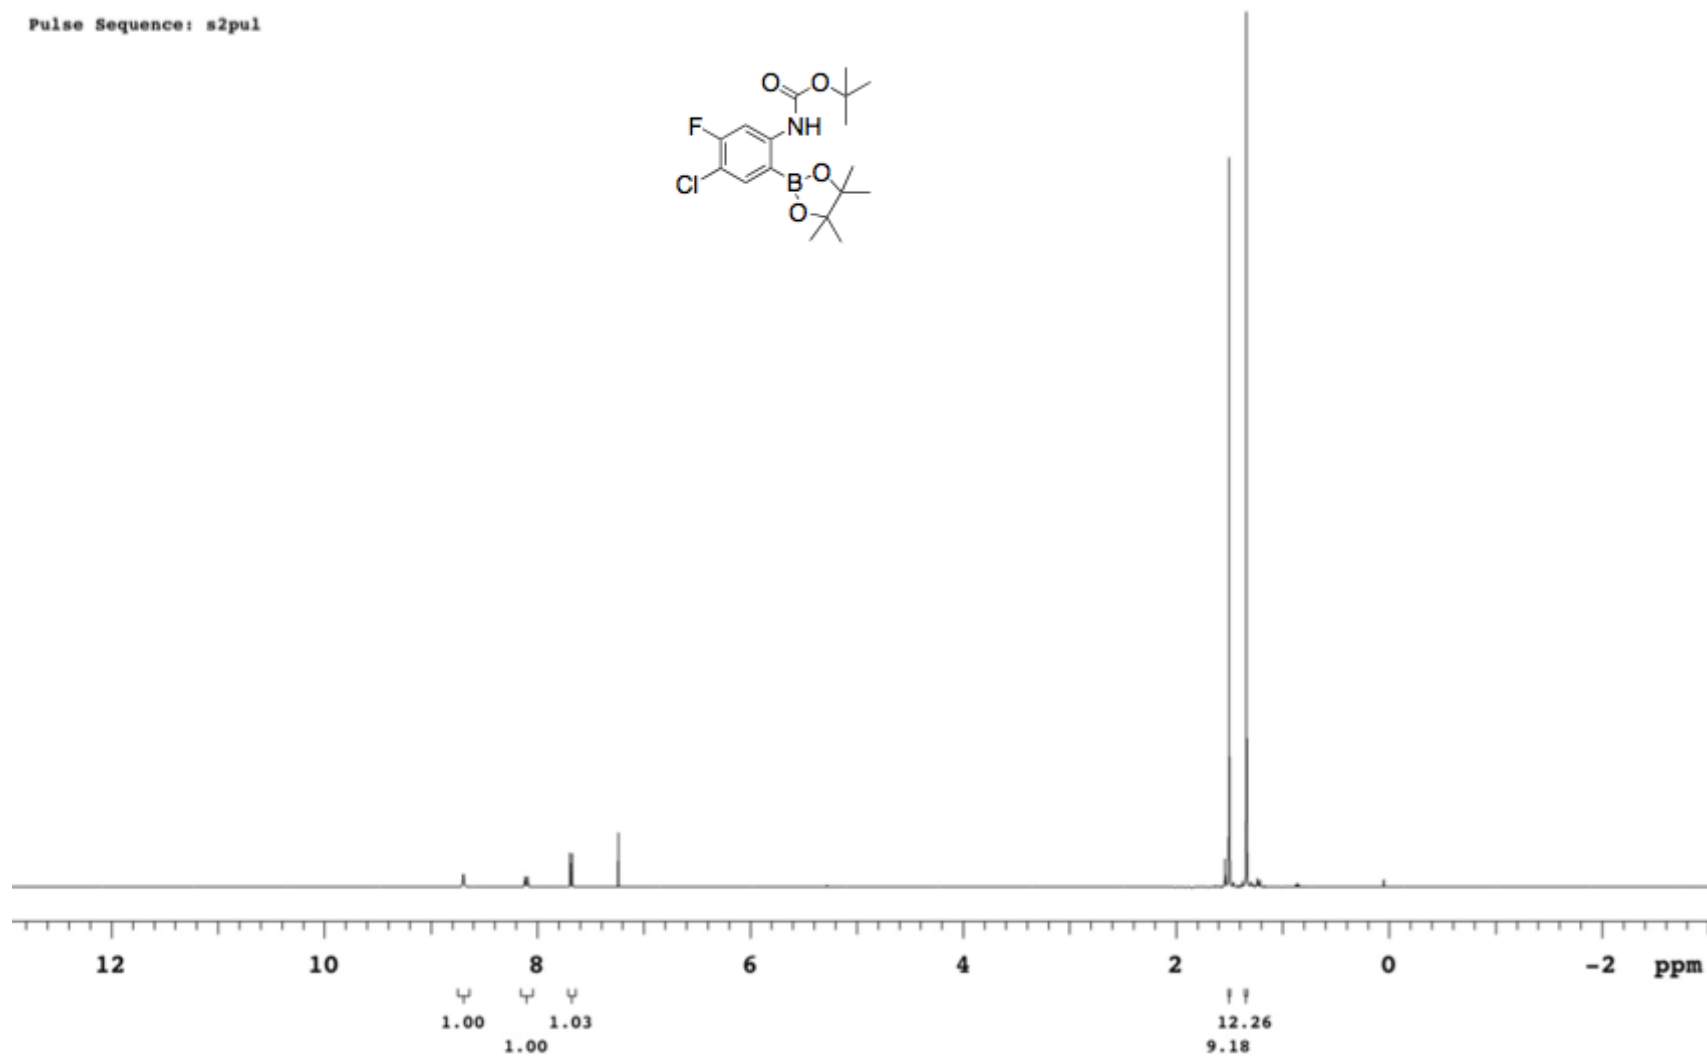

*Figure.* 500 MHz <sup>1</sup>H NMR spectrum of Table 1, entry 5

126MHz CDCl3=77p 13C  
N-Boc-4-Cl-5-F-2-BPin-aniline

Pulse Sequence: s2pul

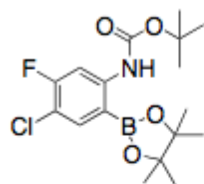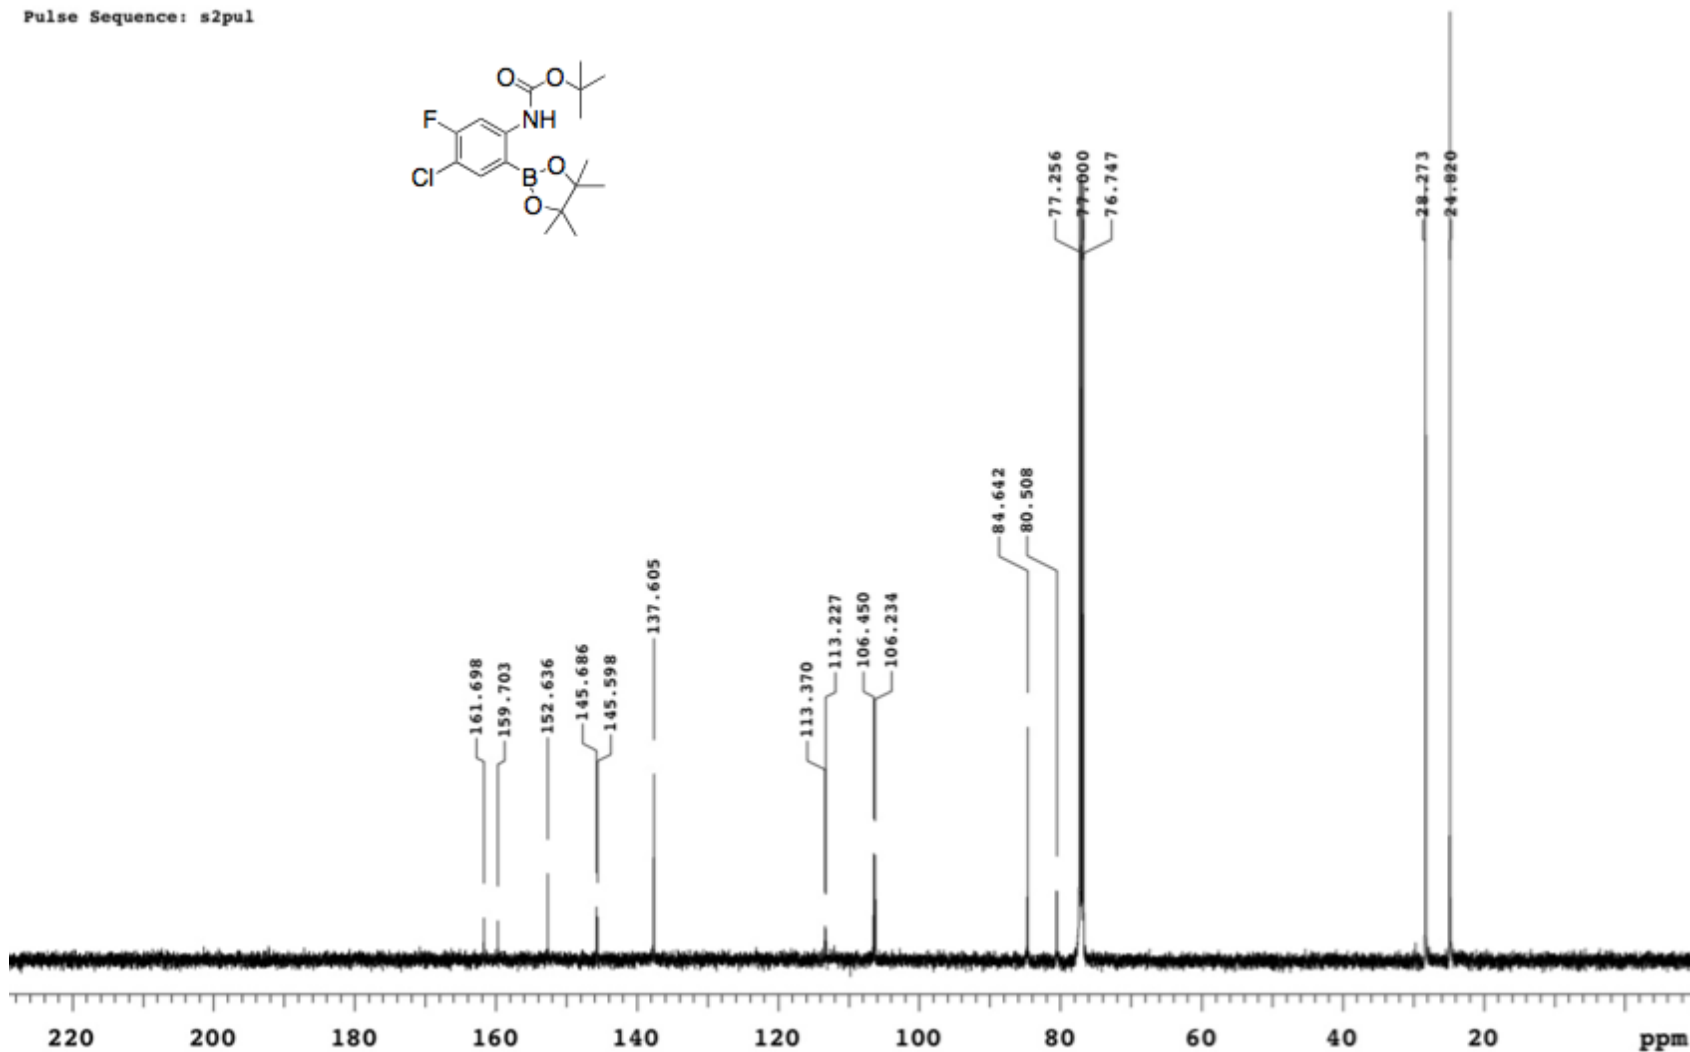

Figure. 126 MHz  $^{13}\text{C}$  NMR spectrum of Table 1, entry 5



500MHz CDCl3=7.24p nOe  
nt=64  
N-(Boc)-4-chloro-5-fluoro-2-BPin-aniline

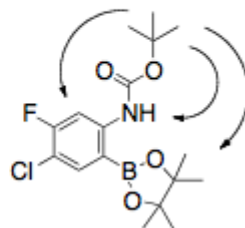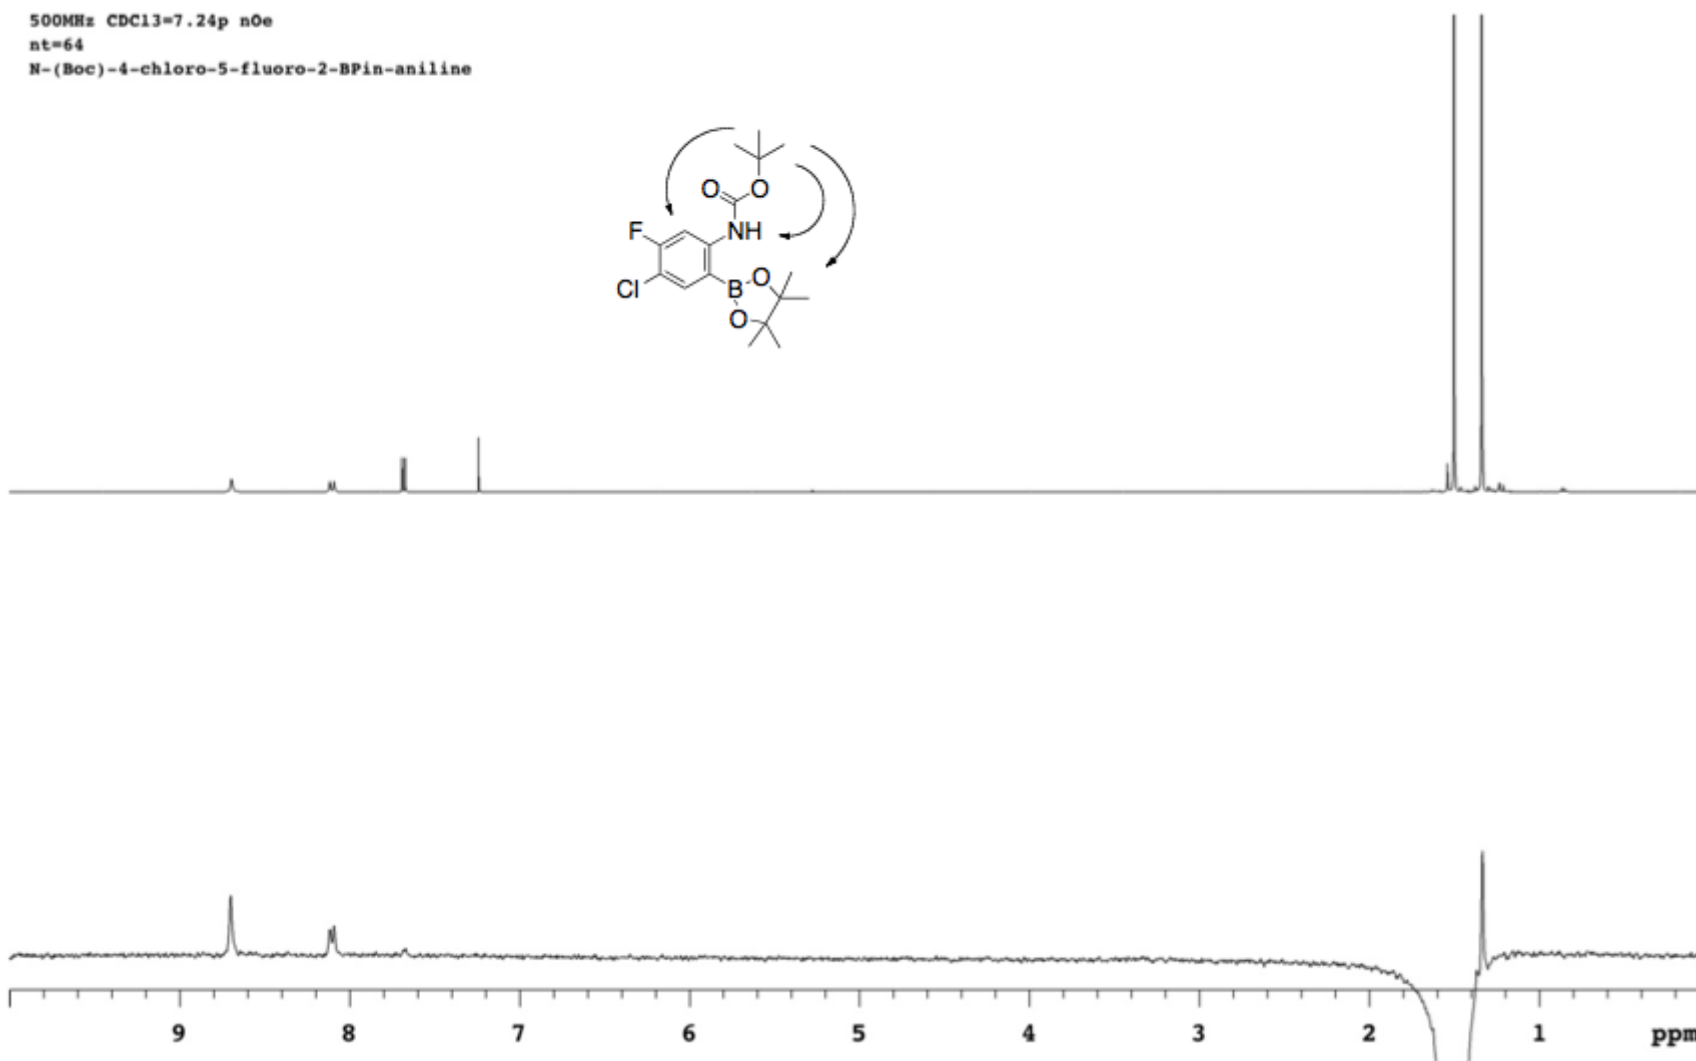

*Figure.* 500 MHz nOe NMR spectrum of **Table 1, entry 5**

500MHz CDCl3=7.24p nOe  
nt=64  
N-(Boc)-4-chloro-5-fluoro-2-BPin-aniline

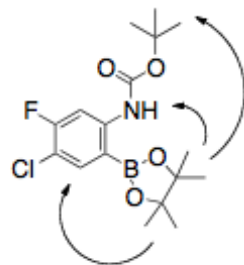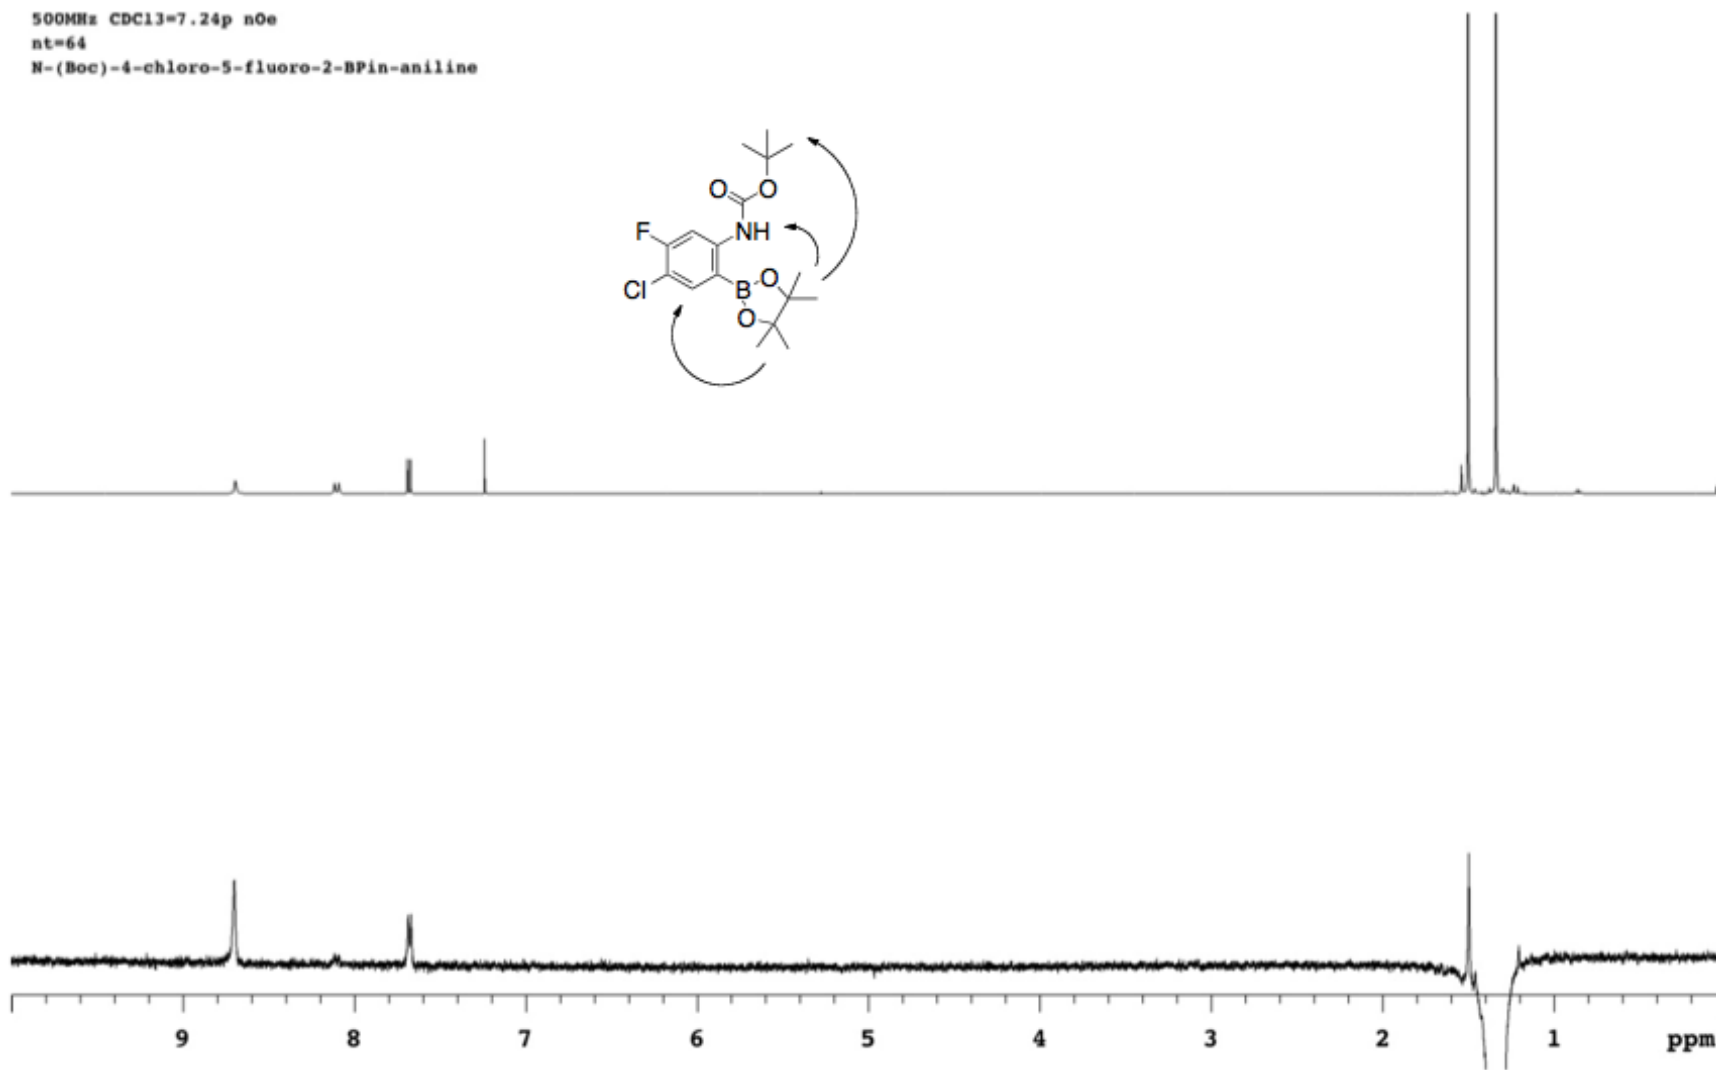

*Figure.* 500 MHz nOe NMR spectrum of **Table 1, entry 5**

600MHz CDCl<sub>3</sub>=7.24p 1H  
N-Boc-2-BPin-4-fluoro-5-methylaniline and  
N-Boc-3-BPin-4-fluoro-5-methylaniline

Pulse Sequence: s2pul

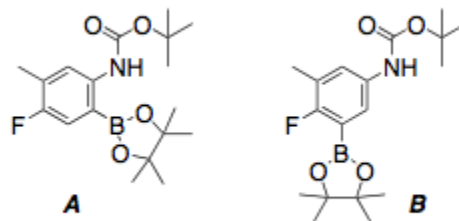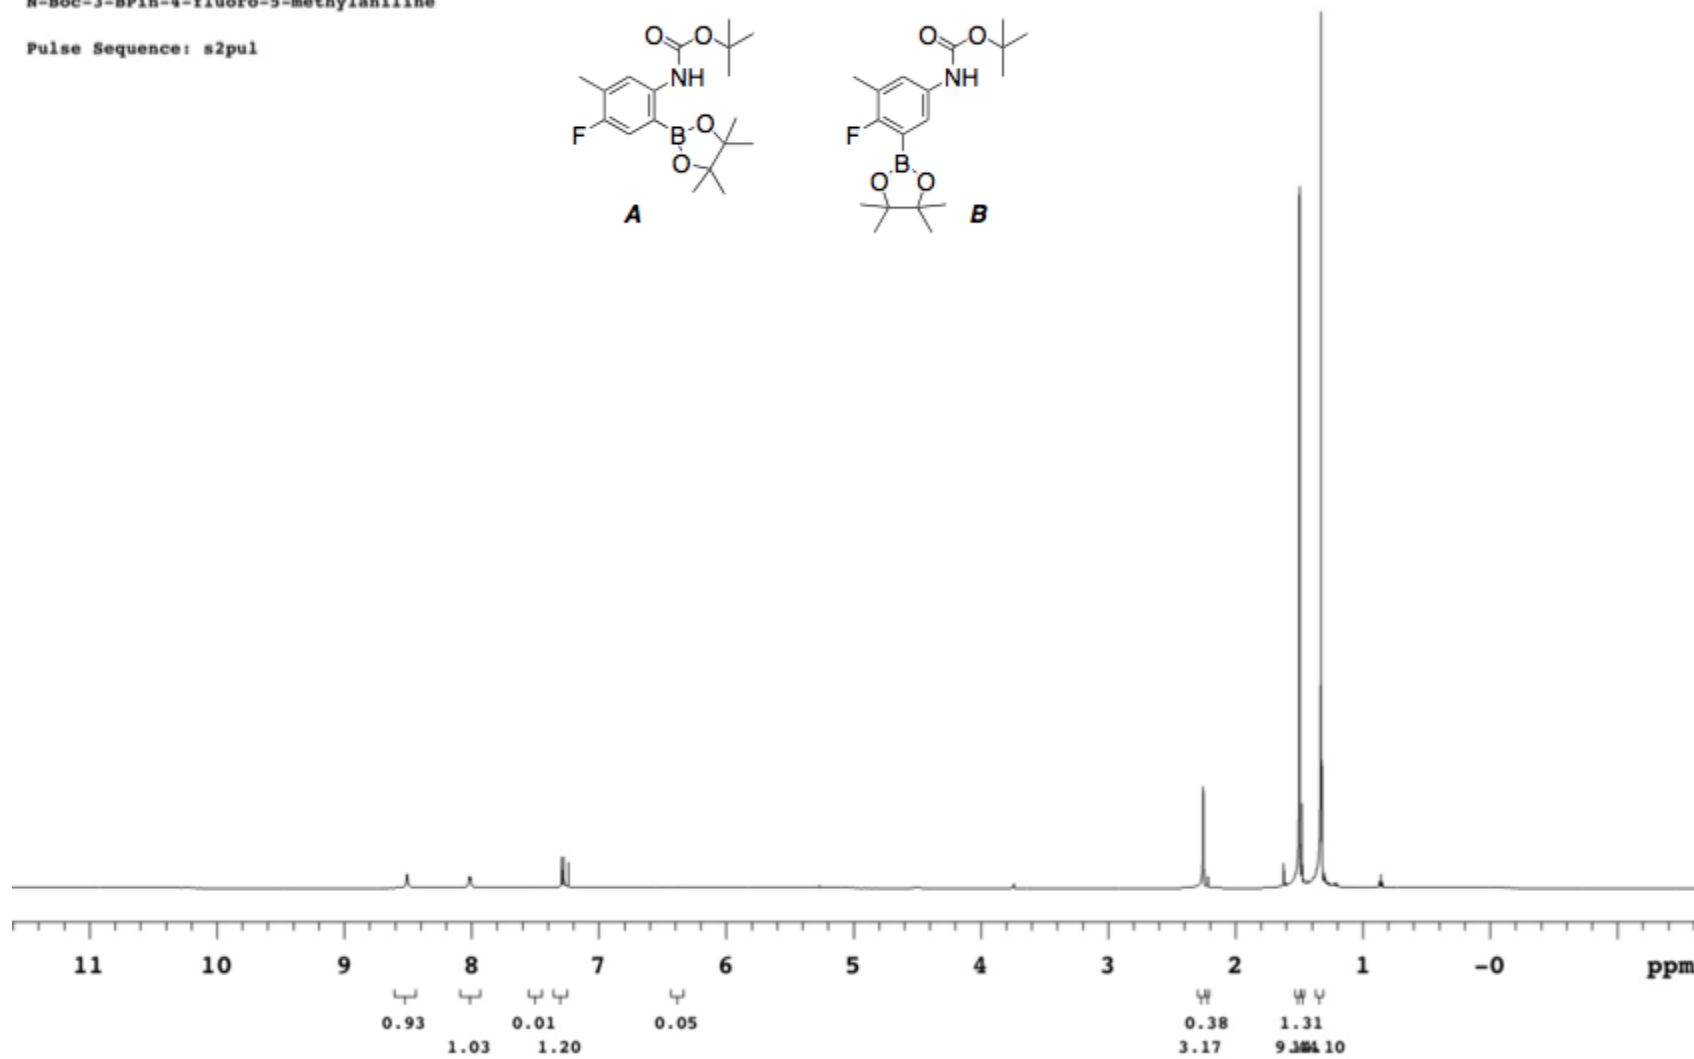

*Figure.* 600 MHz <sup>1</sup>H NMR spectrum of Table 1, entry 6A / Table 1, entry 6B

151MHz Isis CDC13=77p 13C  
N-Boc-2-BPin-4-fluoro-5-methylaniline and  
N-Boc-3-BPin-4-fluoro-5-methylaniline

Pulse Sequence: s2pul

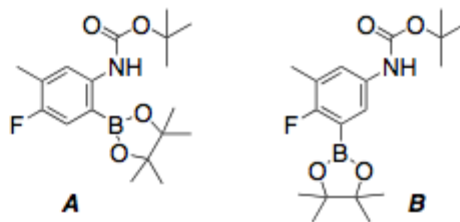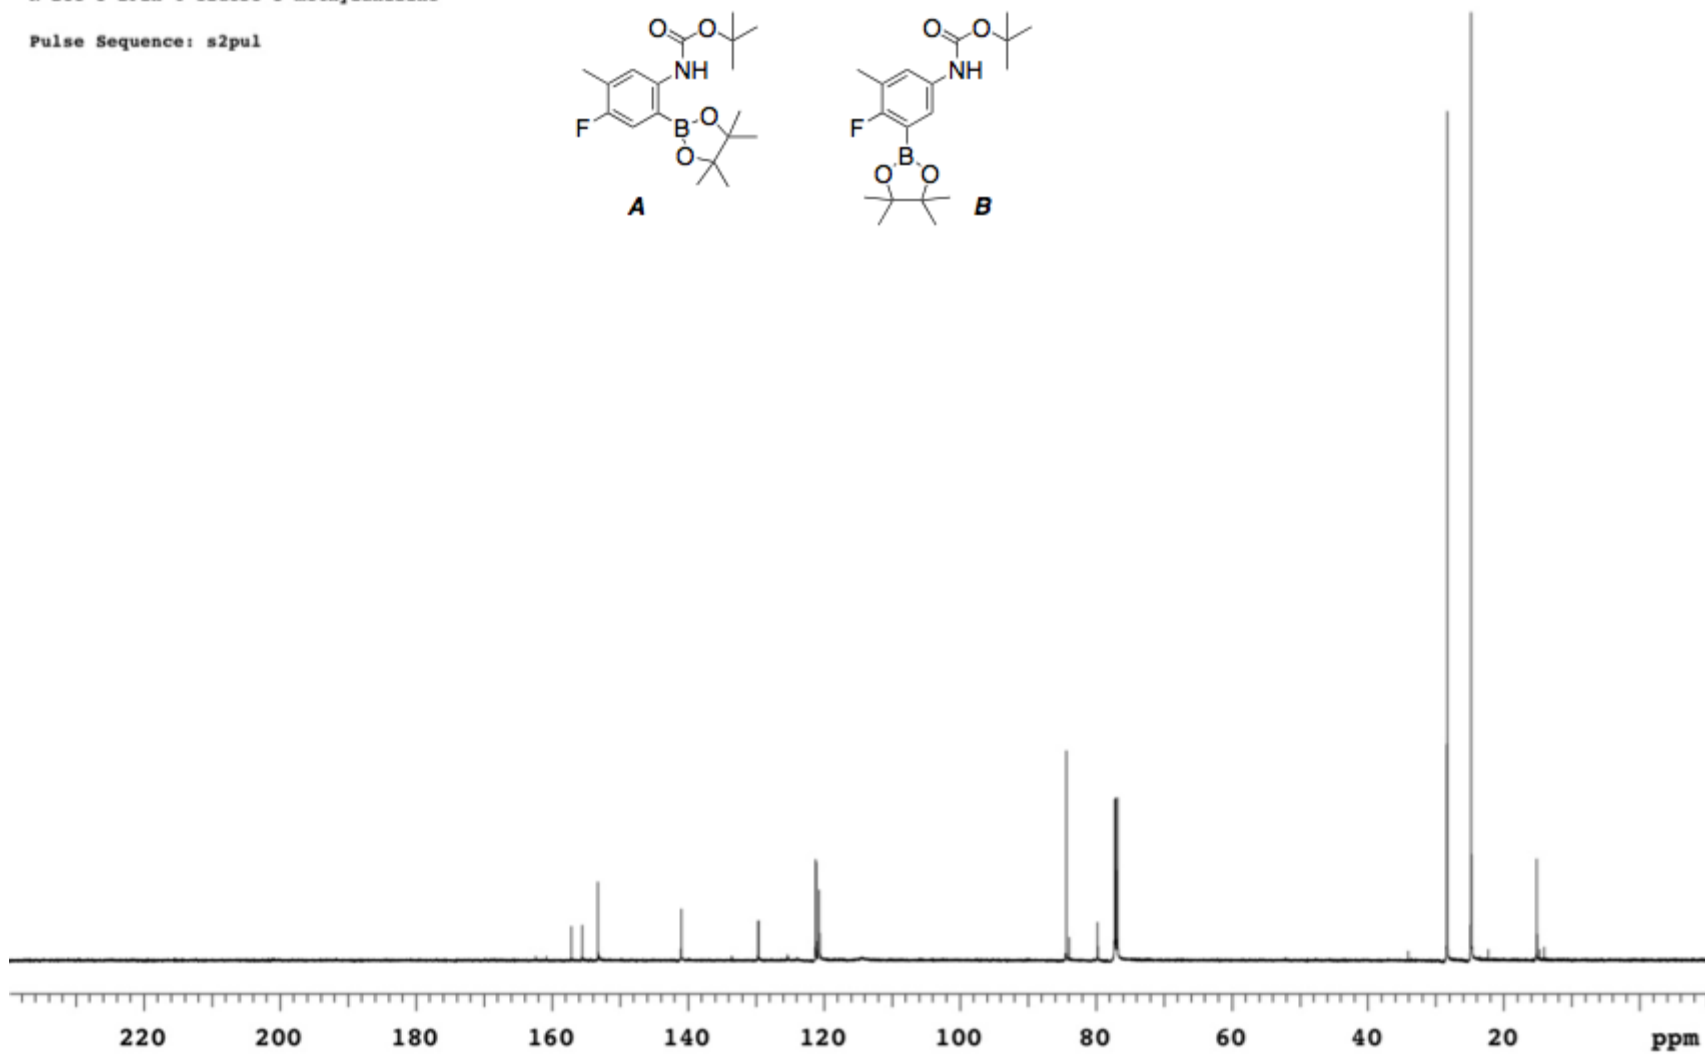

**Figure.** 151 MHz  $^{13}\text{C}$  NMR spectrum of **Table 1, entry 6A** / **Table 1, entry 6B**

500MHz CDCl<sub>3</sub>=7.24p 1H  
N-Boc-4-F-5-Me-2-BPin-aniline

Pulse Sequence: s2pul

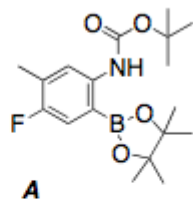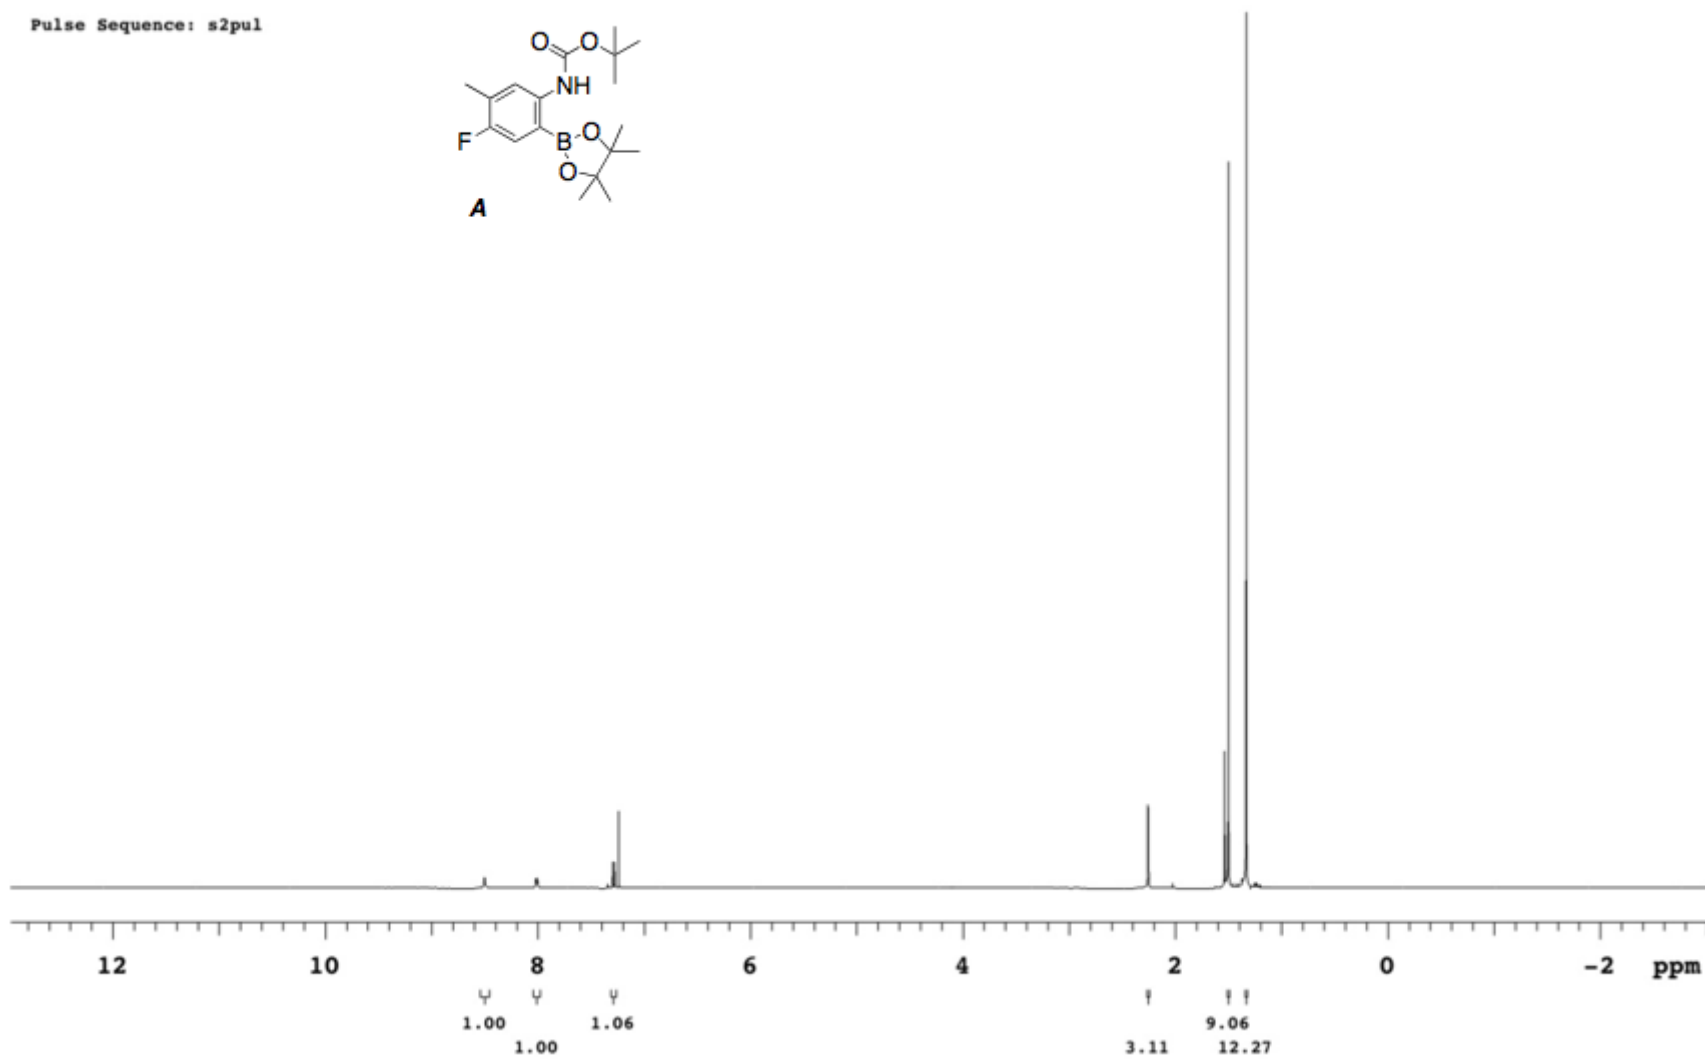

*Figure.* 500 MHz <sup>1</sup>H NMR spectrum of **Table 1, entry 6A**

151MHz CDCl3=77p 13C  
N-Boc-4-F-5-Me-2-BPin-aniline

Pulse Sequence: s2pul

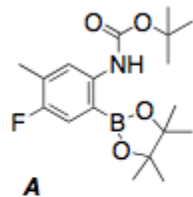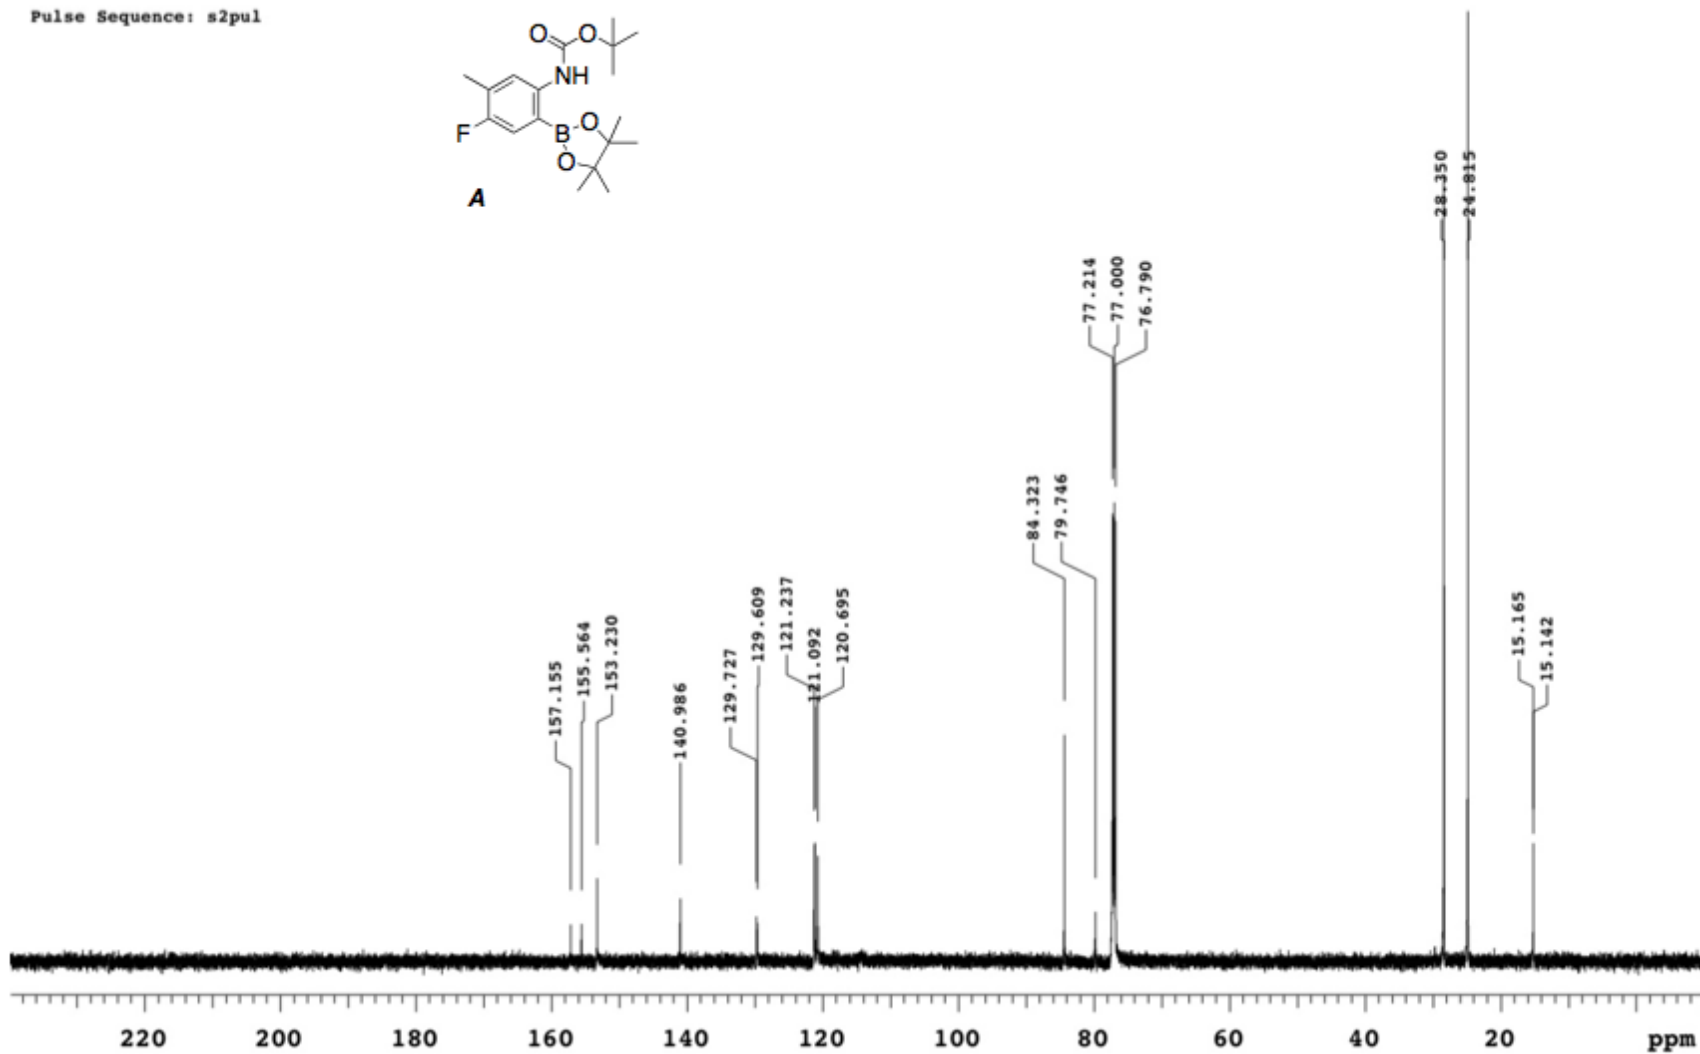

*Figure.* 151 MHz  $^{13}\text{C}$  NMR spectrum of **Table 1, entry 6A**

300MHz CDCl3=7.24p nOe  
nt=1600  
N-(Boc)-4-fluoro-5-methyl-2-BPin-aniline

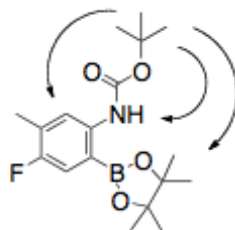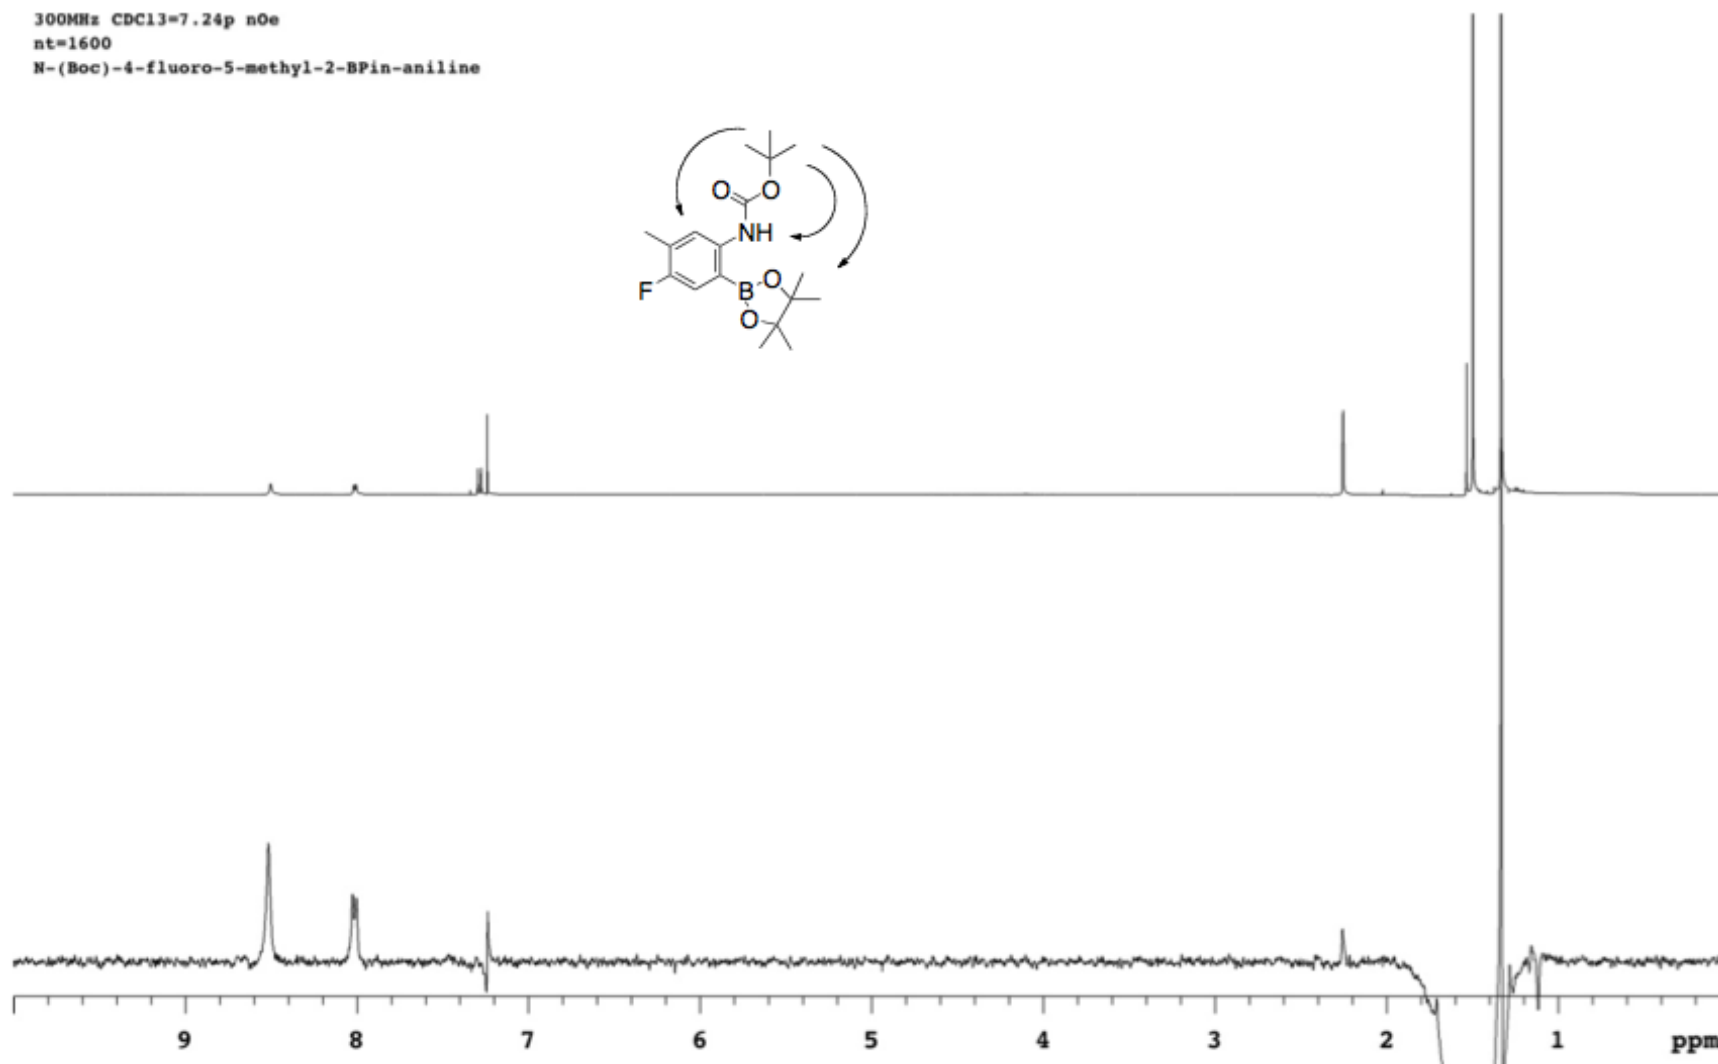

*Figure.* 300 MHz nOe NMR spectrum of Table 1, entry 6A

300MHz CDCl3=7.24p nOe  
nt=1600  
N-(Boc)-4-fluoro-5-methyl-2-BPin-aniline

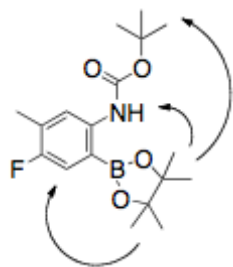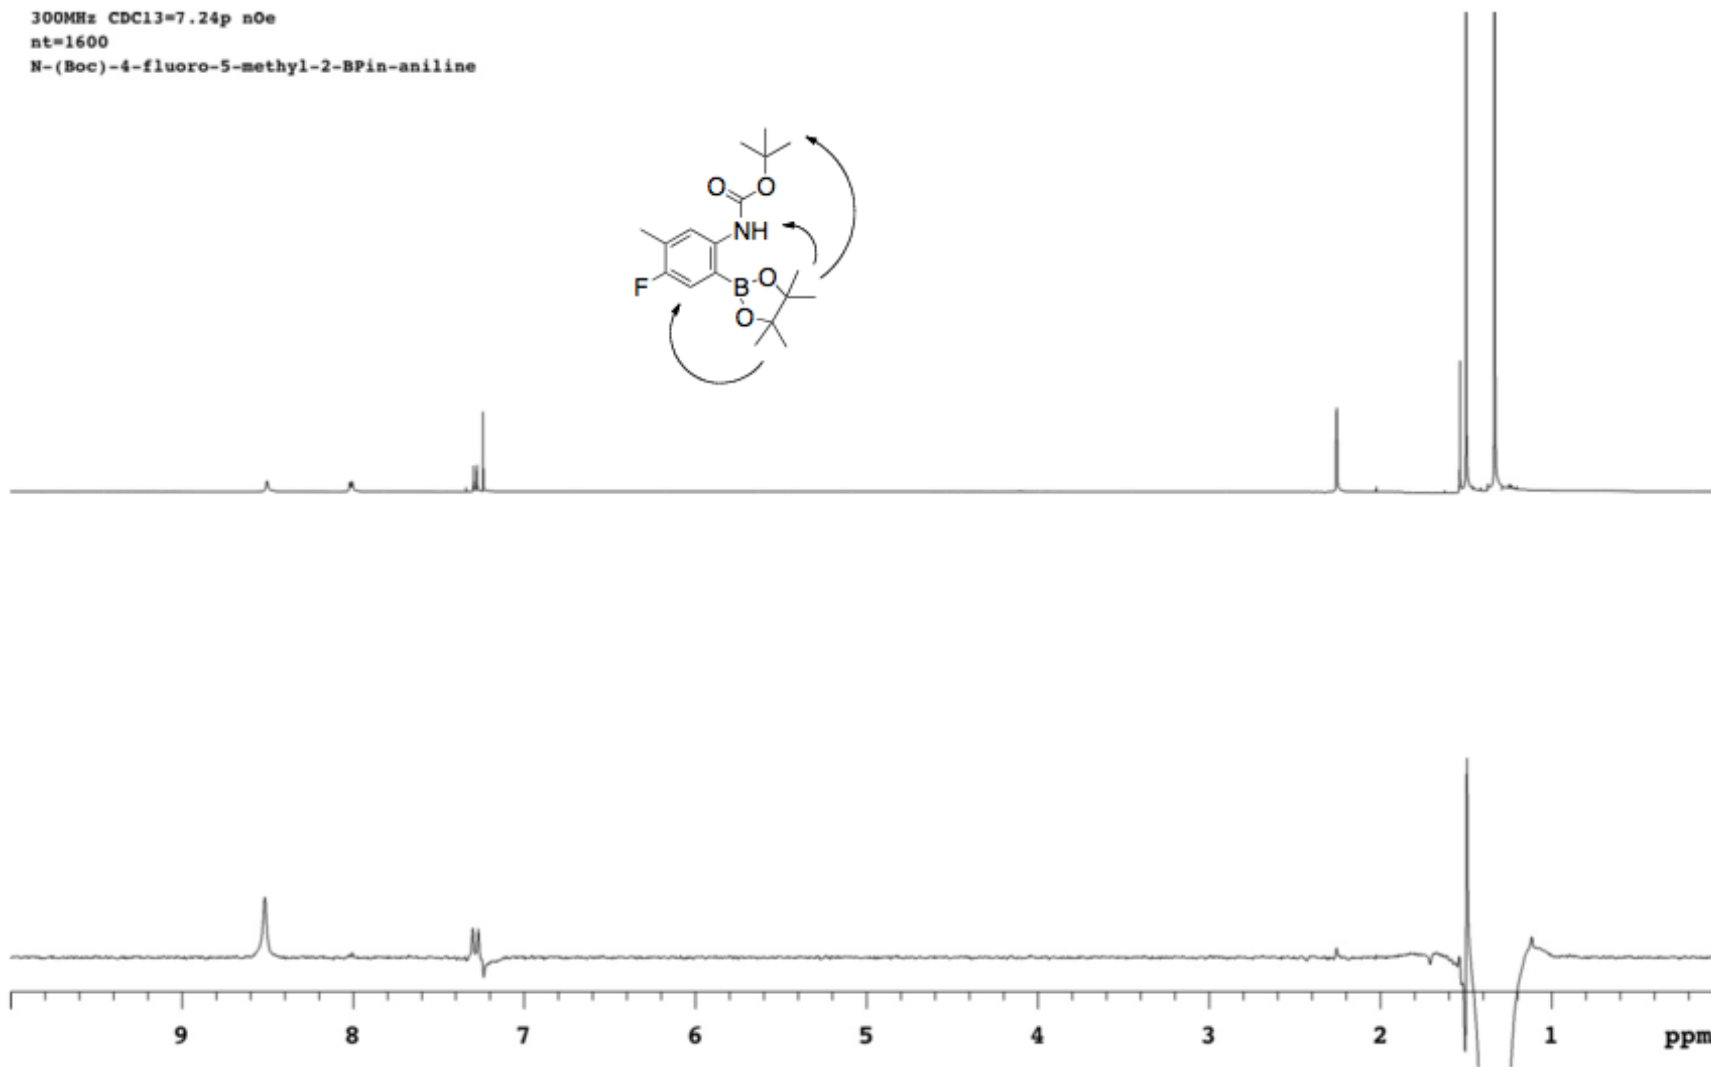

**Figure.** 300 MHz nOe NMR spectrum of Table 1, entry 6A



500MHz CDCl3=7.24p 1H  
5-Cl-4-OMe-2-BPin-NHBoc-aniline

Pulse Sequence: s2pul

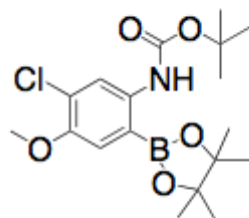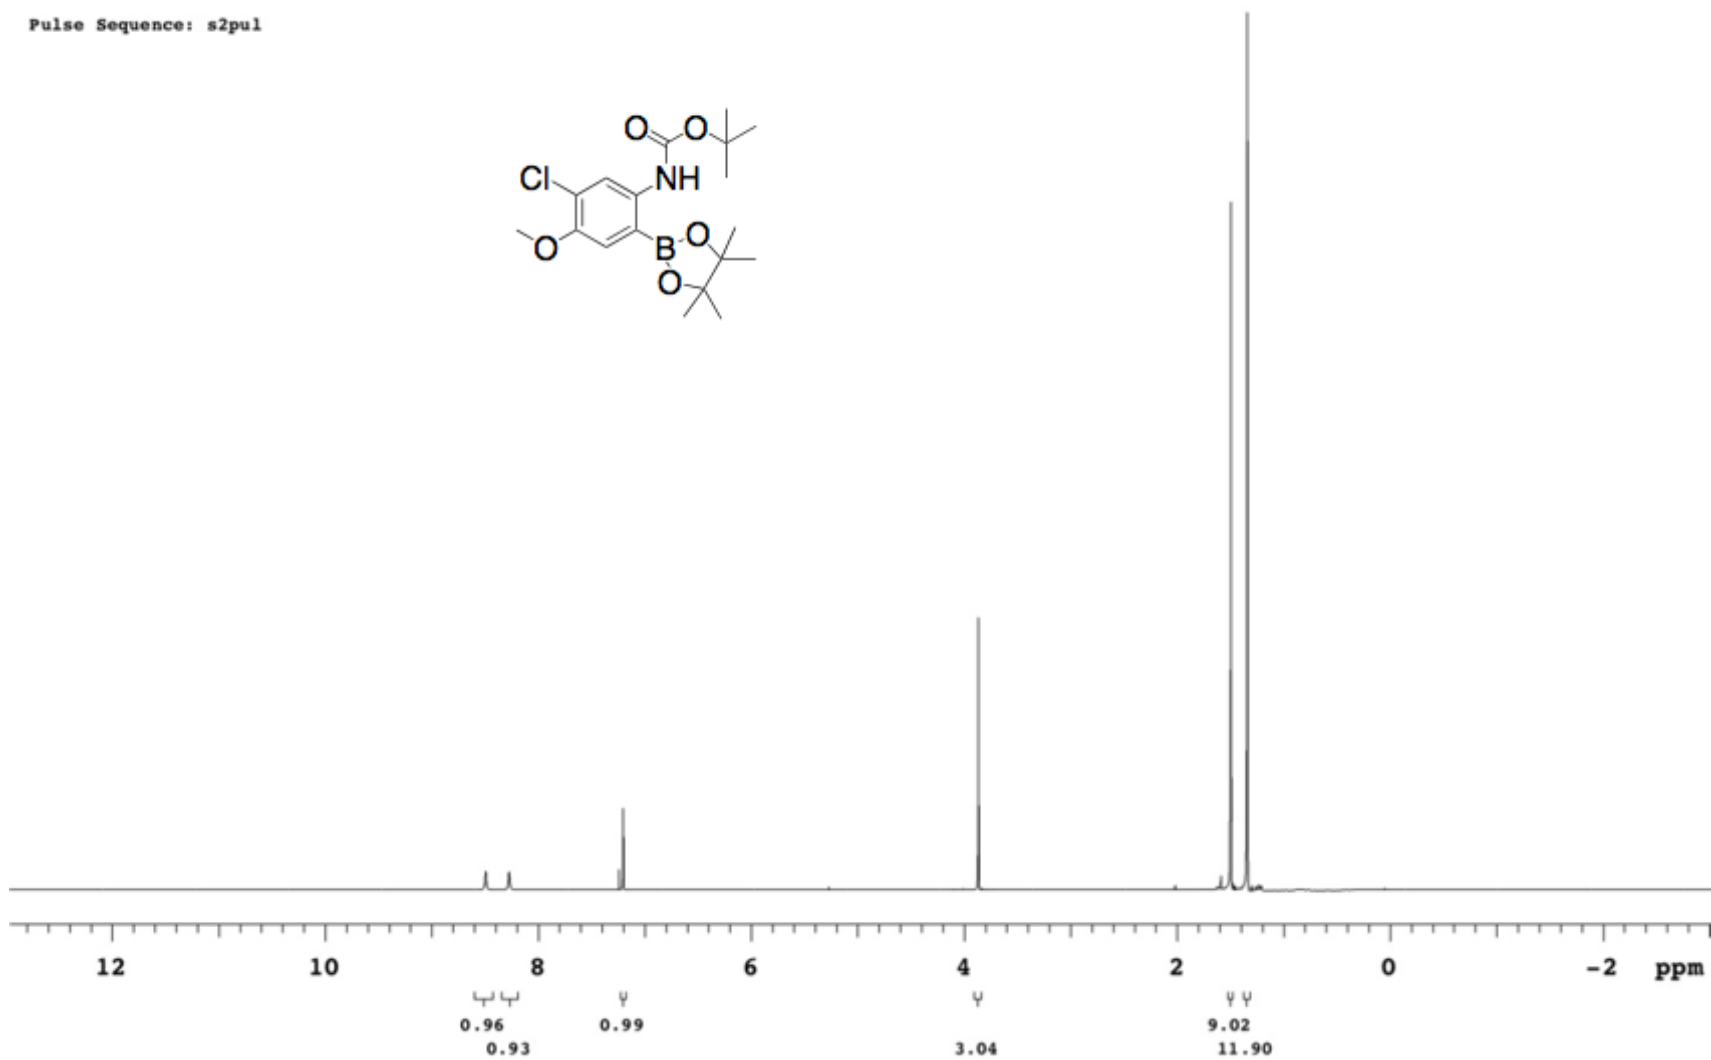

*Figure.* 500 MHz <sup>1</sup>H NMR spectrum of **Table 1, entry 7**

126MHz CDCl<sub>3</sub>=77p 13C  
5-Cl-4-OMe-2-BPin-NHBoc-aniline

Pulse Sequence: s2pul

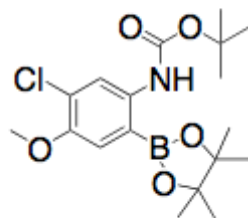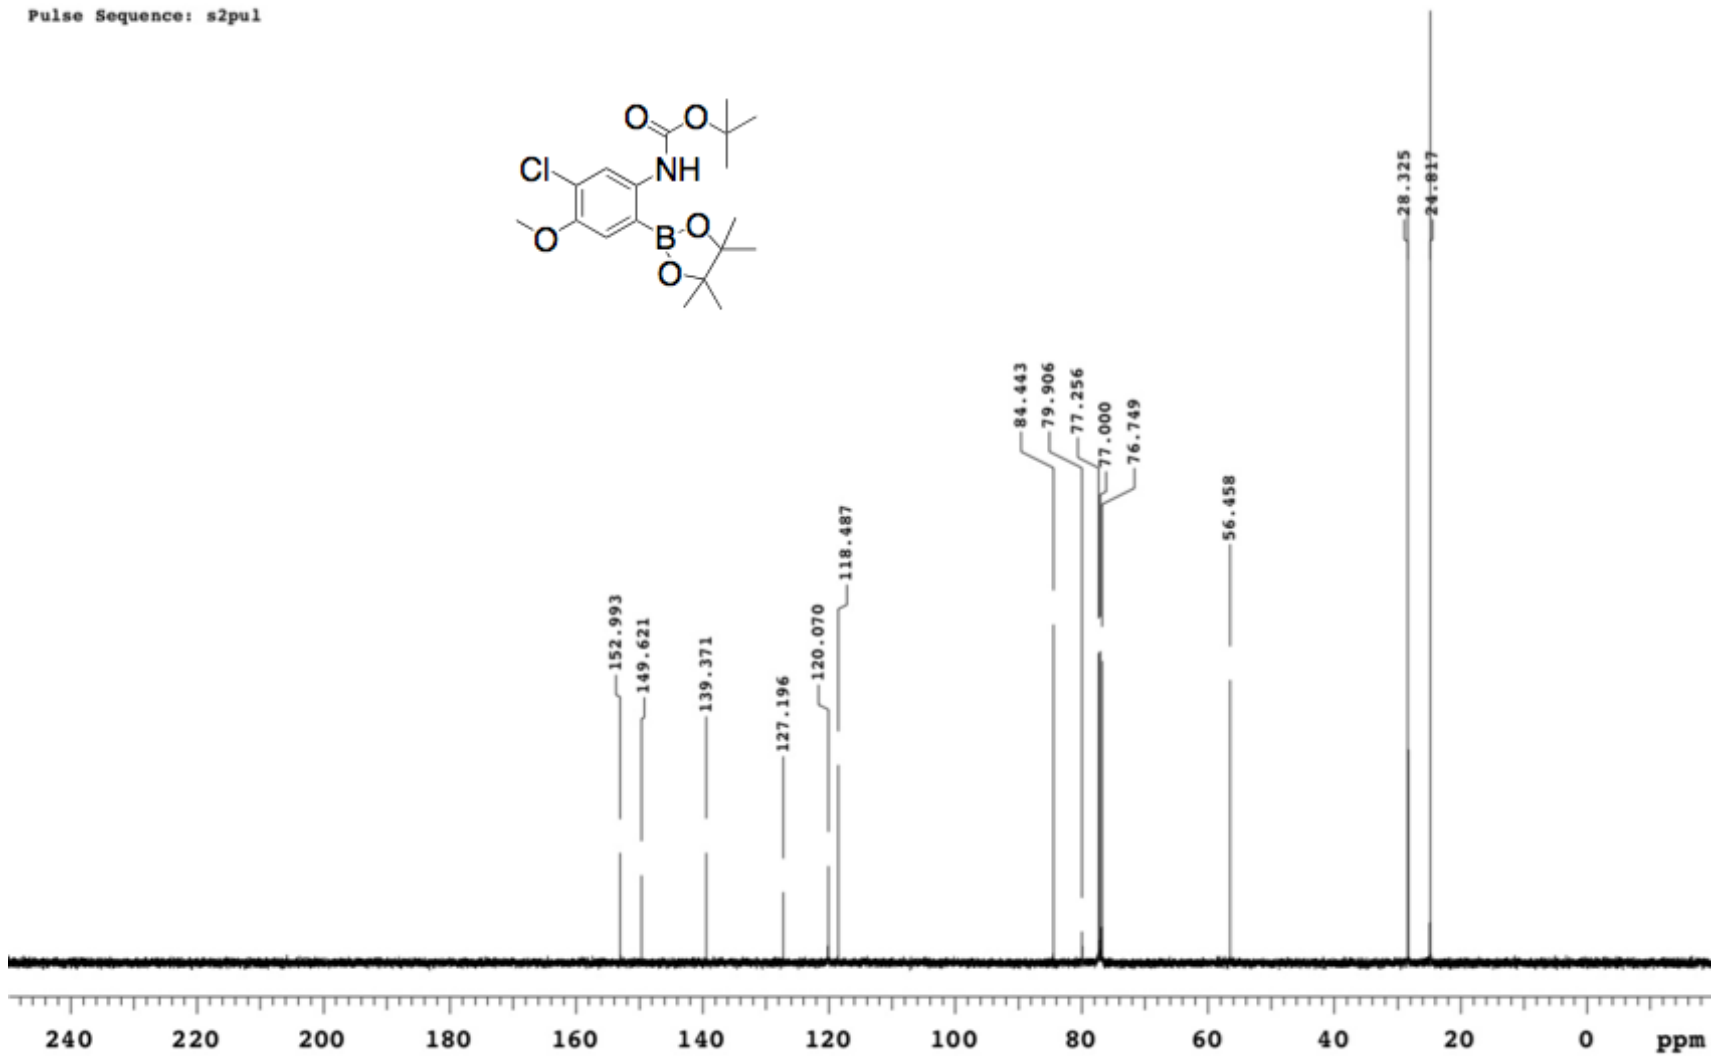

*Figure.* 126 MHz <sup>13</sup>C NMR spectrum of Table 1, entry 7

500MHz CDCl3=7.24p nOe  
nt=128  
N-(Boc)-5-chloro-3-methoxy-2-BPin-aniline

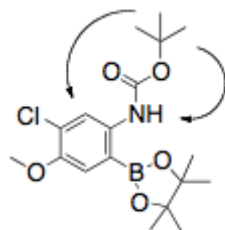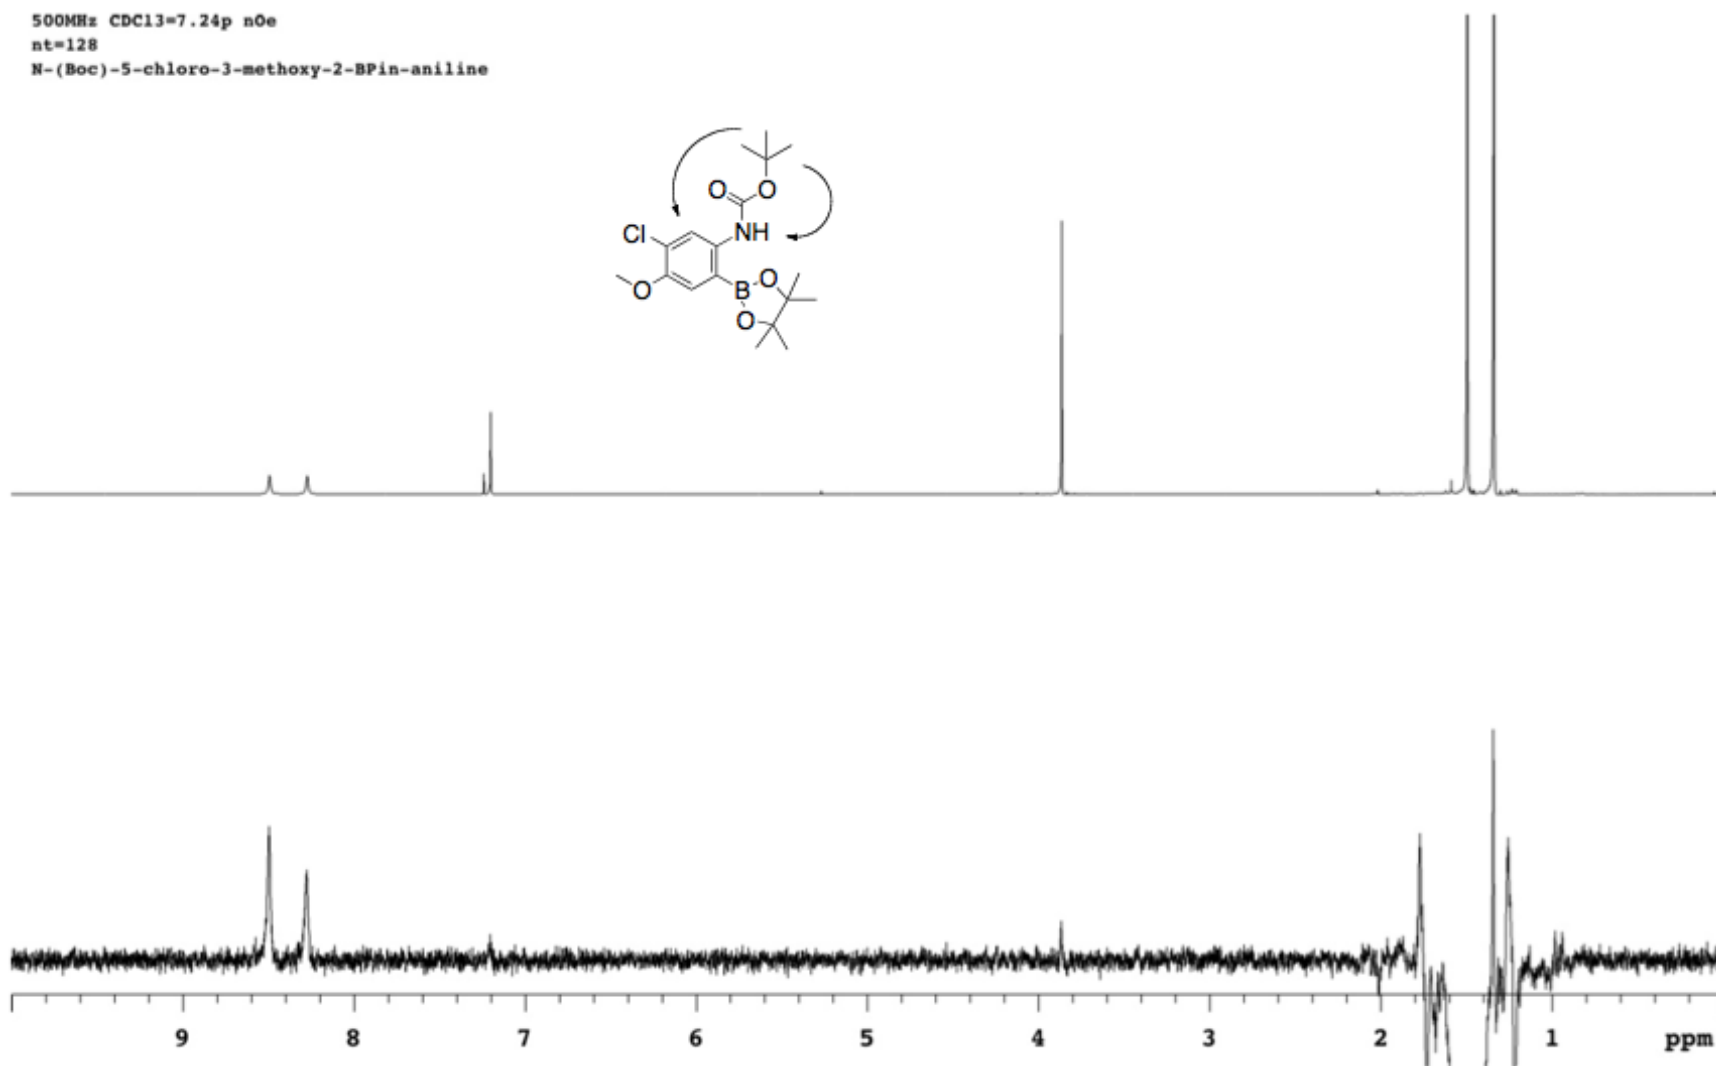

*Figure.* 500 MHz nOe NMR spectrum of **Table 1, entry 7**

500MHz CDCl3=7.24p nOe  
nt=128  
N-(Boc)-5-chloro-3-methoxy-2-BPin-aniline

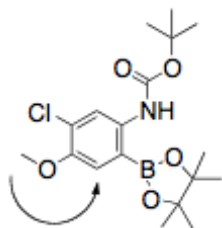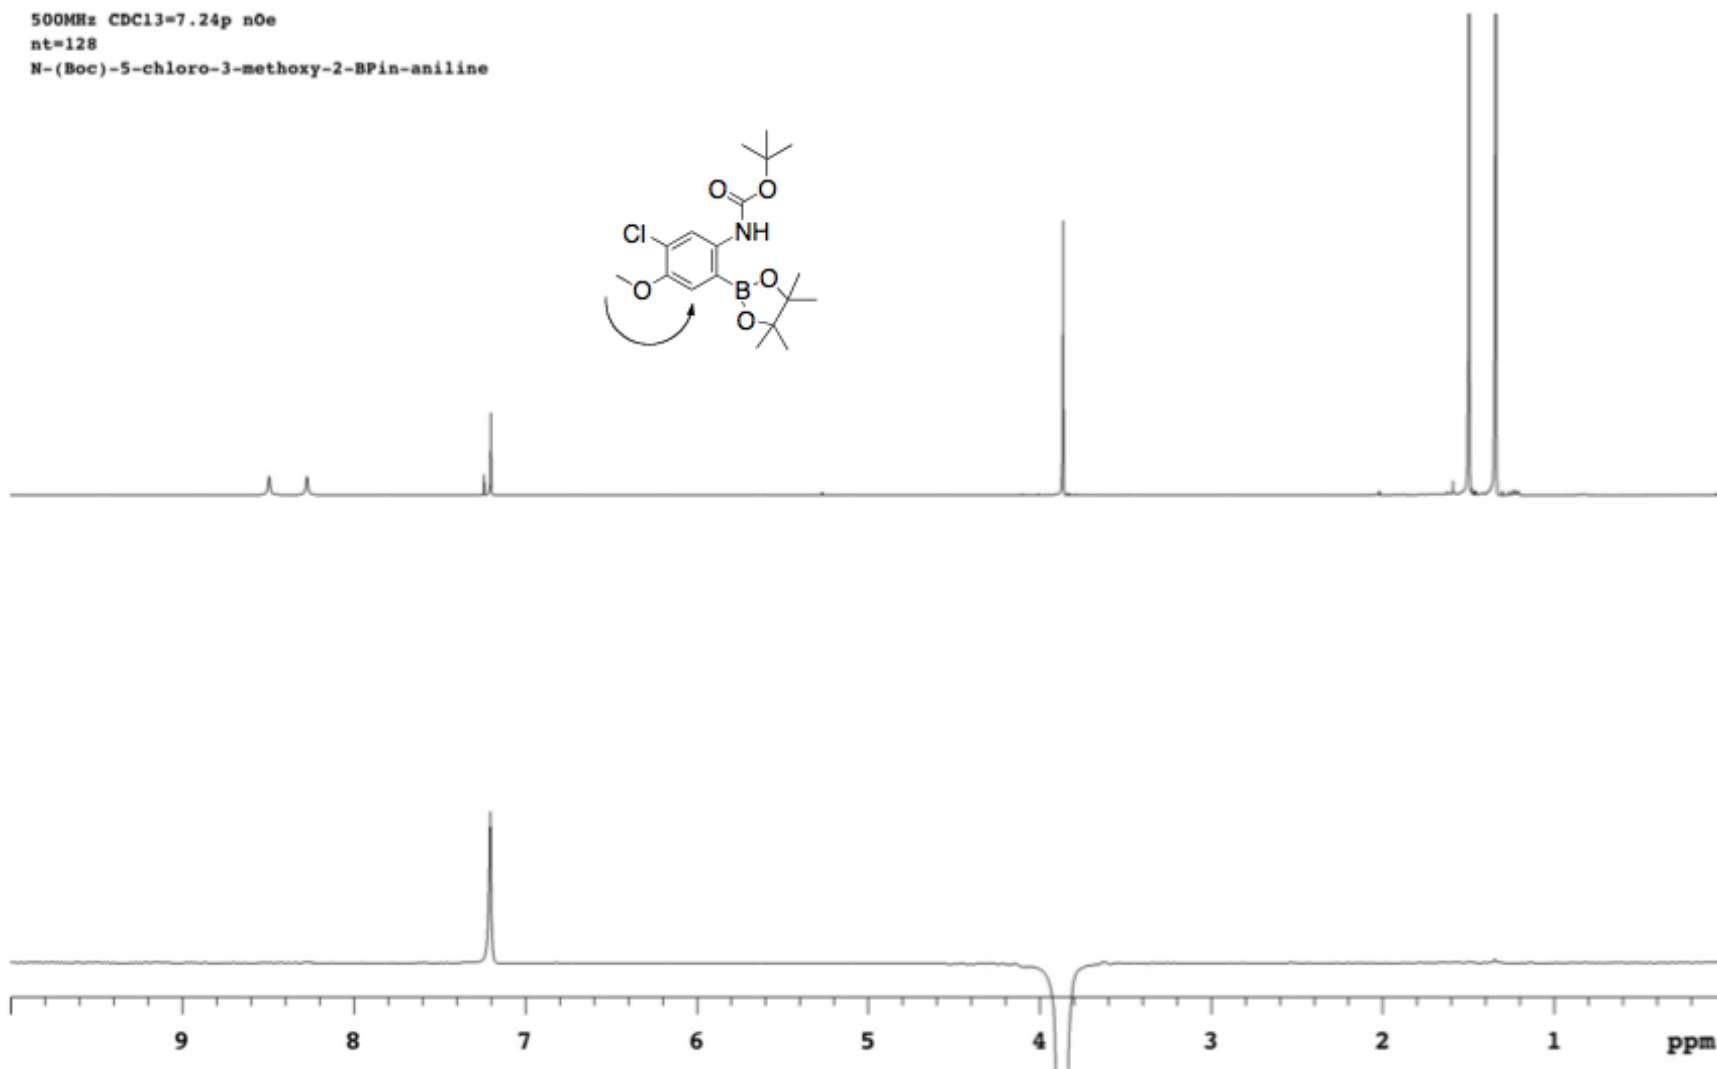

*Figure.* 500 MHz nOe NMR spectrum of **Table 1, entry 7**

500MHz CDCl<sub>3</sub>=7.24p 1H  
4-CF<sub>3</sub>-2-BPin-NHBoc-aniline

Pulse Sequence: s2pul

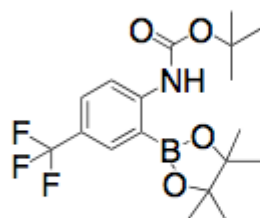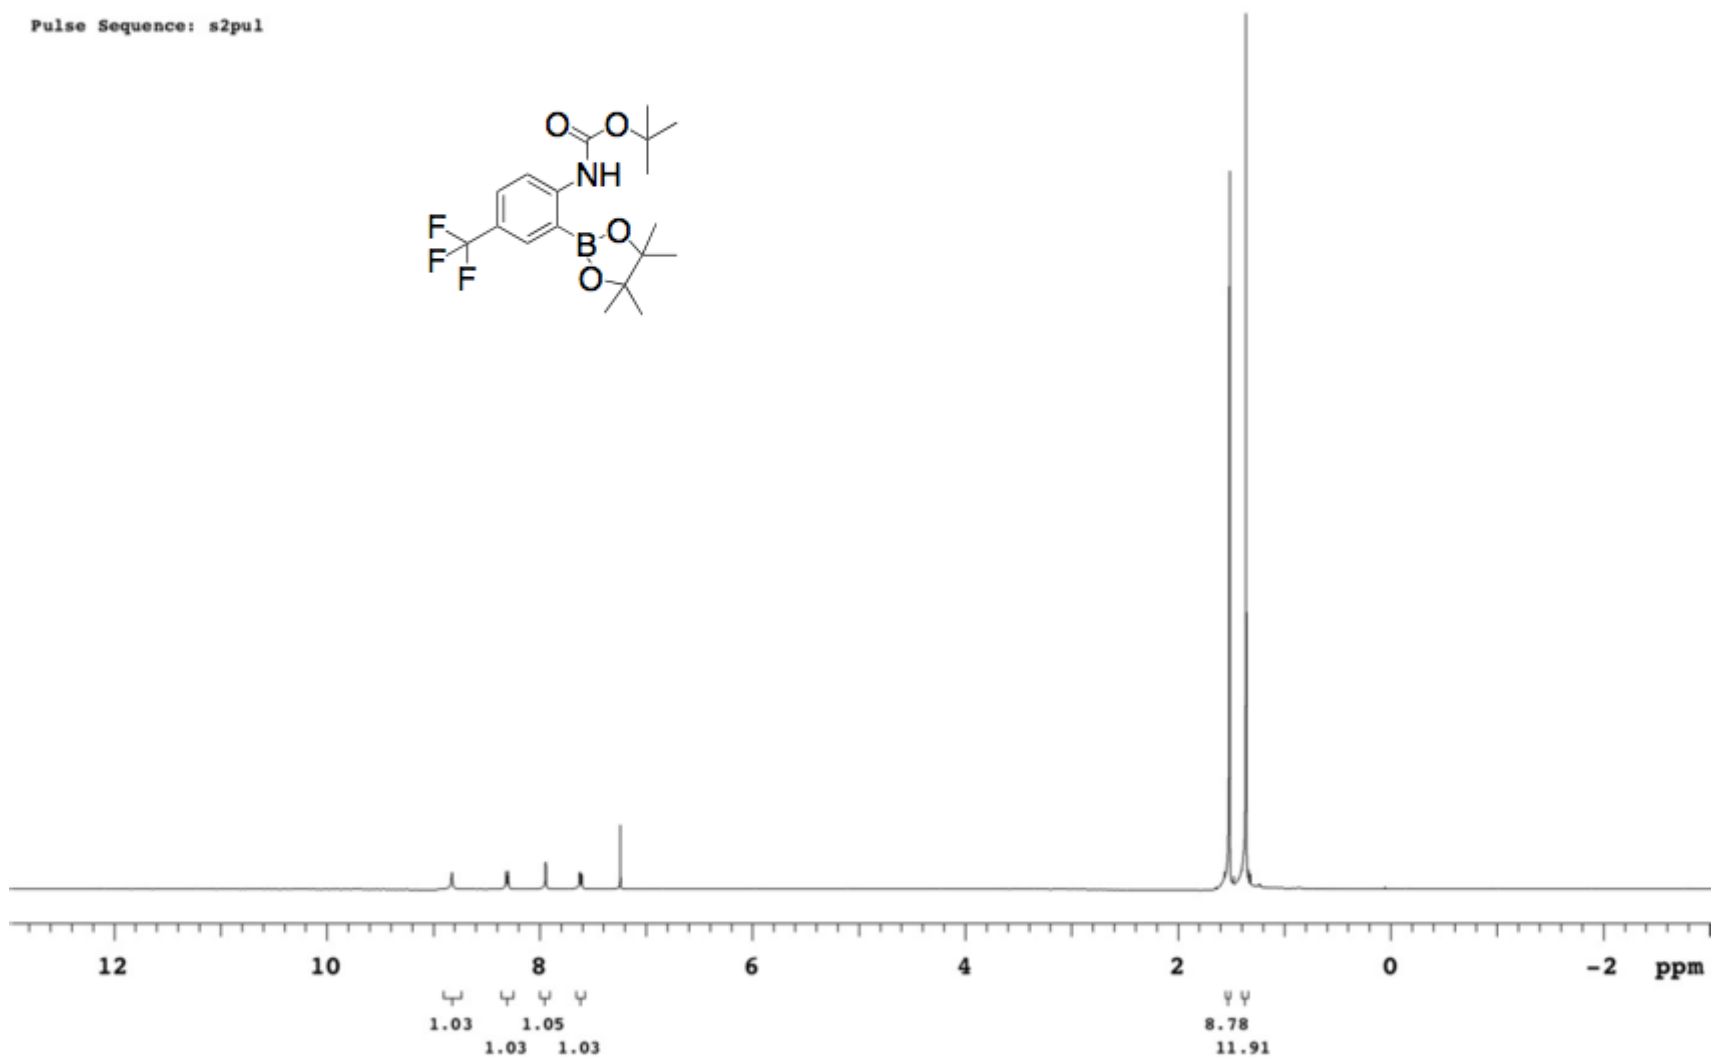

*Figure.* 500 MHz <sup>1</sup>H NMR spectrum of Table 1, entry 8

126MHz CDCl<sub>3</sub>=77p 13C  
4-CF<sub>3</sub>-2-BPin-NHBoc-aniline

Pulse Sequence: s2pul

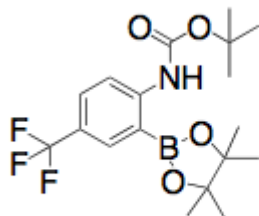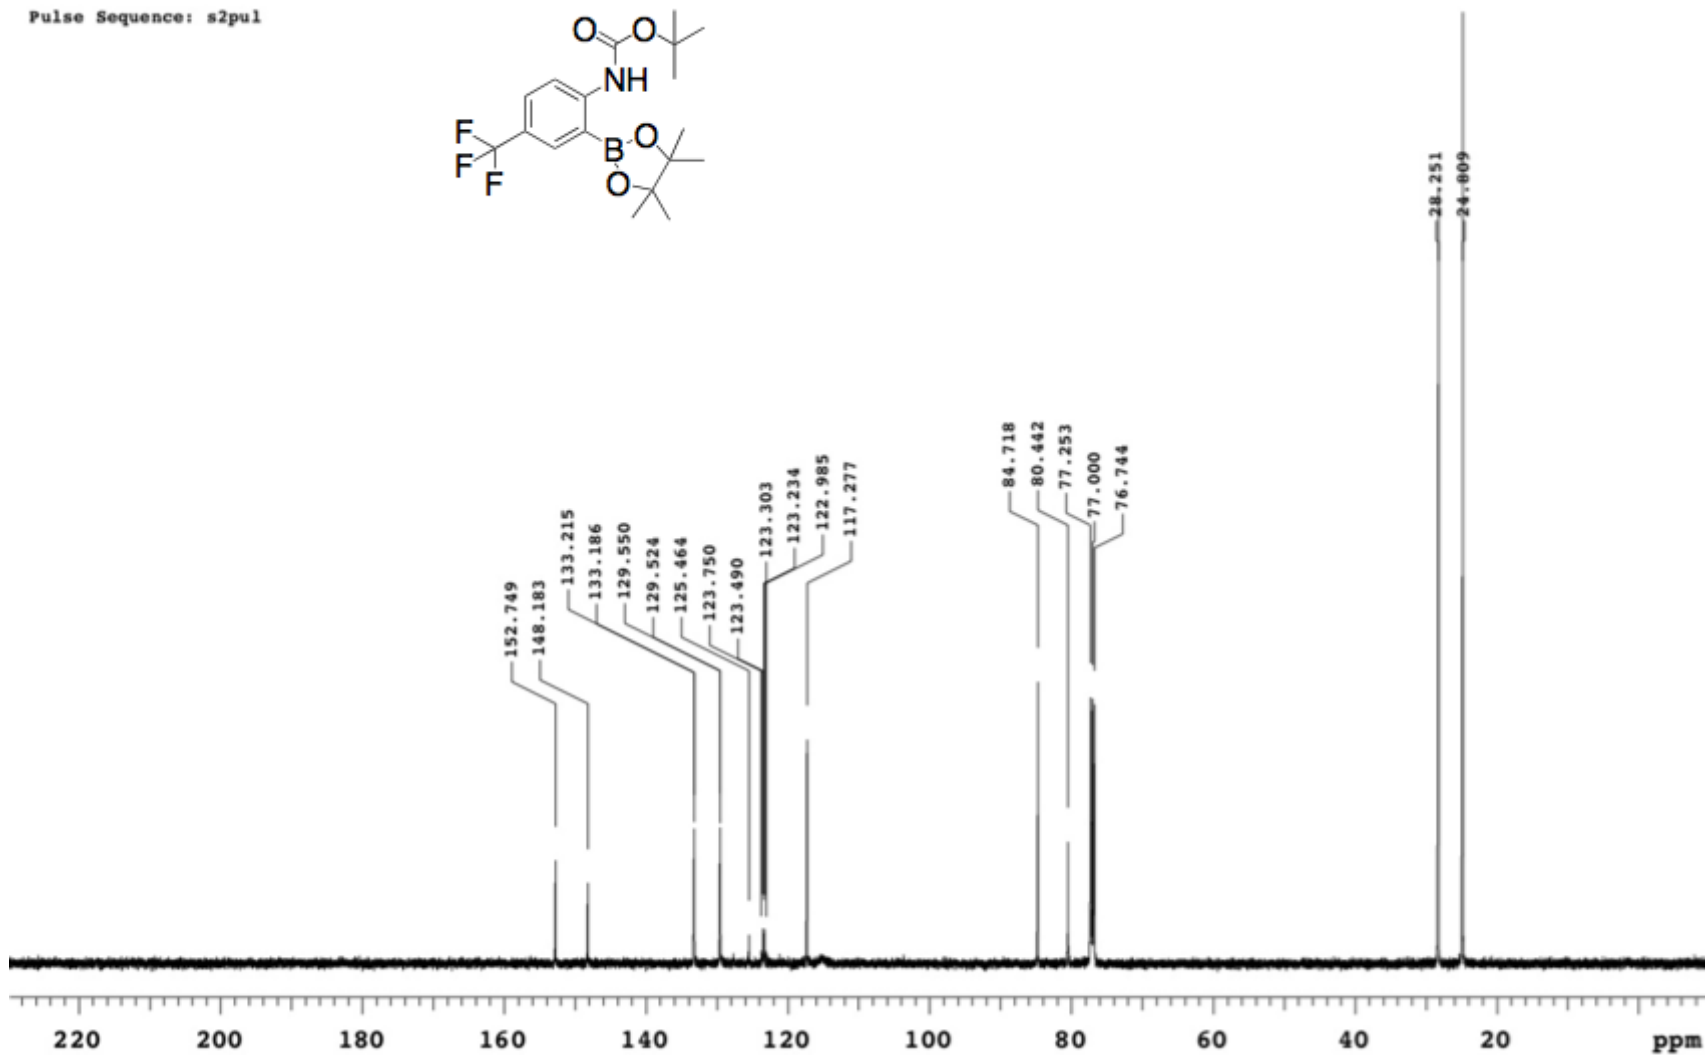

*Figure.* 126 MHz <sup>13</sup>C NMR spectrum of Table 1, entry 8

500MHz CDCl3=7.24p nOe  
nt=128  
N-(Boc)-4-CF3-2-BPin-aniline

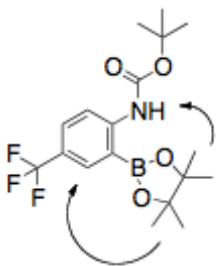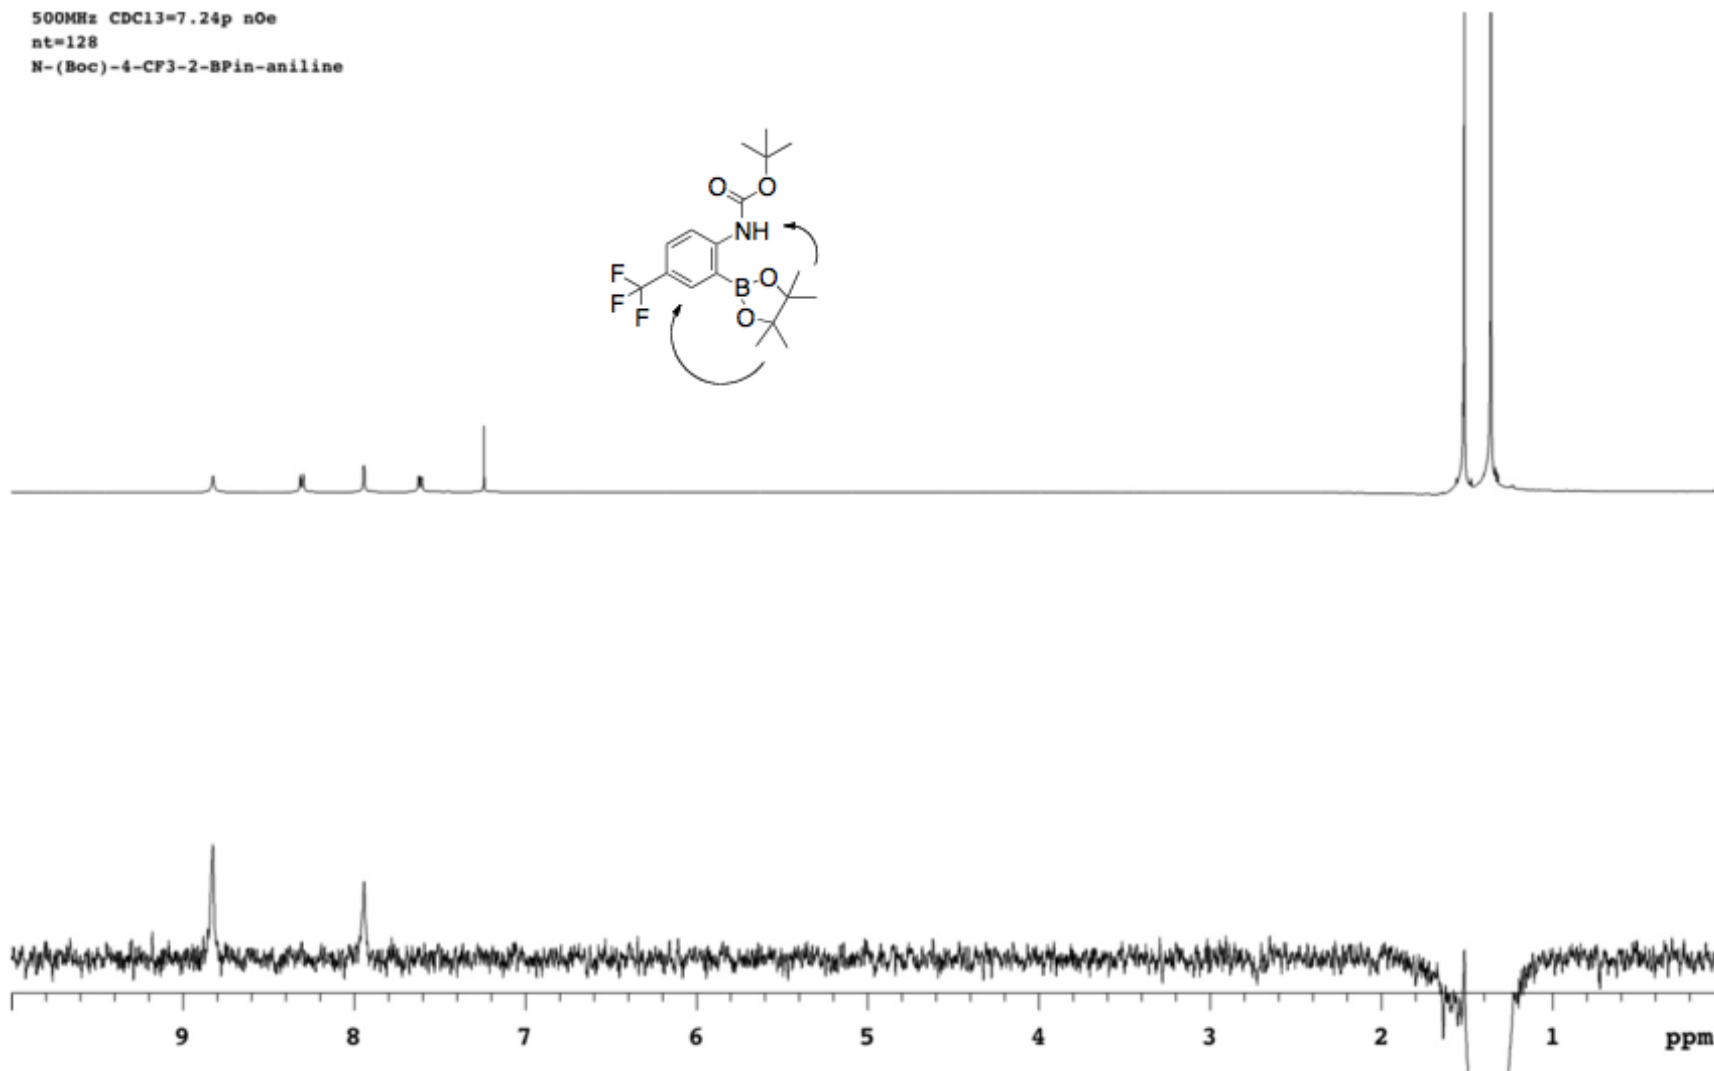

*Figure.* 500 MHz nOe NMR spectrum of **Table 1, entry 8**

500MHz CDCl3=7.24p 1H  
4-(CONMe2)-2-BPin-NHBoc-aniline

Pulse Sequence: s2pul

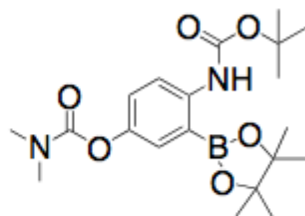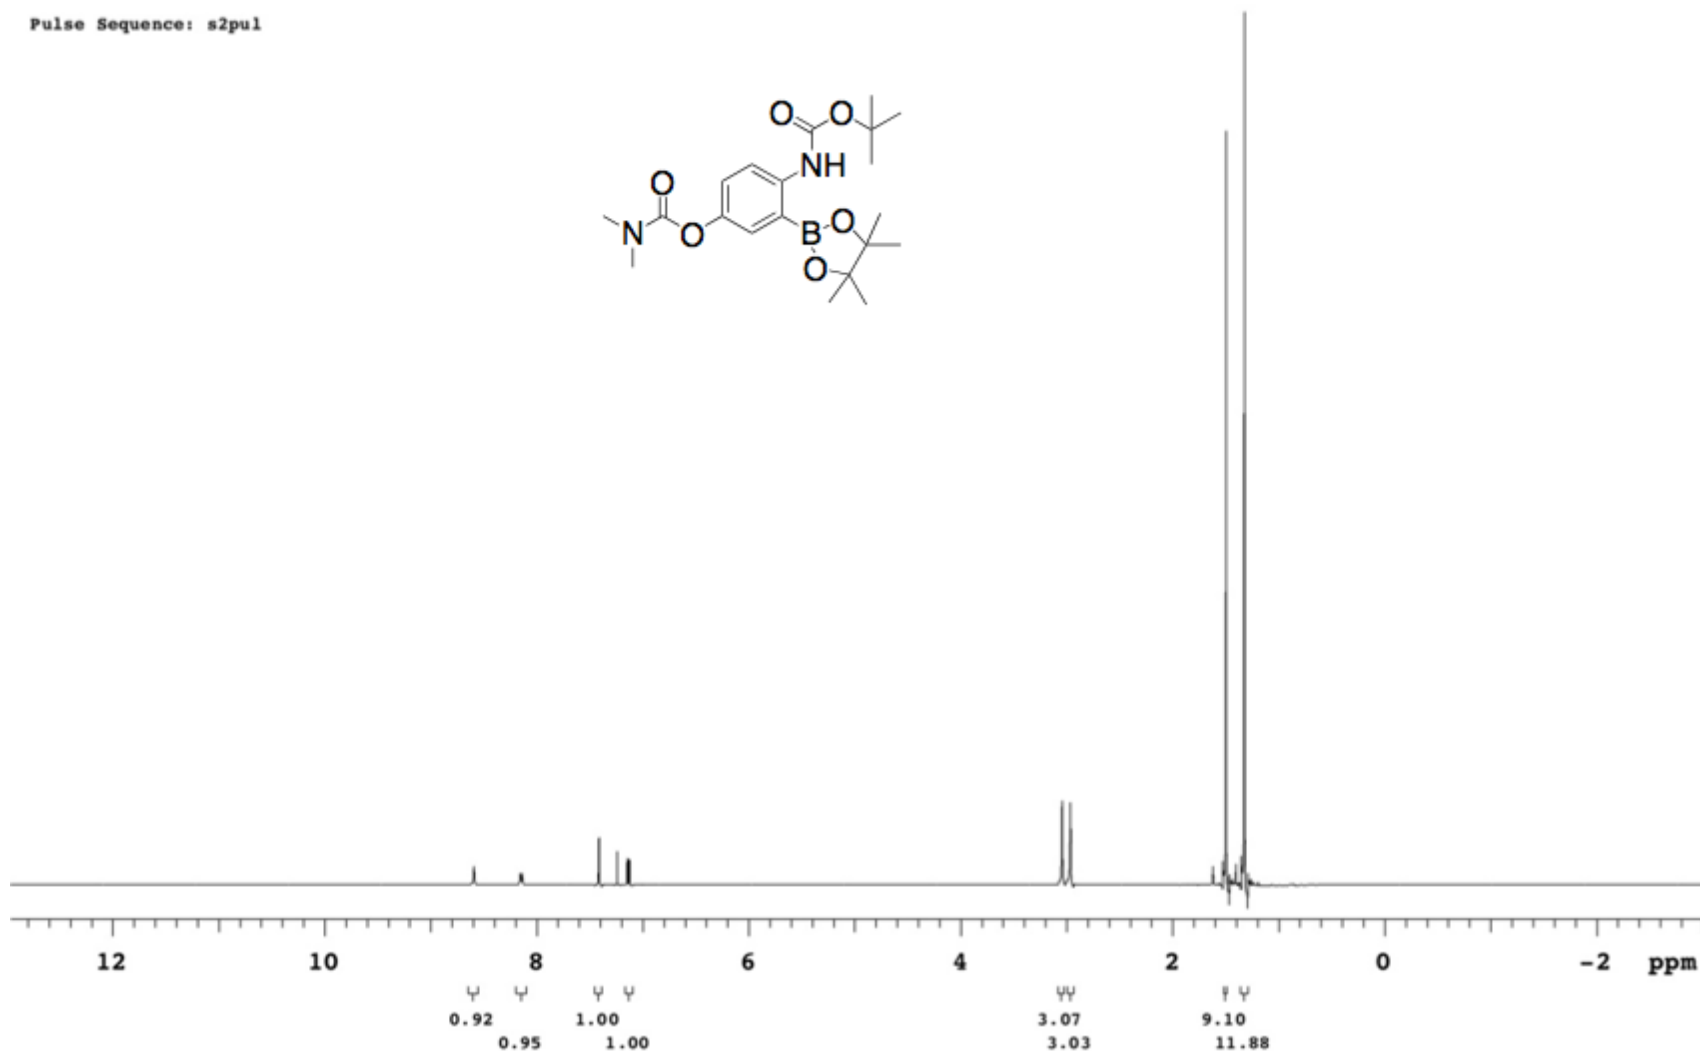

*Figure.* 500 MHz  $^1\text{H}$  NMR spectrum of Table 1, entry 9



126MHz CDC13=77p 13C  
4-(CONMe2)-2-BPin-NHBoc-aniline

Pulse Sequence: s2pul

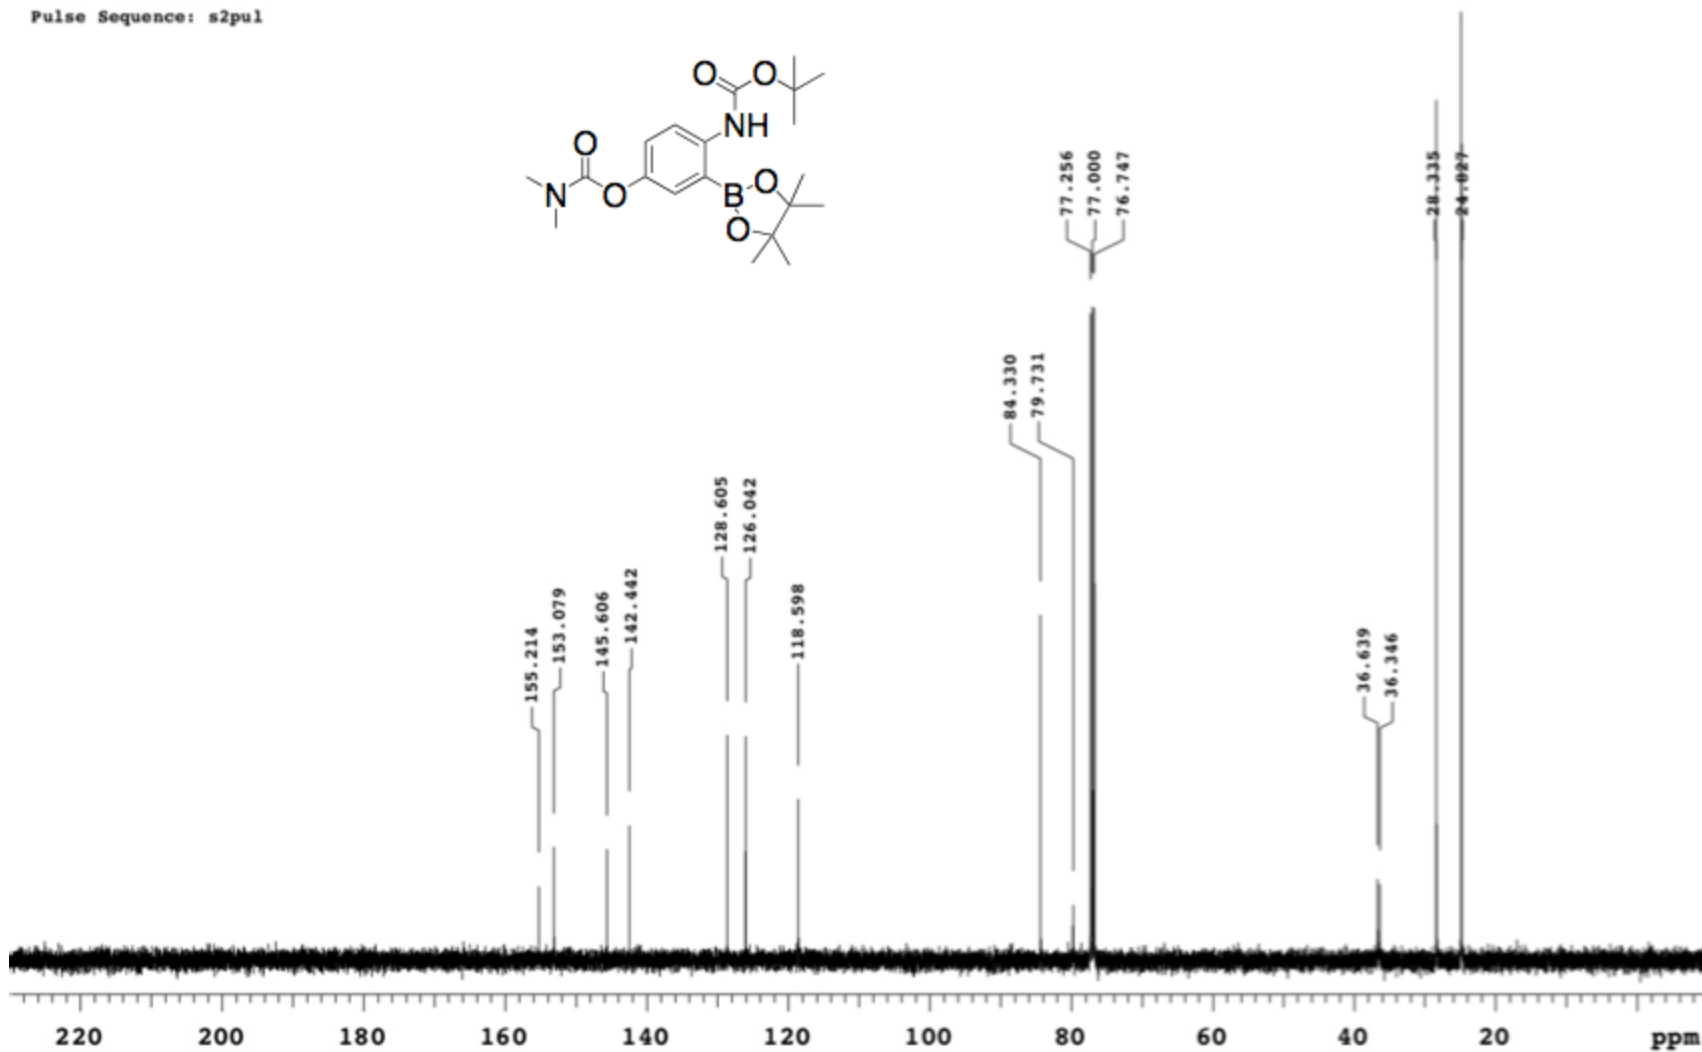

*Figure.* 126 MHz <sup>13</sup>C NMR spectrum of Table 1, entry 9

500MHz CDCl<sub>3</sub>=7.24p nOe  
nt=32  
N-(Boc)-4-(OCOMe<sub>2</sub>)-2-BPin-aniline

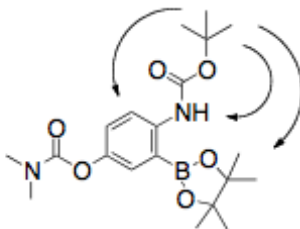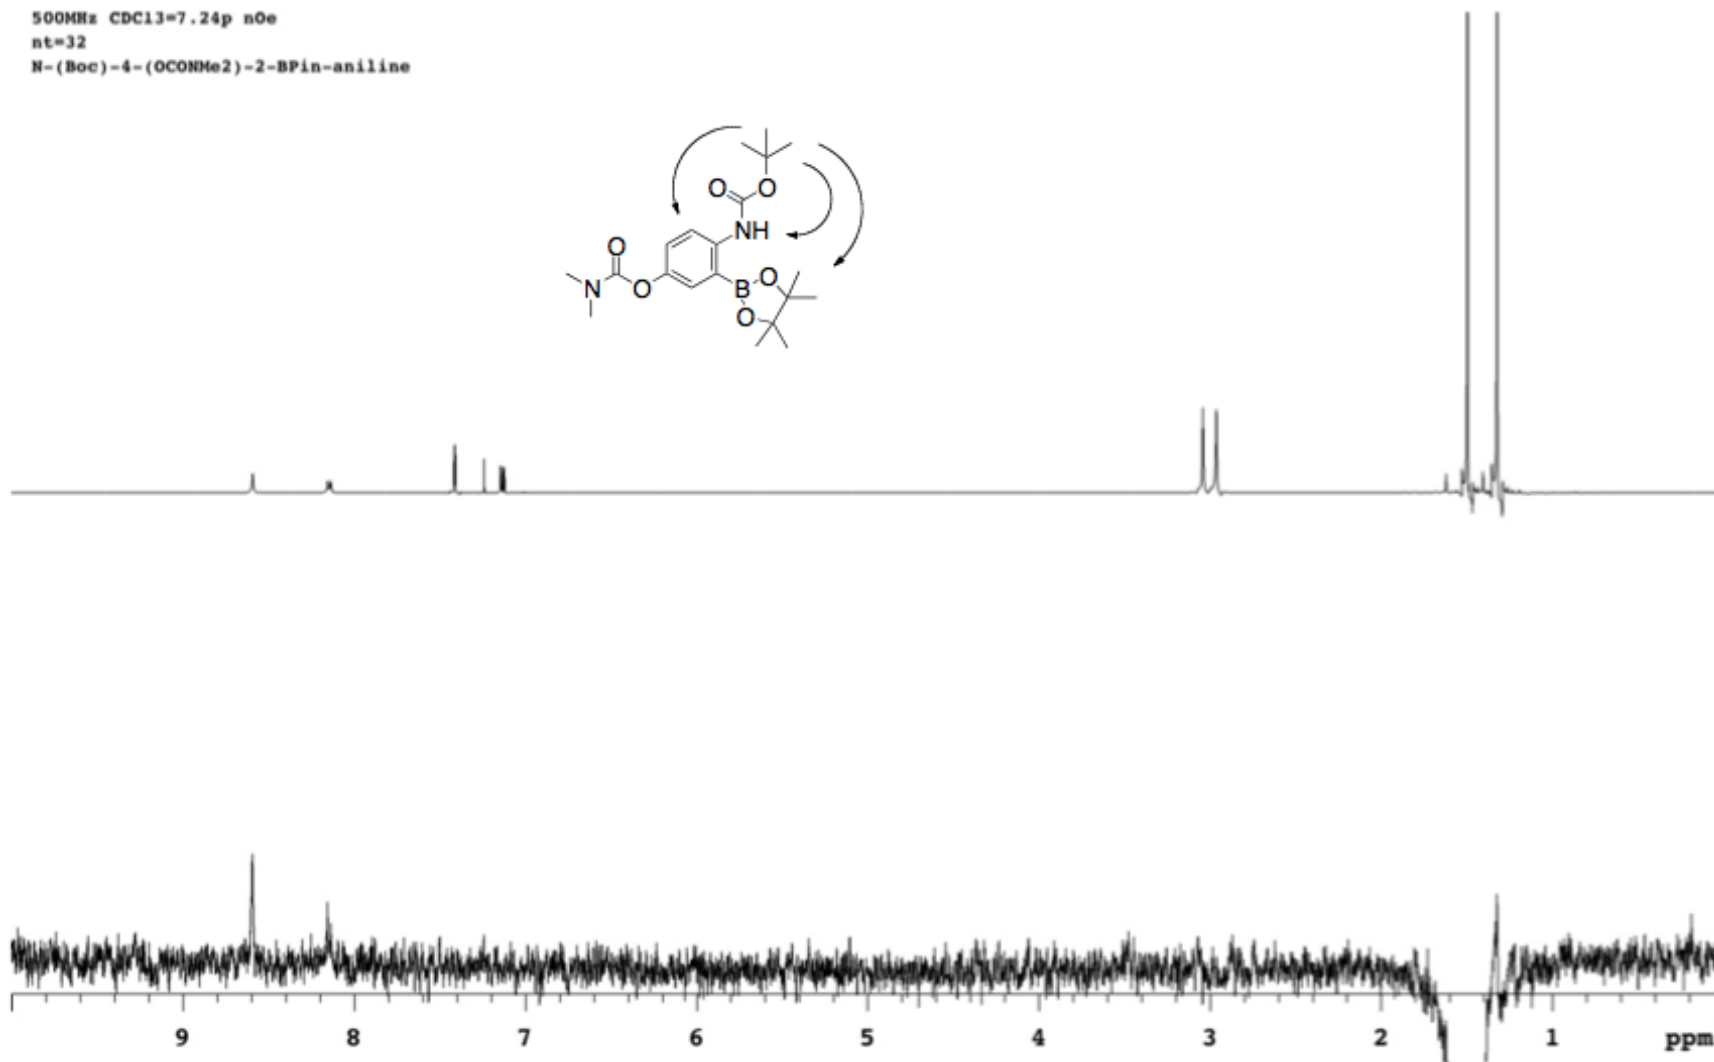

*Figure.* 500 MHz nOe NMR spectrum of **Table 1, entry 9**

500MHz CDCl3=7.24p nOe  
nt=32  
N-(Boc)-4-(OCOMe2)-2-BPin-aniline

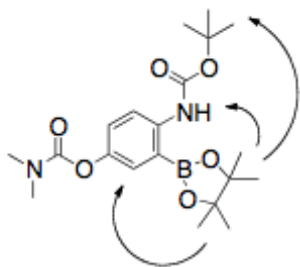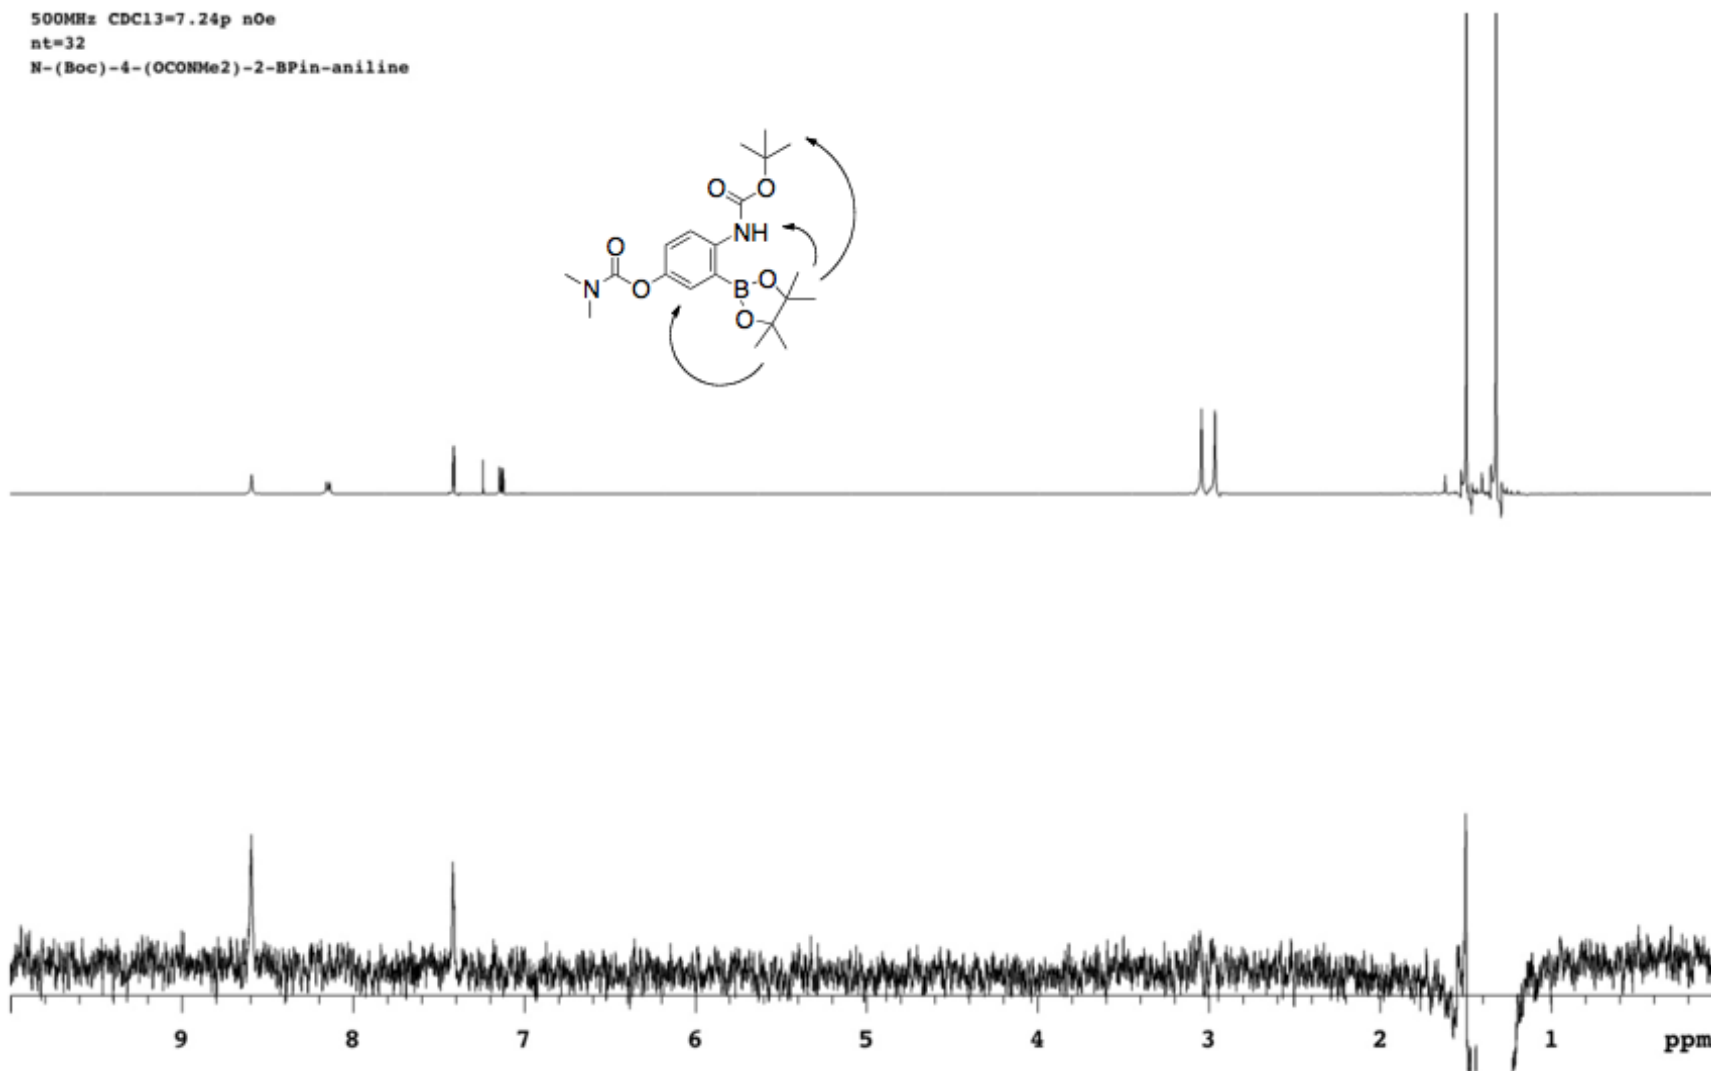

*Figure.* 500 MHz nOe NMR spectrum of **Table 1, entry 9**

300MHz CDCl3=7.24p 1H  
O-(CONMe2)-N-(Boc)-2-Cl-5-BPin-4-aminophenol

Pulse Sequence: s2pul

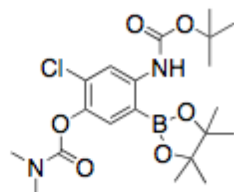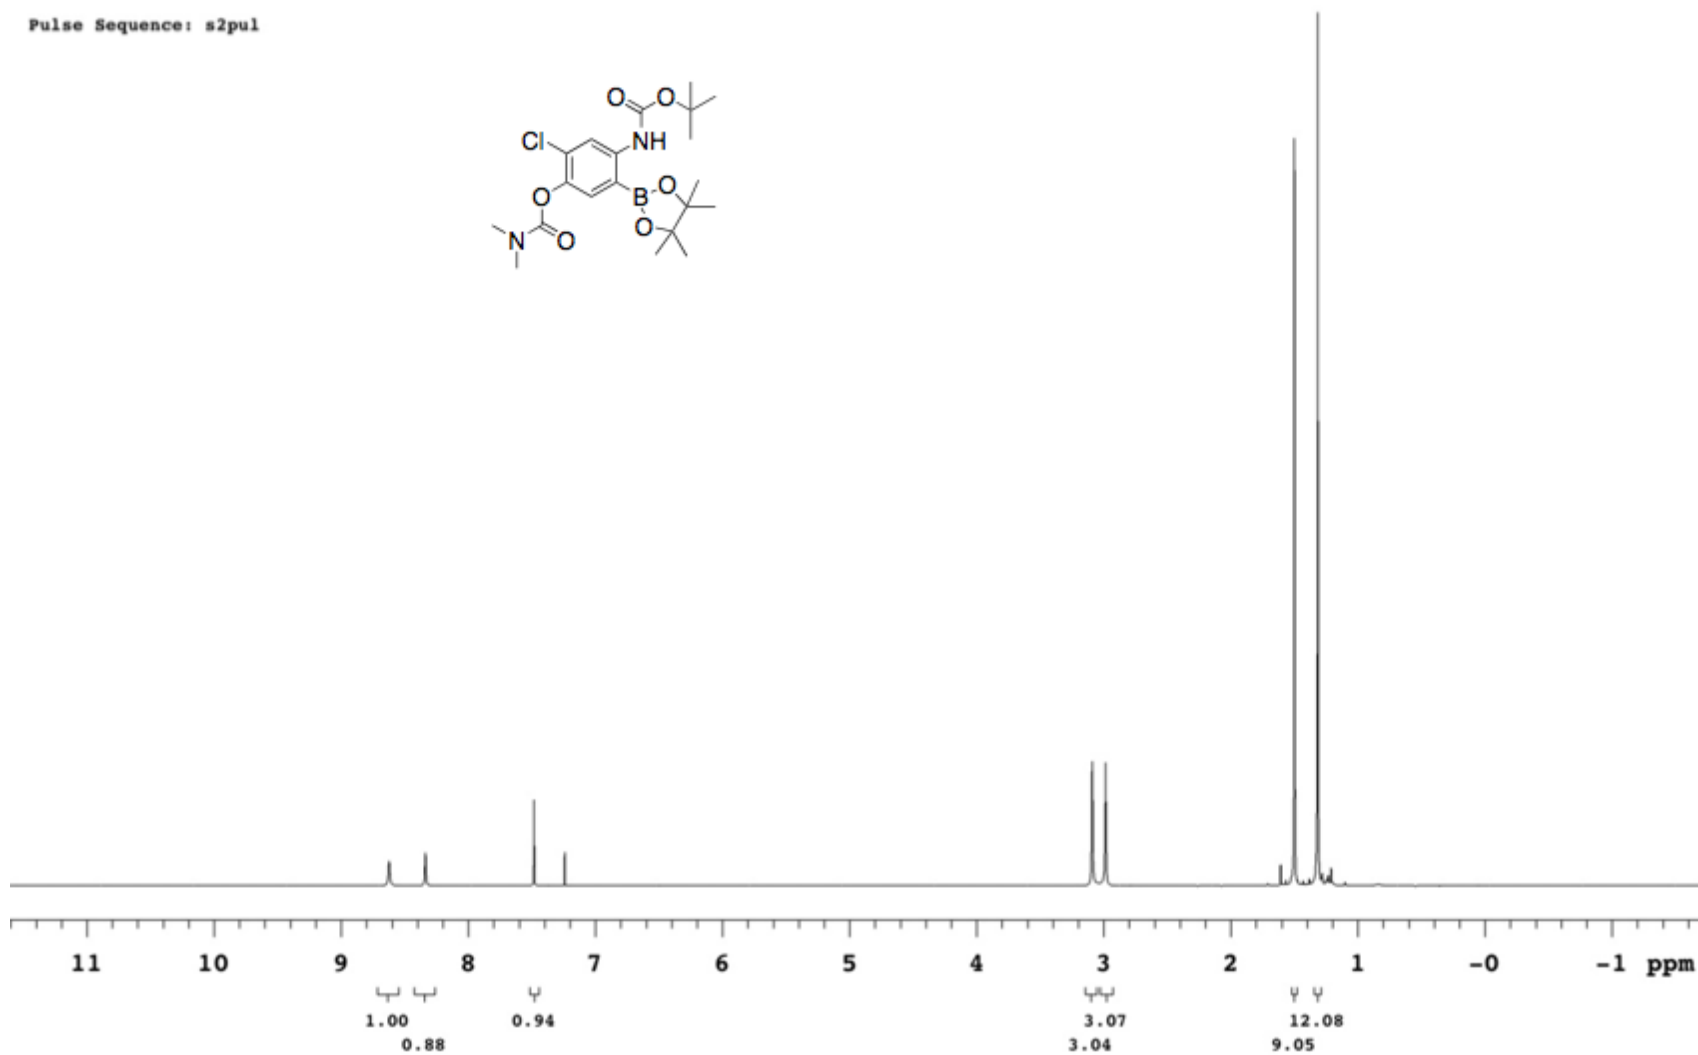

**Figure.** 300 MHz <sup>1</sup>H NMR spectrum of Table 1, entry 10

75MHz CDCl3=77p 13C  
O-(CONMe2)-N-(Boc)-2-Cl-5-BPin-4-aminophenol  
Pulse Sequence: s2pul

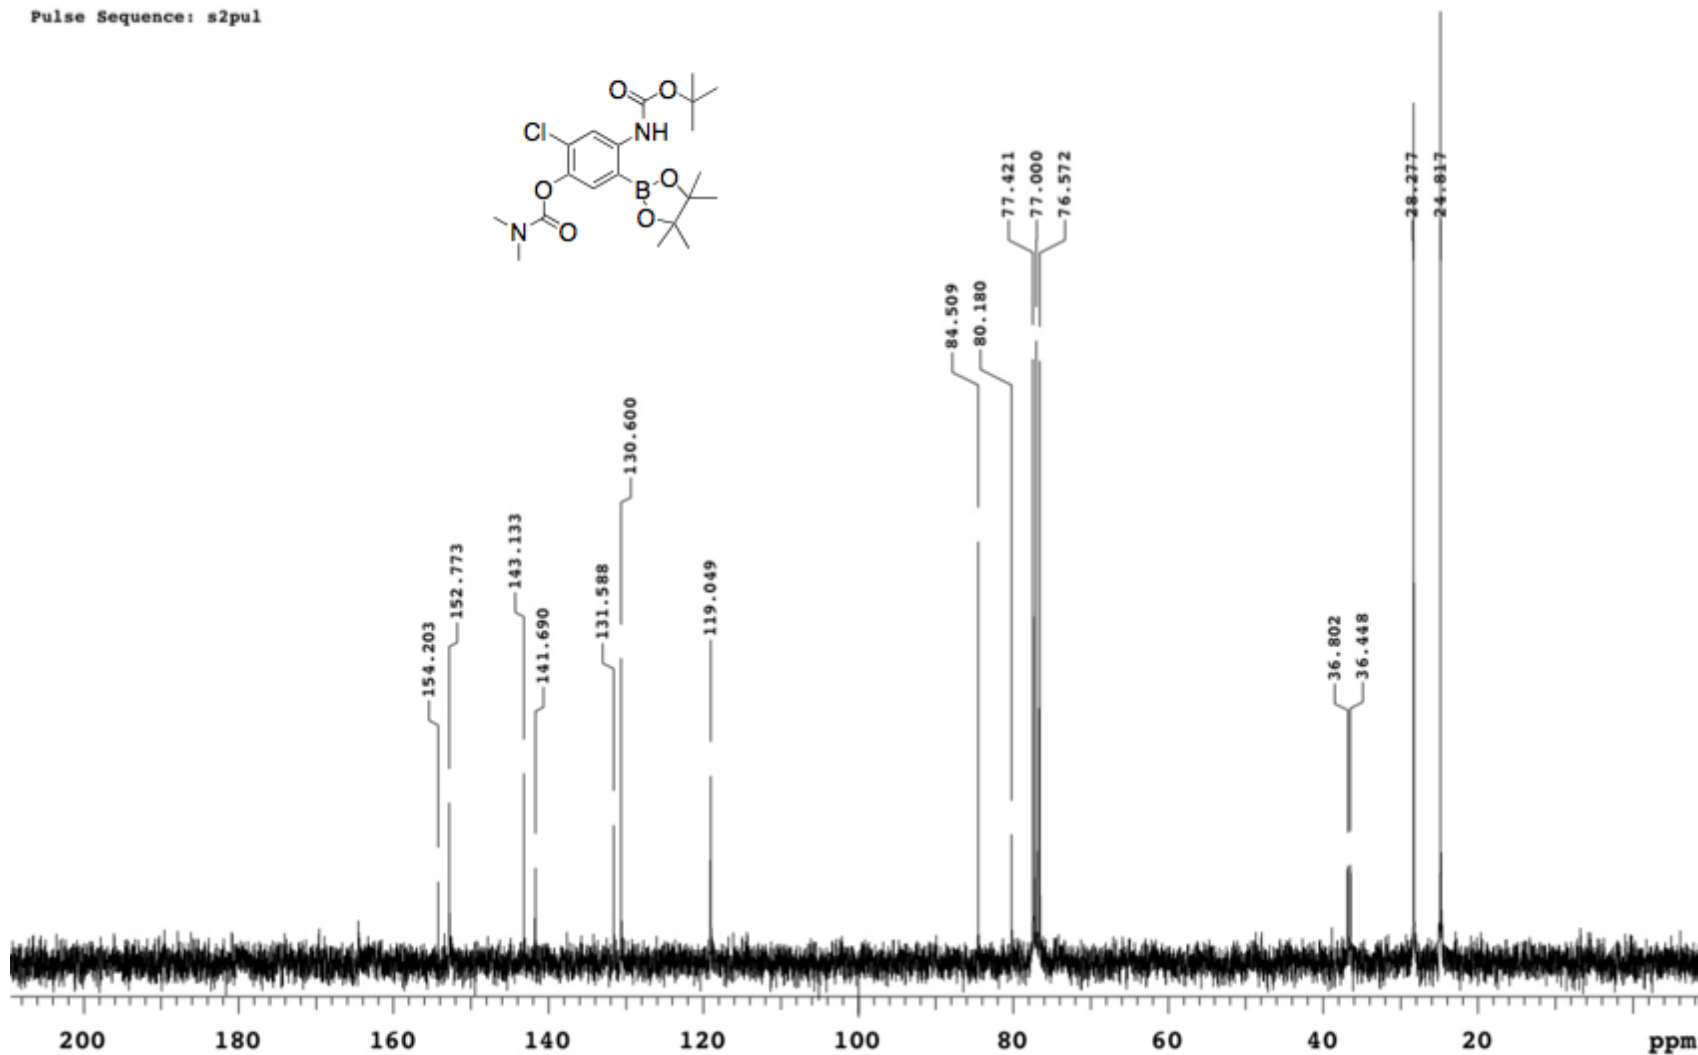

Figure. 75 MHz <sup>13</sup>C NMR spectrum of Table 1, entry 10

500MHz CDCl<sub>3</sub>=7.24p 1H  
N-Boc-3-BPin-4-aminobenzonitrile

Pulse Sequence: s2pul

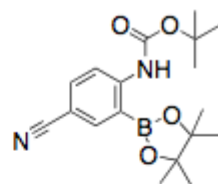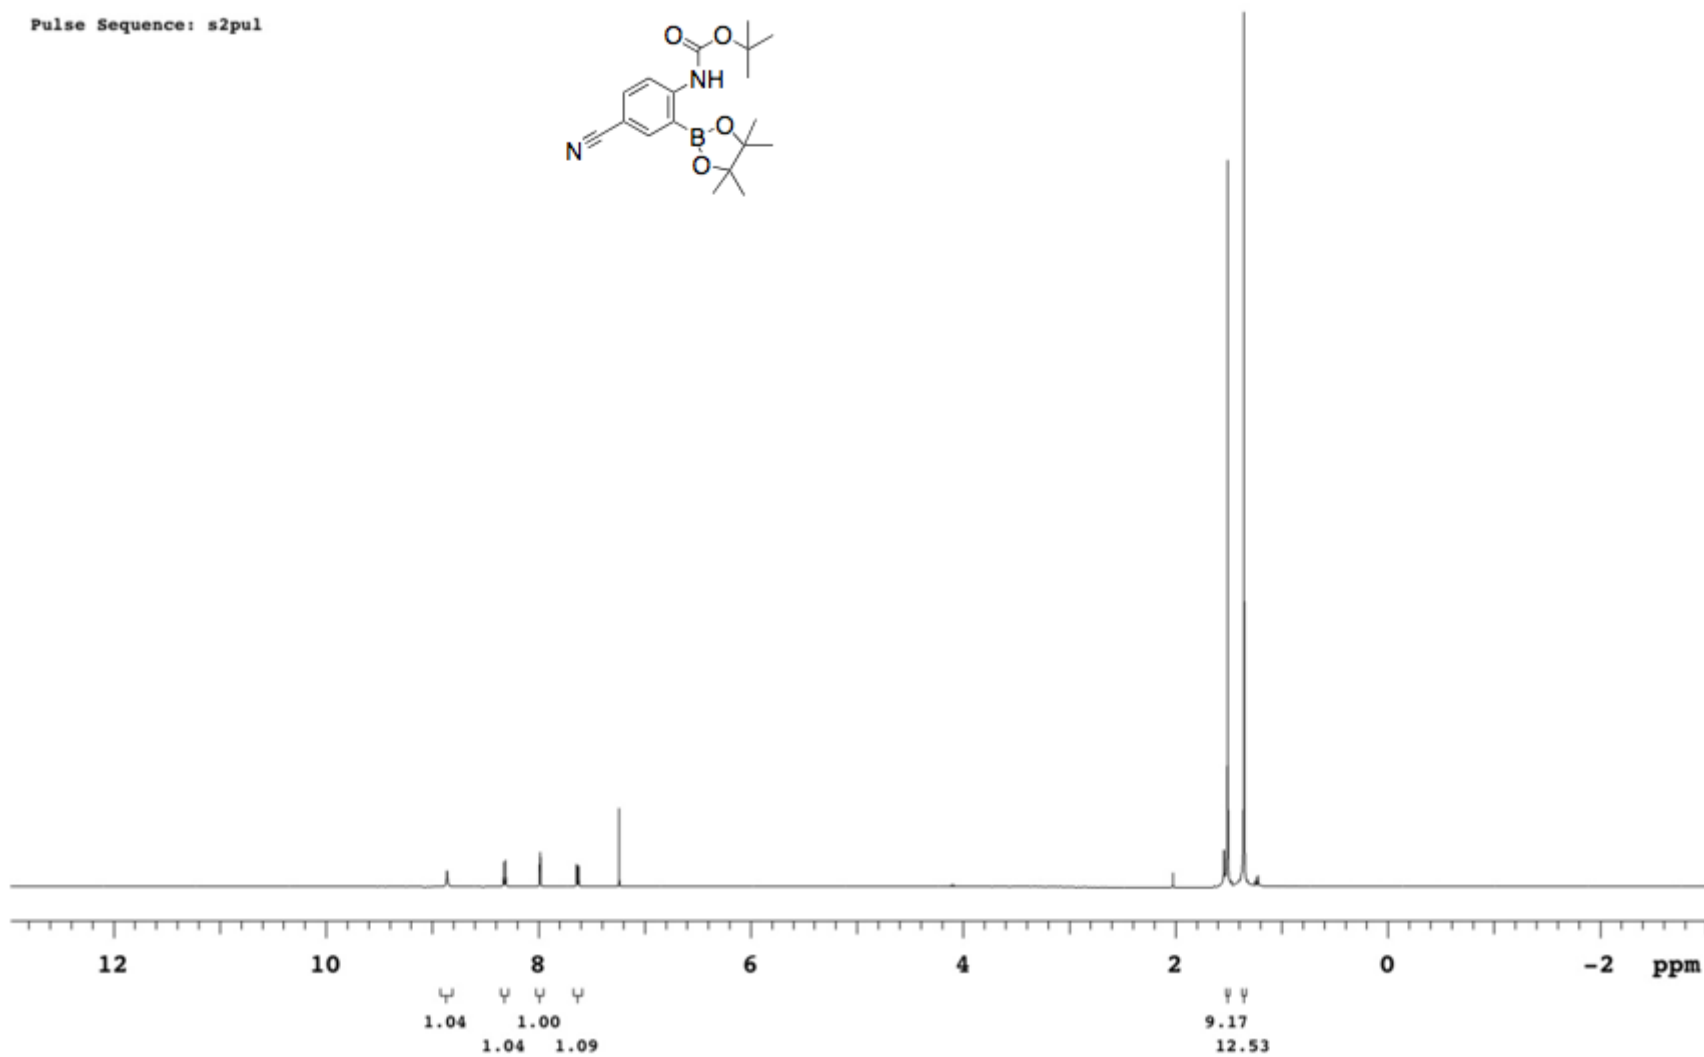

*Figure.* 500 MHz <sup>1</sup>H NMR spectrum of Table 1, entry 11

126MHz CDCl<sub>3</sub>=77p 13C  
N-Boc-3-BPin-4-aminobenzonitrile

Pulse Sequence: s2pul

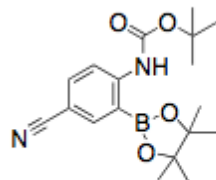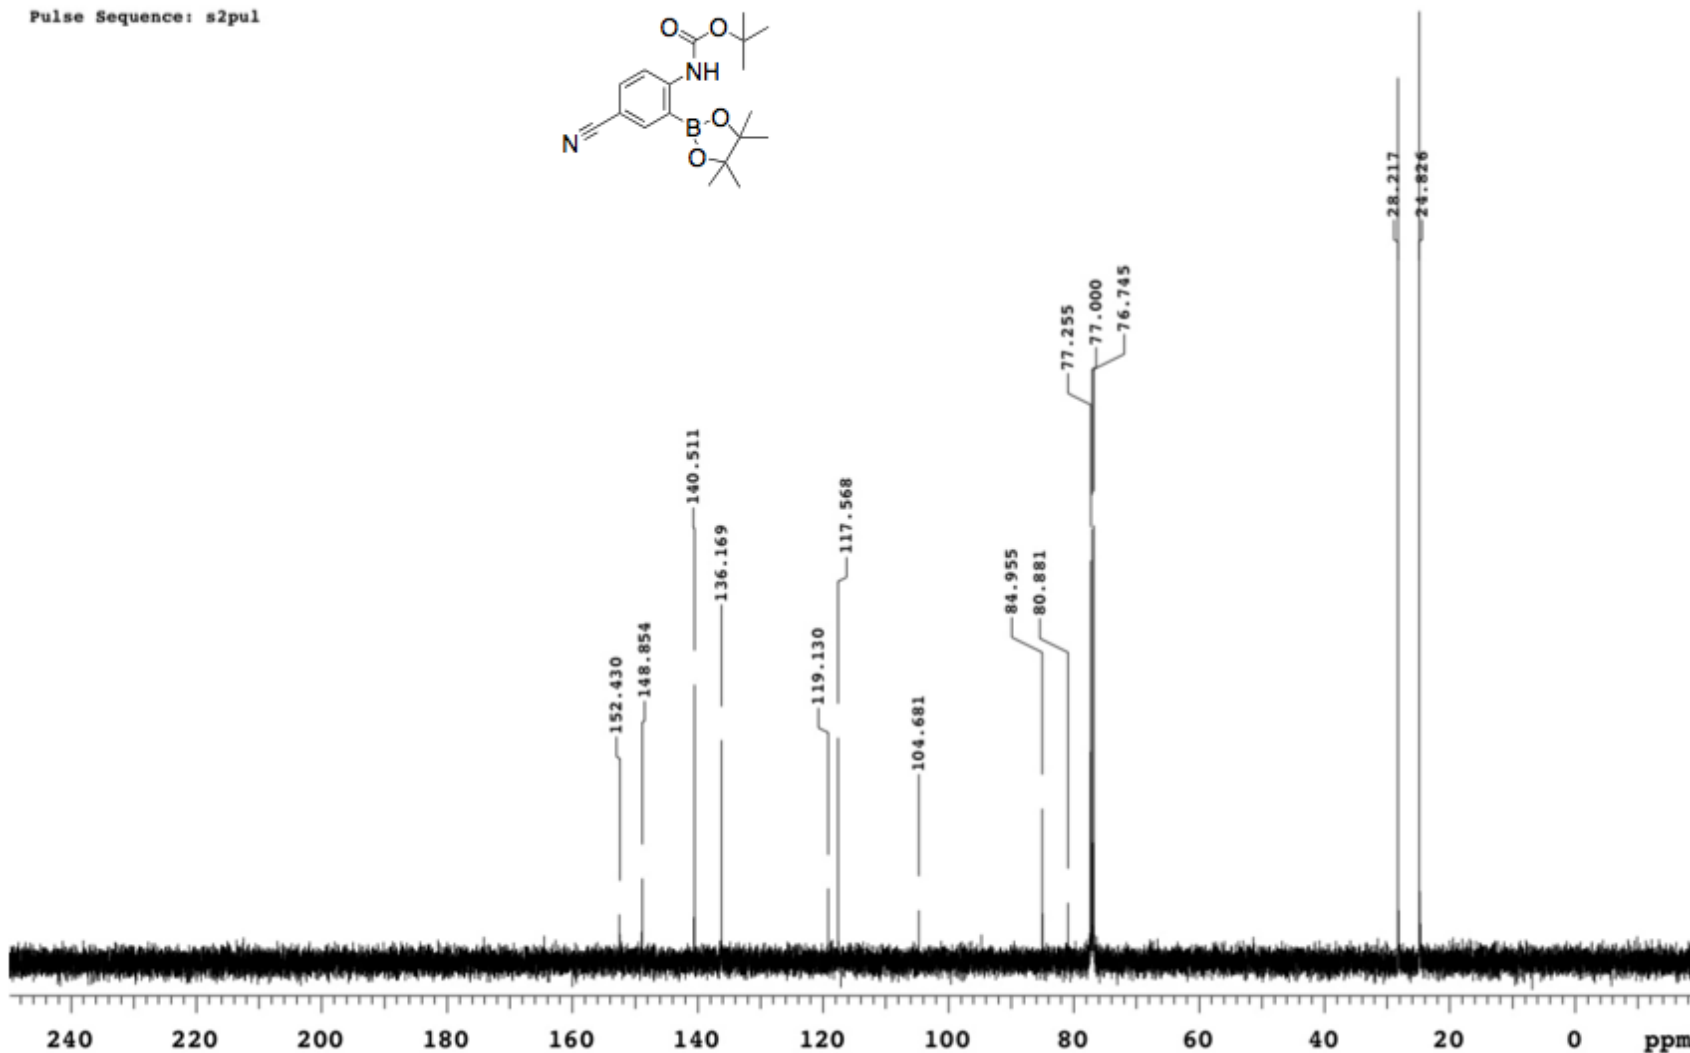

Figure. 126 MHz <sup>13</sup>C NMR spectrum of Table 1, entry 11

300MHz CDCl3=7.24p nOe  
nt=2000  
N-(Boc)-4-CN-2-BPin-aniline

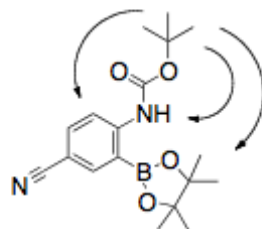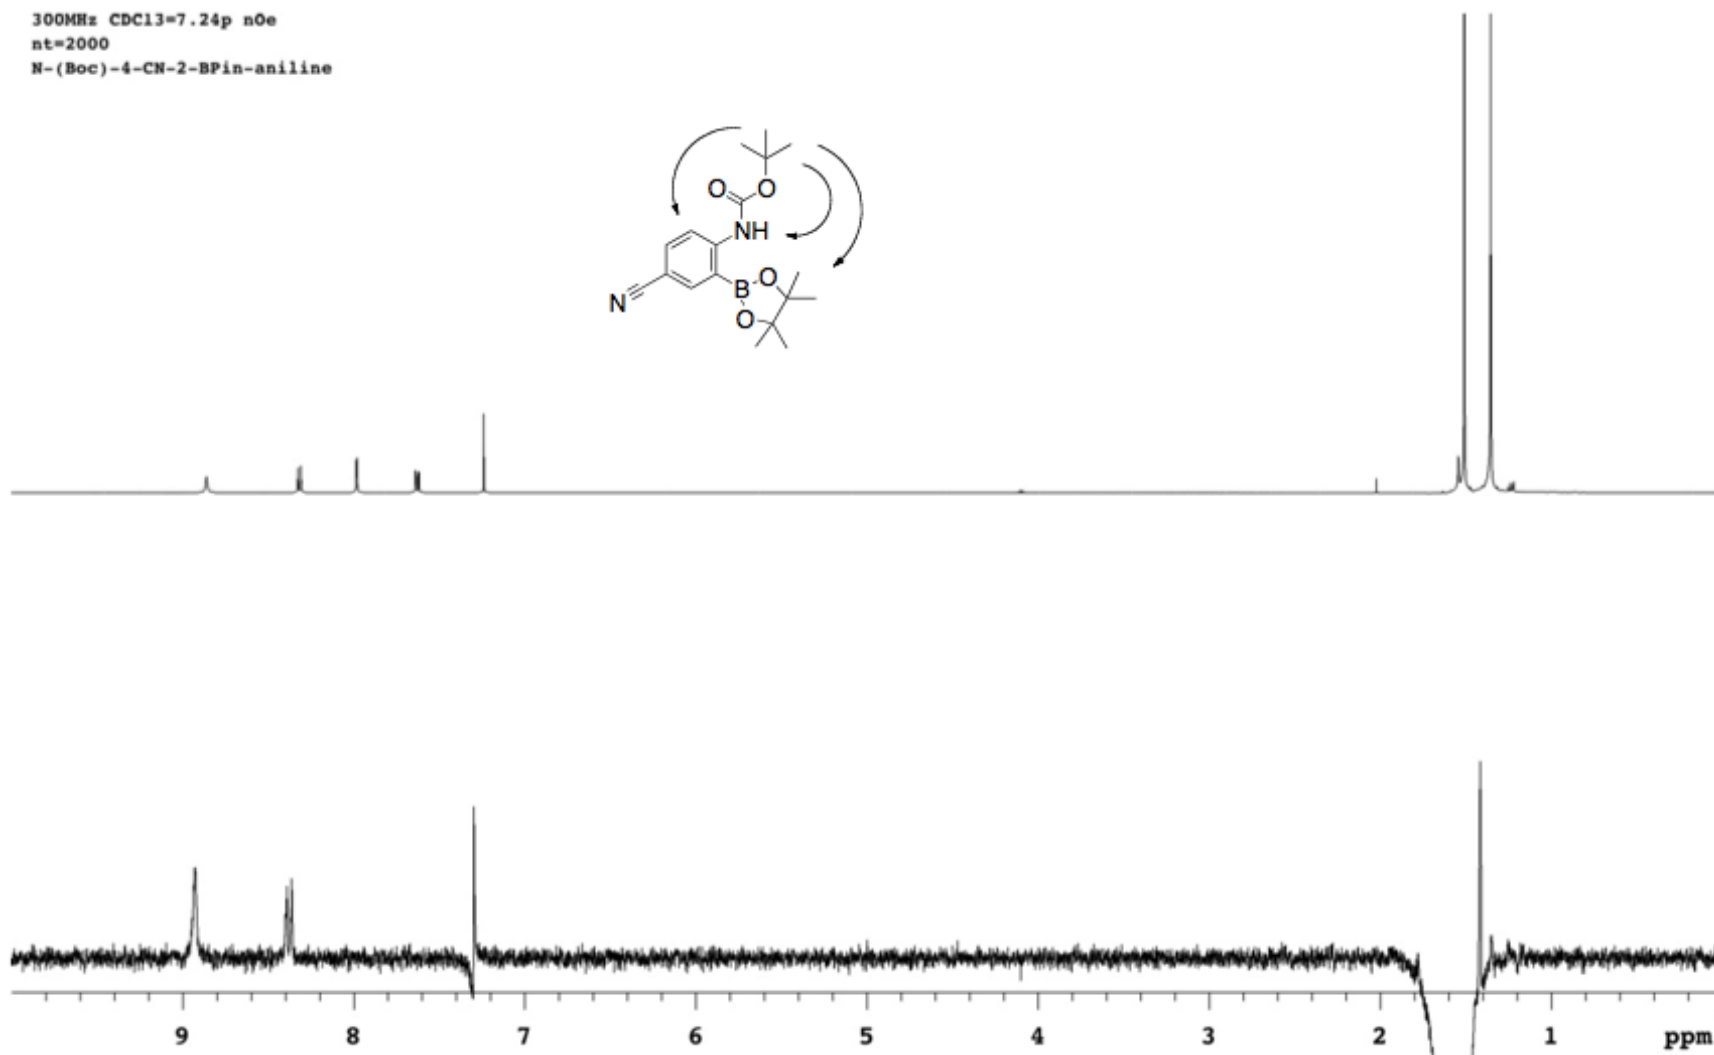

*Figure.* 300 MHz nOe NMR spectrum of Table 1, entry 11



300MHz CDCl3=7.24p nOe  
nt=2000  
N-(Boc)-4-CN-2-BPin-aniline

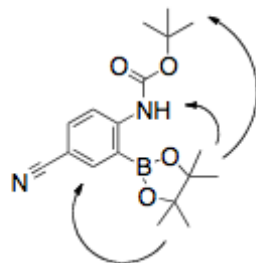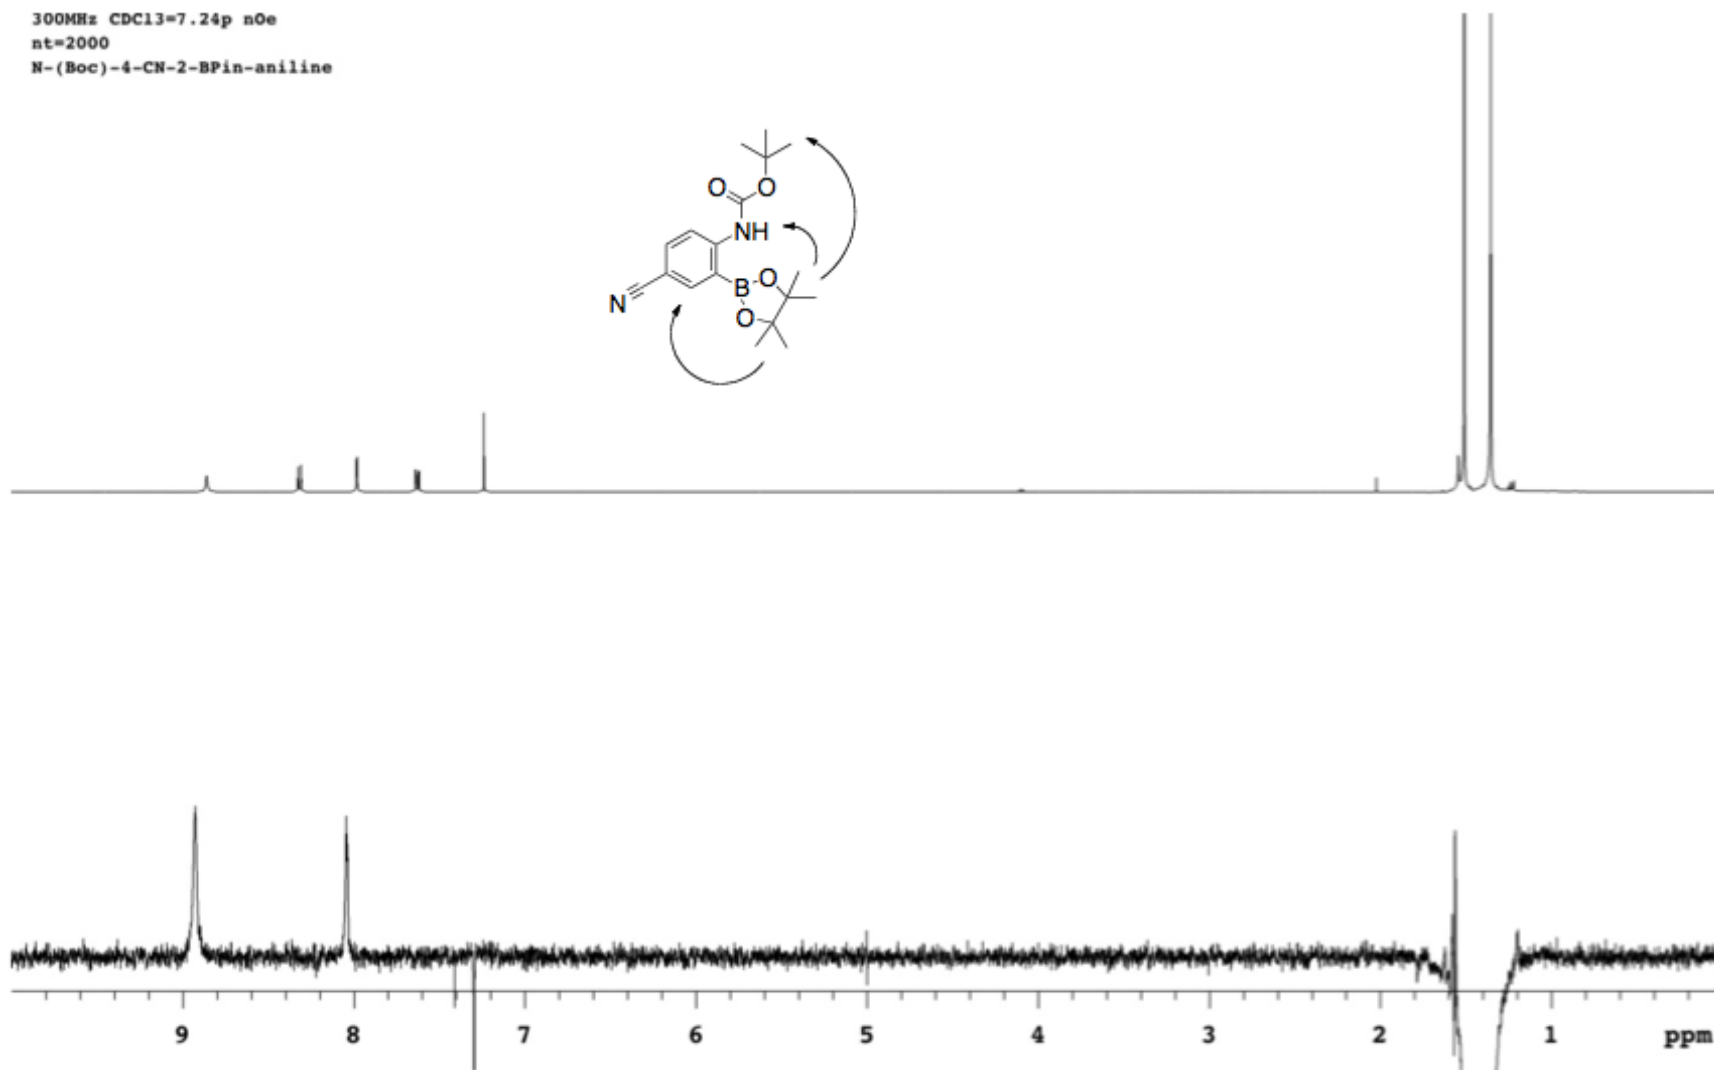

*Figure.* 300 MHz nOe NMR spectrum of **Table 1, entry 11**

500MHz CDCl<sub>3</sub>=7.24p 1H  
4-NHBoc-3-BF<sub>3</sub>K-benzonitrile

Pulse Sequence: s2pul

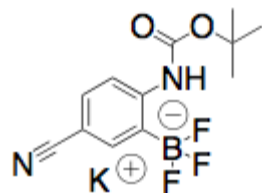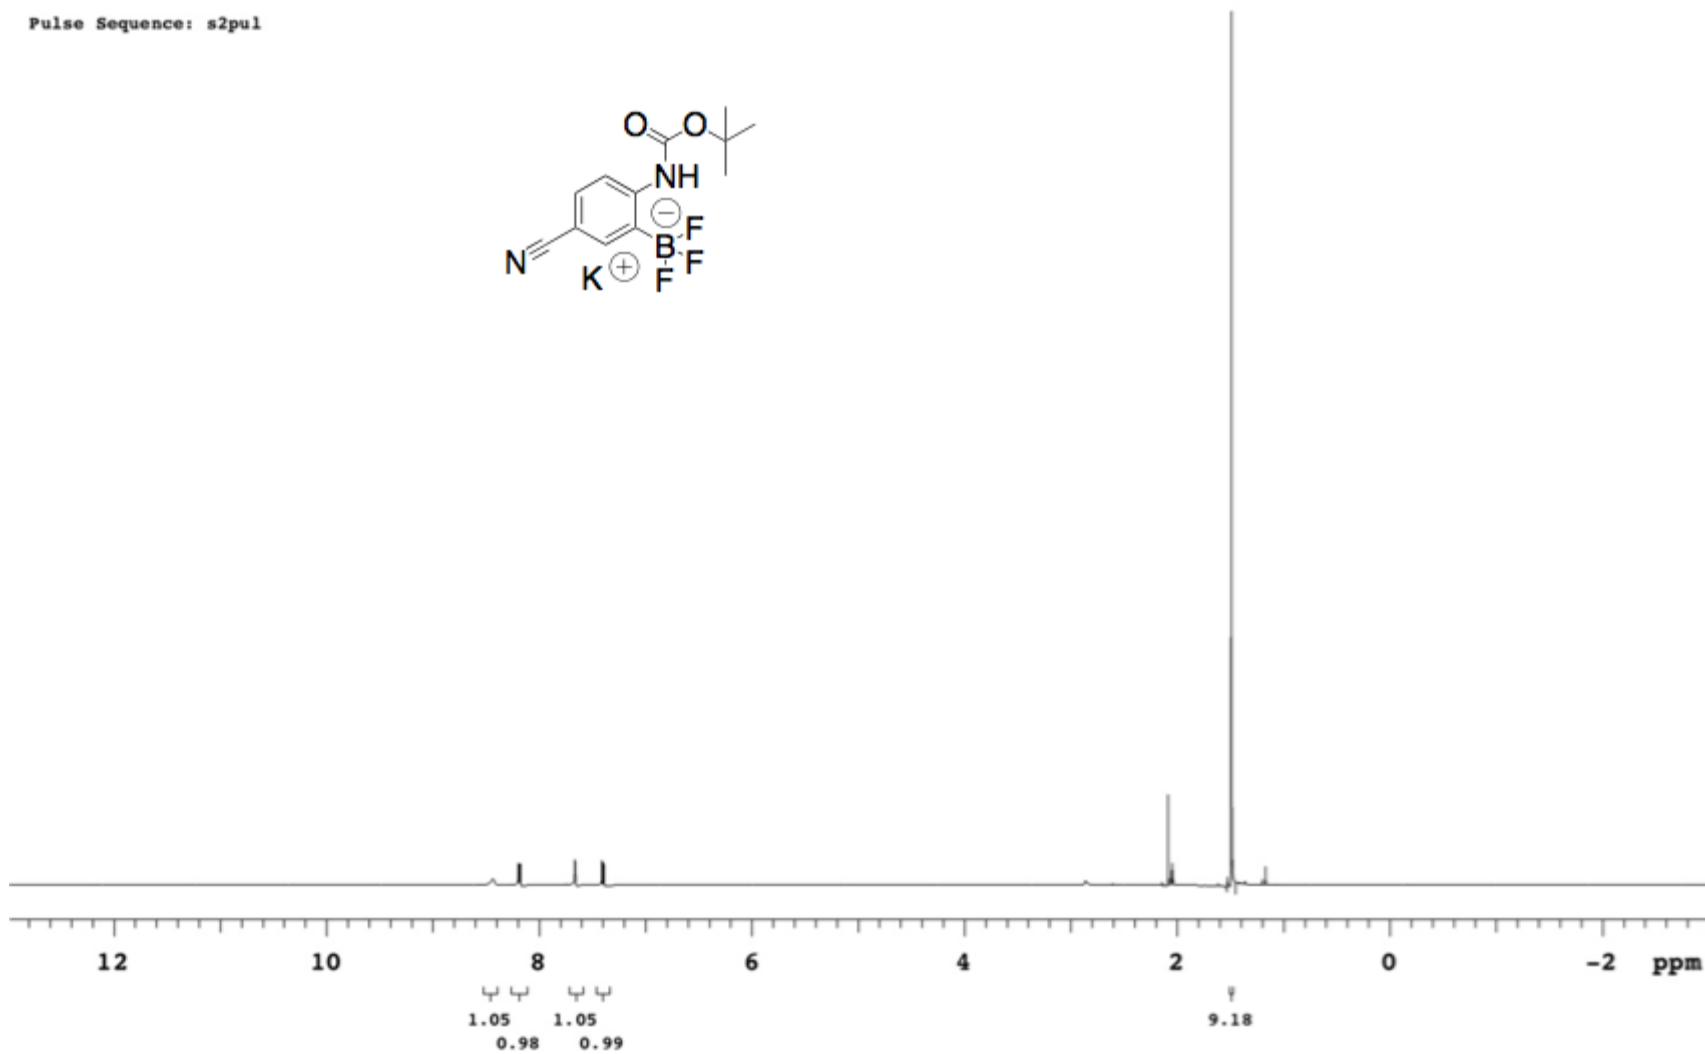

*Figure.* 500 MHz <sup>1</sup>H NMR spectrum of **Table 1, entry 12**

126MHz CDCl3=77p 13C  
4-NHBoc-3-BF3K-benzonitrile

Pulse Sequence: s2pul

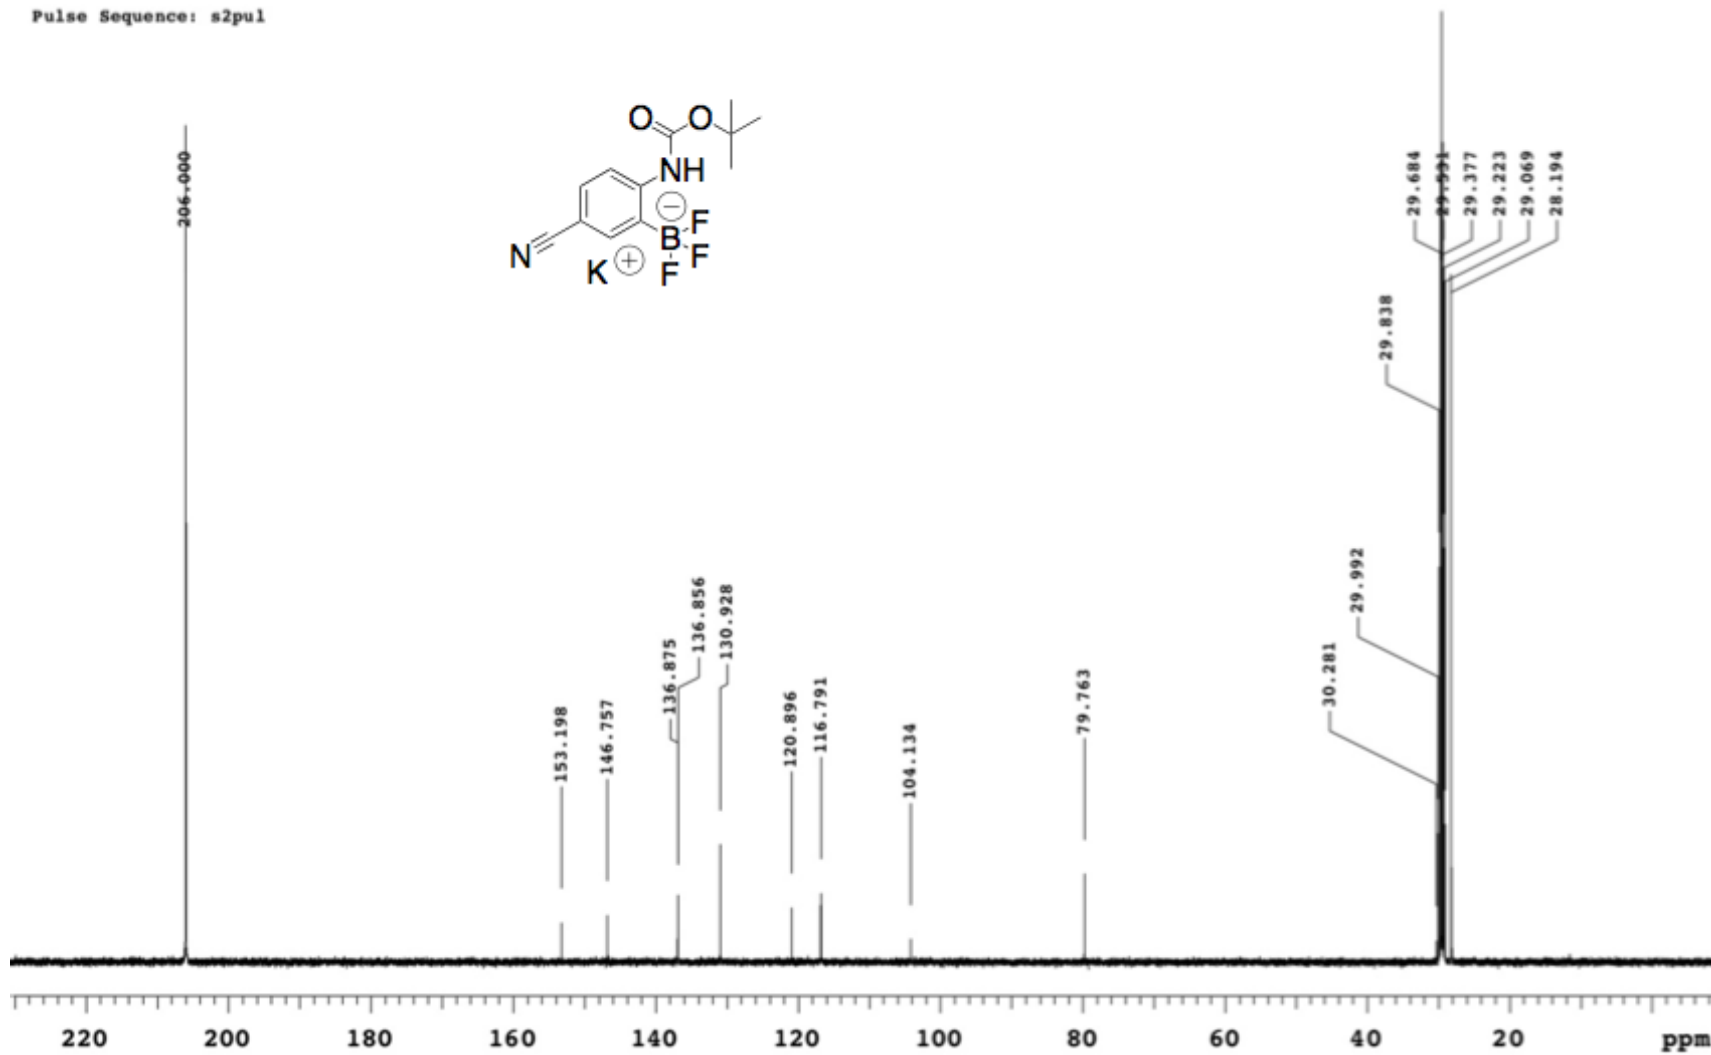

Figure. 126 MHz  $^{13}\text{C}$  NMR spectrum of Table 1, entry 12

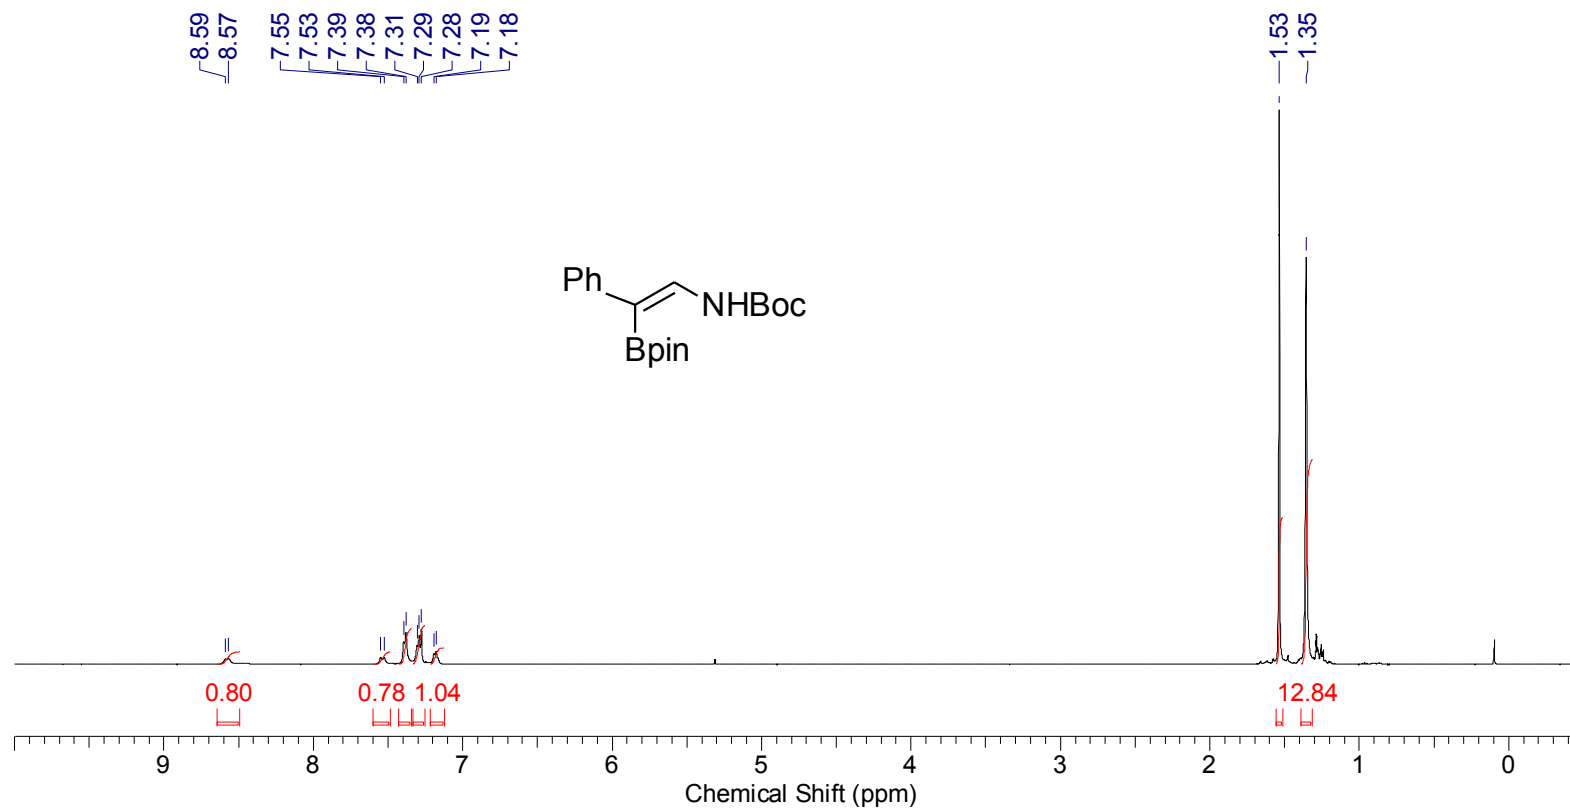

*Figure.* 500 MHz  $^1\text{H}$  NMR spectrum of **21**

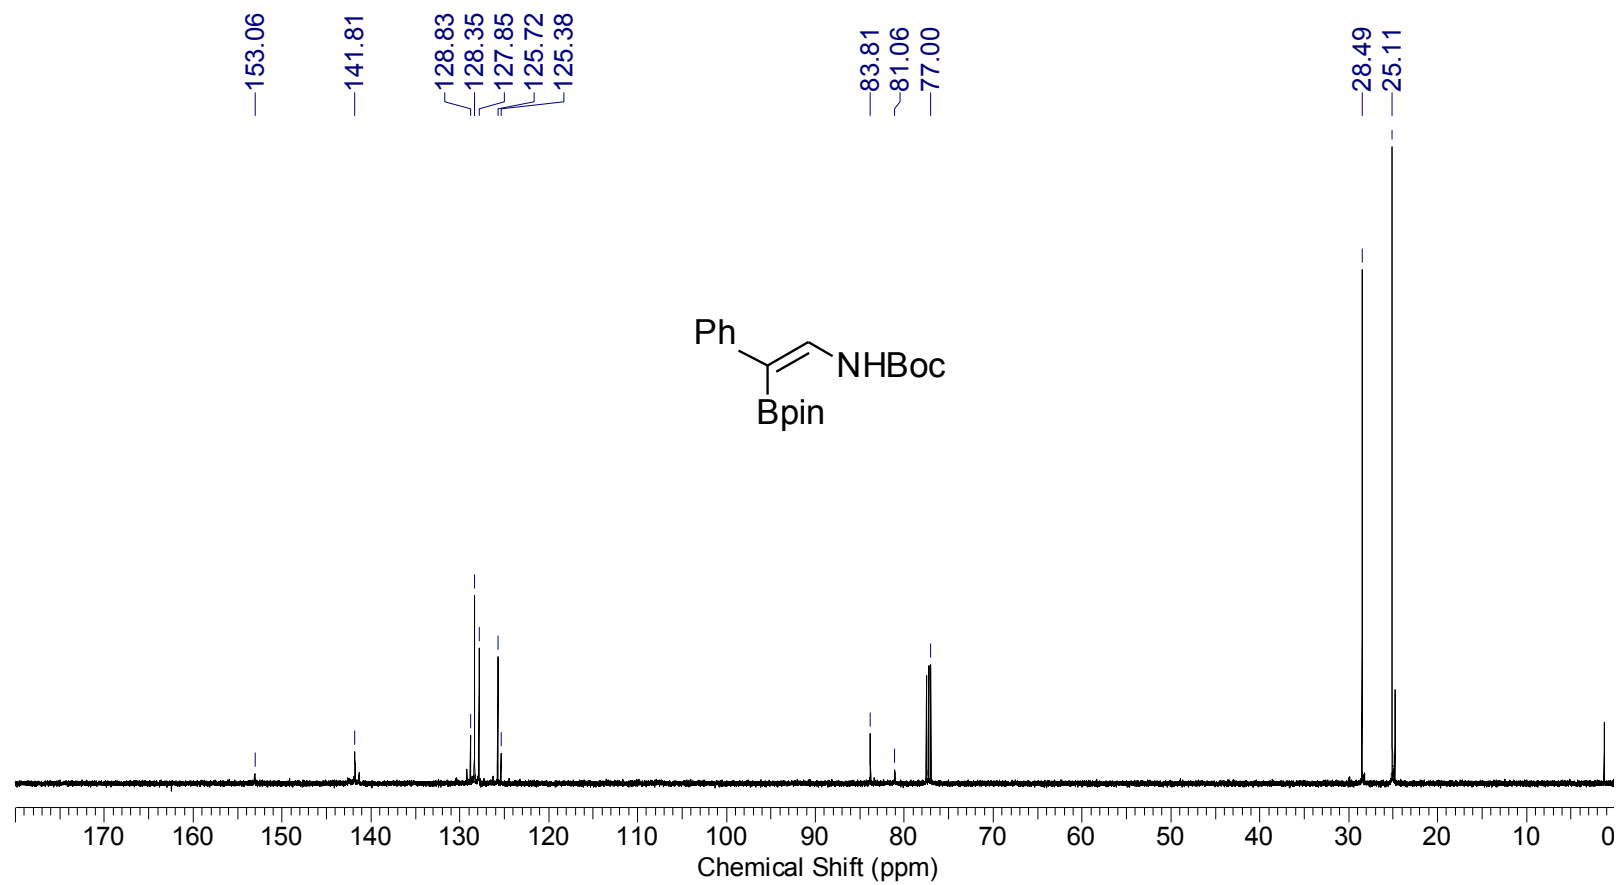

**Figure.** 126 MHz  $^{13}\text{C}$  NMR spectrum of **21**

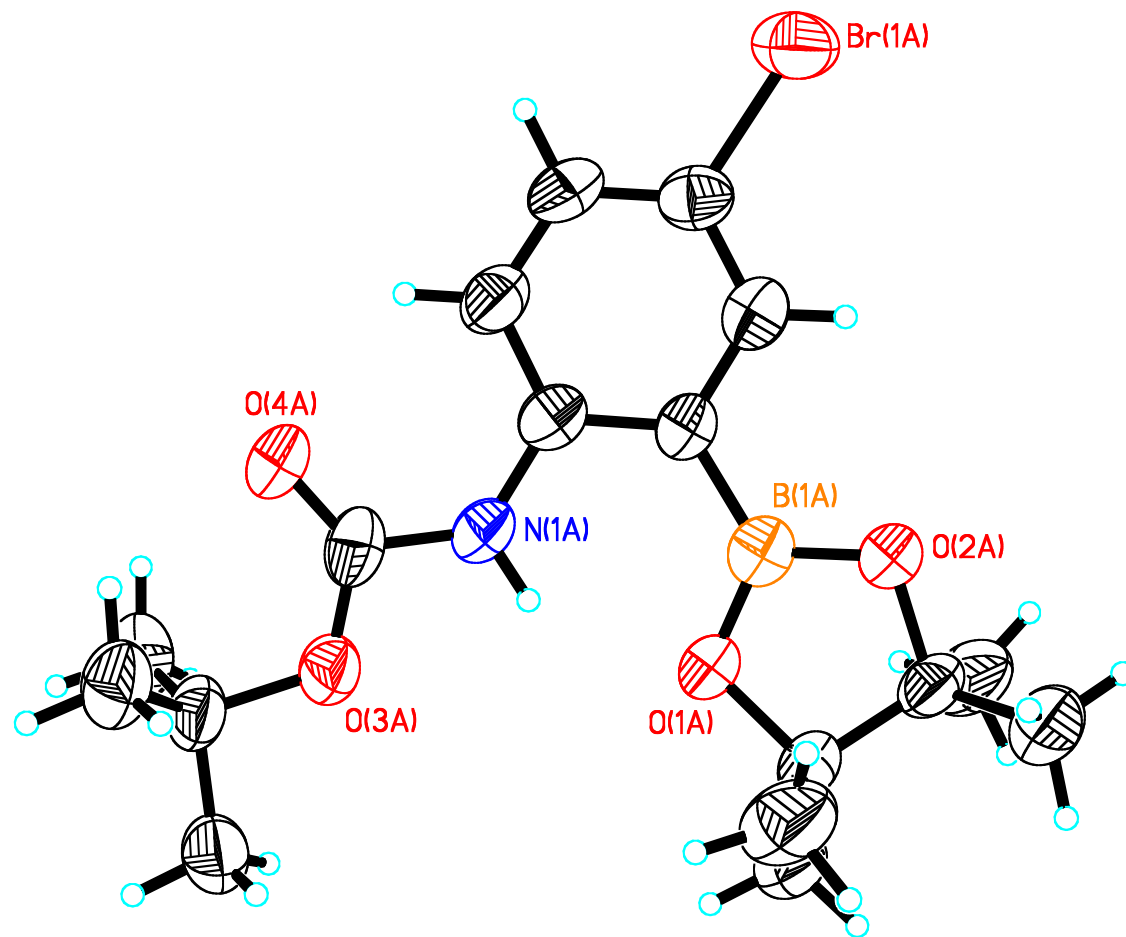

*Figure.* X-Ray structure of **Table 1**, entry **4**

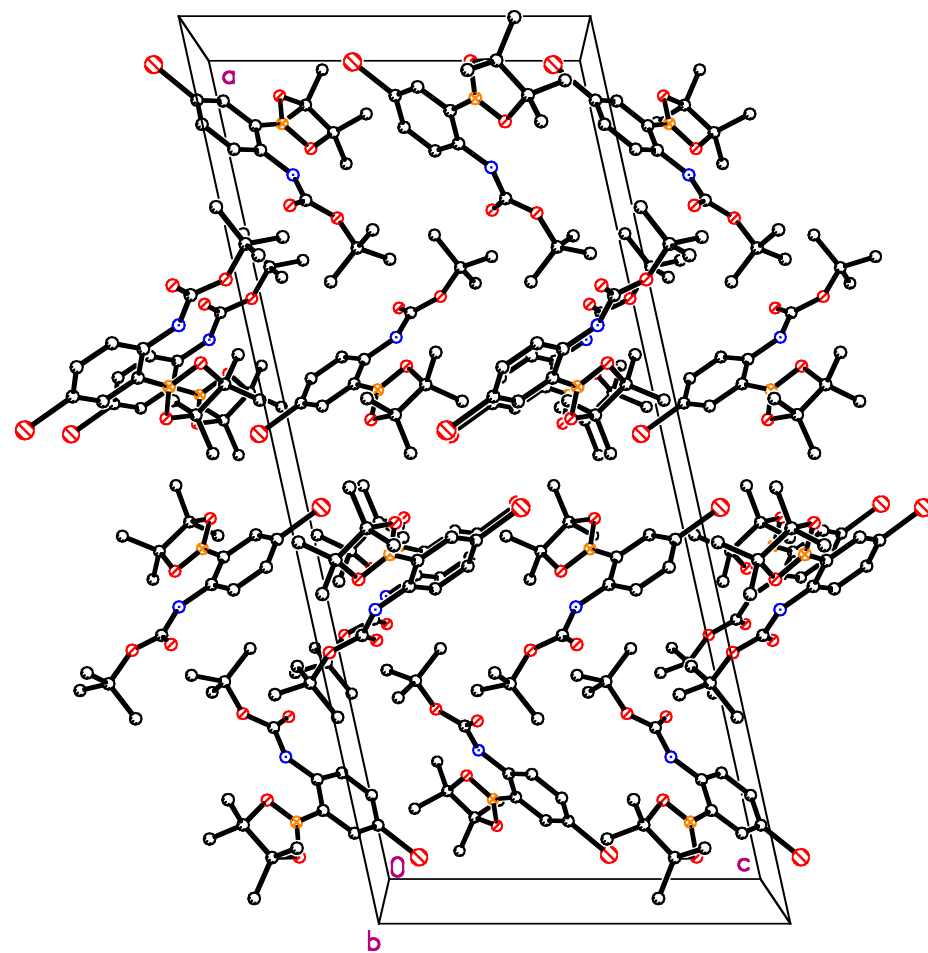

*Figure.* X-Ray packing structure of **Table 1, entry 4**

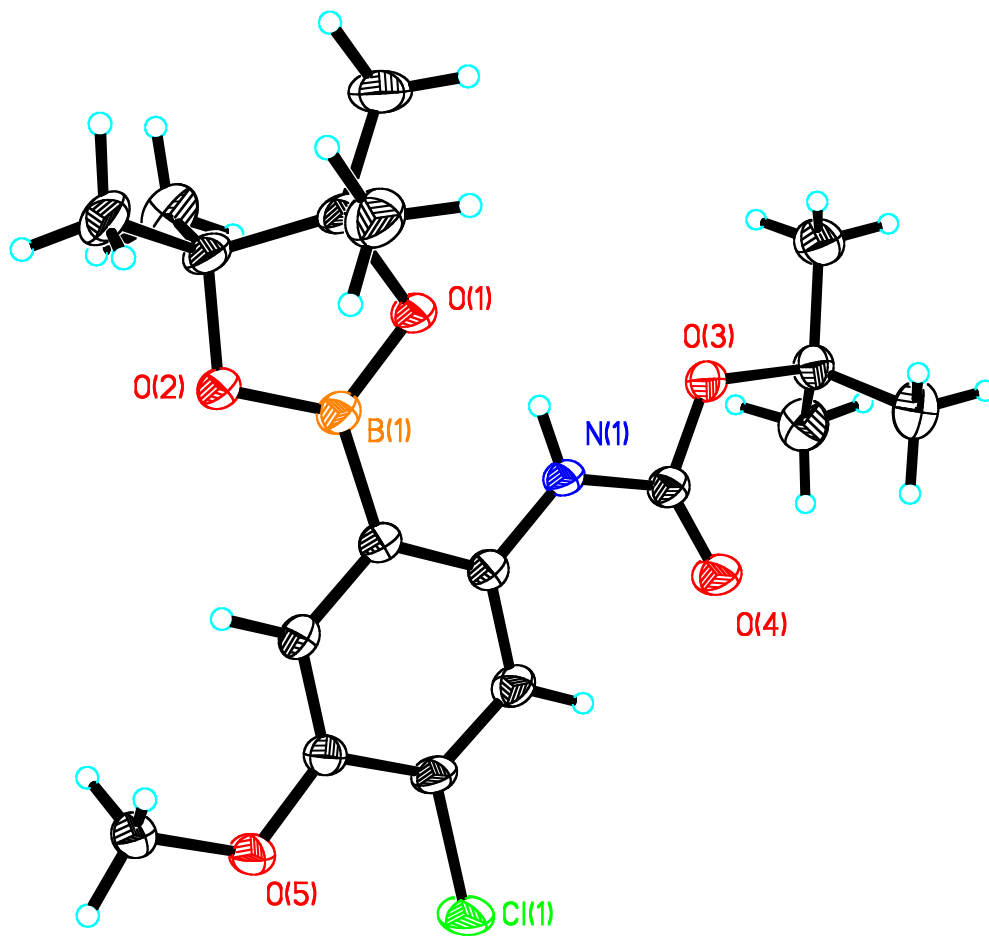

*Figure.* X-Ray structure of Table 1, entry 7



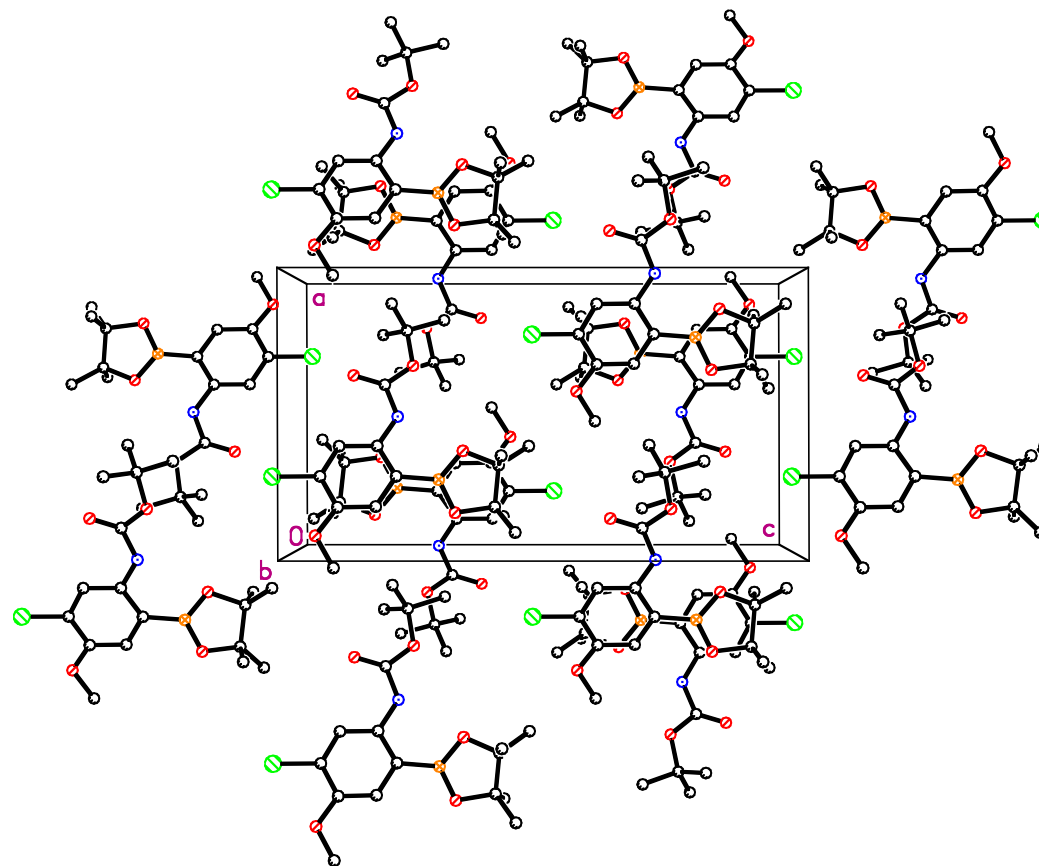

*Figure.* X-Ray packing structure of **Table 1, entry 7**



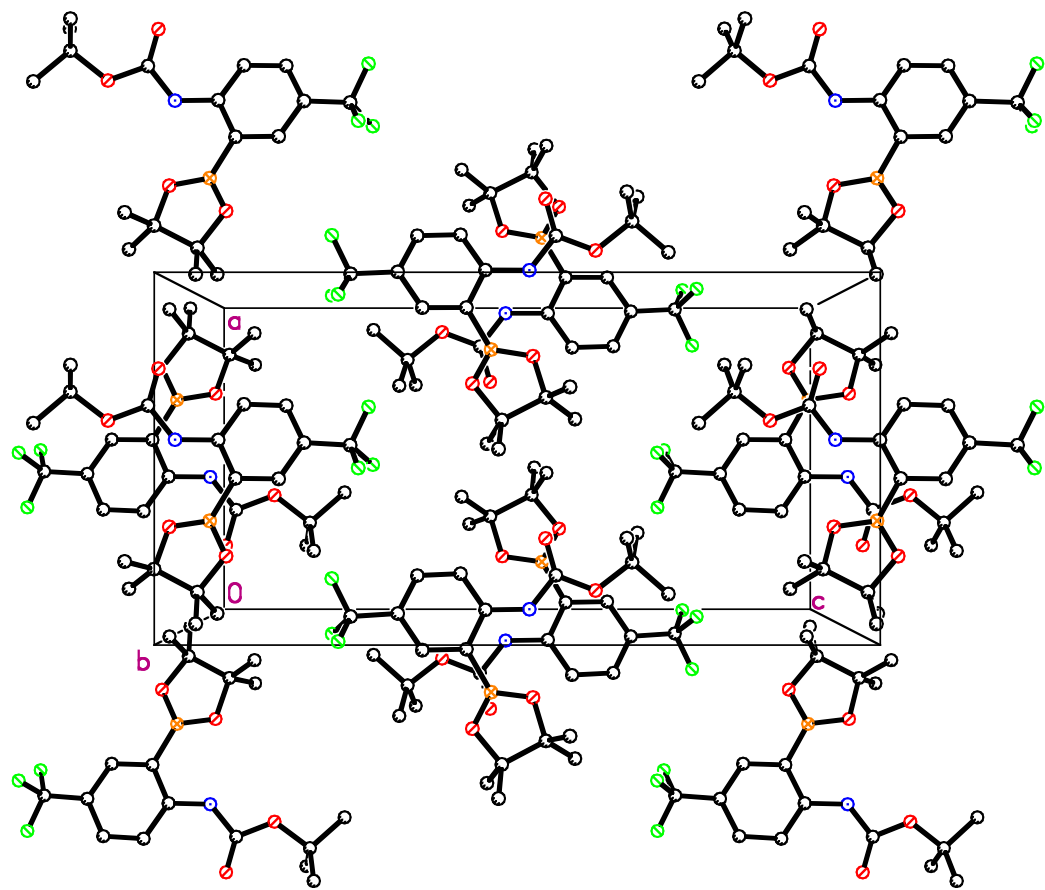

*Figure.* X-Ray packing structure of **Table 1, entry 8**

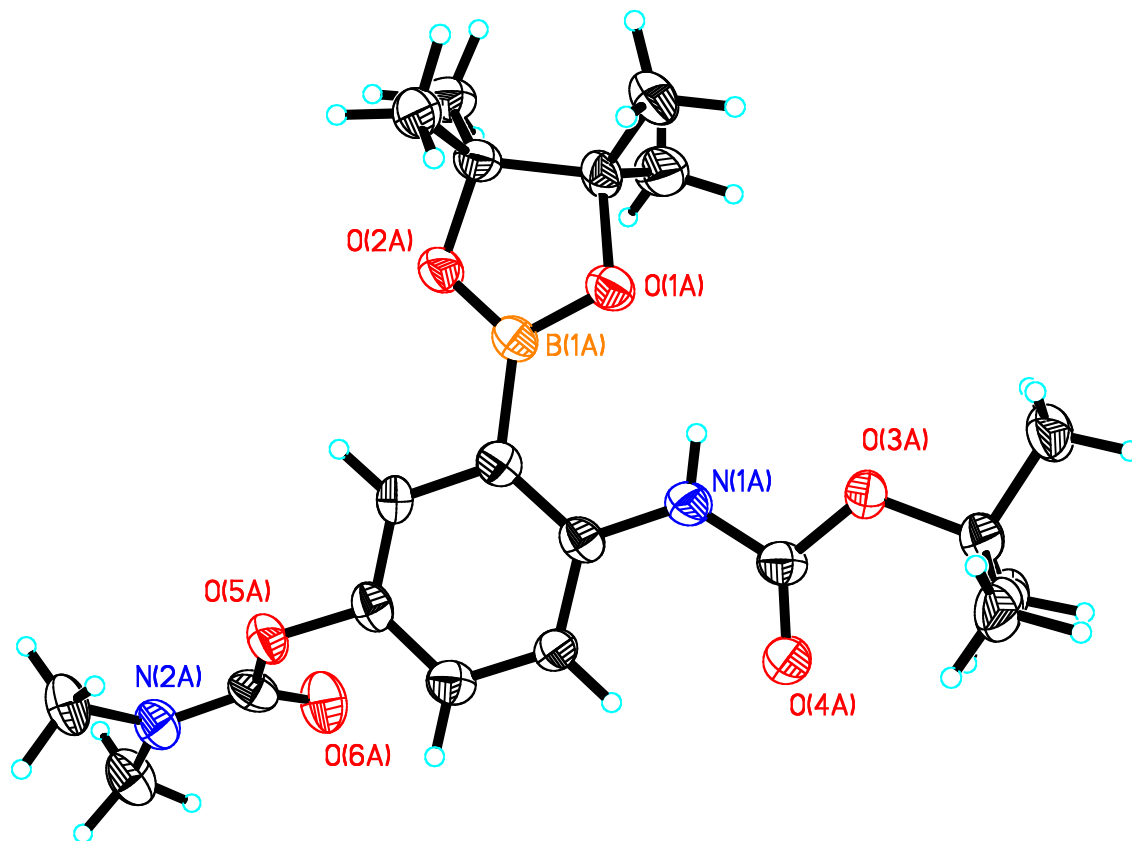

*Figure.* X-Ray structure of Table 1, entry 9

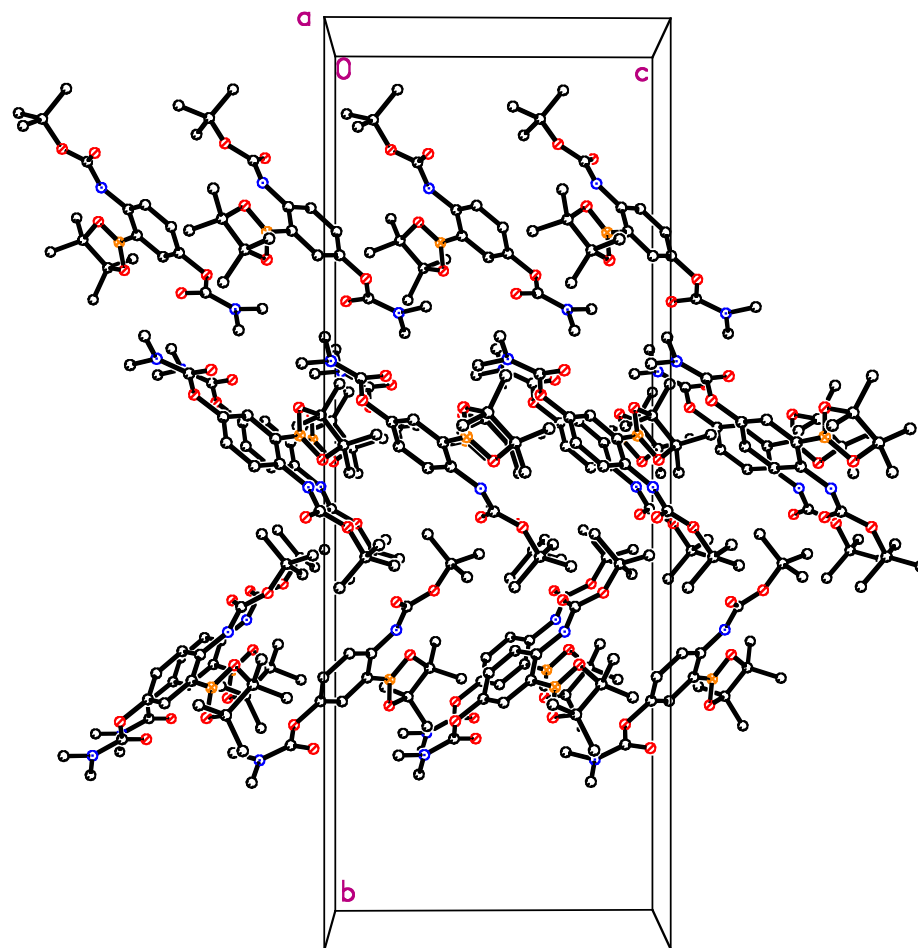

*Figure.* X-Ray packing structure of **Table 1, entry 9**

## Theoretical Methods

### General

The structures and energies for all stationary points were obtained using Gaussian 09.<sup>15</sup> Vibrational frequency analyses were carried out on all stationary points. Default methods were employed unless otherwise stated. As a departure from the default methods, frequency calculations were carried out with the Gaussian 09 parameter `int=Acc2E=11`.

### Choice of Methods and Method Details

We have previously described our exploration of diverse combinations of functionals and basis sets for iridium-mediated C-H activations (reference 6b in the main text), including the use of very large basis sets in single-point calculations. We subsequently found that M06 calculations employing an SDD basis set and core potential on Ir and a 6-31+G\*\* basis set of the remaining atoms led to barriers that were closely consistent with the observed rates of reactions (this is not true of B3LYP calculations) and predicted selectivities that were closely consistent observed regioselectivities for the reactions is reference 6b. Because of this and because of the broader success of M06 calculations in transition metal catalyzed reactions, we have adopted these calculations for the reactions studied here.

The calculations assume the general mechanism calculated by Sakaki and coworkers (H. Tamura, H. Yamazaki, H. Sato and S. Sakaki, *J. Am. Chem. Soc.*, **2003**, *125*, 16114–16126) and the transition structures located here are closely analogous to those found by Sakaki for the reaction of benzene. In our previous work in reference 6b, a broad series of transition structures analogous to those of Sakaki exhibited energetics that fit well with experimental observations. Similar transition structures have been found by other workers (Liskey, C. W., Wei C. S., Pahls, D. R., Hartwig J. F. “Pronounced Effects of Substituents on the Iridium-Catalyzed Borylation of Aryl C–H Bonds” *Chem. Commun.* **2009**, 5603-5605.)

### Some Complications in the Calculations

A significant issue that arose in the calculation of the transition structures was the difficulty of fully and tightly optimizing the transition structures and the effect of this difficulty on the frequency calculations and the entropy of the complexes. In particular, with the structure “bybpin3BOCmetaA,” it was possible to obtain structures where the maximum forces and RMS forces on the atoms were barely within normal Gaussian 09 convergence criteria, but with extensive effort it was not possible to obtain any structure where the maximum and RMS displacement of the atoms per step during the optimization was within the convergence criteria. When frequency calculations were carried out on a series of four very similar bybpin3BOCmeta structures with acceptable maximum and RMS forces, either more than one imaginary frequency was found (three cases) or the structure had multiple very low frequencies (one case). The latter structure is given below, but due to its low frequencies, its entropy is high and its calculated free energy is lower than any other structure in the series. It should be noted that this structure has a relatively high potential energy and energy including zero-point energy. We have accordingly discounted the free energy of this structure as an anomaly.

We view the assignment of this free energy as anomalous as correct, but it should be admitted that this assignment came *after* the recognition that the “predicted” product ratio including this structure was not a good fit with the experimental observations. This may be worth considering when evaluating the significance of the very good agreement of the main text’s calculated product ratio with experiment.

## Calculated Structures

The structure titles in the following section have retained the original file names for the computational output files. This lets us use a single code name for structures, energies and our records, but a problem is that the titles are relatively cryptic. "BOC" in the title refers to structures containing a methyl carbamate. Structures with "ortho", "meta", and "para" in the title are referring to the position of the C-H activation relative to the carbamate group. The various conformational possibilities are labeled A, B, C, etc. "BOC" refers to structures containing a methyl carbamate. Structures with "bpin3" in the title are calculations on structures with three Beg (eg = ethyleneglycolate) groups. The "bpy" has its usual meaning.

### bybpin3BOCmetaA

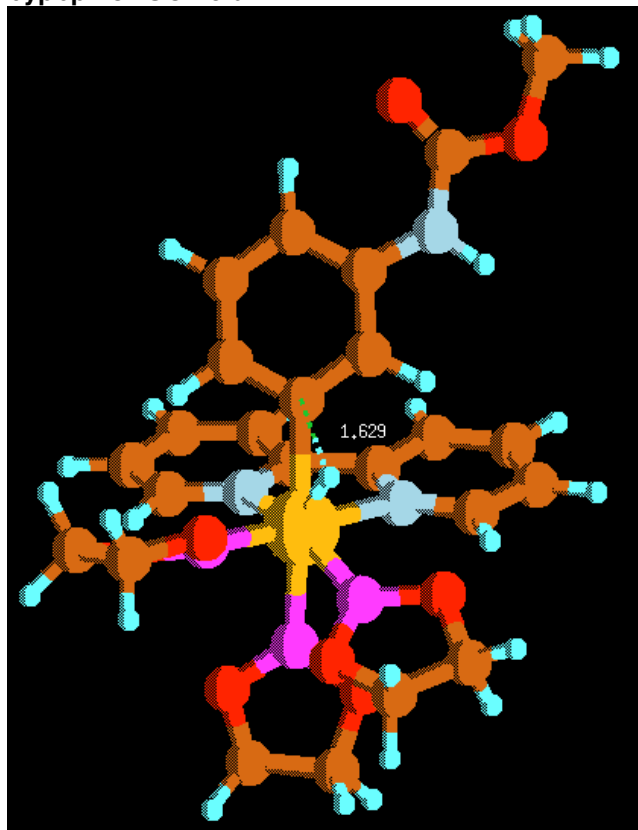

bybpin3BOCmeta  
M06/gen  
E(RM06) = -1876.24505763

Zero-point correction= 0.527173 (Hartree/Particle)  
Thermal correction to Energy= 0.564687  
Thermal correction to Enthalpy= 0.565631  
Thermal correction to Gibbs Free Energy= 0.451290  
Sum of electronic and ZPE= -1875.717884  
Sum of electronic and thermal Energies= -1875.680370  
Sum of electronic and thermal Enthalpies= -1875.679426  
Sum of electronic and thermal Free Energies= -1875.793768

| E             | CV        | S         |
|---------------|-----------|-----------|
| KCal/Mol      | Cal/Mol-K | Cal/Mol-K |
| Total 354.347 | 138.498   | 240.652   |

6 -3.639063 2.229078 -0.452533  
6 -2.490643 2.998594 -0.276167  
6 -1.217503 2.442494 -0.358212  
6 -1.051500 1.069008 -0.593349  
6 -2.205567 0.312164 -0.808795  
6 -3.486880 0.869980 -0.730410  
77 0.897830 0.107564 -0.170847  
7 -0.289821 -1.724120 0.587453  
6 -0.879662 -1.583490 1.788192  
6 -1.799204 -2.526469 2.253878  
6 -2.092908 -3.632828 1.468735  
6 -1.451887 -3.782715 0.243866  
6 -0.554374 -2.800670 -0.158914  
6 -0.481117 -0.395818 2.575780  
7 0.395244 0.448786 1.993029  
6 0.846706 1.509861 2.672441  
6 0.425617 1.796287 3.964896  
6 -0.494018 0.948418 4.569181  
6 -0.946305 -0.162138 3.870600  
5 2.707381 -0.797071 0.482415  
8 2.998720 -2.153177 0.310504  
6 4.364525 -2.344114 0.655850  
6 4.683858 -1.154538 1.555654  
8 3.727790 -0.171514 1.177257  
5 1.869749 -0.745184 -1.777795  
8 3.124725 -0.436969 -2.283918  
6 3.385209 -1.280470 -3.394723  
6 2.368030 -2.410598 -3.249975  
8 1.332690 -1.841020 -2.458850  
5 1.910740 1.805379 -0.635294  
8 2.484628 2.666509 0.305356  
6 2.825479 3.881570 -0.348585  
6 2.830336 3.514690 -1.830805  
8 1.997736 2.370250 -1.902318  
1 0.128967 0.491057 -1.555528  
1 -0.026632 -2.845100 -1.111822  
1 -2.289276 -2.401434 3.214622  
1 -1.643381 -4.639337 -0.395880  
1 -2.811525 -4.371587 1.815250  
1 -1.654035 -0.840671 4.336258  
1 -0.853095 1.142487 5.576834  
1 0.815543 2.670624 4.477470  
1 1.567048 2.132167 2.142330  
1 2.793314 -3.273783 -2.714701  
1 1.959065 -2.755253 -4.206666  
1 4.423734 -1.630455 -3.358127  
1 3.243621 -0.710787 -4.324846  
1 -0.347871 3.085672 -0.220938  
1 -2.599999 4.062633 -0.071613  
1 -4.628413 2.667968 -0.389085  
1 -2.118472 -0.751570 -1.044965  
7 -4.569944 -0.006214 -0.947866  
1 4.496056 -3.315543 1.146019



```

1 4.969640 -2.329463 -0.265424
1 4.551480 -1.396256 2.620951
1 5.696225 -0.760319 1.412968
1 2.060695 4.640874 -0.119702
1 3.793617 4.242999 0.016868
1 2.432289 4.307700 -2.474598
1 3.838651 3.252122 -2.184458
1 -4.335094 -0.966099 -1.164509
6 -5.902952 0.273059 -0.918837
8 -6.428220 1.341210 -0.685851
8 -6.594256 -0.861165 -1.195216
6 -8.008622 -0.706301 -1.208797
1 -8.413380 -1.689448 -1.453963
1 -8.374080 -0.378071 -0.230573
1 -8.311152 0.028367 -1.961409

```

### bybpin3BOCmetaB

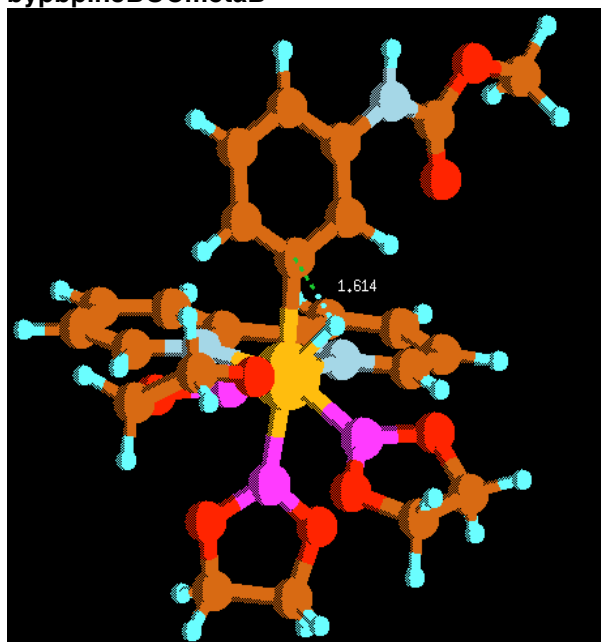

bybpin3BOCmeta low basis temp  
 M06/gen  
 Zero-point correction= 0.527593 (Hartree/Particle)  
 Thermal correction to Energy= 0.564709  
 Thermal correction to Enthalpy= 0.565653  
 Thermal correction to Gibbs Free Energy= 0.455112  
 Sum of electronic and ZPE= -1875.719121  
 Sum of electronic and thermal Energies= -1875.682005  
 Sum of electronic and thermal Enthalpies= -1875.681061  
 Sum of electronic and thermal Free Energies= -1875.791602

| E             | CV        | S         |
|---------------|-----------|-----------|
| KCal/Mol      | Cal/Mol-K | Cal/Mol-K |
| Total 354.360 | 138.300   | 232.653   |

C,0,-3.6135788455,2.1846809741,-0.7161307552

C,0,-2.475601218,2.9765565851,-0.6194770701  
C,0,-1.2081104508,2.3995045861,-0.6314678515  
C,0,-1.0527191088,1.008861127,-0.7245186749  
C,0,-2.205126283,0.2215987502,-0.8578388395  
C,0,-3.4758668195,0.8000117117,-0.8386156973  
lr,0,0.9078717754,0.0876196703,-0.2663352004  
N,0,-0.2242150629,-1.7350552228,0.5784405006  
C,0,-0.7315333501,-1.5974884396,1.817577286  
C,0,-1.5340278049,-2.5903582953,2.3817504461  
C,0,-1.8034108904,-3.7405863398,1.6542990575  
C,0,-1.2579094601,-3.8799978852,0.3856382438  
C,0,-0.4750631446,-2.8482790721,-0.1163860551  
C,0,-0.3560207378,-0.3644194104,2.5437777166  
N,0,0.4450461099,0.5027808571,1.8900647118  
C,0,0.8788031966,1.606875263,2.5106961299  
C,0,0.5127695982,1.9166810305,3.8138836362  
C,0,-0.3315954222,1.0461122478,4.4924718681  
C,0,-0.7646476958,-0.1071165234,3.8543367729  
B,0,2.7399723978,-0.7506998077,0.4050040457  
O,0,3.0400681403,-2.1133181615,0.3341865015  
C,0,4.4161399495,-2.2665435982,0.654180222  
C,0,4.7561120502,-1.0003339363,1.4354238388  
O,0,3.7741947334,-0.0617238476,1.0151800568  
B,0,1.8922883596,-0.8148369457,-1.8391618429  
O,0,3.1599211687,-0.5298072009,-2.3317086557  
C,0,3.4182495281,-1.3873065871,-3.4321121582  
C,0,2.4020354868,-2.5137443084,-3.2666989523  
O,0,1.358301797,-1.9206263949,-2.5055472859  
B,0,1.8839767754,1.7803584044,-0.8184079478  
O,0,2.4177395024,2.71732816,0.0739098226  
C,0,3.0721159469,3.7302144341,-0.6769234242  
C,0,2.4686505744,3.5978580229,-2.0739315117  
O,0,1.9792867683,2.2694903729,-2.1175468413  
H,0,0.1066615761,0.3800909392,-1.6555926904  
H,0,-0.0241135022,-2.8908144558,-1.1072747785  
H,0,-1.9529113728,-2.4717845826,3.3761144954  
H,0,-1.4459593034,-4.76119781,-0.2202032814  
H,0,-2.4376180941,-4.5162579258,2.0758976479  
H,0,-1.4140669874,-0.8029837725,4.3768072337  
H,0,-0.646489295,1.2562728253,5.5117862277  
H,0,0.8871141209,2.8240818643,4.2782993863  
H,0,1.5430193155,2.2419803832,1.9256668645  
H,0,2.8216172889,-3.3599580526,-2.7001480589  
H,0,2.0047329056,-2.8876855852,-4.2173339833  
H,0,4.4580127658,-1.7337408111,-3.3970437672  
H,0,3.2688178685,-0.8296895262,-4.3685754185  
H,0,-0.3342158563,3.0460153989,-0.5502846785  
H,0,-2.5808569563,4.0564717743,-0.5292467164  
H,0,-4.6061165453,2.6346523141,-0.6992588428  
H,0,-2.1218556154,-0.8548803969,-0.9771772942  
N,0,-4.6615368165,0.0434001481,-0.9770550445  
H,0,4.5696411208,-3.189623616,1.2249502506  
H,0,4.9938079598,-2.3326087499,-0.282230498

H,0,4.6715572486,-1.1508725624,2.522167444  
 H,0,5.7573078104,-0.6116368904,1.2170575307  
 H,0,2.8947975516,4.7100068402,-0.2172304018  
 H,0,4.1546019933,3.5354437132,-0.6741886041  
 H,0,1.6310879042,4.2974463576,-2.2263834937  
 H,0,3.1983044852,3.7554576914,-2.8769661631  
 H,0,-5.5042790624,0.552533598,-1.2080788719  
 C,0,-4.8383894577,-1.2860157171,-0.7394861993  
 O,0,-4.0018940211,-2.0931061718,-0.3902532464  
 O,0,-6.1408309656,-1.5996390344,-0.954249689  
 C,0,-6.4672758239,-2.9680867827,-0.749414267  
 H,0,-7.5295093607,-3.0589556314,-0.9812884993  
 H,0,-5.877512692,-3.611478061,-1.4099159882  
 H,0,-6.2795987515,-3.2615209326,0.2885253026

**bybpin3BOCmetaC**

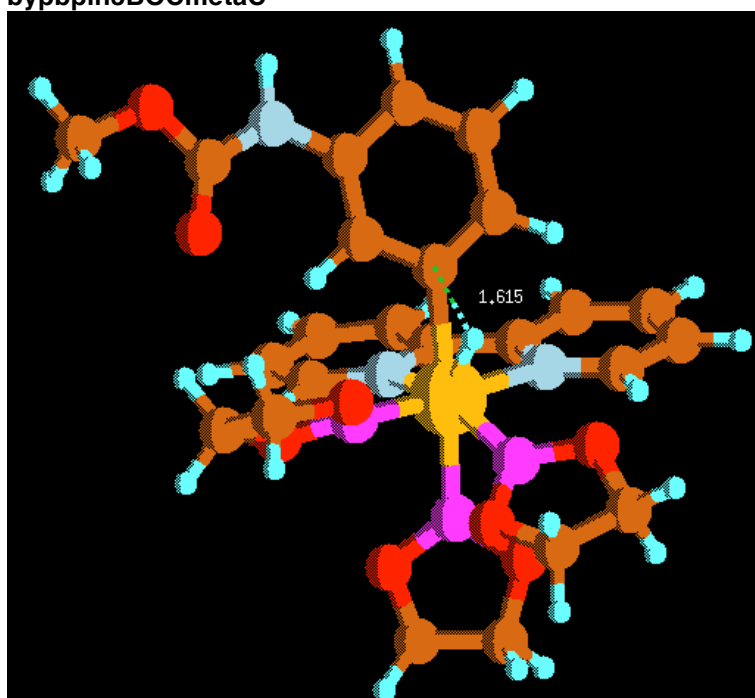

bybpin3BOCmetaC  
 M06/gen  
 E(RM06) = -1876.24577650

Zero-point correction= 0.527752 (Hartree/Particle)  
 Thermal correction to Energy= 0.564828  
 Thermal correction to Enthalpy= 0.565772  
 Thermal correction to Gibbs Free Energy= 0.456204  
 Sum of electronic and ZPE= -1875.718025  
 Sum of electronic and thermal Energies= -1875.680948  
 Sum of electronic and thermal Enthalpies= -1875.680004  
 Sum of electronic and thermal Free Energies= -1875.789572

| E             | CV        | S         |
|---------------|-----------|-----------|
| KCal/Mol      | Cal/Mol-K | Cal/Mol-K |
| Total 354.435 | 138.359   | 230.606   |

C,0,-3.0559333171,3.126453042,-1.0750556758  
C,0,-1.7484876393,3.6193905113,-1.0220209366  
C,0,-0.6730081566,2.7382280837,-0.8952820903  
C,0,-0.8814354618,1.3538712749,-0.8046276535  
C,0,-2.1969580329,0.875895069,-0.8920496175  
C,0,-3.2705122959,1.7555683451,-1.0143166215  
lr,0,0.7958228535,0.0562921687,-0.1460263479  
N,0,-0.7436266763,-1.4062461017,0.7570833382  
C,0,-1.2788527002,-1.0478049572,1.9380284967  
C,0,-2.3480083587,-1.7585184476,2.4885889135  
C,0,-2.8484267423,-2.8623710867,1.8124427403  
C,0,-2.2641108663,-3.2417553875,0.6091424718  
C,0,-1.2106819496,-2.4813874745,0.1155827654  
C,0,-0.6572706127,0.1144649672,2.6097075414  
N,0,0.3358454873,0.7389523626,1.9422569965  
C,0,0.9795052649,1.7638446481,2.5144711162  
C,0,0.6493872862,2.2312699454,3.7803525814  
C,0,-0.3805627685,1.6082502771,4.4737116003  
C,0,-1.0365701858,0.5361972525,3.8852040679  
B,0,2.3665900936,-1.1037770597,0.6892008755  
O,0,2.3855642845,-2.5019874363,0.6825103938  
C,0,3.6775788944,-2.9143756072,1.1063412456  
C,0,4.2134370224,-1.7103364619,1.8764987805  
O,0,3.4734850034,-0.6122322419,1.3583165469  
B,0,1.6251115358,-1.1552285562,-1.5950431033  
O,0,2.934634446,-1.1709668965,-2.0575228789  
C,0,3.0423101087,-2.1553913893,-3.0737151005  
C,0,1.8130819576,-3.0364626589,-2.8668717974  
O,0,0.8946415442,-2.1877643717,-2.1908392877  
B,0,2.1255929477,1.4754457251,-0.7486625432  
O,0,2.8297027933,2.3054932031,0.1212190387  
C,0,3.386014414,3.3893382146,-0.6159787879  
C,0,3.1861891325,3.0035149907,-2.0875462845  
O,0,2.2963176816,1.8997356051,-2.0575762003  
H,0,0.1367329311,0.3869311207,-1.6015826444  
H,0,-0.7114837411,-2.7116415294,-0.8259788075  
H,0,-2.7953742057,-1.4546033184,3.4299375673  
H,0,-2.6179511692,-4.1051395973,0.0533036035  
H,0,-3.6844909009,-3.4214356094,2.2257206982  
H,0,-1.8327695499,0.0290766108,4.4216047717  
H,0,-0.6681421613,1.9448473066,5.4667817917  
H,0,1.1974681661,3.0666616436,4.2057154582  
H,0,1.7830596713,2.1993198974,1.9207670557  
H,0,2.0374099285,-3.9038038344,-2.2264332257  
H,0,1.3701771712,-3.3944166252,-3.8033840535  
H,0,3.9873821378,-2.7005903373,-2.9641559959  
H,0,3.0377059699,-1.6627106753,-4.0571009644  
H,0,0.3304156253,3.1499924457,-0.8744670055  
H,0,-4.2867865025,1.3693874002,-1.0741023596  
H,0,-3.8950852851,3.8142747409,-1.1804100075  
H,0,-2.3917584102,-0.1963830052,-0.8722542131  
N,0,-1.5938700354,5.0199418257,-1.1068816601

H,0,3.6022114883,-3.8258468123,1.7105166581  
H,0,4.2904718449,-3.1309266294,0.2160980879  
H,0,4.0267395968,-1.7948621158,2.9577551837  
H,0,5.2848699856,-1.5395932029,1.7225096393  
H,0,2.8437136537,4.3104558219,-0.363158413  
H,0,4.4419694847,3.5093634023,-0.3438893426  
H,0,2.7365152867,3.8181764208,-2.6691127696  
H,0,4.123460721,2.6985606059,-2.5740991291  
H,0,-2.4440591177,5.5640123617,-1.1712390278  
C,0,-0.4451772312,5.7495890364,-1.1645541563  
O,0,0.6971281831,5.3402713426,-1.1299809943  
O,0,-0.7681153688,7.0625541997,-1.2689588361  
C,0,0.3429476198,7.9477191916,-1.3438450876  
H,0,-0.080504401,8.9508076192,-1.4126979302  
H,0,0.970100948,7.8608084408,-0.4510767882  
H,0,0.9531426786,7.7321533068,-2.2266396871

### bybpin3BOCmetaD

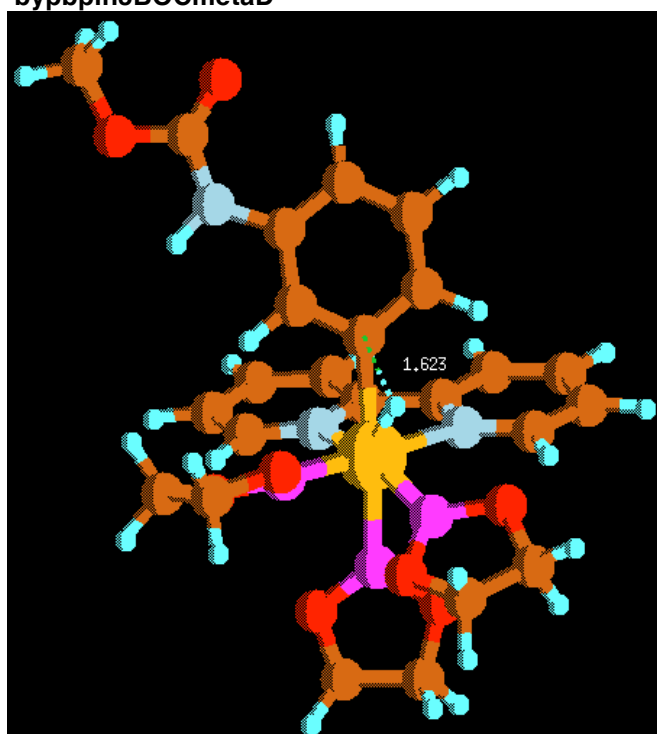

bybpin3BOCmetaD

M06/gen

E(RM06) = -1876.24521864

Zero-point correction= 0.527729 (Hartree/Particle)

Thermal correction to Energy= 0.564933

Thermal correction to Enthalpy= 0.565877

Thermal correction to Gibbs Free Energy= 0.454139

Sum of electronic and ZPE= -1875.717489

Sum of electronic and thermal Energies= -1875.680286

Sum of electronic and thermal Enthalpies= -1875.679342

Sum of electronic and thermal Free Energies= -1875.791080

E CV S  
KCal/Mol Cal/Mol-K Cal/Mol-K  
Total 354.501 138.270 235.173

C,0,3.071916534,2.453771396,-2.2861275216  
C,0,3.352887857,1.4168493203,-1.3941096603  
C,0,2.3210894401,0.5945399261,-0.9256886648  
C,0,0.9903692707,0.7894350758,-1.303932368  
C,0,0.7281403899,1.8173700546,-2.2227470615  
C,0,1.7526828425,2.6326846321,-2.6942757412  
Ir,0,-0.6253706631,-0.2263090986,-0.1743808215  
N,0,-1.9113406107,1.6578519726,-0.4887056807  
C,0,-1.617934735,2.7108052176,0.2957780504  
C,0,-2.2066151799,3.958091022,0.0765573622  
C,0,-3.1194519826,4.1046440187,-0.9583543125  
C,0,-3.4354635417,3.001946221,-1.7433673645  
C,0,-2.8052140159,1.7931327817,-1.4728541041  
C,0,-0.6683169867,2.4576741665,1.4010188679  
N,0,-0.1678671788,1.2078230778,1.491756217  
C,0,0.6484161925,0.8907628872,2.5041548584  
C,0,1.0287007578,1.8162067292,3.4673778735  
C,0,0.5403166614,3.11345451,3.3738390353  
C,0,-0.3216459845,3.4355308983,2.335315459  
B,0,-2.1566637384,-1.0420770085,1.0564544035  
O,0,-3.5174069181,-0.9569581399,0.7496556659  
C,0,-4.2156670698,-1.8025145513,1.6539974837  
C,0,-3.2554979427,-1.9563613395,2.8305847336  
O,0,-1.9774453144,-1.6787312805,2.2721055751  
B,0,-1.7295624584,-1.5963254725,-1.2510099511  
O,0,-1.8907479505,-2.9521123146,-0.997416453  
C,0,-2.6976037455,-3.5073785638,-2.024284188  
C,0,-3.384755554,-2.2962328178,-2.6487417803  
O,0,-2.5133668311,-1.2147108226,-2.3419031979  
B,0,0.5781422927,-1.7950118896,0.2883136238  
O,0,1.1563144014,-2.0086964421,1.5453564486  
C,0,2.1348740665,-3.0313394273,1.4272703125  
C,0,1.8109993943,-3.704654135,0.0946283943  
O,0,1.0780566226,-2.7239899188,-0.6174999529  
H,0,0.0222121859,-0.46724124,-1.6484368515  
H,0,-2.9961739888,0.8915620758,-2.0551079145  
H,0,-1.9565356438,4.8105480235,0.7004325547  
H,0,-4.1518919395,3.0703742432,-2.5567909121  
H,0,-3.5810123482,5.0712105448,-1.1451327352  
H,0,-0.7204893709,4.4420357464,2.2578490846  
H,0,0.8199672443,3.8684463882,4.1043947094  
H,0,1.6960265988,1.5161295014,4.2698657304  
H,0,0.9907513478,-0.1433323611,2.5215965052  
H,0,-4.3675640829,-2.1050876846,-2.1902409607  
H,0,-3.5110464003,-2.3766222474,-3.7342667416  
H,0,-3.402058944,-4.2291223136,-1.5940880765  
H,0,-2.054529151,-4.034510255,-2.744353973  
H,0,2.5809925991,-0.2142959113,-0.2376348858  
H,0,1.5259259758,3.4260229357,-3.4049980796

H,0,3.8696078791,3.0885156416,-2.6552112751  
H,0,-0.2870400967,1.9789498953,-2.5858005354  
N,0,4.6510537201,1.1280262864,-0.9272486863  
H,0,-5.1757390325,-1.349183037,1.9261447585  
H,0,-4.4099795242,-2.7678291269,1.1590274719  
H,0,-3.4660424073,-1.2326561255,3.6321349813  
H,0,-3.2589826999,-2.9629765007,3.263831125  
H,0,3.1378415196,-2.5742922324,1.4232596739  
H,0,2.0706756938,-3.709815995,2.2858415942  
H,0,2.7038509778,-3.9903987789,-0.4740421128  
H,0,1.1834423291,-4.598317295,0.2288554989  
H,0,4.7433263672,0.3206219058,-0.3249726635  
C,0,5.8117231686,1.7911212431,-1.1906360506  
O,0,5.9565906639,2.7790642192,-1.8794549121  
O,0,6.8285797016,1.1675740249,-0.5452372238  
C,0,8.1081890141,1.7585589488,-0.7388264487  
H,0,8.8074884629,1.1470273495,-0.166686165  
H,0,8.3807199571,1.7570277246,-1.7987793589  
H,0,8.119532902,2.7904817214,-0.3740132147

### bybpin3BOCortho

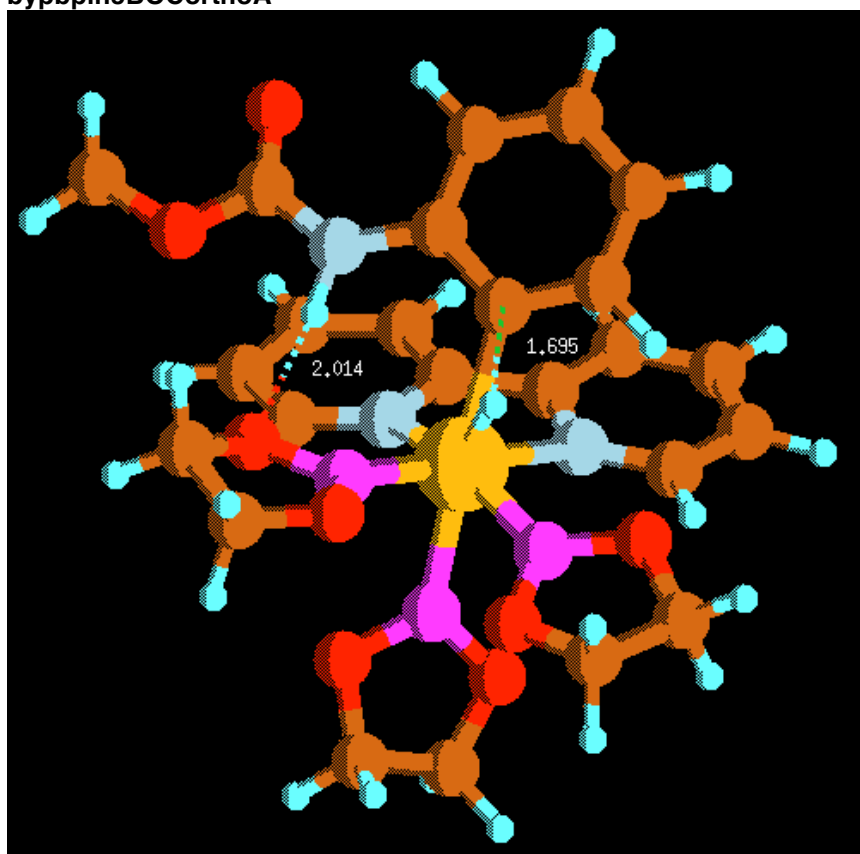

bybpin3BOCortho

M06/gen

E(RM06) = -1876.24986607

Zero-point correction= 0.528726 (Hartree/Particle)

Thermal correction to Energy= 0.565510

Thermal correction to Enthalpy= 0.566454  
Thermal correction to Gibbs Free Energy= 0.458582  
Sum of electronic and ZPE= -1875.721140  
Sum of electronic and thermal Energies= -1875.684356  
Sum of electronic and thermal Enthalpies= -1875.683412  
Sum of electronic and thermal Free Energies= -1875.791284

E CV S  
KCal/Mol Cal/Mol-K Cal/Mol-K  
Total 354.863 137.781 227.036

C,0,2.4355062131,2.6782635118,-2.920431008  
C,0,3.0013649355,1.6533537227,-2.1705357532  
C,0,2.1839390055,0.7085368168,-1.534768968  
C,0,0.7783260848,0.8100849174,-1.6090206651  
C,0,0.2520493567,1.8222184557,-2.4215484609  
C,0,1.0543829453,2.759897062,-3.0659509435  
Ir,0,-0.6145318077,-0.1969103739,-0.1766506648  
N,0,-1.0255139364,2.0540969611,0.366240423  
C,0,0.0040400795,2.669005568,0.97698018  
C,0,0.1007769344,4.0605912127,1.0122010645  
C,0,-0.903910399,4.8245598386,0.4339125725  
C,0,-1.9888674553,4.1815398573,-0.1466538027  
C,0,-2.0032614231,2.7912238521,-0.1636896447  
C,0,0.9849449174,1.7857992528,1.6416271072  
N,0,0.7887521316,0.4581030155,1.5033373198  
C,0,1.5529183261,-0.3917511337,2.1996047453  
C,0,2.5906156775,0.0330139749,3.0187631789  
C,0,2.8500196813,1.394360114,3.10769429  
C,0,2.0287796529,2.2800441858,2.4248482232  
B,0,-1.9735350879,-0.9861256595,1.2473694343  
O,0,-3.0969944906,-0.306239004,1.7085273962  
C,0,-3.7350065291,-1.1121159407,2.6932829714  
C,0,-3.1207086995,-2.4968677069,2.4976619643  
O,0,-1.8845706937,-2.2377241978,1.8426898714  
B,0,-2.4091785504,-0.5899372735,-1.1098790334  
O,0,-3.1664879496,-1.7482976923,-1.1200502425  
C,0,-4.2954229187,-1.54563597,-1.9542774504  
C,0,-4.3998469769,-0.027880317,-2.0745593056  
O,0,-3.0803489329,0.4271148561,-1.795531058  
B,0,-0.0995035134,-2.1534183517,-0.3485120984  
O,0,1.0657777012,-2.6294845492,0.2787639812  
C,0,1.2936071302,-3.9681342279,-0.1516265087  
C,0,-0.0537682394,-4.3882803428,-0.731927631  
O,0,-0.6766650916,-3.1656028491,-1.0877156245  
H,0,-0.4077629443,-0.3904089499,-1.7667449556  
H,0,-2.801251666,2.2310642572,-0.6466387368  
H,0,0.9509448857,4.5496457283,1.4773113878  
H,0,-2.8056333356,4.7380852692,-0.5969218027  
H,0,-0.8387230695,5.9097975467,0.4440235207  
H,0,2.1994688688,3.3483279208,2.5091965337  
H,0,3.6734211714,1.768058459,3.7110281667  
H,0,3.1902885702,-0.6996280082,3.5510541304



H,0,1.3368582028,-1.4475258938,2.0544311648  
H,0,-5.089004956,0.3946762914,-1.3273462784  
H,0,-4.7067446068,0.3136378057,-3.0694277836  
H,0,-5.1808588966,-2.0055068251,-1.5005121443  
H,0,-4.1150734702,-2.0261346066,-2.9269606346  
N,0,2.7510995966,-0.3632734175,-0.8094995055  
H,0,4.0782978859,1.5789268777,-2.0658657114  
H,0,3.0865268354,3.4017620198,-3.4072614664  
H,0,-0.8312976513,1.8847384615,-2.5358452311  
H,0,0.6037766164,3.5398679066,-3.6771499515  
H,0,-3.5218478585,-0.6997680546,3.6905123028  
H,0,-4.8200122881,-1.0963580156,2.5382609418  
H,0,-2.9420433124,-3.0323600524,3.4368783875  
H,0,-3.7383418534,-3.1283078103,1.8414653776  
H,0,2.0949890216,-3.9691764016,-0.9053370865  
H,0,1.6135084591,-4.5804588965,0.698842074  
H,0,0.0337395036,-5.0330314176,-1.6136348744  
H,0,-0.6760211222,-4.8980708314,0.0187336085  
H,0,2.1306762214,-1.1230059046,-0.5300517875  
C,0,4.0321545264,-0.4778537401,-0.3680766718  
O,0,4.9385885261,0.3259209642,-0.4755044482  
O,0,4.1840540566,-1.6782818389,0.2535967689  
C,0,5.4852203628,-1.9161731641,0.768874118  
H,0,5.4397533677,-2.8925289186,1.2553197318  
H,0,6.2291335379,-1.9291932495,-0.0345265785  
H,0,5.7702047919,-1.1437528973,1.4916513448

### bybpin3BOCorthoB

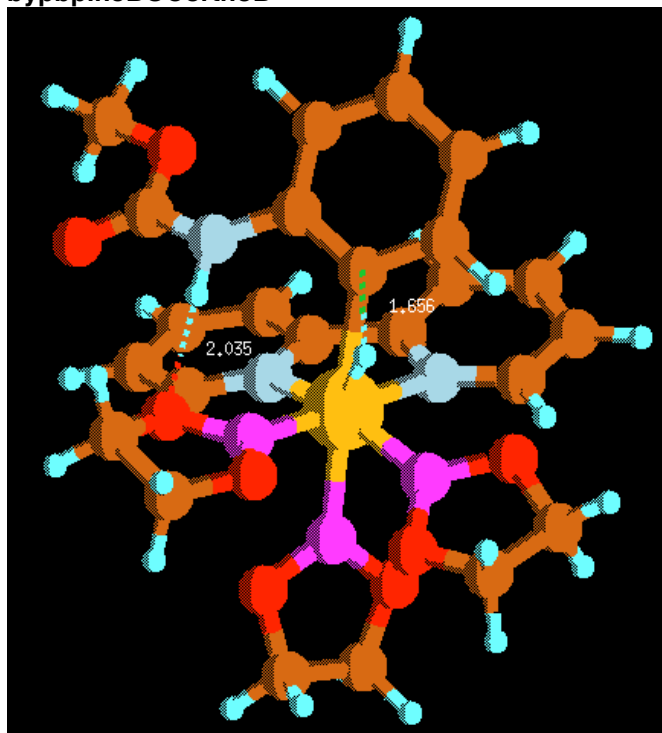

bybpin3BOCortho low basis temp  
M06/gen  
E(RM06) = -1876.24734654

Zero-point correction= 0.528453 (Hartree/Particle)  
Thermal correction to Energy= 0.565065  
Thermal correction to Enthalpy= 0.566009  
Thermal correction to Gibbs Free Energy= 0.459333  
Sum of electronic and ZPE= -1875.718894  
Sum of electronic and thermal Energies= -1875.682282  
Sum of electronic and thermal Enthalpies= -1875.681338  
Sum of electronic and thermal Free Energies= -1875.788013

| E             | CV        | S         |
|---------------|-----------|-----------|
| KCal/Mol      | Cal/Mol-K | Cal/Mol-K |
| Total 354.583 | 137.877   | 224.517   |

C,0,2.262484521,2.5507804287,-3.3764881947  
C,0,2.8855356229,1.6024954201,-2.5753986627  
C,0,2.1296899808,0.7048766162,-1.811274135  
C,0,0.721088806,0.7437859968,-1.8455158898  
C,0,0.1281830818,1.6781680964,-2.7065785347  
C,0,0.8727244589,2.5875232065,-3.4514168139  
Ir,0,-0.5487619721,-0.2687963819,-0.3078457672  
N,0,-0.9845503532,1.9842200604,0.2288799947  
C,0,0.0516068887,2.6137829756,0.8118050951  
C,0,0.1758732159,4.002761498,0.7703061507  
C,0,-0.826243209,4.7538372578,0.1707068777  
C,0,-1.9295825313,4.1000268076,-0.3620056119  
C,0,-1.9590848599,2.7099931113,-0.3232902954  
C,0,1.0174263371,1.7506050758,1.5217480336  
N,0,0.9170569436,0.4222287802,1.3076938591  
C,0,1.6922537852,-0.4128519151,2.0106305149  
C,0,2.6257813693,0.0333185557,2.9378306547  
C,0,2.753529059,1.3997071022,3.1473847769  
C,0,1.9373497997,2.2671232123,2.4346423154  
B,0,-1.7760484415,-1.0566115626,1.2284228031  
O,0,-2.8759242397,-0.389343916,1.7589390564  
C,0,-3.3962747021,-1.168268629,2.8305960378  
C,0,-2.7613382549,-2.5435925879,2.6355515202  
O,0,-1.5991327726,-2.2809067349,1.8582970781  
B,0,-2.3931842525,-0.7147048074,-1.1037801467  
O,0,-3.1348738845,-1.8807666398,-1.0173539541  
C,0,-4.3322602486,-1.7164801552,-1.7588354273  
C,0,-4.4641492843,-0.2046045178,-1.9202697907  
O,0,-3.1316982628,0.2713314012,-1.7679375524  
B,0,0.0000413944,-2.2167320946,-0.5007128197  
O,0,1.2229671904,-2.6587629322,0.0282338038  
C,0,1.4281258318,-4.0125357237,-0.3668710062  
C,0,0.0490307821,-4.4584248915,-0.8500230275  
O,0,-0.6200938837,-3.2505197765,-1.1717043318  
H,0,-0.3909515263,-0.482210443,-1.9032812775  
H,0,-2.7666713243,2.1382761791,-0.7765364529  
H,0,1.0519235766,4.4927660017,1.1848388525  
H,0,-2.7459347852,4.6470239893,-0.8247239632  
H,0,-0.7434817271,5.836918515,0.1222550663



bybpin3BOCortho low basis temp with boc on wrong side  
M06/gen  
E(RM06) = -1876.25433741

Zero-point correction= 0.529284 (Hartree/Particle)  
Thermal correction to Energy= 0.565638  
Thermal correction to Enthalpy= 0.566582  
Thermal correction to Gibbs Free Energy= 0.460429  
Sum of electronic and ZPE= -1875.725053  
Sum of electronic and thermal Energies= -1875.688699  
Sum of electronic and thermal Enthalpies= -1875.687755  
Sum of electronic and thermal Free Energies= -1875.793909

| E             | CV        | S         |
|---------------|-----------|-----------|
| KCal/Mol      | Cal/Mol-K | Cal/Mol-K |
| Total 354.943 | 137.392   | 223.419   |

C,0,2.5062978766,2.7924953065,-2.8111150489  
C,0,3.008637585,1.7369604868,-2.0542551947  
C,0,2.1273484661,0.8022994019,-1.5153957543  
C,0,0.7394653632,0.8934801114,-1.6826041946  
C,0,0.2731532966,1.9128143638,-2.5336091985  
C,0,1.1425551128,2.8693256818,-3.0689375786  
Ir,0,-0.5905656438,-0.1795723974,-0.2308513915  
N,0,-1.2755736654,1.8513627115,0.3834732865  
C,0,-0.3869886374,2.6495501622,1.0068287995  
C,0,-0.6687202171,3.9988281108,1.228475412  
C,0,-1.8873057058,4.5181224928,0.8201411019  
C,0,-2.8130471621,3.6731898131,0.2207729681  
C,0,-2.464196497,2.346083689,0.0216609446  
C,0,0.8597766251,2.0074942115,1.4763498852  
N,0,0.9536519144,0.6788547873,1.2830113365  
C,0,2.0189658273,0.0169712459,1.7414680572  
C,0,3.0691751922,0.654845224,2.3914489736  
C,0,3.0036251805,2.0327796672,2.5585210267  
C,0,1.8847413799,2.7170121353,2.1039675381  
B,0,-1.8136243181,-0.954289557,1.3210845599  
O,0,-2.5827156527,-0.11479373,2.1207085941  
C,0,-3.2341289411,-0.9031828755,3.1089165918  
C,0,-3.1044662714,-2.3324011329,2.5895571378  
O,0,-1.991864119,-2.2779878277,1.7075212732  
B,0,-2.1734977423,-0.7735289624,-1.3565701667  
O,0,-3.4267587415,-1.1555394383,-0.8863593066  
C,0,-4.1856549955,-1.6450561511,-1.984206839  
C,0,-3.514194772,-1.0220368719,-3.2036423063  
O,0,-2.1864201783,-0.7580613145,-2.758300215  
B,0,-0.119007224,-2.1811759698,-0.2030209813  
O,0,0.9446215065,-2.6838593922,0.5430589213  
C,0,1.040301617,-4.0814591995,0.2859062274  
C,0,-0.2973996896,-4.4311624828,-0.3647459017  
O,0,-0.7557546075,-3.1971245441,-0.8960970216  
H,0,0.1956743195,-0.7670166653,-1.5130827152  
H,0,-3.1513035358,1.6488356042,-0.4542445498

H,0,0.0552676781,4.6420902047,1.718089557  
H,0,-3.7862466424,4.0312257496,-0.1021926938  
H,0,-2.1119644022,5.5701901523,0.9738446271  
H,0,1.8204751399,3.792869641,2.2327251962  
H,0,3.8137393599,2.5733809388,3.0418713885  
H,0,3.9205752325,0.0794223128,2.7431419795  
H,0,2.0164473413,-1.057097073,1.5559024222  
H,0,-3.9833969548,-0.0699762627,-3.4961001108  
H,0,-3.4863234914,-1.6857820049,-4.0744229676  
H,0,-5.236694397,-1.356489974,-1.8700083002  
H,0,-4.1201071909,-2.7429070073,-1.9984496778  
N,0,-1.0988891368,1.9326681854,-2.8735951705  
H,0,4.0797729904,1.6389177463,-1.885283196  
H,0,3.1761770325,3.5408204599,-3.2295584094  
H,0,2.5350439041,-0.0171808194,-0.9207447514  
H,0,0.7386774728,3.6680672602,-3.6848602517  
H,0,-2.7242452577,-0.7648259182,4.0739953341  
H,0,-4.2746408484,-0.5757049151,3.2165626454  
H,0,-2.9201694599,-3.0692684369,3.3798606107  
H,0,-3.9932938631,-2.6405576379,2.0188079438  
H,0,1.8898583073,-4.264927153,-0.3880652584  
H,0,1.216421695,-4.6188668263,1.2246520924  
H,0,-0.2091136877,-5.1728145315,-1.166560203  
H,0,-1.0255904002,-4.7902034489,0.3767665392  
H,0,-1.5579388639,1.0228246343,-2.9385645437  
C,0,-1.8729163043,3.0265247265,-3.0521133591  
O,0,-1.5444412484,4.1964985794,-2.9922497029  
O,0,-3.1560020365,2.6284368591,-3.3015493943  
C,0,-4.0590852134,3.6889872686,-3.5756845388  
H,0,-5.0372618492,3.22448492,-3.715026399  
H,0,-4.0909090558,4.4034285806,-2.7457050869  
H,0,-3.7662507955,4.228591095,-4.4826425922

bybpin3BOCpara

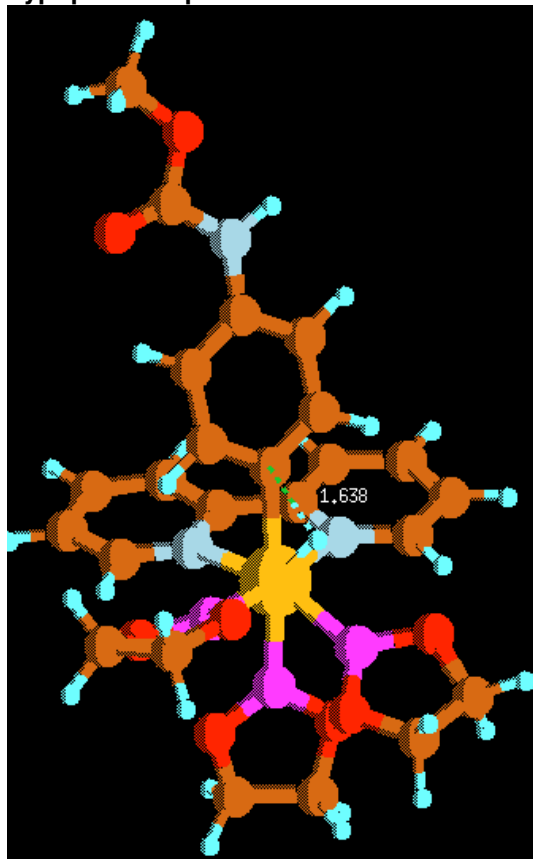

bybpin3BOCpara

M06/gen

E(RM06) = -1876.24401359

Zero-point correction= 0.527814 (Hartree/Particle)

Thermal correction to Energy= 0.564970

Thermal correction to Enthalpy= 0.565915

Thermal correction to Gibbs Free Energy= 0.455277

Sum of electronic and ZPE= -1875.716200

Sum of electronic and thermal Energies= -1875.679043

Sum of electronic and thermal Enthalpies= -1875.678099

Sum of electronic and thermal Free Energies= -1875.788736

| E        | CV        | S               |
|----------|-----------|-----------------|
| KCal/Mol | Cal/Mol-K | Cal/Mol-K       |
| Total    | 354.524   | 138.297 232.855 |

|                                               |
|-----------------------------------------------|
| C,0,-3.7508781351,2.9205611615,-0.9839072807  |
| C,0,-2.6720288427,3.4502265606,-0.2736824862  |
| C,0,-1.4926321897,2.7150085045,-0.1729671972  |
| C,0,-1.3416302199,1.4385263495,-0.7316122455  |
| C,0,-2.4334315951,0.9481136203,-1.4626412055  |
| C,0,-3.6178656287,1.6662935529,-1.5853229267  |
| Ir,0,0.3530670497,0.1508799273,-0.1232111852  |
| N,0,-1.0526248798,-1.6596689902,-0.3312418255 |
| C,0,-1.9427674839,-1.8312096611,0.6632554613  |

C,0,-2.9667345832,-2.7751316689,0.5565019143  
C,0,-3.0527276689,-3.556348521,-0.5873749758  
C,0,-2.1076345682,-3.3907252843,-1.5934958423  
C,0,-1.12035649,-2.4275574242,-1.4232962134  
C,0,-1.7557477039,-0.9843829943,1.8615727751  
N,0,-0.7377148558,-0.0995146709,1.8223140662  
C,0,-0.4736787087,0.658179718,2.8935753486  
C,0,-1.2331575921,0.5885677205,4.0546238566  
C,0,-2.298904824,-0.3010652353,4.1019479272  
C,0,-2.5585426518,-1.1005318002,2.997492868  
B,0,1.8535179881,-1.127923897,0.672836669  
O,0,2.1694721941,-2.3822792969,0.1429952662  
C,0,3.3566936979,-2.8303409203,0.7837156065  
C,0,3.3960151961,-2.0324873515,2.0838426337  
O,0,2.6086692656,-0.881115675,1.8057575206  
B,0,1.744391852,-0.2918386522,-1.578954183  
O,0,3.0975036943,0.0226910075,-1.5892412835  
C,0,3.6590499293,-0.4522504133,-2.8028111858  
C,0,2.6415587339,-1.4722414896,-3.3058423585  
O,0,1.4224448607,-1.0663358188,-2.6968006545  
B,0,1.5085620598,1.776239873,0.2615007064  
O,0,1.8274835739,2.2325627662,1.5445811859  
C,0,2.3845434088,3.5351685475,1.4358891841  
C,0,2.77042929,3.6529443593,-0.0380655696  
O,0,1.9603183011,2.6874776391,-0.6855307225  
H,0,0.0399410158,0.9856148327,-1.4852578027  
H,0,-0.3538136034,-2.2348829466,-2.1745327209  
H,0,-3.6954966862,-2.9009253483,1.3513267851  
H,0,-2.1314859649,-3.9896237945,-2.4992990187  
H,0,-3.8489256799,-4.2900635782,-0.6877629753  
H,0,-3.3802705739,-1.8095321881,3.0244773661  
H,0,-2.9212181711,-0.3783800494,4.9900676134  
H,0,-0.9874360981,1.2259849397,4.8987268098  
H,0,0.3773964152,1.3315313983,2.7914794131  
H,0,2.8864486191,-2.4911705787,-2.968288028  
H,0,2.5305153366,-1.4770740506,-4.3961777482  
H,0,4.6469223097,-0.8874579671,-2.6095496728  
H,0,3.7795790304,0.3901239669,-3.4999142495  
H,0,-0.6672047002,3.1668289582,0.3782781288  
H,0,-2.7581140739,4.4263383224,0.1913422127  
H,0,-4.4474900943,1.2523530894,-2.1606679882  
H,0,-2.3649456402,-0.0212992005,-1.9586919519  
N,0,-4.9789695649,3.5918497441,-1.1535628464  
H,0,3.3166948534,-3.9154003348,0.9333748442  
H,0,4.2185897953,-2.5953831555,0.1379626983  
H,0,2.9456613583,-2.5858405574,2.9215524414  
H,0,4.4073934269,-1.7272591896,2.3748037717  
H,0,1.6234021024,4.2784810823,1.7214140826  
H,0,3.236579425,3.6331542179,2.1185653701  
H,0,2.5740253721,4.6465433939,-0.4577079143  
H,0,3.829714837,3.4065787572,-0.2052425365  
H,0,-5.6643298807,3.1423731653,-1.7458368402  
C,0,-5.3708455798,4.7808890066,-0.6157836117

O,0,-4.7351331453,5.5005774365,0.1252608981  
 O,0,-6.6280456737,5.0607649072,-1.0412037832  
 C,0,-7.1617886386,6.2860083125,-0.5527228315  
 H,0,-8.1619403069,6.3659186177,-0.9813393666  
 H,0,-7.2152826206,6.2778318974,0.5404162009  
 H,0,-6.5434606744,7.1319503506,-0.868572398

**bybpin3BOCparaB**

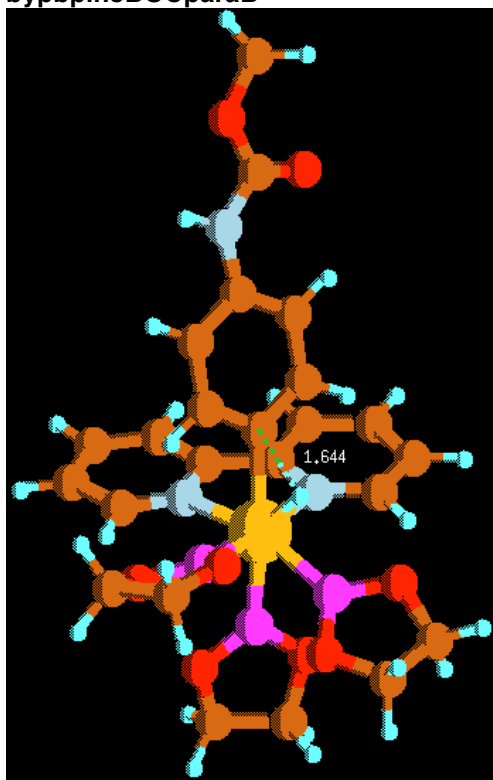

bybpin3BOCparaB low basis  
 M06/gen  
 E(RM06) = -1876.24428321

Zero-point correction= 0.527068 (Hartree/Particle)  
 Thermal correction to Energy= 0.564490  
 Thermal correction to Enthalpy= 0.565435  
 Thermal correction to Gibbs Free Energy= 0.453334  
 Sum of electronic and ZPE= -1875.717216  
 Sum of electronic and thermal Energies= -1875.679793  
 Sum of electronic and thermal Enthalpies= -1875.678849  
 Sum of electronic and thermal Free Energies= -1875.790949

| E                                                  | CV        | S         |
|----------------------------------------------------|-----------|-----------|
| KCal/Mol                                           | Cal/Mol-K | Cal/Mol-K |
| Total 354.223                                      | 138.657   | 235.936   |
| Zero-point correction= 0.527067 (Hartree/Particle) |           |           |
| Thermal correction to Energy= 0.564490             |           |           |
| Thermal correction to Enthalpy= 0.565435           |           |           |
| Thermal correction to Gibbs Free Energy= 0.453334  |           |           |
| Sum of electronic and ZPE= -1875.717216            |           |           |



Sum of electronic and thermal Energies= -1875.679793  
Sum of electronic and thermal Enthalpies= -1875.678849  
Sum of electronic and thermal Free Energies= -1875.790949

E CV S  
KCal/Mol Cal/Mol-K Cal/Mol-K  
Total 354.223 138.657 235.935

C,0,4.0125151551,0.0033547704,-1.06656327  
C,0,3.4732460674,-1.0016399373,-0.2587322856  
C,0,2.0967032445,-1.1396746075,-0.1244932444  
C,0,1.2004340026,-0.2684021304,-0.7618820957  
C,0,1.7714644735,0.7050858072,-1.5928156603  
C,0,3.1479889664,0.859415207,-1.7500634455  
Ir,0,-0.9222466097,-0.2021637065,-0.1442841021  
N,0,-0.9014079955,2.0477541839,-0.6411396715  
C,0,-0.2872665202,2.8421748097,0.254128795  
C,0,-0.0279222558,4.1840555304,-0.0329948316  
C,0,-0.4269435894,4.7044199098,-1.2563071008  
C,0,-1.0879268922,3.8805580719,-2.1597942476  
C,0,-1.3050403036,2.5530012449,-1.8104835007  
C,0,0.0703996552,2.2146420657,1.5453170865  
N,0,-0.2004412603,0.8988367214,1.6743944061  
C,0,0.0407697863,0.2808055069,2.8370619909  
C,0,0.5875385129,0.9433660397,3.9284077425  
C,0,0.8897683957,2.2939764953,3.8046833998  
C,0,0.6237528331,2.9367706898,2.6040925172  
B,0,-2.8879477319,0.0059215264,0.646557004  
O,0,-3.8750376617,0.7987651025,0.054351345  
C,0,-5.1002035759,0.5332773359,0.7239661329  
C,0,-4.6662126081,-0.0408809688,2.0696081008  
O,0,-3.3585452257,-0.5434915907,1.8259303163  
B,0,-2.3160272792,-0.8536831879,-1.517375158  
O,0,-3.2317184016,-1.8904183465,-1.382706887  
C,0,-3.9684501441,-1.9984726986,-2.590960414  
C,0,-3.7398324391,-0.658065423,-3.2837176762  
O,0,-2.5130604536,-0.1953202355,-2.7335645907  
B,0,-0.8555223034,-2.1304322723,0.4866958872  
O,0,-0.8336209665,-2.5206406937,1.8302013676  
C,0,-0.5047126834,-3.9009176597,1.8967755692  
C,0,-0.7448879368,-4.4091763825,0.4760249282  
O,0,-0.6639983965,-3.2435952671,-0.3251206679  
H,0,-0.1812737952,-0.8385791617,-1.446910405  
H,0,-1.8035421312,1.8476838501,-2.4758972127  
H,0,0.48755616,4.8195361883,0.6804653812  
H,0,-1.4245229045,4.2503149333,-3.123985769  
H,0,-0.223538618,5.7447762387,-1.4981475762  
H,0,0.8401132763,3.9951404995,2.4974985768  
H,0,1.3220315618,2.8461578279,4.6356107311  
H,0,0.7692757519,0.4023947134,4.8523090361  
H,0,-0.2247775479,-0.7757209522,2.8679365967  
H,0,-4.5346766784,0.064944638,-3.0433513375  
H,0,-3.6528839741,-0.7385064301,-4.3732124541

H,0,-5.0236364207,-2.1937774974,-2.366002136  
 H,0,-3.5765625176,-2.8404399607,-3.1805902382  
 H,0,1.7230203746,-1.9483499508,0.5044934852  
 H,0,4.1403585264,-1.6861384875,0.2676447693  
 H,0,3.5493752277,1.6313812137,-2.3979684728  
 H,0,1.1254330982,1.3784247795,-2.1572215845  
 N,0,5.4174716941,0.0718029653,-1.1606328705  
 H,0,-5.6897276076,1.4534726812,0.8081638364  
 H,0,-5.675685444,-0.1997397138,0.1356228591  
 H,0,-4.6168000141,0.7324393902,2.8508467244  
 H,0,-5.3132111622,-0.8507187589,2.4251147537  
 H,0,0.5499807397,-4.0078010375,2.1974070478  
 H,0,-1.1299124561,-4.3963205089,2.6486930784  
 H,0,0.0010274686,-5.1423469585,0.1467087762  
 H,0,-1.7439031949,-4.8570079062,0.3654162251  
 H,0,5.9399545103,-0.654195876,-0.6887058124  
 C,0,6.173738129,1.0099526808,-1.7960456866  
 O,0,5.7812917963,1.9789590444,-2.4117257011  
 O,0,7.4839047819,0.6979302308,-1.6374551481  
 C,0,8.3907860714,1.6015370369,-2.2580072038  
 H,0,9.3878371025,1.2048352081,-2.0606924929  
 H,0,8.2098160669,1.6548258029,-3.3359797203  
 H,0,8.2912512704,2.605581367,-1.8336017948

### Irbpy\_Bpin3

Irbpy\_Bpin3 Ir(bpy)(Bpin)3 is the active form of the catalyst. This structure is similar to that calculated by Sakaki with B3LYP and a smaller basis set.

M06/gen

E(RM06) = -1361.09057697

Zero-point correction= 0.371139 (Hartree/Particle)

Thermal correction to Energy= 0.396940

Thermal correction to Enthalpy= 0.397885

Thermal correction to Gibbs Free Energy= 0.313304

Sum of electronic and ZPE= -1360.719438

Sum of electronic and thermal Energies= -1360.693637

Sum of electronic and thermal Enthalpies= -1360.692692

Sum of electronic and thermal Free Energies= -1360.777273

| E             | CV        | S         |
|---------------|-----------|-----------|
| KCal/Mol      | Cal/Mol-K | Cal/Mol-K |
| Total 249.084 | 96.118    | 178.015   |

Ir,0,0.0176902836,0.0460349192,-0.2888757923  
 N,0,-1.8538041595,-1.2247832997,-0.0062686815  
 C,0,-1.7921189396,-2.512223938,0.3476118331  
 C,0,-2.925488719,-3.2783338526,0.5867282899  
 C,0,-4.1706197341,-2.6737068195,0.4601133701  
 C,0,-4.2381755445,-1.3331352882,0.1037065775  
 C,0,-3.0555300875,-0.6282189365,-0.1270900407  
 C,0,-3.0348477074,0.8081020573,-0.4900280422  
 C,0,-4.1944425945,1.5308836279,-0.7723234331  
 C,0,-4.0959018365,2.8816554699,-1.0808931181

C,0,-2.8434754537,3.4832312595,-1.0955314534  
C,0,-1.7281851531,2.7021082344,-0.8139527485  
N,0,-1.8215722945,1.3979017099,-0.5257689143  
H,0,-0.7907711523,-2.9247908106,0.4510700725  
H,0,-2.8263787338,-4.3214269582,0.8716440192  
H,0,-5.0828283722,-3.2360202344,0.6432327898  
H,0,-5.2041501044,-0.8438912464,0.0216648658  
H,0,-5.1667721606,1.0473630666,-0.7631142028  
H,0,-4.9910744689,3.456094558,-1.306543683  
H,0,-2.7225432075,4.5380019603,-1.3236866231  
H,0,-0.7154643933,3.1073838758,-0.8003080974  
B,0,1.5158199291,-1.276965962,-0.5563978065  
O,0,1.8307402677,-1.7077274494,-1.8475507842  
C,0,2.855349522,-2.6844141842,-1.7623855406  
C,0,3.4035214562,-2.5298908655,-0.3442258914  
O,0,2.3421944955,-1.9178392257,0.371471911  
H,0,3.6720079122,-3.4839239519,0.1257077941  
H,0,4.28071191,-1.8656733579,-0.3194054792  
H,0,3.6109625972,-2.5017527414,-2.5359234675  
H,0,2.4238946201,-3.6839514174,-1.9305969819  
H,0,2.928543775,-0.782029499,3.1446677002  
H,0,2.382349859,0.6113504083,4.125844079  
C,0,0.8206051441,-0.8904467008,3.707995069  
H,0,1.0305789495,-1.8705017071,4.1527912232  
H,0,0.1682852968,-0.3285323849,4.3944129536  
O,0,0.1591065156,-1.0577304512,2.4626380706  
B,0,0.7088404245,-0.14285599,1.5607710138  
O,0,1.7396042896,0.5742092909,2.1597961621  
B,0,1.5581203438,1.3566249969,-0.4920498101  
O,0,2.9107287967,1.0831538241,-0.6937416922  
C,0,3.648407764,2.271146575,-0.4716973054  
C,0,2.6228668899,3.3878056911,-0.6551863817  
O,0,1.3745088606,2.7502370448,-0.4231518353  
H,0,4.0527627755,2.2566569271,0.5521998455  
H,0,4.4855469906,2.3331025443,-1.1774553246  
H,0,2.7555801873,4.215636433,0.05150383  
H,0,2.6385826573,3.796712268,-1.6772687657  
C,0,2.0840314197,-0.1080797828,3.3542157095

### Irbpy\_Bpin3 Isomer B

This is an alternative isomer that is slightly lower in energy.

M06/gen

E(RM06) = -1361.09051610

Zero-point correction= 0.370807 (Hartree/Particle)

Thermal correction to Energy= 0.396820

Thermal correction to Enthalpy= 0.397764

Thermal correction to Gibbs Free Energy= 0.312274

Sum of electronic and ZPE= -1360.719709

Sum of electronic and thermal Energies= -1360.693696

Sum of electronic and thermal Enthalpies= -1360.692752

Sum of electronic and thermal Free Energies= -1360.778242

E CV S  
KCal/Mol Cal/Mol-K Cal/Mol-K  
Total 249.008 96.269 179.929

B,0,1.692786538,12.8875448334,5.6407656346  
B,0,1.9813407921,11.0298443329,3.7297630086  
B,0,2.5173353617,10.5405820385,6.2661351842  
C,0,-0.313858819,11.4863345859,8.3591765148  
H,0,0.7578461528,11.4258263238,8.536344993  
C,0,-1.2139960623,11.7020569535,9.3945373931  
H,0,-0.8554876842,11.8022225559,10.4145743272  
C,0,-2.5663027972,11.7930745875,9.086367329  
C,0,-2.9677323752,11.6680411218,7.7627857913  
C,0,-2.0055334431,11.4458336439,6.7760237953  
C,0,-2.3443384128,11.3246805757,5.3389888575  
C,0,-3.6597886399,11.2669859103,4.877493239  
H,0,-4.4937107382,11.2768093166,5.5730802863  
C,0,-3.8982838978,11.1824670144,3.5117633314  
C,0,-2.8193721186,11.1636806168,2.6362122535  
H,0,-2.9611748436,11.1070408649,1.5610692923  
C,0,-1.5341434789,11.2137389003,3.1644467089  
H,0,-0.641687234,11.210616385,2.5372942534  
C,0,2.8456097582,14.8196181405,5.3001008243  
C,0,2.4661738637,14.6921788455,6.776041294  
C,0,3.721511406,10.674745681,2.2824305398  
C,0,2.6229038522,11.4663456143,1.5761223675  
C,0,4.6495345825,10.4053582545,7.0468070627  
C,0,3.9951349957,9.0272958918,7.1353288773  
Ir,0,0.8049060841,11.1320867066,5.382676982  
N,0,-0.6976375434,11.3548694517,7.0856429012  
N,0,-1.303435399,11.28464317,4.4814613811  
O,0,2.5223113011,13.5545856727,4.7468952648  
O,0,1.5077292852,13.6453799433,6.7996429221  
O,0,3.325246147,10.6691859361,3.6422147631  
O,0,1.5055506585,11.3549988938,2.4456980143  
O,0,3.564516933,11.2883921813,6.8107521722  
O,0,2.7735711824,9.1765045249,6.4302732749  
H,0,-4.0190809885,11.7588583445,7.5064017687  
H,0,-4.9181772896,11.1331424297,3.1381252705  
H,0,-3.3037344439,11.9669904327,9.8659669906  
H,0,3.9106673422,15.0304681471,5.1475994242  
H,0,2.0303885932,15.6086920765,7.1919229211  
H,0,2.260272192,15.6002563754,4.7902101051  
H,0,3.3297327658,14.4000872858,7.3923367112  
H,0,5.1779455984,10.6965289354,7.9628417092  
H,0,3.7842218503,8.7369388026,8.176870744  
H,0,3.7832275041,9.6382493623,1.9159221903  
H,0,2.3702681998,11.0699632013,0.5850799403  
H,0,4.7122539856,11.1346044837,2.1837074623  
H,0,2.8891374413,12.5289093149,1.4724844531  
H,0,5.3505372492,10.4673992771,6.2006598375  
H,0,4.5984865931,8.2362790618,6.6737666376

## References

- 1) Uson, R.; Oro, L. A.; Cabeza, J. A. *Inorg. Synth.* **1985**, *23*, 126-130.
- 2) Dr. Luis Sanchez and the MSU Mass Spectrometry facility are thanked for obtaining ESI+ HRMS.
- 3) Chankeshwara, S. V.; Chakraborti, A. K. *Org. Lett.* **2006**, *8*, 3259-3262.
- 4) Thorne, M. P. *Can. J. Chem.* **1967**, *45*, 2537-2546.
- 5) Mayes, B. A.; Chaudhuri, N. C.; Hencken, C. P.; Jeannot, F.; Latham, G. M.; Mathieu, S.; McGarry, F. P.; Stewart, A. J.; Wang, J. Y.; Moussa, A. *Org. Process Res. Dev.* **2010**, *14*, 1248-1253.
- 6) Dr. Il Hwan An is thanked for preparing the referenced compounds.
- 7) Chen, L.; Wang, Q.; Huang, R.; Mao, C. H.; Shang, J.; Bi, F. C. *J. Agric. Food. Chem.* **2005**, *53*, 38-41.
- 8) Hwang, D. J.; Yang, J.; Xu, H. P.; Rakov, I. M.; Mohler, M. L.; Dalton, J. T.; Miller, D. *D. Biorg. Med. Chem.* **2006**, *14*, 6525-6538.
- 9) Varala, R.; Nuvula, S.; Adapa, S. R. *J. Org. Chem.* **2006**, *71*, 8283-8286.
- 10) Hartwig, J. F.; Kawatsura, M.; Hauck, S. I.; Shaughnessy, K. H.; Alcazar-Roman, L. M. *J. Org. Chem.* **1999**, *64*, 5575-5580.
- 11) Terada, M.; Sorimachi, K. *J. Am. Chem. Soc.* **2007**, *129*, 292.
- 12) Cowdenm, C.; Banwell, A.; Ho, I. C. S. *J. Nat. Pro.* **1994**, *57*, 1746.
- 13) Kang, W.-K.; Wang, G.-Y.; Yao, J. *Chem. Res. Chin. Univ.* **2006**, *22*, 669.
- 14) Raje, V. P.; Bhat, R. P.; Samant, S. D. *Tetrahedron Lett.* **2005**, *46*, 835.
- 15) Gaussian 09, Revision A.02, Frisch, M. J.; Trucks, G. W.; Schlegel, H. B.; Scuseria, G. E.; Robb, M. A.; Cheeseman, J. R.; Scalmani, G.; Barone, V.; Mennucci, B.; Petersson, G. A.; Nakatsuji, H.; Caricato, M.; Li, X.; Hratchian, H. P.; Izmaylov, A. F.; Bloino, J.; Zheng, G.; Sonnenberg, J. L.; Hada, M.; Ehara, M.; Toyota, K.; Fukuda, R.; Hasegawa, J.; Ishida, M.; Nakajima, T.; Honda, Y.; Kitao, O.; Nakai, H.; Vreven, T.; Montgomery, Jr., J. A.; Peralta, J. E.; Ogliaro, F.; Bearpark, M.; Heyd, J. J.; Brothers, E.; Kudin, K. N.; Staroverov, V. N.; Kobayashi, R.; Normand, J.; Raghavachari, K.; Rendell, A.; Burant, J. C.; Iyengar, S. S.; Tomasi, J.; Cossi, M.; Rega, N.; Millam, N. J.; Klene, M.; Knox, J. E.; Cross, J. B.; Bakken, V.; Adamo, C.; Jaramillo, J.; Gomperts, R.; Stratmann, R. E.; Yazyev, O.; Austin, A. J.; Cammi, R.; Pomelli, C.; Ochterski, J. W.; Martin, R. L.; Morokuma, K.; Zakrzewski, V. G.; Voth, G. A.; Salvador, P.; Dannenberg, J. J.; Dapprich, S.; Daniels, A. D.; Farkas, Ö.; Foresman, J. B.; Ortiz, J. V.; Cioslowski, J.; Fox, D. J. Gaussian, Inc., Wallingford CT, 2009.
